# Supplementary material for: In Vivo Disruption of an Rb–E2F–Ezh2 Signaling Loop Causes Bladder Cancer
Source: Oxford University Press journal article supplement (doi:10.1158/0008-5472.can-14-1218), 2014-09-25
Supplement: 00085472can141218-sup-130432_2_supp_2585844_n9gpn1.xlsx [file 00085472can141218-sup-130432_2_supp_2585844_n9gpn1.xlsx]

## Sheet: T Test mouse tumors
Original row	Probe Set ID	Gene Accession	Gene Symbol	mRna - Description	Normal Bladder mean	Normal Bladder std.dev.	Tumor mean	Tumor std.dev.	Absolute t value	Degrees of freedom	Raw p value	Adj p value	fold change	False Discovery Rate	1.C3	2.C4	3.C5	4.C6	13.C7	14.C8	15.T9	5.T11	16.T12	17.T13	18.T14	19.T15	20.T16
3893	10385325	NM_013917	Pttg1	Mus musculus pituitary tumor-transforming gene 1 (Pttg1), transcript variant 2, mRNA.	-1.03541	0.0555642	0.887494	0.0802101	50.7849	10	0	0	-1.9229	0	-1.07479	-1.03081	-1.07151	-1.05385	-0.926591	-1.0549	0.890575	0.877823	0.939437	0.90718	0.776131	0.805922	1.01539
1532	10361110	NM_029766	Dtl	Mus musculus denticleless homolog (Drosophila) (Dtl), mRNA.	-1.03388	0.0630269	0.886186	0.10753	39.9159	9	0	0	-1.92007	0	-1.03798	-0.929739	-1.08428	-1.10193	-0.995877	-1.05349	0.921098	0.836171	0.68285	0.903861	0.876688	1.02134	0.961288
1184	10357436	NM_008567	Mcm6	Mus musculus minichromosome maintenance deficient 6 (MIS5 homolog, S. pombe) (S. cerevisiae) (Mcm6), mRNA.	-1.03366	0.0980315	0.885996	0.0878386	36.917	10	0	0	-1.91966	0	-1.11951	-0.873795	-1.11446	-1.06572	-0.955877	-1.07261	0.936458	0.907252	0.723376	0.840584	0.878488	1.00475	0.91106
16233	10507112	NM_009185	Stil	Mus musculus Scl/Tal1 interrupting locus (Stil), mRNA.	-1.03357	0.0720348	0.885919	0.108355	38.0706	10	0	0	-1.91949	0	-1.00696	-0.910306	-1.03701	-1.03978	-1.09475	-1.11263	0.959798	0.795881	0.694642	0.970393	0.862557	0.928213	0.989952
7515	10420426	NM_198605	F630043A04Rik	Mus musculus RIKEN cDNA F630043A04 gene (F630043A04Rik), mRNA.	-1.03253	0.0344847	0.88503	0.138048	35.4822	6	0	0	-1.91756	0	-0.985185	-0.994368	-1.06409	-1.03807	-1.06166	-1.05183	1.0121	0.957499	0.627127	0.92272	0.768859	0.920657	0.986247
23786	10578690	NM_146208	Neil3	Mus musculus nei like 3 (E. coli) (Neil3), mRNA.	-1.03239	0.0419629	0.884904	0.138362	34.8406	7	0	0	-1.91729	0	-1.03736	-0.963097	-1.06622	-1.00168	-1.05994	-1.06603	0.990997	0.706145	0.676206	0.937812	0.958592	1.02511	0.899465
22070	10563780	NM_001013368	E2f8	Mus musculus E2F transcription factor 8 (E2f8), mRNA.	-1.03225	0.0606163	0.884783	0.134505	33.905	8	0	0	-1.91703	0	-1.04831	-0.931883	-1.06157	-1.09151	-0.987328	-1.07288	0.811762	0.890979	0.639386	0.876355	0.954655	1.06745	0.952891
21037	10554325	NM_029835	5730590G19Rik	Mus musculus RIKEN cDNA 5730590G19 gene (5730590G19Rik), mRNA.	-1.03222	0.0916248	0.884761	0.119388	32.7062	10	0	0	-1.91698	0	-0.977933	-0.914394	-1.11269	-0.987754	-1.03934	-1.16123	0.849392	0.8485	0.685872	0.9842	0.817915	0.984533	1.02292
21047	10554445	NM_145150	Prc1	Mus musculus protein regulator of cytokinesis 1 (Prc1), mRNA.	-1.0321	0.105442	0.884658	0.111563	31.8091	10	0	0	-1.91676	0	-1.13467	-0.854063	-1.11484	-1.05178	-0.964885	-1.07237	0.731525	0.885411	0.806897	0.934914	0.809791	0.964069	1.06
8648	10432511	NM_012025	Racgap1	Mus musculus Rac GTPase-activating protein 1 (Racgap1), transcript variant 1, mRNA.	-1.03208	0.0909226	0.884636	0.122151	32.355	10	0	0	-1.91671	0	-1.03541	-0.862559	-1.07227	-1.02631	-1.06433	-1.13157	0.756903	0.983833	0.724038	0.861376	0.847118	0.962676	1.05651
17935	10524169	NM_011132	Pole	Mus musculus polymerase (DNA directed), epsilon (Pole), mRNA.	-1.0317	0.0813799	0.884313	0.133173	31.7691	10	0	0	-1.91601	0	-1.02757	-0.970191	-1.12235	-1.04126	-0.9134	-1.11542	1.04844	0.789922	0.682581	0.885338	0.893834	1.05087	0.839206
23496	10575733	NM_028131	Cenpn	Mus musculus centromere protein N (Cenpn), mRNA.	-1.03161	0.101767	0.884238	0.122307	30.8243	10	0	0	-1.91585	0	-1.0986	-0.856359	-1.06672	-1.01386	-1.00323	-1.15089	0.720176	0.81877	0.770482	1.02814	0.862574	0.996088	0.993435
11721	10462866	NM_001164362	Cep55	Mus musculus centrosomal protein 55 (Cep55), transcript variant 1, mRNA.	-1.03161	0.0833454	0.884237	0.133432	31.4913	10	0	0	-1.91585	0	-1.12774	-0.888969	-1.09734	-1.04543	-1.00848	-1.02169	0.729471	0.99952	0.708179	0.929769	0.855017	0.894938	1.07277
7562	10420877	NM_028039	Esco2	Mus musculus establishment of cohesion 1 homolog 2 (S. cerevisiae) (Esco2), mRNA.	-1.03141	0.0675543	0.884064	0.143406	31.4965	8	0	0	-1.91547	0	-1.06643	-0.924347	-1.04497	-1.125	-0.996973	-1.03073	1.06666	0.72362	0.749348	1.09152	0.859956	0.844582	0.852756
3672	10382998	NM_001012273	Birc5	Mus musculus baculoviral IAP repeat-containing 5 (Birc5), transcript variant 3, mRNA.	-1.03117	0.0569544	0.883859	0.150262	31.2051	7	0	0	-1.91503	0	-1.06927	-0.949657	-1.00844	-0.989694	-1.07806	-1.0919	0.805803	0.814086	0.622254	0.974643	0.893761	1.0442	1.03227
5389	10400589	NM_172578	Mis18bp1	Mus musculus MIS18 binding protein 1 (Mis18bp1), mRNA.	-1.03113	0.0911523	0.883829	0.135996	30.1768	10	0	0	-1.91496	0	-1.0976	-0.917585	-1.03272	-1.11735	-0.921419	-1.10013	0.90681	0.708654	0.850172	1.04231	0.704603	0.982433	0.991813
24970	10590494	NM_010620	Kif15	Mus musculus kinesin family member 15 (Kif15), mRNA.	-1.03108	0.104358	0.88378	0.128688	29.6143	10	0	0	-1.91486	0	-1.01261	-0.833032	-1.09762	-1.03711	-1.09723	-1.10885	0.861217	0.71518	0.781001	0.929582	0.824755	1.09698	0.977743
17640	10521090	NM_001040435	Tacc3	Mus musculus transforming, acidic coiled-coil containing protein 3 (Tacc3), mRNA.	-1.031	0.118689	0.883715	0.119107	28.9495	10	0	0	-1.91472	0	-1.14281	-0.828531	-1.01764	-1.06403	-0.985406	-1.14759	0.872467	0.790476	0.712544	0.838201	0.906992	1.02996	1.03536
22378	10565570	NM_001080995	4632434I11Rik	Mus musculus RIKEN cDNA 4632434I11 gene (4632434I11Rik), mRNA.	-1.03081	0.0797919	0.883552	0.146116	29.8569	9	0	0	-1.91436	0	-1.17293	-0.977554	-1.00206	-0.960821	-1.07465	-0.996854	0.894395	0.926807	0.720563	0.990978	0.934425	1.06403	0.653669
25378	10594426	NM_026507	Zwilch	Mus musculus Zwilch, kinetochore associated, homolog (Drosophila) (Zwilch), mRNA.	-1.03081	0.0858747	0.883551	0.143229	29.6818	9	0	0	-1.91436	0	-1.09502	-0.99354	-1.16053	-1.01523	-0.91369	-1.00684	0.919046	0.821048	0.647041	1.02974	0.781685	1.04888	0.93741
17694	10521731	NM_019438	Ncapg	Mus musculus non-SMC condensin I complex, subunit G (Ncapg), mRNA.	-1.03057	0.0393328	0.883342	0.162176	30.2044	6	0	0	-1.91391	0	-1.03092	-0.978962	-1.05529	-1.09225	-1.00866	-1.01731	0.884118	0.688282	0.657608	0.999731	0.857392	1.0365	1.05977
178	10346365	NM_199007	Sgol2	Mus musculus shugoshin-like 2 (S. pombe) (Sgol2), transcript variant 1, mRNA.	-1.03047	0.117679	0.883259	0.128151	28.0517	10	0	0	-1.91373	0	-1.0194	-0.981385	-1.18857	-1.11564	-0.844849	-1.03297	0.773513	0.891807	0.683457	1.05423	0.848754	0.92989	1.00116
10040	10446074	NM_010931	Uhrf1	Mus musculus ubiquitin-like, containing PHD and RING finger domains, 1 (Uhrf1), transcript variant 1, mRNA.	-1.0304	0.144362	0.883203	0.104156	26.9999	8	0	0	-1.91361	0	-0.978641	-0.802245	-1.05806	-1.00394	-1.1021	-1.23743	0.811127	0.850111	0.715488	0.865876	0.946936	1.01468	0.978199
7644	10421877	NM_019670	Diap3	Mus musculus diaphanous homolog 3 (Drosophila) (Diap3), mRNA.	-1.03035	0.0761959	0.883154	0.153605	29.0516	9	0	0	-1.9135	0	-1.11657	-0.99321	-1.02863	-1.07234	-0.900647	-1.07068	0.877591	0.822948	0.619722	0.89091	0.865459	1.12564	0.979807
18926	10534974	NM_008568	Mcm7	Mus musculus minichromosome maintenance deficient 7 (S. cerevisiae) (Mcm7), mRNA.	-1.03019	0.149574	0.88302	0.101905	26.5002	8	0	0	-1.91321	0	-1.21058	-0.912111	-1.21346	-1.03388	-0.924354	-0.886753	0.879174	0.79132	0.705585	0.950675	0.923277	1.00146	0.929647
19645	10542079	NM_008021	Foxm1	Mus musculus forkhead box M1 (Foxm1), mRNA.	-1.02999	0.0461047	0.882852	0.167355	28.9846	7	0	0	-1.91285	0	-1.08814	-0.974011	-1.06394	-1.01322	-0.985025	-1.05564	0.931953	0.955897	0.62146	0.957572	0.681024	0.944673	1.08739
14174	10487340	NM_144818	Ncaph	Mus musculus non-SMC condensin I complex, subunit H (Ncaph), mRNA.	-1.02999	0.162266	0.882848	0.0886326	25.7679	7	0	0	-1.91284	0	-1.10403	-0.850026	-1.17201	-1.12049	-0.797267	-1.13611	0.798035	0.813923	0.770568	0.946444	0.894331	0.968869	0.987767
15238	10497831	NM_009828	Ccna2	Mus musculus cyclin A2 (Ccna2), mRNA.	-1.0298	0.164839	0.882684	0.0888046	25.4315	7	0	0	-1.91248	0	-1.06926	-0.698469	-1.15182	-1.08955	-1.086	-1.08368	0.764306	0.92924	0.801765	0.92278	0.820648	0.926003	1.01405
4497	10391461	NM_009764	Brca1	Mus musculus breast cancer 1 (Brca1), mRNA.	-1.02972	0.0525053	0.882615	0.168939	28.3919	7	0	0	-1.91233	0	-1.04858	-0.975863	-1.00714	-1.04169	-0.986052	-1.11898	0.910085	0.667759	0.637093	1.0292	0.88407	1.05651	0.993587
15956	10504470	NM_010790	Melk	Mus musculus maternal embryonic leucine zipper kinase (Melk), mRNA.	-1.02957	0.0656297	0.882486	0.166801	27.9124	8	0	0	-1.91205	0	-1.01979	-1.11171	-1.09102	-0.99762	-0.930114	-1.02715	0.790507	0.801161	0.606575	0.893752	0.940514	1.07834	1.06656
15840	10503315	NM_001039556	Rad54b	Mus musculus RAD54 homolog B (S. cerevisiae) (Rad54b), transcript variant 1, mRNA.	-1.02931	0.0575766	0.882266	0.172135	27.6332	7	0	0	-1.91158	0	-1.02946	-1.03604	-0.92373	-1.06794	-1.09165	-1.02705	0.824896	0.767647	0.657179	1.11117	0.764029	1.06607	0.984871
26399	10603431	NM_011514	Suv39h1	Mus musculus suppressor of variegation 3-9 homolog 1 (Drosophila) (Suv39h1), mRNA.	-1.02926	0.0822067	0.882219	0.164231	27.0881	9	0	0	-1.91147	0	-1.01959	-0.97423	-1.03281	-1.0041	-0.957732	-1.18708	0.926401	0.729685	0.617777	0.906705	0.888565	0.991663	1.11474
12967	10474902	NM_011234	Rad51	Mus musculus RAD51 homolog (S. cerevisiae) (Rad51), mRNA.	-1.02919	0.0695938	0.882159	0.169813	27.2308	8	0	0	-1.91134	0	-1.03632	-0.95669	-1.09337	-1.09812	-0.933086	-1.05753	0.909792	0.734082	0.591657	0.96093	0.899577	1.10987	0.969206
11993	10465861	NM_016692	Incenp	Mus musculus inner centromere protein (Incenp), mRNA.	-1.02913	0.109852	0.882111	0.151753	26.2502	10	0	0	-1.91124	0	-0.961956	-0.959681	-0.955983	-1.16532	-0.955474	-1.17637	0.753471	0.809842	0.646913	0.91769	1.01335	0.960474	1.07304
26126	10601011	ENSMUST00000048962	Kif4	cdna:known chromosome:NCBIM37:X:97821076:97922553:1 gene:ENSMUSG00000034311 gene_biotype:protein_coding transcript_biotype:protein_coding	-1.02906	0.0835807	0.882052	0.165914	26.7694	9	0	0	-1.91111	0	-0.940091	-1.00514	-1.04721	-1.04068	-0.964504	-1.17674	0.814324	0.694381	0.696068	0.940223	0.855723	1.04923	1.12442
22851	10569038	NM_178381	Ano9	Mus musculus anoctamin 9 (Ano9), mRNA.	-1.02902	0.0770305	0.882017	0.169	26.8413	8	0	0	-1.91104	0	-1.03776	-0.904633	-1.09593	-1.1099	-0.976998	-1.0489	0.862816	0.781619	0.574769	1.01253	0.87864	1.07961	0.984135
1402	10359890	NM_023284	Nuf2	Mus musculus NUF2, NDC80 kinetochore complex component, homolog (S. cerevisiae) (Nuf2), mRNA.	-1.02895	0.0615626	0.881961	0.174915	27.0179	7	0	0	-1.91092	0	-1.02385	-1.00002	-0.990646	-1.0173	-0.990479	-1.15144	0.756037	0.809589	0.63079	1.05612	0.81953	1.11458	0.987084
9219	10438378	NM_009862	Cdc45	Mus musculus cell division cycle 45 (Cdc45), transcript variant 1, mRNA.	-1.02867	0.0764586	0.88172	0.173086	26.3555	8	0	0	-1.91039	0	-1.02361	-0.896435	-1.0598	-1.0779	-0.999251	-1.11504	0.896842	0.804208	0.549895	1.0334	0.856151	1.05941	0.972135
759	10352767	NM_010892	Nek2	Mus musculus NIMA (never in mitosis gene a)-related expressed kinase 2 (Nek2), mRNA.	-1.02854	0.0954992	0.881605	0.166556	25.7963	9	0	0	-1.91014	0	-0.955406	-0.928852	-1.00761	-1.0145	-1.06882	-1.19604	0.753207	0.888535	0.635059	0.860415	0.859804	1.04388	1.13034
18054	10525591	NM_001042421	Kntc1	Mus musculus kinetochore associated 1 (Kntc1), mRNA.	-1.02831	0.0382077	0.881409	0.187075	26.3745	6	0	0	-1.90972	0	-0.983701	-1.00899	-1.04843	-1.07387	-0.992408	-1.06247	0.791424	0.819158	0.58702	1.03387	0.831595	1.16842	0.938382
8516	10430825	NM_025639	Cenpm	Mus musculus centromere protein M (Cenpm), transcript variant 1, mRNA.	-1.02826	0.136991	0.881365	0.144124	24.4599	10	0	0	-1.90962	0	-0.984094	-0.865858	-0.961744	-0.99816	-1.09553	-1.26417	0.979569	0.875354	0.797673	0.990442	1.06283	0.827766	0.635917
13496	10480432	NM_025979	Mastl	Mus musculus microtubule associated serine/threonine kinase-like (Mastl), mRNA.	-1.02813	0.107025	0.881257	0.165369	25.0375	10	0	0	-1.90939	0	-1.16904	-0.933938	-1.14718	-1.0316	-0.93878	-0.94827	0.883883	0.658348	0.733618	1.06303	0.768745	0.996755	1.06442
2575	10371888	NM_001080129	Tmpo	Mus musculus thymopoietin (Tmpo), transcript variant 3, mRNA.	-1.02808	0.146967	0.881208	0.138251	23.997	10	0	0	-1.90928	0	-1.1865	-0.97119	-1.17964	-1.00559	-0.791126	-1.03441	0.742956	0.971757	0.691526	0.894836	0.844443	1.10067	0.922265
20554	10550102	NM_001083188	Lig1	Mus musculus ligase I, DNA, ATP-dependent (Lig1), transcript variant 1, mRNA.	-1.02801	0.107024	0.881155	0.166744	24.8955	10	0	0	-1.90917	0	-1.0755	-0.869603	-1.02404	-1.00371	-0.998549	-1.19668	0.861281	0.988394	0.583927	0.853572	0.79676	1.10085	0.983302
17066	10515257	NM_009015	Rad54l	Mus musculus RAD54 like (S. cerevisiae) (Rad54l), transcript variant 1, mRNA.	-1.02801	0.0286175	0.881148	0.191564	26.0312	6	0	0	-1.90915	0	-1.08031	-0.992646	-1.02209	-1.02397	-1.02042	-1.0286	0.685071	0.658185	0.739808	0.914506	0.947964	1.1282	1.0943
12966	10474875	NM_029617	Casc5	Mus musculus cancer susceptibility candidate 5 (Casc5), mRNA.	-1.02776	0.133146	0.880938	0.153429	24.0138	10	0	0	-1.9087	0	-1.16563	-0.826234	-1.14287	-0.944278	-0.979407	-1.10815	0.776675	0.729594	0.760442	0.957291	0.797498	1.01448	1.13058
4527	10391811	NM_197959	Kif18b	Mus musculus kinesin family member 18B (Kif18b), mRNA.	-1.02772	0.10774	0.880907	0.169647	24.5463	10	0	0	-1.90863	0	-0.863936	-1.01278	-0.976877	-1.0196	-1.14006	-1.1531	0.629716	0.935238	0.697757	1.0052	0.823153	0.986792	1.08849
20133	10546163	NM_008564	Mcm2	Mus musculus minichromosome maintenance deficient 2 mitotin (S. cerevisiae) (Mcm2), mRNA.	-1.02757	0.0872262	0.88077	0.180888	24.7555	8	0	0	-1.90834	0	-1.02312	-0.871988	-1.12497	-1.03816	-1.01573	-1.09142	0.848066	0.962062	0.512114	0.844021	0.92282	1.04451	1.0318
9894	10444927	NM_134122	Nrm	Mus musculus nurim (nuclear envelope membrane protein) (Nrm), mRNA.	-1.02753	0.116588	0.88074	0.166935	24.1447	10	0	0	-1.90827	0	-1.19485	-0.871766	-1.04323	-1.09705	-0.924633	-1.03365	1.09276	0.99306	0.686654	1.02557	0.885937	0.817059	0.664151
14763	10493137	NM_001033484	Iqgap3	Mus musculus IQ motif containing GTPase activating protein 3 (Iqgap3), mRNA.	-1.02742	0.0550648	0.880649	0.19255	25.0503	7	0	0	-1.90807	0	-1.0795	-0.927694	-1.04662	-1.00189	-1.05089	-1.05794	0.842763	0.913703	0.597294	1.01033	0.691515	0.939098	1.16983
11935	10465282	ENSMUST00000025752	Pola2	cdna:known chromosome:NCBIM37:19:5940543:5964206:-1 gene:ENSMUSG00000024833 gene_biotype:protein_coding transcript_biotype:protein_coding	-1.02736	0.104557	0.880595	0.175301	24.2075	9	0	0	-1.90796	0	-1.12083	-0.942562	-1.10553	-0.891889	-1.13257	-0.970782	1.01475	0.721073	0.725258	0.885751	0.862024	1.19856	0.756753
2621	10372342	NM_001081035	Nav3	Mus musculus neuron navigator 3 (Nav3), mRNA.	-1.02723	0.13855	0.88048	0.156058	23.3439	10	0	0	-1.90771	0	-0.954129	-1.06363	-0.936064	-1.18981	-0.845601	-1.17412	0.835157	0.895596	0.564117	0.973095	1.02883	0.871665	0.994899
830	10353420	ENSMUST00000053266	Mcm3	cdna:known chromosome:NCBIM37:1:20793055:20810359:-1 gene:ENSMUSG00000041859 gene_biotype:protein_coding transcript_biotype:protein_coding	-1.02721	0.156162	0.880463	0.141805	22.9042	10	0	0	-1.90767	0	-1.11153	-0.740511	-1.07094	-1.00491	-1.03446	-1.20089	0.812238	0.946209	0.61988	0.881265	0.888989	1.08318	0.931475
4620	10392943	NM_008258	Hn1	Mus musculus hematological and neurological expressed sequence 1 (Hn1), mRNA.	-1.02716	0.140448	0.88042	0.155505	23.2318	10	0	0	-1.90758	0	-1.06229	-0.993569	-1.14576	-1.09991	-0.75997	-1.10144	0.593392	0.909311	0.793077	0.925161	1.07975	0.870437	0.991816
12976	10474984	NM_133851	Nusap1	Mus musculus nucleolar and spindle associated protein 1 (Nusap1), transcript variant 1, mRNA.	-1.02704	0.136309	0.880316	0.159999	23.2091	10	0	0	-1.90735	0	-1.01069	-0.822831	-1.08362	-0.974546	-1.03146	-1.23907	0.753467	0.876985	0.702265	1.0487	0.72227	0.965655	1.09287
10807	10453715	---	---	cdna:genscan chromosome:NCBIM37:18:7504095:7549524:1 transcript_biotype:protein_coding	-1.027	0.10296	0.880289	0.179919	23.8575	9	0	0	-1.90729	0	-0.900486	-0.927947	-1.00588	-1.04373	-1.1393	-1.14468	0.882827	0.877097	0.678504	1.1327	0.695622	0.794981	1.10029
12670	10472782	NM_026115	Hat1	Mus musculus histone aminotransferase 1 (Hat1), mRNA.	-1.02674	0.0853655	0.880066	0.190056	23.8823	8	0	0	-1.90681	0	-1.13388	-1.05774	-1.07528	-0.973804	-0.889529	-1.03023	0.857021	1.02478	0.517402	0.899315	0.798613	1.10502	0.958316
8986	10436106	NM_172616	C330027C09Rik	Mus musculus RIKEN cDNA C330027C09 gene (C330027C09Rik), mRNA.	-1.02671	0.094607	0.880036	0.186737	23.699	9	0	0	-1.90674	0	-1.08363	-0.905198	-1.12097	-1.03397	-0.915701	-1.10079	0.879698	0.682266	0.673441	0.960449	0.776909	0.996311	1.19118
11491	10460738	ENSMUST00000025704	Cdca5	cdna:known chromosome:NCBIM37:19:6084983:6091777:1 gene:ENSMUSG00000024791 gene_biotype:protein_coding transcript_biotype:protein_coding	-1.02667	0.169306	0.880004	0.13633	22.116	9	0	0	-1.90667	0	-1.14092	-0.749773	-1.02059	-0.9127	-1.15052	-1.18552	0.821772	0.976895	0.610219	0.92527	0.866217	1.02333	0.936328
1603	10361995	NM_027930	Fam54a	Mus musculus family with sequence similarity 54, member A (Fam54a), mRNA.	-1.02665	0.0985635	0.879987	0.185609	23.5754	9	0	0	-1.90664	0	-1.09445	-0.904644	-1.02667	-1.02924	-1.17025	-0.934657	0.8801	0.826445	0.530989	1.09517	0.881656	1.06898	0.876569
16024	10504957	ENSMUST00000117280	Smc2	cdna:known chromosome:NCBIM37:4:52452115:52501132:1 gene:ENSMUSG00000028312 gene_biotype:protein_coding transcript_biotype:protein_coding	-1.02646	0.104185	0.879821	0.185038	23.2882	9	0	0	-1.90628	0	-1.09366	-0.948079	-1.16937	-1.08961	-0.918756	-0.939272	0.894391	0.629644	0.632031	0.875681	1.01543	1.077	1.03457
12396	10469816	NM_031167	Il1rn	Mus musculus interleukin 1 receptor antagonist (Il1rn), transcript variant 1, mRNA.	-1.02646	0.128396	0.879821	0.171897	22.8353	10	0	0	-1.90628	0	-0.853817	-0.940558	-1.0101	-1.19	-1.00457	-1.15969	0.589766	0.902309	0.913083	1.15045	0.854925	0.780238	0.967976
21958	10562637	NM_172301	Ccnb1	Mus musculus cyclin B1 (Ccnb1), mRNA.	-1.02633	0.175254	0.879709	0.13487	21.6966	9	0	0	-1.90604	0	-1.17311	-0.695842	-1.05619	-1.13727	-0.981876	-1.11368	0.713621	0.892663	0.760185	0.94755	0.803788	0.926998	1.11316
674	10351867	NM_001013779	Aim2	Mus musculus absent in melanoma 2 (Aim2), mRNA.	-1.0263	0.178016	0.879686	0.132202	21.611	9	0	0	-1.90599	0	-1.05287	-0.68278	-1.02975	-1.14471	-1.06609	-1.18161	0.864018	0.788293	0.628057	0.945725	0.976133	0.98212	0.973458
11714	10462796	NM_010615	Kif11	Mus musculus kinesin family member 11 (Kif11), mRNA.	-1.02628	0.146003	0.879669	0.161859	22.3144	10	0	0	-1.90595	0	-1.11532	-0.756025	-1.12624	-1.05401	-0.971115	-1.13497	0.829772	0.763493	0.68137	0.934433	0.777517	1.04269	1.12841
6591	10411739	NM_172301	Ccnb1	Mus musculus cyclin B1 (Ccnb1), mRNA.	-1.02614	0.167607	0.879545	0.145267	21.722	10	0	0	-1.90568	0	-1.17728	-0.712079	-1.05319	-1.10937	-0.981948	-1.12294	0.711822	0.871725	0.748878	0.95605	0.797985	0.934181	1.13617
3145	10377405	NM_011496	Aurkb	Mus musculus aurora kinase B (Aurkb), mRNA.	-1.02604	0.203726	0.879466	0.10138	20.8086	7	0	0	-1.90551	0	-0.968089	-0.710752	-1.02213	-0.956302	-1.24676	-1.25223	0.872038	0.907034	0.707533	0.918973	0.791952	1.01186	0.946865
695	10352048	NM_012012	Exo1	Mus musculus exonuclease 1 (Exo1), mRNA.	-1.02596	0.0957537	0.879391	0.193795	22.9487	9	0	0	-1.90535	0	-0.961147	-1.00875	-0.897481	-1.03677	-1.07686	-1.17473	0.894088	0.71282	0.640936	0.884043	0.780194	1.20277	1.04089
14117	10486255	NM_001042653	Oip5	Mus musculus Opa interacting protein 5 (Oip5), mRNA.	-1.02579	0.0998363	0.879248	0.193715	22.7338	9	0	0	-1.90504	0	-1.13615	-0.941109	-1.06697	-0.878689	-1.02157	-1.11026	1.08301	0.706029	0.55453	1.01552	0.815476	1.01222	0.967951
1520	10360985	NM_001081363	Cenpf	Mus musculus centromere protein F (Cenpf), mRNA.	-1.02577	0.0546251	0.87923	0.208392	23.2712	6	0	0	-1.905	0	-1.07863	-0.974012	-1.04285	-0.998057	-0.965948	-1.09511	0.709636	1.02529	0.608358	0.960372	0.674678	1.06183	1.11445
10296	10448506	ENSMUST00000073425	Ccnf	cdna:known chromosome:NCBIM37:17:24359494:24388292:-1 gene:ENSMUSG00000072082 gene_biotype:protein_coding transcript_biotype:protein_coding	-1.02574	0.0826714	0.879205	0.200823	22.932	8	0	0	-1.90494	0	-1.06921	-0.87124	-1.04637	-1.08435	-0.996647	-1.08662	0.574004	0.991987	0.700656	0.971717	0.808239	0.932279	1.17555
16527	10510172	NM_008252	Hmgb2	Mus musculus high mobility group box 2 (Hmgb2), mRNA.	-1.02573	0.0952168	0.879197	0.196224	22.7494	8	0	0	-1.90493	0	-1.08133	-0.940575	-1.08436	-0.883398	-1.03297	-1.13175	0.826344	0.713558	0.607196	0.829479	0.928403	1.09849	1.15091
24645	10586448	NM_026515	2810417H13Rik	Mus musculus RIKEN cDNA 2810417H13 gene (2810417H13Rik), mRNA.	-1.02566	0.211793	0.879141	0.0944999	20.3611	6	0	0	-1.9048	0	-1.0138	-0.677751	-0.93469	-1.06327	-1.29573	-1.16874	0.792781	0.854546	0.721315	0.923387	0.918912	0.972532	0.970509
19320	10538832	NM_019499	Mad2l1	Mus musculus MAD2 mitotic arrest deficient-like 1 (Mad2l1), mRNA.	-1.02562	0.183171	0.879106	0.136035	20.9887	9	0	0	-1.90473	0	-1.13524	-0.864769	-1.29395	-0.969004	-0.800844	-1.08993	0.921771	0.88133	0.675008	1.04492	0.76069	0.83555	1.03447
14187	10487480	NM_001113179	Bub1	Mus musculus budding uninhibited by benzimidazoles 1 homolog (S. cerevisiae) (Bub1), transcript variant 1, mRNA.	-1.02558	0.0730608	0.879072	0.205346	22.907	7	0	0	-1.90466	0	-1.02108	-0.911553	-1.0927	-1.0117	-0.999772	-1.1167	0.661875	0.730077	0.718685	1.02938	0.766688	1.08285	1.16394
7385	10419323	NM_144553	Dlgap5	Mus musculus discs, large (Drosophila) homolog-associated protein 5 (Dlgap5), mRNA.	-1.02558	0.0973023	0.879065	0.196871	22.5803	9	0	0	-1.90464	0	-1.11525	-0.89598	-0.962075	-1.09087	-0.962541	-1.12673	0.723513	0.975547	0.589431	0.965428	0.732991	1.0448	1.12174
28175	10518352	---	---	---	-1.02551	0.111502	0.879007	0.191165	22.3018	9	0	0	-1.90451	0	-0.995394	-0.914116	-1.06996	-0.892656	-1.10308	-1.17784	0.791508	0.788397	0.617069	0.774905	0.934837	1.09483	1.1515
7063	10416037	ENSMUST00000022612	Pbk	cdna:known chromosome:NCBIM37:14:66424674:66436659:1 gene:ENSMUSG00000022033 gene_biotype:protein_coding transcript_biotype:protein_coding	-1.02543	0.133818	0.878939	0.179674	21.8498	10	0	0	-1.90437	0	-1.01297	-0.966339	-1.08459	-1.15568	-0.795503	-1.1375	0.726455	0.832397	0.6037	0.874966	0.958948	1.01969	1.13642
17388	10518350	NM_008252	Hmgb2	Mus musculus high mobility group box 2 (Hmgb2), mRNA.	-1.02538	0.0998749	0.878896	0.197694	22.3711	9	0	0	-1.90428	0	-1.01876	-0.922724	-1.0621	-0.894387	-1.1212	-1.1331	0.789019	0.771574	0.606989	0.789583	0.929916	1.10378	1.16141
9257	10438690	NM_145480	Rfc4	Mus musculus replication factor C (activator 1) 4 (Rfc4), mRNA.	-1.02532	0.141907	0.878849	0.175571	21.6162	10	0	0	-1.90417	0	-1.15095	-0.794146	-1.17959	-1.06	-0.944998	-1.02225	0.86239	0.797323	0.564586	0.930504	0.944551	1.14631	0.90628
15207	10497520	NM_007900	Ect2	Mus musculus ect2 oncogene (Ect2), transcript variant 1, mRNA.	-1.02532	0.146909	0.878842	0.172203	21.5144	10	0	0	-1.90416	0	-1.10096	-0.847989	-1.23811	-1.00669	-0.876992	-1.08115	0.770041	0.86232	0.677745	0.921716	0.749533	0.981367	1.18917
24164	10582501	NM_016925	Fanca	Mus musculus Fanconi anemia, complementation group A (Fanca), mRNA.	-1.02524	0.11981	0.878779	0.189619	21.9436	10	0	0	-1.90402	0	-1.03068	-0.980884	-1.19259	-1.12612	-0.859092	-0.962094	1.0358	0.834322	0.490704	0.95611	0.944886	1.04336	0.846262
17133	10515836	NM_172301	Ccnb1	Mus musculus cyclin B1 (Ccnb1), mRNA.	-1.02518	0.18272	0.878726	0.142591	20.6885	9	0	0	-1.90391	0	-1.13882	-0.685304	-1.15721	-1.11902	-0.947054	-1.10367	0.747816	0.858955	0.744153	0.958422	0.781893	0.918326	1.14151
12960	10474825	NM_026412	D2Ertd750e	Mus musculus DNA segment, Chr 2, ERATO Doi 750, expressed (D2Ertd750e), mRNA.	-1.02508	0.170043	0.878638	0.15636	20.8812	10	0	0	-1.90372	0	-1.09304	-0.806002	-0.985765	-0.872744	-1.13139	-1.26153	0.735622	0.915901	0.697558	0.948541	0.7337	1.07817	1.04097
24474	10584710	NM_010436	H2afx	Mus musculus H2A histone family, member X (H2afx), mRNA.	-1.02506	0.0924251	0.878623	0.203697	22.2031	8	0	0	-1.90368	0	-1.04211	-0.878587	-1.16113	-1.04883	-0.983164	-1.03654	0.614636	0.947608	0.691414	0.845843	0.790368	1.0857	1.17479
16721	10512065	---	---	cdna:pseudogene chromosome:NCBIM37:4:39842241:39843195:-1 gene:ENSMUSG00000084220 gene_biotype:pseudogene transcript_biotype:transcribed_processed_pseudogene	-1.025	0.0604974	0.878572	0.213976	22.5108	7	0	0	-1.90357	0	-1.02965	-1.09873	-0.995437	-1.0814	-0.932067	-1.01272	0.754174	0.821978	0.493374	0.934122	0.988116	1.00123	1.15701
17087	10515431	NM_134471	Kif2c	Mus musculus kinesin family member 2C (Kif2c), mRNA.	-1.02492	0.0697838	0.878506	0.212301	22.354	7	0	0	-1.90343	0	-1.02202	-0.967252	-1.12518	-1.00599	-0.942479	-1.08663	0.728235	0.779429	0.688853	0.942569	0.718816	1.02428	1.26736
14093	10485963	NM_181416	Arhgap11a	Mus musculus Rho GTPase activating protein 11A (Arhgap11a), mRNA.	-1.02489	0.13397	0.87848	0.185169	21.4288	10	0	0	-1.90337	0	-1.09799	-0.872135	-1.2418	-0.972758	-0.920407	-1.04427	0.78658	0.768769	0.599991	1.00502	0.830189	1.01383	1.14498
6841	10414315	NM_028222	Cdkn3	Mus musculus cyclin-dependent kinase inhibitor 3 (Cdkn3), mRNA.	-1.02487	0.107293	0.878461	0.199342	21.8393	9	0	0	-1.90333	0	-1.13486	-0.929636	-1.10025	-1.06635	-0.85825	-1.05988	0.722391	1.06958	0.600785	0.900968	0.716642	1.04935	1.0895
5222	10399087	NM_133762	Ncapg2	Mus musculus non-SMC condensin II complex, subunit G2 (Ncapg2), mRNA.	-1.02486	0.104757	0.878452	0.200564	21.8677	9	0	0	-1.90331	0	-1.02617	-0.932811	-1.11712	-1.12861	-0.868355	-1.07609	1.03577	0.605703	0.633529	1.03471	0.92511	1.1042	0.810132
23244	10572906	NM_008566	Mcm5	Mus musculus minichromosome maintenance deficient 5, cell division cycle 46 (S. cerevisiae) (Mcm5), mRNA.	-1.02476	0.148273	0.87837	0.177241	21.0785	10	0	0	-1.90313	0	-1.0946	-0.790103	-1.05728	-0.930409	-1.05345	-1.22275	0.702774	0.890265	0.617359	0.991284	0.820697	1.11338	1.01283
3796	10384373	NM_001163359	Fignl1	Mus musculus fidgetin-like 1 (Fignl1), transcript variant 1, mRNA.	-1.02473	0.126561	0.878341	0.191087	21.4303	10	0	0	-1.90307	0	-1.16876	-0.868741	-1.04622	-1.1463	-0.884426	-1.03394	0.981109	0.634962	0.714817	0.83581	0.844897	1.22231	0.914481
23274	10573261	NM_024184	Asf1b	Mus musculus ASF1 anti-silencing function 1 homolog B (S. cerevisiae) (Asf1b), mRNA.	-1.02467	0.177022	0.878291	0.154824	20.4642	10	0	0	-1.90296	0	-0.971042	-0.705851	-1.19176	-1.10573	-1.01631	-1.15735	0.690888	1.01841	0.658546	0.986044	0.814927	1.00324	0.975977
3301	10379127	NM_017407	Spag5	Mus musculus sperm associated antigen 5 (Spag5), mRNA.	-1.02461	0.127471	0.878239	0.191771	21.3254	10	0	0	-1.90285	0	-1.12537	-0.836771	-1.02718	-0.964859	-0.992285	-1.20121	0.733364	0.809172	0.636179	0.95023	0.772482	1.12173	1.12451
1003	10355329	NM_007525	Bard1	Mus musculus BRCA1 associated RING domain 1 (Bard1), mRNA.	-1.0246	0.0762715	0.878232	0.213308	22.0167	7	0	0	-1.90284	0	-0.981824	-1.02633	-0.899228	-1.11703	-1.07288	-1.05033	0.790179	0.586244	0.620702	1.12024	0.965956	1.03563	1.02867
2409	10369815	NM_007659	Cdk1	Mus musculus cyclin-dependent kinase 1 (Cdk1), mRNA.	-1.02459	0.226948	0.878224	0.0863816	19.3699	6	0	0	-1.90282	0	-1.18541	-0.732831	-1.21542	-0.855418	-0.884909	-1.27358	0.905578	0.852336	0.724288	0.877633	0.853266	0.927311	1.00715
23675	10577508	NM_001004140	Ckap2	Mus musculus cytoskeleton associated protein 2 (Ckap2), mRNA.	-1.02452	0.172591	0.878161	0.160748	20.4506	10	0	0	-1.90268	0	-1.2194	-0.885976	-1.03907	-0.759533	-1.15691	-1.08624	0.772046	0.909781	0.641823	0.936474	0.758592	1.06519	1.06322
24194	10582809	NM_009387	Tk1	Mus musculus thymidine kinase 1 (Tk1), mRNA.	-1.02433	0.0616869	0.877995	0.21961	21.9311	7	0	0	-1.90232	0	-1.09387	-1.00922	-1.03124	-1.08759	-0.929239	-0.994819	0.837808	1.16757	0.567618	1.01393	0.806063	1.08131	0.671657
8769	10433721	NM_023317	Nde1	Mus musculus nuclear distribution gene E homolog 1 (A nidulans) (Nde1), transcript variant a, mRNA.	-1.02424	0.134641	0.877922	0.191352	20.9394	10	0	0	-1.90216	0	-1.27745	-0.985594	-1.02085	-0.930147	-0.897456	-1.03396	0.930904	0.892034	0.468167	0.922114	1.08426	0.926782	0.921193
17597	10520521	NM_007681	Cenpa	Mus musculus centromere protein A (Cenpa), mRNA.	-1.02424	0.158262	0.877918	0.175692	20.5304	10	0	0	-1.90216	0	-0.988217	-0.773803	-1.02543	-1.02354	-1.06639	-1.26804	0.632167	0.925945	0.722171	1.00671	0.754422	0.998167	1.10584
6073	10406968	NM_021790	Cenpk	Mus musculus centromere protein K (Cenpk), transcript variant 1, mRNA.	-1.02419	0.0387826	0.877879	0.225082	21.9806	6	0	0	-1.90207	0	-1.06923	-1.06499	-1.03133	-1.01761	-0.980366	-0.981619	0.985382	0.596676	0.608539	1.01385	0.739579	1.14532	1.0558
15051	10495935	NM_197997	4930422G04Rik	Mus musculus RIKEN cDNA 4930422G04 gene (4930422G04Rik), mRNA.	-1.02406	0.130613	0.877768	0.195427	20.8762	10	0	0	-1.90183	0	-1.0494	-0.861758	-0.956847	-1.08762	-0.953186	-1.23556	1.21627	0.799223	0.599692	0.815186	0.780605	0.997495	0.9359
9671	10442331	NM_023058	Pkmyt1	Mus musculus protein kinase, membrane associated tyrosine/threonine 1 (Pkmyt1), mRNA.	-1.02401	0.122378	0.877721	0.200339	20.9631	10	0	0	-1.90173	0	-0.98862	-1.1019	-0.836577	-1.01686	-1.20207	-0.998019	0.81979	1.02316	0.730729	0.918334	1.16017	0.944084	0.547773
25413	10594774	NM_007630	Ccnb2	Mus musculus cyclin B2 (Ccnb2), mRNA.	-1.024	0.231089	0.877713	0.0902638	18.9563	6	0	0	-1.90171	0	-1.13302	-0.599828	-1.0056	-1.03853	-1.07448	-1.29253	0.745478	0.936059	0.839699	0.958803	0.779065	0.911926	0.972962
5723	10403980	---	---	cdna:genscan chromosome:NCBIM37:13:22135099:22143091:1 transcript_biotype:protein_coding	-1.02395	0.166258	0.877668	0.172671	20.1953	10	0	0	-1.90161	0	-1.06869	-0.700823	-1.11034	-1.00325	-1.15568	-1.1049	0.764824	1.14963	0.877061	0.786485	0.637084	0.890166	1.03843
21165	10555695	NM_009103	Rrm1	Mus musculus ribonucleotide reductase M1 (Rrm1), mRNA.	-1.02392	0.133215	0.877646	0.195346	20.7365	10	0	0	-1.90157	0	-1.11768	-1.0967	-1.13936	-1.04372	-0.785305	-0.960762	0.838577	0.830165	0.498768	1.07351	0.865988	1.06062	0.975892
25113	10591781	NM_028390	Anln	Mus musculus anillin, actin binding protein (Anln), mRNA.	-1.0239	0.217793	0.877631	0.116126	19.177	7	0	0	-1.90153	0	-1.23137	-1.01886	-1.21278	-1.08366	-0.635381	-0.961372	0.85336	0.786692	0.721333	0.933861	0.8165	0.980318	1.05135
13078	10476252	NM_023117	Cdc25b	Mus musculus cell division cycle 25B (Cdc25b), transcript variant 1, mRNA.	-1.0239	0.156526	0.87763	0.180563	20.3388	10	0	0	-1.90153	0	-1.03077	-0.898889	-0.831214	-0.981287	-1.25268	-1.14857	0.878386	0.775428	0.684227	1.1818	0.916847	0.691293	1.01543
23144	10571870	NM_008252	Hmgb2	Mus musculus high mobility group box 2 (Hmgb2), mRNA.	-1.02381	0.0827643	0.877552	0.218308	21.3246	7	0	0	-1.90136	0	-1.09187	-0.927845	-1.07526	-0.907997	-1.06317	-1.07672	0.801964	0.718972	0.583529	0.788612	0.934161	1.17254	1.14309
22314	10564978	NM_007550	Blm	Mus musculus Bloom syndrome, RecQ helicase-like (Blm), transcript variant 1, mRNA.	-1.02369	0.112804	0.877452	0.207862	20.8764	9	0	0	-1.90114	0	-1.07303	-1.10314	-1.02439	-1.09226	-0.801049	-1.04829	0.966255	0.622788	0.58063	0.944747	0.855232	1.14183	1.03068
4413	10390707	NM_011623	Top2a	Mus musculus topoisomerase (DNA) II alpha (Top2a), mRNA.	-1.02368	0.208954	0.877438	0.13223	19.2289	8	0	0	-1.90112	0	-1.00363	-0.663383	-1.1526	-1.04665	-0.988157	-1.28765	0.640414	0.892432	0.776288	0.959563	0.867867	0.998963	1.00654
13316	10478572	NM_026785	Ube2c	Mus musculus ubiquitin-conjugating enzyme E2C (Ube2c), mRNA.	-1.02357	0.183474	0.877349	0.161903	19.6535	10	0	0	-1.90092	0	-1.13839	-0.672212	-1.07043	-1.0634	-1.00723	-1.18979	0.609252	0.980187	0.788835	1.08395	0.906812	0.778316	0.994093
14227	10487930	NM_011045	Pcna	Mus musculus proliferating cell nuclear antigen (Pcna), mRNA.	-1.02357	0.133235	0.877345	0.198724	20.4979	10	0	0	-1.90091	0	-1.19324	-0.885464	-1.05557	-1.16222	-0.932586	-0.912341	0.854986	0.893326	0.502913	1.17586	0.86414	0.95785	0.892336
20304	10547943	NM_146171	Ncapd2	Mus musculus non-SMC condensin I complex, subunit D2 (Ncapd2), mRNA.	-1.02354	0.126728	0.877322	0.202492	20.5764	10	0	0	-1.90086	0	-1.16669	-0.829201	-1.07587	-0.927622	-1.01797	-1.1239	0.754545	1.0698	0.731403	0.929473	0.594268	0.884931	1.17683
8417	10429772	NM_144848	Eppk1	Mus musculus epiplakin 1 (Eppk1), mRNA.	-1.02342	0.169637	0.877216	0.175705	19.8086	10	0	0	-1.90064	0	-0.85563	-1.06142	-0.946522	-1.11212	-0.866141	-1.29868	0.651389	0.909091	0.636703	0.922718	0.970095	1.12734	0.923179
8293	10428561	NM_009009	Rad21	Mus musculus RAD21 homolog (S. pombe) (Rad21), mRNA.	-1.02341	0.092812	0.877212	0.218387	20.9265	8	0	0	-1.90063	0	-1.15539	-1.08336	-1.03818	-1.00911	-0.966788	-0.887658	0.776011	0.699595	0.528824	0.977753	0.942884	1.07369	1.14173
15403	10499366	NM_025928	Pmf1	Mus musculus polyamine-modulated factor 1 (Pmf1), mRNA.	-1.02333	0.191839	0.877142	0.156576	19.3604	9	0	0	-1.90047	0	-1.12791	-0.781447	-0.925876	-0.874475	-1.14685	-1.28343	0.852593	0.751893	0.614533	0.859974	1.0193	1.02501	1.01669
15870	10503617	NM_199467	Mms22l	Mus musculus MMS22-like, DNA repair protein (Mms22l), mRNA.	-1.02331	0.120028	0.877119	0.208036	20.5121	9	0	0	-1.90042	0	-1.11289	-1.04038	-1.10869	-1.11046	-0.813508	-0.953911	1.03159	0.555962	0.6366	0.937811	0.888954	1.13104	0.957883
11729	10462973	NM_008234	Hells	Mus musculus helicase, lymphoid specific (Hells), mRNA.	-1.02325	0.169309	0.877072	0.177784	19.7129	10	0	0	-1.90032	0	-1.14198	-1.06116	-1.16379	-1.14391	-0.758694	-0.869969	1.01469	0.573165	0.695006	0.873318	0.952662	0.990451	1.04021
10637	10451805	NM_028232	Sgol1	Mus musculus shugoshin-like 1 (S. pombe) (Sgol1), mRNA.	-1.02319	0.148223	0.877016	0.19348	20.0194	10	0	0	-1.9002	0	-0.948122	-0.802797	-1.07571	-0.976571	-1.23427	-1.10164	0.762827	0.786702	0.650138	0.92648	0.74559	1.11855	1.14882
13504	10480570	NM_001162485	Arrdc1	Mus musculus arrestin domain containing 1 (Arrdc1), transcript variant 1, mRNA.	-1.02317	0.133678	0.877005	0.202236	20.2317	10	0	0	-1.90018	0	-1.12874	-0.993593	-1.18188	-1.06152	-0.968513	-0.804801	1.07368	1.10281	0.669353	0.592533	0.970137	0.97189	0.758639
13441	10479811	NM_027290	Mcm10	Mus musculus minichromosome maintenance deficient 10 (S. cerevisiae) (Mcm10), mRNA.	-1.02312	0.161598	0.87696	0.185012	19.7644	10	0	0	-1.90008	0	-0.857029	-1.14633	-0.789511	-1.04343	-1.15253	-1.14988	0.77975	0.827411	0.52806	0.985272	0.924584	1.05111	1.04253
727	10352356	NM_027999	Haus5	Mus musculus HAUS augmin-like complex, subunit 5 (Haus5), mRNA.	-1.02312	0.0426237	0.876958	0.233425	21.1293	6	0	0	-1.90007	0	-1.04063	-0.956193	-1.06978	-1.02022	-1.05831	-0.993562	0.946615	0.94105	0.444501	0.964777	0.914408	1.19475	0.732603
2120	10367076	NM_008921	Prim1	Mus musculus DNA primase, p49 subunit (Prim1), mRNA.	-1.02311	0.0741529	0.876953	0.2268	20.9004	7	0	0	-1.90007	0	-1.05285	-0.961517	-1.14872	-1.03383	-0.943816	-0.997934	0.778604	0.717945	0.580547	0.874932	0.88066	1.28223	1.02376
4659	10393431	NM_009387	Tk1	Mus musculus thymidine kinase 1 (Tk1), mRNA.	-1.02311	0.157993	0.876953	0.187673	19.8183	10	0	0	-1.90006	0	-1.07018	-0.701589	-1.07805	-1.09446	-1.10527	-1.08913	0.864169	1.13044	0.587961	0.954781	0.898444	1.01812	0.684747
11705	10462632	NM_183046	Kif20b	Mus musculus kinesin family member 20B (Kif20b), mRNA.	-1.02302	0.0483047	0.876874	0.233297	21.0267	6	0	0	-1.89989	0	-1.03679	-0.999721	-1.08081	-1.05325	-0.941347	-1.02619	0.785135	0.630062	0.649818	1.01226	0.740202	1.09712	1.22352
15017	10495574	NM_028349	Sass6	Mus musculus spindle assembly 6 homolog (C. elegans) (Sass6), mRNA.	-1.02291	0.165944	0.876777	0.183995	19.5668	10	0	0	-1.89968	0	-1.15999	-0.96072	-1.18483	-1.15333	-0.792545	-0.88603	0.924333	0.582461	0.73049	0.849374	0.870581	1.11288	1.06732
786	10353004	NM_025415	Cks2	Mus musculus CDC28 protein kinase regulatory subunit 2 (Cks2), mRNA.	-1.02289	0.158236	0.876763	0.189726	19.6822	10	0	0	-1.89965	0	-1.18443	-0.893314	-1.20809	-1.08387	-0.936796	-0.830848	0.747358	0.938644	0.655387	1.11131	0.654647	0.97126	1.05874
11550	10461391	NM_011045	Pcna	Mus musculus proliferating cell nuclear antigen (Pcna), mRNA.	-1.02278	0.140824	0.876669	0.201879	19.8817	10	0	0	-1.89945	0	-1.2222	-0.866732	-1.04376	-1.14926	-0.913341	-0.941388	0.846007	0.951638	0.49292	1.16929	0.851082	0.942921	0.882825
6190	10408070	NM_178199	Hist1h2bl	Mus musculus histone cluster 1, H2bl (Hist1h2bl), mRNA.	-1.02266	0.190625	0.876564	0.165721	19.0115	10	0	0	-1.89922	0	-1.05179	-0.67119	-1.15766	-0.972374	-1.20599	-1.07694	0.767998	1.17497	0.878777	0.798006	0.667072	0.856454	0.992674
5875	10405185	NM_025415	Cks2	Mus musculus CDC28 protein kinase regulatory subunit 2 (Cks2), mRNA.	-1.02264	0.146321	0.876545	0.199968	19.714	10	0	0	-1.89918	0	-1.18017	-0.923131	-1.19461	-1.06105	-0.939665	-0.83718	0.762427	0.891475	0.633061	1.08526	0.649907	0.9958	1.11788
7895	10424779	NM_025415	Cks2	Mus musculus CDC28 protein kinase regulatory subunit 2 (Cks2), mRNA.	-1.02262	0.158574	0.876533	0.192164	19.5197	10	0	0	-1.89916	0	-1.22843	-0.894609	-1.19403	-1.00449	-0.979809	-0.834365	0.728205	1.01007	0.648994	1.04497	0.644133	1.01145	1.04791
5752	10404051	NM_175654	Hist1h4d	Mus musculus histone cluster 1, H4d (Hist1h4d), mRNA.	-1.02248	0.0893962	0.87641	0.227528	20.3261	8	0	0	-1.89889	0	-0.956542	-0.953095	-1.06257	-0.923116	-1.13364	-1.1059	0.513879	1.02954	0.764637	0.848931	0.889291	0.836992	1.2516
1002	10355327	NM_007525	Bard1	Mus musculus BRCA1 associated RING domain 1 (Bard1), mRNA.	-1.02232	0.107682	0.876274	0.222192	20.0292	8	0	0	-1.89859	0	-1.11094	-0.843927	-1.08555	-0.96088	-1.124	-1.00862	0.886673	0.613627	0.983244	1.16663	1.10771	0.62917	0.746854
8314	10428763	NM_027435	Atad2	Mus musculus ATPase family, AAA domain containing 2 (Atad2), mRNA.	-1.02224	0.172086	0.876207	0.186145	19.094	10	0	0	-1.89845	0	-1.17092	-1.01925	-1.16739	-1.14808	-0.780402	-0.847408	0.854522	0.745654	0.575774	1.07613	0.811875	1.08836	0.981137
14633	10491805	NM_011495	Plk4	Mus musculus polo-like kinase 4 (Plk4), transcript variant 1, mRNA.	-1.02219	0.0626358	0.876162	0.237187	20.3634	6	0	0	-1.89835	0	-1.03627	-0.953909	-1.07722	-1.01998	-0.946323	-1.09944	0.972888	0.64522	0.513989	0.875518	0.925613	0.95664	1.24326
24131	10582190	ENSMUST00000034278	Gins2	cdna:known chromosome:NCBIM37:8:123102533:123113204:-1 gene:ENSMUSG00000031821 gene_biotype:protein_coding transcript_biotype:protein_coding	-1.0221	0.128862	0.876088	0.214515	19.6397	9	0	0	-1.89819	0	-1.05677	-0.818972	-1.03601	-1.03112	-0.973011	-1.21672	0.781967	0.616235	0.662072	0.873649	1.20918	1.08077	0.908742
14194	10487577	NM_181589	Ckap2l	Mus musculus cytoskeleton associated protein 2-like (Ckap2l), mRNA.	-1.02208	0.159868	0.876069	0.196576	19.1939	10	0	0	-1.89815	0	-1.02209	-0.880094	-0.982215	-0.834586	-1.17014	-1.24335	0.568847	0.829673	0.710971	0.96288	0.862253	1.12126	1.0766
6336	10409190	NM_025495	Cenpp	Mus musculus centromere protein P (Cenpp), mRNA.	-1.02199	0.0792616	0.875989	0.234639	20.1048	7	0	0	-1.89798	0	-1.03672	-0.902483	-0.966677	-1.12409	-1.02142	-1.08054	0.823022	0.601174	0.665104	1.13081	0.699576	1.15882	1.05342
11230	10458195	NM_009860	Cdc25c	Mus musculus cell division cycle 25C (Cdc25c), mRNA.	-1.02198	0.0450776	0.875981	0.242147	20.3306	6	0	0	-1.89796	0	-0.946813	-1.00687	-1.0147	-1.0808	-1.03827	-1.04441	0.761813	0.81971	0.594847	0.947472	0.64792	1.09481	1.26529
13194	10477187	NM_001141977	Tpx2	Mus musculus TPX2, microtubule-associated protein homolog (Xenopus laevis) (Tpx2), transcript variant 1, mRNA.	-1.02188	0.120054	0.875896	0.220667	19.6175	9	0	0	-1.89777	0	-1.14755	-0.836738	-1.15935	-0.997648	-0.971956	-1.01802	0.573	0.857355	0.665684	1.00623	0.783011	1.05914	1.18685
22811	10568714	NM_001081117	Mki67	Mus musculus antigen identified by monoclonal antibody Ki 67 (Mki67), mRNA.	-1.02175	0.25705	0.875786	0.0782882	17.4034	5	0	0	-1.89754	0	-0.981804	-0.573875	-1.16382	-1.02054	-1.04063	-1.34984	0.804855	0.880678	0.768148	0.907132	0.839597	0.934175	0.995918
19027	10535979	NM_027009	Rfc3	Mus musculus replication factor C (activator 1) 3 (Rfc3), mRNA.	-1.0216	0.226626	0.875661	0.137636	17.8748	7	0	0	-1.89727	0	-1.00186	-0.834243	-1.14942	-0.750409	-1.00977	-1.38393	0.933701	0.872136	0.586677	0.936918	1.00573	0.948076	0.846394
14321	10488785	NM_007891	E2f1	Mus musculus E2F transcription factor 1 (E2f1), mRNA.	-1.0216	0.13185	0.875657	0.217434	19.3122	10	0	0	-1.89726	0	-1.20111	-0.926082	-1.17435	-0.899051	-0.983269	-0.945735	1.01072	0.786235	0.444081	0.897249	0.962107	1.12555	0.903655
14353	10489078	NM_025853	Dsn1	Mus musculus DSN1, MIND kinetochore complex component, homolog (S. cerevisiae) (Dsn1), mRNA.	-1.02159	0.123013	0.875652	0.22175	19.4176	9	0	0	-1.89725	0	-1.12799	-0.982166	-1.07816	-1.08767	-0.790326	-1.06325	0.856773	0.748959	0.538339	1.13042	0.723804	1.01716	1.11411
3712	10383436	NM_026877	Aspscr1	Mus musculus alveolar soft part sarcoma chromosome region, candidate 1 (human) (Aspscr1), transcript variant 1, mRNA.	-1.02154	0.121059	0.875604	0.223127	19.4084	9	0	0	-1.89714	0	-1.11425	-1.08517	-0.816396	-0.929748	-1.10281	-1.08085	0.769926	0.830887	0.63486	1.29291	1.02749	0.701372	0.871778
11965	10465638	NM_027643	Naa40	Mus musculus N(alpha)-acetyltransferase 40, NatD catalytic subunit, homolog (S. cerevisiae) (Naa40), mRNA.	-1.02151	0.195634	0.87558	0.173815	18.3444	10	0	0	-1.89709	0	-1.15047	-0.991286	-1.30853	-1.04993	-0.765108	-0.863739	0.994325	0.813369	0.722761	0.92039	0.969232	1.10775	0.601234
4809	10394978	NM_009104	Rrm2	Mus musculus ribonucleotide reductase M2 (Rrm2), mRNA.	-1.02131	0.171875	0.875411	0.195533	18.612	10	0	0	-1.89672	0	-1.09236	-0.693512	-1.18986	-1.09945	-1.04422	-1.00847	0.766033	0.706983	0.740738	0.986812	1.05006	0.693654	1.1836
7383	10419296	NM_172598	Wdhd1	Mus musculus WD repeat and HMG-box DNA binding protein 1 (Wdhd1), mRNA.	-1.02131	0.127072	0.875409	0.222268	19.21	9	0	0	-1.89672	0	-1.02303	-0.896515	-0.953902	-0.90947	-1.13778	-1.20717	0.857275	0.939477	0.514641	0.872874	0.702126	1.19633	1.04515
13728	10483401	NM_001199123	Spc25	Mus musculus SPC25, NDC80 kinetochore complex component, homolog (S. cerevisiae) (Spc25), transcript variant 1, mRNA.	-1.02114	0.16972	0.875265	0.198727	18.5578	10	0	0	-1.89641	0	-1.31585	-0.920077	-0.902049	-1.00565	-0.867539	-1.11568	0.827979	0.872271	0.556056	1.10017	0.699621	1.02799	1.04277
10034	10446027	NM_013733	Chaf1a	Mus musculus chromatin assembly factor 1, subunit A (p150) (Chaf1a), mRNA.	-1.02105	0.0996659	0.875187	0.23572	19.3602	8	0	0	-1.89624	0	-0.8603	-1.02043	-1.00521	-1.17277	-1.04453	-1.02307	0.811249	0.765909	0.492959	0.901363	0.850556	1.24313	1.06114
3886	10385248	NM_013552	Hmmr	Mus musculus hyaluronan mediated motility receptor (RHAMM) (Hmmr), mRNA.	-1.02095	0.0456283	0.875098	0.250007	19.6864	6	0	0	-1.89604	0	-1.0447	-0.970572	-1.05068	-1.08439	-0.978075	-0.997265	0.672204	0.779623	0.609331	1.15573	0.655262	1.11353	1.14
21034	10554281	NM_145946	Fanci	Mus musculus Fanconi anemia, complementation group I (Fanci), mRNA.	-1.02091	0.118195	0.875062	0.229681	19.0894	9	0	0	-1.89597	0	-0.896374	-0.86054	-1.01822	-1.14316	-1.1021	-1.10503	1.0016	0.951404	0.538289	1.1555	0.681278	1.0775	0.719867
22983	10570556	ENSMUST00000039412	Mcph1	cdna:known chromosome:NCBIM37:8:18595131:18803189:1 gene:ENSMUSG00000039842 gene_biotype:protein_coding transcript_biotype:protein_coding	-1.02083	0.182092	0.875001	0.192447	18.2283	10	0	0	-1.89583	0	-1.16978	-1.01153	-1.28706	-0.991353	-0.8543	-0.810982	0.905736	0.528861	0.689917	0.985474	0.953247	1.0426	1.01917
16433	10509063	NM_178257	Il22ra1	Mus musculus interleukin 22 receptor, alpha 1 (Il22ra1), mRNA.	-1.02078	0.0955258	0.874957	0.239282	19.248	8	0	0	-1.89574	0	-1.00754	-0.885101	-1.08703	-0.969296	-1.01371	-1.16203	0.576366	0.600248	1.22658	0.787107	1.01287	0.877663	1.04386
24724	10587508	NM_009445	Ttk	Mus musculus Ttk protein kinase (Ttk), transcript variant 1, mRNA.	-1.02064	0.0295851	0.874836	0.254298	19.5669	6	0	0	-1.89548	0	-1.01733	-0.963271	-1.04383	-1.03786	-1.02663	-1.03492	0.778756	0.892056	0.499839	1.05036	0.621061	1.16408	1.1177
4297	10389395	NM_178309	Brip1	Mus musculus BRCA1 interacting protein C-terminal helicase 1 (Brip1), mRNA.	-1.02051	0.0950021	0.874723	0.241603	19.1028	8	0	0	-1.89523	0	-1.03236	-1.07595	-1.04016	-1.08625	-0.831146	-1.0572	0.789559	0.730645	0.530609	1.0858	0.75737	1.23794	0.991137
5722	10403978	ENSMUST00000110452 // ENSMUST00000110452 // ENSMUST00000110452 // ENSMUST00000110452	Hist1h2bn // Hist1h2bl // Hist1h2bj // Hist1h2bf	cdna:known chromosome:NCBIM37:13:22135083:22135545:1 gene:ENSMUSG00000069300 gene_biotype:protein_coding transcript_biotype:protein_coding	-1.02038	0.200222	0.874614	0.181577	17.7549	10	0	0	-1.895	0	-1.03154	-0.671193	-1.14226	-0.958792	-1.26213	-1.05639	0.756264	1.20314	0.862302	0.791453	0.638764	0.881086	0.989288
21982	10562818	NM_011131	Pold1	Mus musculus polymerase (DNA directed), delta 1, catalytic subunit (Pold1), mRNA.	-1.02037	0.176742	0.874606	0.200951	18.0885	10	0	0	-1.89498	0	-0.929671	-0.921005	-0.980971	-0.87076	-1.06449	-1.35534	0.784715	1.00664	0.696904	1.02256	0.591184	1.16219	0.858052
24798	10588294	ENSMUST00000035164	Topbp1	cdna:known chromosome:NCBIM37:9:103207545:103252762:1 gene:ENSMUSG00000032555 gene_biotype:protein_coding transcript_biotype:protein_coding	-1.02032	0.167811	0.874556	0.207761	18.1832	10	0	0	-1.89487	0	-1.23534	-0.986393	-1.1759	-1.04323	-0.79563	-0.885405	1.05812	0.577397	0.606217	0.987693	0.942953	1.09186	0.857661
9180	10437945	NM_008565	Mcm4	Mus musculus minichromosome maintenance deficient 4 homolog (S. cerevisiae) (Mcm4), mRNA.	-1.02013	0.201084	0.8744	0.183383	17.6334	10	0	0	-1.89453	0	-1.14517	-1.00041	-1.30289	-1.00097	-0.698232	-0.973121	0.99539	0.575305	0.685955	0.875923	1.07046	1.02762	0.890136
25132	10592001	NM_011176	St14	Mus musculus suppression of tumorigenicity 14 (colon carcinoma) (St14), mRNA.	-1.02004	0.186986	0.874316	0.196365	17.7924	10	0	0	-1.89435	0	-1.10766	-1.29134	-1.08974	-1.00487	-0.774765	-0.851838	0.522458	0.779604	0.823503	0.954076	1.11082	1.05788	0.871864
753	10352709	NM_198654	Nsl1	Mus musculus NSL1, MIND kinetochore complex component, homolog (S. cerevisiae) (Nsl1), mRNA.	-1.01999	0.0845869	0.874274	0.248836	18.9066	7	0	0	-1.89426	0	-1.03814	-0.954641	-0.948103	-1.15178	-0.948213	-1.07904	0.827951	0.922079	0.409851	0.9489	0.789281	1.22624	0.995612
15430	10499639	NM_016904	Cks1b	Mus musculus CDC28 protein kinase 1b (Cks1b), mRNA.	-1.01989	0.172635	0.874188	0.208391	17.9205	10	0	0	-1.89407	0	-1.02457	-0.896399	-1.2625	-1.10887	-0.764622	-1.06235	0.78	0.742651	0.615885	0.877304	0.834787	1.01036	1.25833
6231	10408210	NM_178195	Hist1h2bf	Mus musculus histone cluster 1, H2bf (Hist1h2bf), mRNA.	-1.01988	0.222808	0.874179	0.164102	17.2038	9	0	0	-1.89406	0	-1.05598	-0.61178	-1.1581	-0.939589	-1.22937	-1.12444	0.76645	1.16166	0.848197	0.794104	0.661127	0.893173	0.994548
1234	10358027	NM_001163131	Elf3	Mus musculus E74-like factor 3 (Elf3), transcript variant 1, mRNA.	-1.01974	0.236388	0.874062	0.149169	16.9441	8	0	0	-1.8938	0	-1.19816	-1.30591	-1.05388	-0.870852	-1.04624	-0.643392	0.858634	1.10409	0.779475	0.8879	1.00702	0.645925	0.835392
6492	10410560	NM_027182	Trip13	Mus musculus thyroid hormone receptor interactor 13 (Trip13), mRNA.	-1.01964	0.0909751	0.873975	0.249605	18.6766	7	0	0	-1.89361	0	-0.964703	-0.894194	-1.11963	-1.12409	-0.980879	-1.03432	0.845759	0.578842	0.514928	0.932922	0.967324	1.09261	1.18544
15076	10496204	NM_173762	Cenpe	Mus musculus centromere protein E (Cenpe), mRNA.	-1.01959	0.0986857	0.873934	0.24752	18.5895	8	0	0	-1.89352	0	-1.13569	-0.83821	-1.01015	-1.04888	-1.02931	-1.0553	0.606819	0.846886	0.709787	0.914828	0.663066	1.07613	1.30002
13166	10476989	NM_027014	Gins1	Mus musculus GINS complex subunit 1 (Psf1 homolog) (Gins1), transcript variant 1, mRNA.	-1.01953	0.0574897	0.873885	0.258544	18.8401	6	0	0	-1.89342	0	-1.06508	-0.960539	-1.01538	-0.986966	-0.978908	-1.11032	0.864695	0.419535	0.734259	0.818415	0.988902	1.21983	1.07156
17643	10521136	ENSMUST00000139845	Whsc1	cdna:known chromosome:NCBIM37:5:34185761:34240624:1 gene:ENSMUSG00000057406 gene_biotype:protein_coding transcript_biotype:nonsense_mediated_decay	-1.01952	0.18239	0.873874	0.20476	17.6301	10	0	0	-1.89339	0	-1.25911	-1.04313	-1.04463	-1.15416	-0.816992	-0.799089	0.937294	0.581282	0.617251	0.860557	1.01924	1.12884	0.972651
28038	10495945	---	---	---	-1.01946	0.0874634	0.873822	0.251996	18.6129	7	0	0	-1.89328	0	-1.02556	-1.05567	-0.988059	-1.16176	-0.898523	-0.987193	1.19127	0.531517	0.580082	0.80356	0.896836	1.10363	1.00986
21359	10557156	NM_011121	Plk1	Mus musculus polo-like kinase 1 (Plk1), mRNA.	-1.01936	0.201003	0.873734	0.191303	17.309	10	0	0	-1.89309	0	-1.10497	-0.699634	-1.28725	-1.12329	-0.936158	-0.964846	0.542799	1.02347	0.870413	0.925137	0.721765	0.913183	1.11937
9518	10440794	NM_025642	2610039C10Rik	Mus musculus RIKEN cDNA 2610039C10 gene (2610039C10Rik), mRNA.	-1.01913	0.14825	0.873544	0.229762	17.8805	10	0	0	-1.89268	0	-1.27278	-0.908605	-1.12274	-0.961461	-0.951157	-0.898065	1.01177	0.536633	0.572738	0.885387	1.03043	1.12315	0.954698
14711	10492558	NM_133786	Smc4	Mus musculus structural maintenance of chromosomes 4 (Smc4), mRNA.	-1.0191	0.195931	0.873513	0.198118	17.2732	10	0	0	-1.89261	0	-1.30821	-1.0314	-1.14521	-1.02108	-0.809882	-0.798807	0.828106	0.649676	0.669708	0.928913	0.809705	1.01739	1.2111
2725	10373530	NM_183417	Cdk2	Mus musculus cyclin-dependent kinase 2 (Cdk2), transcript variant 1, mRNA.	-1.01909	0.181816	0.873508	0.209085	17.4563	10	0	0	-1.8926	0	-1.12995	-1.07886	-1.22991	-1.04758	-0.713772	-0.914472	0.903663	0.629659	0.561056	0.952847	1.12893	1.0542	0.884197
3203	10378053	NM_144526	Fam64a	Mus musculus family with sequence similarity 64, member A (Fam64a), mRNA.	-1.01904	0.184827	0.873459	0.207399	17.3935	10	0	0	-1.89249	0	-1.18994	-0.815491	-0.863187	-1.24634	-0.891328	-1.10792	0.705588	1.0866	0.654402	0.958356	0.622951	1.10999	0.97632
6590	10411728	NM_021886	Cenph	Mus musculus centromere protein H (Cenph), mRNA.	-1.01894	0.0627157	0.873375	0.26187	18.5094	6	0	0	-1.89231	0	-0.972591	-1.04988	-1.09474	-0.933637	-0.991207	-1.07157	0.979197	0.464027	0.565869	1.11266	0.85486	1.1153	1.02171
9097	10437040	NM_028083	Chaf1b	Mus musculus chromatin assembly factor 1, subunit B (p60) (Chaf1b), mRNA.	-1.01885	0.243632	0.873303	0.150683	16.5089	8	0	0	-1.89216	0	-0.776643	-0.840875	-0.953439	-0.919323	-1.20879	-1.41405	0.972411	0.867134	0.588533	0.771363	1.01636	0.987805	0.909518
19937	10544732	NM_018773	Skap2	Mus musculus src family associated phosphoprotein 2 (Skap2), mRNA.	-1.0188	0.192082	0.873258	0.20402	17.2037	10	0	0	-1.89206	0	-1.07235	-0.812485	-1.17559	-1.21281	-0.750649	-1.08892	0.876377	0.929702	0.740415	0.784741	1.2553	0.603674	0.922594
24811	10588482	NM_027354	Poc1a	Mus musculus POC1 centriolar protein homolog A (Chlamydomonas) (Poc1a), mRNA.	-1.01874	0.150531	0.873205	0.231773	17.6804	10	0	0	-1.89194	0	-1.12531	-0.921318	-1.19191	-0.936965	-1.12772	-0.809219	0.697832	1.00733	0.434318	1.01329	1.03541	1.06009	0.864155
7261	10417829	NM_134081	Dnajc9	Mus musculus DnaJ (Hsp40) homolog, subfamily C, member 9 (Dnajc9), mRNA.	-1.01869	0.058471	0.873162	0.264464	18.4089	6	0	0	-1.89185	0	-0.984241	-1.01886	-1.11258	-0.951736	-1.0583	-0.986428	0.934737	0.90332	0.317753	0.966834	0.94127	1.17819	0.870033
6662	10412559	NM_009193	Slbp	Mus musculus stem-loop binding protein (Slbp), mRNA.	-1.01863	0.0968876	0.873112	0.25532	18.1386	7	0	0	-1.89174	0	-1.15751	-1.01161	-0.969361	-1.04021	-0.868362	-1.06474	0.663696	0.84083	0.41364	1.03549	0.971369	1.12547	1.06129
17119	10515744	NM_023223	Cdc20	Mus musculus cell division cycle 20 (Cdc20), mRNA.	-1.01853	0.184377	0.873024	0.212304	17.1925	10	0	0	-1.89155	0	-1.01059	-0.693943	-1.06138	-0.962884	-1.19124	-1.19114	0.587911	0.939042	0.734973	0.860234	0.749726	0.999794	1.23949
2129	10367179	NM_001136082	Timeless	Mus musculus timeless homolog (Drosophila) (Timeless), transcript variant 1, mRNA.	-1.01846	0.119794	0.872968	0.248376	17.8685	8	0	0	-1.89143	0	-1.11406	-1.03656	-0.84862	-0.890513	-1.10264	-1.11838	0.737744	0.638249	0.622256	0.8785	0.87775	1.33241	1.02387
13417	10479560	NM_001001882	Rtel1	Mus musculus regulator of telomere elongation helicase 1 (Rtel1), transcript variant 1, mRNA.	-1.0184	0.0845703	0.872911	0.260652	18.1174	7	0	0	-1.89131	0	-1.07744	-0.960922	-1.07386	-0.963358	-0.910477	-1.12431	0.823013	0.755479	0.431421	0.963797	0.84287	1.28318	1.01062
21809	10561085	ENSMUST00000043765	Hnrnpul1	cdna:known chromosome:NCBIM37:7:26506517:26539749:-1 gene:ENSMUSG00000040725 gene_biotype:protein_coding transcript_biotype:protein_coding	-1.01828	0.203088	0.872812	0.199912	16.8583	10	0	0	-1.89109	0	-1.18494	-1.1646	-1.1291	-1.10657	-0.816325	-0.708154	0.596681	0.810492	0.632861	0.905409	1.02352	1.08159	1.05913
10482	10450519	NM_001163763	Tcf19	Mus musculus transcription factor 19 (Tcf19), transcript variant 1, mRNA.	-1.01825	0.235876	0.872787	0.167576	16.4069	8	0	0	-1.89104	0	-1.00108	-0.840333	-1.11551	-0.942565	-0.77638	-1.43364	0.787665	1.0561	0.602829	0.911987	0.920843	1.0689	0.761182
16065	10505326	NM_019492	Rgs3	Mus musculus regulator of G-protein signaling 3 (Rgs3), transcript variant 1, mRNA.	-1.01813	0.146988	0.872683	0.238539	17.4585	10	0	0	-1.89081	0	-1.14968	-0.80181	-0.930146	-0.953254	-1.09368	-1.18021	0.64525	1.12934	0.600638	1.24403	0.769509	0.838408	0.881605
7940	10425207	NM_008197	H1f0	Mus musculus H1 histone family, member 0 (H1f0), mRNA.	-1.01811	0.195687	0.872668	0.207513	16.8888	10	0	0	-1.89078	0	-1.12509	-1.09256	-1.19236	-0.842261	-0.707945	-1.14845	0.868688	0.743504	0.553302	0.737045	1.13157	1.03197	1.0426
523	10350392	NM_009791	Aspm	Mus musculus asp (abnormal spindle)-like, microcephaly associated (Drosophila) (Aspm), mRNA.	-1.01808	0.0708835	0.87264	0.26629	18.054	6	0	0	-1.89072	0	-1.0358	-0.923526	-0.96302	-1.01789	-1.03877	-1.12947	0.657694	0.914432	0.72681	0.993367	0.481732	1.07974	1.2547
2557	10371591	NM_029249	4930547N16Rik	Mus musculus RIKEN cDNA 4930547N16 gene (4930547N16Rik), mRNA.	-1.01802	0.0688141	0.87259	0.267151	18.0387	6	0	0	-1.89061	0	-0.920191	-1.04267	-0.97535	-1.00337	-1.04489	-1.12166	0.510147	0.815179	0.708251	1.07334	0.658829	1.20457	1.13781
18279	10528077	NM_013726	Dbf4	Mus musculus DBF4 homolog (S. cerevisiae) (Dbf4), transcript variant 1, mRNA.	-1.01794	0.216174	0.87252	0.191531	16.5619	10	0	0	-1.89046	0	-1.25333	-1.04097	-1.22283	-1.04902	-0.849961	-0.691518	0.890846	0.600891	0.705201	1.00384	0.890604	0.829745	1.18651
15205	10497503	NM_010655	Kpna2	Mus musculus karyopherin (importin) alpha 2 (Kpna2), mRNA.	-1.01776	0.151754	0.872363	0.239008	17.2551	10	0	0	-1.89012	0	-1.11841	-0.950253	-1.17717	-1.09946	-0.756609	-1.00464	0.458568	0.914151	0.721102	1.02016	0.807481	0.983252	1.20183
5226	10399178	NM_146040	Cdca7l	Mus musculus cell division cycle associated 7 like (Cdca7l), mRNA.	-1.01773	0.206339	0.872341	0.202321	16.6131	10	0	0	-1.89007	0	-1.02145	-1.05046	-1.31476	-1.08463	-0.678003	-0.957089	1.07832	0.858722	0.579423	0.911001	0.70702	1.16279	0.809105
14356	10489127	NM_011249	Rbl1	Mus musculus retinoblastoma-like 1 (p107) (Rbl1), transcript variant 1, mRNA.	-1.01762	0.193934	0.872247	0.213272	16.7263	10	0	0	-1.88987	0	-1.26666	-1.00725	-1.09485	-1.1478	-0.836565	-0.752606	0.994014	0.589131	0.599308	1.07762	0.888642	1.11708	0.83994
4351	10390050	NM_177752	Eme1	Mus musculus essential meiotic endonuclease 1 homolog 1 (S. pombe) (Eme1), mRNA.	-1.01728	0.147738	0.871951	0.244835	17.1035	10	0	0	-1.88923	0	-0.963854	-0.862953	-0.929554	-0.956412	-1.25699	-1.1339	0.504533	0.840564	0.671558	0.987365	0.795176	1.21222	1.09225
6228	10408200	NM_175655	Hist1h4f	Mus musculus histone cluster 1, H4f (Hist1h4f), mRNA.	-1.0171	0.185255	0.871798	0.224071	16.6357	10	0	0	-1.8889	0	-1.1204	-0.733699	-0.873912	-1.00031	-1.21877	-1.1555	0.666972	1.13829	0.743645	0.745919	0.750687	0.813823	1.24326
6192	10408074	NM_178211	Hist1h4k	Mus musculus histone cluster 1, H4k (Hist1h4k), mRNA.	-1.01707	0.206228	0.871778	0.208457	16.3808	10	0	0	-1.88885	0	-1.06302	-0.822436	-1.01984	-0.733614	-1.22433	-1.23921	0.607401	1.1667	0.786216	0.755601	0.722979	0.962153	1.1014
23537	10576140	NM_026014	Cdt1	Mus musculus chromatin licensing and DNA replication factor 1 (Cdt1), mRNA.	-1.01704	0.227506	0.871746	0.189483	16.1043	9	0	0	-1.88878	0	-0.920428	-0.881516	-0.907678	-0.811826	-1.17295	-1.40783	1.12672	0.735363	0.653071	0.855851	1.10675	0.915758	0.708716
5531	10402073	NM_030172	2610021K21Rik	Mus musculus RIKEN cDNA 2610021K21 gene (2610021K21Rik), mRNA.	-1.01691	0.0893031	0.871636	0.269956	17.4298	7	0	0	-1.88855	0	-0.85184	-1.04261	-1.04599	-1.10572	-0.988895	-1.0664	0.759946	0.877185	0.387518	1.18188	0.799653	1.16382	0.931456
25065	10591369	NM_001199431	Dnmt1	Mus musculus DNA methyltransferase (cytosine-5) 1 (Dnmt1), transcript variant 1, mRNA.	-1.01684	0.151484	0.871581	0.246257	16.8989	10	0	0	-1.88843	0	-1.15346	-0.816024	-0.951277	-1.06586	-0.905923	-1.20851	0.740002	0.855628	0.485811	0.831114	0.946014	1.30239	0.94011
8434	10430032	NM_183091	Tonsl	Mus musculus tonsoku-like, DNA repair protein (Tonsl), mRNA.	-1.01683	0.135062	0.871564	0.254237	17.045	9	0	0	-1.88839	0	-1.04573	-1.07441	-1.20009	-0.817606	-1.0567	-0.90641	0.444663	0.690668	0.829768	1.03729	0.825895	1.16229	1.11038
12955	10474769	NM_009773	Bub1b	Mus musculus budding uninhibited by benzimidazoles 1 homolog, beta (S. cerevisiae) (Bub1b), mRNA.	-1.0168	0.0950104	0.871547	0.269061	17.3496	7	0	0	-1.88835	0	-1.09585	-0.892109	-1.03383	-0.912493	-1.04246	-1.12408	0.474093	0.874321	0.783361	0.971132	0.628019	1.1466	1.2233
24696	10587150	NM_001081322	Myo5c	Mus musculus myosin VC (Myo5c), mRNA.	-1.01672	0.206435	0.871473	0.211495	16.2554	10	0	0	-1.88819	0	-1.12399	-1.05949	-1.29125	-1.01439	-0.672891	-0.938296	0.834327	1.03897	1.13704	0.85793	0.999244	0.720773	0.512027
18253	10527801	NM_001081001	Brca2	Mus musculus breast cancer 2 (Brca2), transcript variant 1, mRNA.	-1.01669	0.15247	0.871445	0.246968	16.829	10	0	0	-1.88813	0	-1.12963	-1.00881	-1.07316	-1.16017	-0.735491	-0.992847	1.17998	0.668222	0.662163	0.951711	0.878966	1.17874	0.580341
716	10352267	NM_001103182	Lin9	Mus musculus lin-9 homolog (C. elegans) (Lin9), transcript variant 1, mRNA.	-1.01663	0.172211	0.871398	0.236341	16.6088	10	0	0	-1.88803	0	-1.15545	-1.08502	-1.13858	-1.12676	-0.776415	-0.817556	0.925681	0.539413	0.571146	0.934934	0.907617	1.03257	1.18842
5513	10401852	NM_181815	4930534B04Rik	Mus musculus RIKEN cDNA 4930534B04 gene (4930534B04Rik), mRNA.	-1.01652	0.136561	0.871299	0.255865	16.9118	9	0	0	-1.88781	0	-1.12388	-0.9896	-1.17707	-1.04379	-0.786244	-0.978504	1.0264	0.581043	0.632503	1.07554	0.896113	1.23925	0.648243
15151	10497122	NM_001172092	Depdc1a	Mus musculus DEP domain containing 1a (Depdc1a), transcript variant 1, mRNA.	-1.01638	0.0627289	0.871186	0.279687	17.3539	6	0	0	-1.88757	0	-1.08361	-0.929296	-1.03273	-1.07182	-0.952461	-1.02839	0.880059	0.557677	0.640341	0.963096	0.680724	0.998507	1.3779
23118	10571680	NM_027973	Mlf1ip	Mus musculus myeloid leukemia factor 1 interacting protein (Mlf1ip), mRNA.	-1.01634	0.137787	0.87115	0.256599	16.8349	9	0	0	-1.88749	0	-1.00159	-0.85021	-1.0811	-0.880781	-1.22239	-1.06198	1.10118	0.570904	0.455718	0.931482	0.954554	1.1141	0.970112
8020	10426016	NM_013882	Gtse1	Mus musculus G two S phase expressed protein 1 (Gtse1), transcript variant 2, mRNA.	-1.01631	0.123521	0.871122	0.262818	16.9425	8	0	0	-1.88743	0	-1.08659	-1.16319	-1.11442	-0.974244	-0.856753	-0.902649	0.584771	1.00652	0.463538	1.09125	0.849104	1.18189	0.920773
17179	10516246	NM_026560	Cdca8	Mus musculus cell division cycle associated 8 (Cdca8), mRNA.	-1.01629	0.109968	0.87111	0.267889	17.0407	8	0	0	-1.8874	0	-1.10496	-0.879411	-1.15767	-0.923002	-1.06722	-0.965497	0.742133	0.747753	0.585596	0.883052	0.768083	0.952461	1.41869
16960	10514340	NM_001040654	Cdkn2a	Mus musculus cyclin-dependent kinase inhibitor 2A (Cdkn2a), transcript variant 2, mRNA.	-1.01629	0.148247	0.871104	0.252095	16.7205	9	0	0	-1.88739	0	-1.06143	-0.932825	-0.819644	-0.936408	-1.11773	-1.22969	0.71247	0.62582	0.546225	1.01754	0.873037	1.17777	1.14487
5759	10404067	NM_178193	Hist1h4b	Mus musculus histone cluster 1, H4b (Hist1h4b), mRNA.	-1.01628	0.220945	0.871096	0.203026	15.9372	10	0	0	-1.88738	0	-1.02874	-0.790876	-0.983628	-0.767182	-1.20179	-1.32546	0.622417	1.13818	0.768619	0.758587	0.725698	0.966697	1.11747
3549	10381548	NM_153544	BC030867	Mus musculus cDNA sequence BC030867 (BC030867), mRNA.	-1.01626	0.0935087	0.871084	0.273255	17.1406	7	0	0	-1.88735	0	-1.07107	-0.867928	-1.0653	-0.977622	-1.1332	-0.982475	0.728055	0.581962	0.520558	1.18455	0.920129	1.20797	0.954366
4569	10392284	NM_010655	Kpna2	Mus musculus karyopherin (importin) alpha 2 (Kpna2), mRNA.	-1.01625	0.172585	0.871068	0.239174	16.4667	10	0	0	-1.88731	0	-1.10895	-0.914209	-1.24188	-1.10097	-0.750563	-0.980915	0.448118	0.917882	0.72073	0.965761	0.844208	0.989296	1.21148
6028	10406581	NM_010049	Dhfr	Mus musculus dihydrofolate reductase (Dhfr), mRNA.	-1.01624	0.142569	0.871064	0.255157	16.7548	9	0	0	-1.8873	0	-1.09506	-0.939299	-1.25902	-1.01184	-0.867157	-0.925077	1.0114	0.639936	0.393226	1.05688	0.966537	1.0609	0.968566
25157	10592201	NM_007691	Chek1	Mus musculus checkpoint kinase 1 (Chek1), mRNA.	-1.01608	0.104439	0.870928	0.271203	16.9972	7	0	0	-1.88701	0	-1.09465	-1.02802	-1.15307	-1.00365	-0.852973	-0.964141	0.707126	0.547838	0.837307	0.908287	0.702743	1.37984	1.01336
565	10350838	NM_026515	2810417H13Rik	Mus musculus RIKEN cDNA 2810417H13 gene (2810417H13Rik), mRNA.	-1.01593	0.249175	0.870799	0.177391	15.4862	8	0	0	-1.88673	0	-1.11122	-0.54159	-1.06929	-1.07282	-1.281	-1.01967	0.665408	1.03984	0.610028	0.952236	0.823366	1.05956	0.945153
9105	10437160	NM_011809	Ets2	Mus musculus E26 avian leukemia oncogene 2, 3' domain (Ets2), mRNA.	-1.01568	0.220302	0.870583	0.209087	15.7549	10	0	0	-1.88626	0	-1.25003	-1.21093	-1.07321	-0.952547	-0.965601	-0.641759	1.09007	0.77218	0.456708	0.979955	1.00882	0.916238	0.870118
16735	10512236	NM_024241	Kif24	Mus musculus kinesin family member 24 (Kif24), mRNA.	-1.01556	0.0675941	0.870479	0.284273	17.0017	6	0	0	-1.88604	0	-1.01168	-1.0106	-0.998374	-1.01859	-0.921612	-1.1325	0.625198	0.695479	0.566679	0.928934	0.777475	1.28111	1.21848
862	10353733	NM_008922	Prim2	Mus musculus DNA primase, p58 subunit (Prim2), mRNA.	-1.01555	0.149464	0.870475	0.256945	16.4439	9	0	0	-1.88603	0	-1.09581	-0.781131	-1.13136	-1.0687	-0.877857	-1.13846	0.74133	1.0374	0.507969	0.83307	0.849052	1.33128	0.793212
14639	10491860	NM_172303	Phf17	Mus musculus PHD finger protein 17 (Phf17), transcript variant 1, mRNA.	-1.01547	0.113985	0.870402	0.272269	16.6979	8	0	0	-1.88587	0	-1.12438	-1.11018	-1.11868	-0.947309	-0.909402	-0.882866	0.741352	0.715822	0.54154	0.729709	0.899448	1.15104	1.3139
1122	10356780	NM_080850	Pask	Mus musculus PAS domain containing serine/threonine kinase (Pask), mRNA.	-1.01538	0.144779	0.870329	0.260402	16.4251	9	0	0	-1.88571	0	-0.951982	-1.00255	-0.769407	-1.11668	-1.07362	-1.17806	0.930498	1.10562	0.396876	0.879795	0.696631	1.17353	0.909355
10895	10454709	NM_001166406	Kif20a	Mus musculus kinesin family member 20A (Kif20a), transcript variant 1, mRNA.	-1.01528	0.0765434	0.87024	0.284229	16.8529	6	0	0	-1.88552	0	-1.04391	-0.920693	-1.08956	-1.00037	-0.935605	-1.10154	0.566178	1.01813	0.643637	1.01193	0.536358	1.05237	1.26307
25364	10594251	NM_024245	Kif23	Mus musculus kinesin family member 23 (Kif23), mRNA.	-1.01519	0.103007	0.870166	0.277761	16.6709	7	0	0	-1.88536	0	-1.04487	-0.932209	-0.998213	-1.18338	-1.04344	-0.889052	0.416064	0.924386	0.740883	0.905274	0.748452	1.05273	1.30337
5255	10399391	NM_177331	Gen1	Mus musculus Gen homolog 1, endonuclease (Drosophila) (Gen1), mRNA.	-1.01519	0.0956763	0.870163	0.279965	16.7147	7	0	0	-1.88535	0	-1.14368	-0.995051	-1.08389	-1.05021	-0.923686	-0.894624	0.674227	0.465853	0.645273	1.13443	0.887543	1.13859	1.14523
20199	10546834	NM_001167730	Rad18	Mus musculus RAD18 homolog (S. cerevisiae) (Rad18), transcript variant 1, mRNA.	-1.01512	0.229133	0.870106	0.206175	15.4845	10	0	0	-1.88523	0	-1.08301	-0.941055	-1.15761	-1.33305	-0.669959	-0.906058	1.06085	0.786227	0.474492	1.01087	0.877553	0.827739	1.05301
8381	10429455	NM_010439	Hmgb1	Mus musculus high mobility group box 1 (Hmgb1), mRNA.	-1.0151	0.103806	0.870088	0.278131	16.6324	7	0	0	-1.88519	0	-1.03552	-0.968067	-0.906633	-0.922947	-1.07789	-1.17957	1.15928	0.582739	0.426393	0.910373	0.853061	1.00339	1.15539
1556	10361375	NM_025995	Fbxo5	Mus musculus F-box protein 5 (Fbxo5), mRNA.	-1.01506	0.136822	0.870048	0.266296	16.3764	9	0	0	-1.8851	0	-1.10658	-1.05429	-1.10402	-1.12742	-0.912267	-0.785754	0.493498	0.67709	0.689528	1.0224	0.865464	1.10306	1.2393
6237	10408243	NM_178192	Hist1h4a	Mus musculus histone cluster 1, H4a (Hist1h4a), mRNA.	-1.0148	0.212242	0.869829	0.223465	15.5751	10	0	0	-1.88463	0	-1.04361	-0.846238	-0.911959	-0.770704	-1.19733	-1.31896	0.586717	1.19251	0.745507	0.755618	0.729415	0.97046	1.10858
11838	10464128	NM_007611	Casp7	Mus musculus caspase 7 (Casp7), mRNA.	-1.01478	0.184214	0.869816	0.243427	15.8594	10	0	0	-1.8846	0	-0.983532	-1.0861	-1.30835	-0.986283	-0.739611	-0.984833	0.714261	0.911588	0.564624	0.717138	1.26518	1.10165	0.814268
186	10346549	NM_007624	Cbx3	Mus musculus chromobox 3 (Cbx3), mRNA.	-1.01475	0.147177	0.869789	0.263823	16.1876	9	0	0	-1.88454	0	-1.06676	-1.10139	-1.03632	-0.801058	-0.882547	-1.20046	0.973186	0.566418	0.6381	0.888239	0.742717	0.917701	1.36216
20319	10548086	NM_009013	Rad51ap1	Mus musculus RAD51 associated protein 1 (Rad51ap1), mRNA.	-1.01474	0.104064	0.869775	0.280517	16.4989	7	0	0	-1.88451	0	-1.0166	-0.940319	-1.11128	-1.10899	-1.06381	-0.847427	1.05321	0.906113	0.394356	1.03538	0.555928	1.02894	1.1145
13002	10475362	NM_030234	Wdr76	Mus musculus WD repeat domain 76 (Wdr76), mRNA.	-1.01463	0.201834	0.869681	0.232768	15.6324	10	0	0	-1.88431	0	-1.29015	-1.05181	-1.13354	-1.04972	-0.81375	-0.748796	0.788233	0.622576	0.546053	1.04536	0.882509	1.18558	1.01745
16349	10508151	NM_175554	Clspn	Mus musculus claspin homolog (Xenopus laevis) (Clspn), mRNA.	-1.01442	0.109455	0.869504	0.280934	16.3532	8	0	0	-1.88392	0	-1.22195	-0.965621	-0.970637	-1.03996	-0.912436	-0.975924	0.821125	0.562535	0.476425	0.985707	0.856665	1.17276	1.21131
22080	10563883	NM_001172092	Depdc1a	Mus musculus DEP domain containing 1a (Depdc1a), transcript variant 1, mRNA.	-1.01438	0.045937	0.86947	0.29546	16.6364	6	0	0	-1.88385	0	-1.07516	-0.976945	-1.03492	-1.05142	-0.960001	-0.987841	0.869856	0.561668	0.639729	0.940506	0.643701	1.01432	1.41651
5714	10403948	NM_178201	Hist1h2bn	Mus musculus histone cluster 1, H2bn (Hist1h2bn), mRNA.	-1.01436	0.265301	0.869447	0.174644	14.852	8	0	0	-1.8838	0	-0.995339	-0.62192	-1.09603	-0.894727	-1.43347	-1.04464	0.721586	1.19248	0.863959	0.770376	0.67836	0.889854	0.969517
4232	10388749	NM_009423	Traf4	Mus musculus TNF receptor associated factor 4 (Traf4), mRNA.	-1.0142	0.134344	0.869313	0.273326	16.1034	9	0	0	-1.88351	0	-1.10564	-1.22119	-0.887692	-0.907477	-0.912624	-1.05056	1.05543	0.939214	0.294565	0.914608	1.12479	0.952108	0.804473
1676	10362581	NM_028006	Tube1	Mus musculus epsilon-tubulin 1 (Tube1), mRNA.	-1.01419	0.134326	0.869309	0.273367	16.1019	8	0	0	-1.8835	0	-0.880302	-1.11007	-1.03657	-1.15105	-0.818452	-1.08871	0.81748	0.713058	0.478665	1.07634	0.696671	1.28707	1.01587
7481	10420097	NM_145705	Tinf2	Mus musculus Terf1 (TRF1)-interacting nuclear factor 2 (Tinf2), mRNA.	-1.01397	0.0636996	0.869121	0.295309	16.4311	6	0	0	-1.8831	0	-0.947539	-1.02852	-1.04114	-1.0586	-0.924226	-1.08382	0.472222	0.986568	0.476929	0.891793	0.913346	1.25143	1.09156
4427	10390860	NM_033373	Krt23	Mus musculus keratin 23 (Krt23), mRNA.	-1.01391	0.182399	0.86907	0.251178	15.6063	10	0	0	-1.88298	0	-1.15188	-1.1265	-1.20335	-0.965198	-0.718706	-0.91785	1.04381	0.634459	0.56664	1.1471	1.1489	0.655576	0.887011
5717	10403957	NM_001195421	Hist1h4m	Mus musculus histone cluster 1, H4m (Hist1h4m), mRNA.	-1.01383	0.224919	0.868999	0.22129	15.159	10	0	0	-1.88283	0	-1.10218	-0.787211	-1.01037	-0.708819	-1.21548	-1.25893	0.599511	1.07477	0.779913	0.702725	0.73448	0.990211	1.20138
6198	10408092	NM_001195421	Hist1h4m	Mus musculus histone cluster 1, H4m (Hist1h4m), mRNA.	-1.01383	0.224919	0.868999	0.22129	15.159	10	0	0	-1.88283	0	-1.10218	-0.787211	-1.01037	-0.708819	-1.21548	-1.25893	0.599511	1.07477	0.779913	0.702725	0.73448	0.990211	1.20138
3766	10384032	NM_008894	Pold2	Mus musculus polymerase (DNA directed), delta 2, regulatory subunit (Pold2), mRNA.	-1.01382	0.0902977	0.868988	0.290479	16.2571	7	0	0	-1.88281	0	-1.0693	-1.01174	-1.09758	-0.955181	-0.864674	-1.08444	0.993039	1.05657	0.23345	1.04427	0.833815	0.999183	0.922587
12911	10474437	NM_026613	Ccdc34	Mus musculus coiled-coil domain containing 34 (Ccdc34), mRNA.	-1.01371	0.139798	0.868891	0.274429	15.9017	9	0	0	-1.8826	0	-1.01029	-1.02198	-1.18753	-1.07791	-0.762256	-1.02228	0.647904	0.60111	0.656454	0.98067	0.750174	1.15635	1.28958
10785	10453512	NM_010655	Kpna2	Mus musculus karyopherin (importin) alpha 2 (Kpna2), mRNA.	-1.01368	0.173652	0.868868	0.258015	15.6143	10	0	0	-1.88255	0	-1.10977	-0.948682	-1.25413	-1.08147	-0.750913	-0.937117	0.441744	0.892353	0.690524	1.02941	0.805488	0.97467	1.24788
21874	10561868	NM_146186	Wdr62	Mus musculus WD repeat domain 62 (Wdr62), mRNA.	-1.01364	0.182576	0.868833	0.25313	15.5215	10	0	0	-1.88247	0	-1.23415	-0.899551	-0.86985	-1.19725	-0.799186	-1.08185	1.03166	0.667828	0.550176	1.32213	0.905913	0.791453	0.812674
23946	10580274	ENSMUST00000109736	Rnaseh2a	cdna:known chromosome:NCBIM37:8:87480509:87493639:-1 gene:ENSMUSG00000052926 gene_biotype:protein_coding transcript_biotype:protein_coding	-1.01363	0.0842018	0.868822	0.293251	16.2215	7	0	0	-1.88245	0	-1.0933	-0.96431	-1.06976	-0.947499	-0.906131	-1.10075	1.3501	0.80183	0.922976	0.962268	0.999739	0.448049	0.596785
10647	10451893	NM_145934	Stap2	Mus musculus signal transducing adaptor family member 2 (Stap2), mRNA.	-1.01326	0.179039	0.868505	0.258035	15.4397	10	0	0	-1.88176	0	-1.13328	-1.04649	-1.29366	-0.838923	-0.850997	-0.916192	0.973186	1.04253	0.495941	0.673569	1.04185	1.19524	0.657221
3904	10385426	NM_010439	Hmgb1	Mus musculus high mobility group box 1 (Hmgb1), mRNA.	-1.01322	0.194896	0.86847	0.248585	15.2834	10	0	0	-1.88169	0	-1.17156	-1.26796	-0.887436	-1.05467	-0.729728	-0.967937	1.14795	0.478766	0.688973	0.860541	0.741992	1.04472	1.11635
19616	10541729	NM_013538	Cdca3	Mus musculus cell division cycle associated 3 (Cdca3), mRNA.	-1.01309	0.242331	0.868366	0.212053	14.777	10	0	0	-1.88146	0	-0.961339	-0.848327	-0.866047	-0.841807	-1.46733	-1.09371	0.652497	1.09608	0.662897	1.04829	0.656039	0.86708	1.09568
13287	10478355	NM_008652	Mybl2	Mus musculus myeloblastosis oncogene-like 2 (Mybl2), mRNA.	-1.01281	0.209553	0.86812	0.241641	15.0305	10	0	0	-1.88093	0	-0.90843	-0.828654	-0.863469	-0.923425	-1.22414	-1.32873	1.09656	0.658753	0.417806	0.944137	0.985478	0.944049	1.03006
18341	10528790	NM_020570	Xrcc2	Mus musculus X-ray repair complementing defective repair in Chinese hamster cells 2 (Xrcc2), mRNA.	-1.01273	0.177185	0.868053	0.262904	15.3023	10	0	0	-1.88078	0	-1.16314	-1.19586	-1.06725	-1.06064	-0.778759	-0.810725	0.884904	0.452962	0.599532	1.10505	0.828874	1.13694	1.0681
1001	10355325	NM_007525	Bard1	Mus musculus BRCA1 associated RING domain 1 (Bard1), mRNA.	-1.0126	0.16124	0.867943	0.272203	15.3967	9	0	0	-1.88054	0	-0.955636	-1.08678	-1.06529	-1.13161	-0.710224	-1.12606	0.911099	0.529163	0.463186	1.11771	0.941095	1.16877	0.944585
1780	10363575	NM_177372	Dna2	Mus musculus DNA replication helicase 2 homolog (yeast) (Dna2), mRNA.	-1.01252	0.0584502	0.867875	0.305307	15.9577	6	0	0	-1.8804	0	-1.05515	-1.02428	-1.00484	-1.09186	-0.929115	-0.969894	0.706584	0.64176	0.539132	0.921892	0.714044	1.36124	1.19048
5718	10403959	ENSMUST00000110469 // ENSMUST00000110469 // ENSMUST00000110469 // ENSMUST00000110469 // ENSMUST00000110469 // ENSMUST00000110469	Hist1h2br // Hist1h2bq // Hist1h2bn // Hist1h2bl // Hist1h2bj // Hist1h2bf	cdna:known chromosome:NCBIM37:13:21898481:21902066:-1 gene:ENSMUSG00000069307 gene_biotype:protein_coding transcript_biotype:protein_coding	-1.01248	0.195928	0.86784	0.253424	15.0678	10	0	0	-1.88032	0	-1.11654	-0.827484	-1.22686	-0.727131	-1.15155	-1.02532	0.662749	1.23035	0.817554	0.747214	0.533917	0.934467	1.14862
6197	10408087	ENSMUST00000110469 // ENSMUST00000110469 // ENSMUST00000110469 // ENSMUST00000110469 // ENSMUST00000110469 // ENSMUST00000110469	Hist1h2br // Hist1h2bq // Hist1h2bn // Hist1h2bl // Hist1h2bj // Hist1h2bf	cdna:known chromosome:NCBIM37:13:21898481:21902066:-1 gene:ENSMUSG00000069307 gene_biotype:protein_coding transcript_biotype:protein_coding	-1.01248	0.195928	0.86784	0.253424	15.0678	10	0	0	-1.88032	0	-1.11654	-0.827484	-1.22686	-0.727131	-1.15155	-1.02532	0.662749	1.23035	0.817554	0.747214	0.533917	0.934467	1.14862
23297	10573515	BC029622	2310036O22Rik	Mus musculus RIKEN cDNA 2310036O22 gene, mRNA (cDNA clone MGC:25625 IMAGE:4207296), complete cds.	-1.01246	0.190484	0.867825	0.256986	15.1116	10	0	0	-1.88029	0	-1.07908	-1.11929	-1.18053	-1.11312	-0.912686	-0.670065	1.10454	0.646709	0.653003	0.734677	1.17883	0.623071	1.13395
26210	10601705	NM_145924	Cenpi	Mus musculus centromere protein I (Cenpi), mRNA.	-1.01246	0.0880459	0.867823	0.299714	15.821	7	0	0	-1.88028	0	-1.07351	-1.04681	-1.12446	-1.00836	-0.893084	-0.928537	0.816134	0.399988	0.607992	1.08031	0.816179	1.10351	1.25064
22738	10568139	NM_010772	Maz	Mus musculus MYC-associated zinc finger protein (purine-binding transcription factor) (Maz), mRNA.	-1.01239	0.261396	0.867762	0.199039	14.4	9	0	0	-1.88015	0	-1.36674	-1.16117	-0.870898	-1.16904	-0.840024	-0.666459	0.748035	1.05986	0.78987	1.08372	0.518942	0.972355	0.901548
22383	10565589	NM_010439	Hmgb1	Mus musculus high mobility group box 1 (Hmgb1), mRNA.	-1.01229	0.177737	0.867673	0.265745	15.172	10	0	0	-1.87996	0	-1.16209	-0.852117	-0.937196	-0.821677	-1.02828	-1.27234	1.15244	0.726509	0.370071	0.924274	0.835821	0.940995	1.1236
7611	10421573	NM_007624	Cbx3	Mus musculus chromobox 3 (Cbx3), mRNA.	-1.01227	0.14609	0.867659	0.281464	15.4142	9	0	0	-1.87993	0	-1.17754	-1.11284	-1.03955	-0.825546	-0.840721	-1.07741	0.961641	0.582516	0.633495	0.829505	0.761642	0.873569	1.43125
21892	10562084	NM_027999	Haus5	Mus musculus HAUS augmin-like complex, subunit 5 (Haus5), mRNA.	-1.01205	0.236626	0.867468	0.226246	14.5684	10	0	0	-1.87951	0	-0.885394	-0.952359	-1.2958	-1.31973	-0.769992	-0.849004	0.982283	0.757898	0.477281	0.940065	0.885918	1.21553	0.813302
947	10354768	NR_037965	Gm6644	Mus musculus predicted gene 6644 (Gm6644), non-coding RNA.	-1.01203	0.142074	0.867457	0.284732	15.3737	9	0	0	-1.87949	0	-1.02111	-1.21008	-1.13891	-0.956743	-0.915266	-0.830093	0.760559	1.00894	0.444876	1.31612	0.885023	0.638933	1.01775
10466	10450374	L78788	D17H6S56E-5	Mus musculus solitary LTR, complete sequence; and proviral envelope protein (G7e) mRNA, complete cds.	-1.01184	0.154193	0.867292	0.280723	15.2315	9	0	0	-1.87913	0	-0.988655	-0.897057	-0.890845	-1.00088	-1.31108	-0.982521	1.06823	0.548495	0.548916	0.791248	0.858166	1.33736	0.918628
17988	10524790	NM_007708	Cit	Mus musculus citron (Cit), mRNA.	-1.01181	0.191921	0.867267	0.260829	14.9219	10	0	0	-1.87908	0	-1.10418	-1.11291	-1.09794	-1.20897	-0.721069	-0.825809	0.604937	0.820134	0.510935	1.08134	0.776339	1.20511	1.07208
19537	10540999	NM_016750	H2afz	Mus musculus H2A histone family, member Z (H2afz), mRNA.	-1.01174	0.18374	0.867204	0.266211	14.9714	10	0	0	-1.87894	0	-1.18423	-0.714639	-1.15475	-1.14633	-0.919283	-0.951195	0.967605	0.467012	0.607913	0.735658	1.01372	1.11758	1.16095
18777	10533090	NM_028128	Rfc5	Mus musculus replication factor C (activator 1) 5 (Rfc5), mRNA.	-1.01151	0.208652	0.867007	0.252166	14.6957	10	0	0	-1.87851	0	-1.03355	-0.689372	-0.863986	-1.03365	-1.20618	-1.24232	0.613242	1.13586	0.50921	1.01513	0.860392	1.16074	0.774471
665	10351825	ENSMUST00000111230	Tagln2	cdna:known chromosome:NCBIM37:1:174430178:174437511:1 gene:ENSMUSG00000026547 gene_biotype:protein_coding transcript_biotype:protein_coding	-1.01144	0.0983639	0.866949	0.30341	15.4593	7	0	0	-1.87839	0	-1.03271	-0.95561	-0.997797	-1.00042	-0.894856	-1.18725	0.466302	0.879218	0.8019	0.768515	1.00968	1.44144	0.701588
4911	10396068	NM_001081406	Lrr1	Mus musculus leucine rich repeat protein 1 (Lrr1), mRNA.	-1.0114	0.0513782	0.866917	0.313149	15.6262	6	0	0	-1.87832	0	-1.05719	-1.0078	-0.980865	-1.06968	-0.92999	-1.02289	1.00098	0.573954	0.573092	1.38557	0.954985	1.02403	0.555802
5261	10399457	NR_037965	Gm6644	Mus musculus predicted gene 6644 (Gm6644), non-coding RNA.	-1.01123	0.140874	0.866766	0.290489	15.1518	8	0	0	-1.87799	0	-0.911908	-1.19632	-0.93947	-0.84276	-1.1579	-1.019	0.784221	1.08573	0.371334	1.21756	0.814938	0.698616	1.09496
19255	10538282	NM_007624	Cbx3	Mus musculus chromobox 3 (Cbx3), mRNA.	-1.01112	0.142522	0.866677	0.290492	15.1119	8	0	0	-1.8778	0	-1.15277	-1.04797	-1.09599	-0.848438	-0.816904	-1.10467	0.917125	0.560197	0.603132	0.804315	0.812443	0.928645	1.44088
2039	10366277	NM_178609	E2f7	Mus musculus E2F transcription factor 7 (E2f7), mRNA.	-1.01099	0.206668	0.86656	0.257355	14.5813	10	0	0	-1.87755	0	-0.647919	-1.03233	-0.971812	-1.01039	-1.14266	-1.26081	1.06224	0.748634	0.500785	0.89927	1.30082	0.830644	0.723526
14906	10494402	NM_178216	Hist2h3c1	Mus musculus histone cluster 2, H3c1 (Hist2h3c1), mRNA.	-1.01062	0.328562	0.866247	0.115038	13.3105	6	0	0	-1.87687	0	-1.0816	-0.429017	-1.05298	-0.919659	-1.16771	-1.41277	0.827148	0.987678	0.804334	0.743411	0.746237	0.927135	1.02779
19846	10543859	NM_009658	Akr1b3	Mus musculus aldo-keto reductase family 1, member B3 (aldose reductase) (Akr1b3), mRNA.	-1.01062	0.151115	0.866246	0.290125	14.9171	9	0	0	-1.87687	0	-1.04464	-1.20536	-1.15436	-0.959328	-0.839696	-0.860325	0.75269	1.00902	0.394109	1.29822	0.876227	0.690458	1.04299
7258	10417798	NM_021542	Kcnk5	Mus musculus potassium channel, subfamily K, member 5 (Kcnk5), mRNA.	-1.01044	0.127577	0.86609	0.300536	15.0166	8	0	0	-1.87653	0	-0.828891	-0.865964	-1.10661	-1.06579	-1.09981	-1.09557	0.589455	1.33564	0.559223	1.02866	0.614779	0.824901	1.10997
28046	10496835	---	---	---	-1.0104	0.104324	0.866055	0.30817	15.1303	7	0	0	-1.87645	0	-1.06517	-1.01782	-0.924172	-0.853604	-1.06212	-1.1395	1.20133	0.497959	0.504081	0.829721	0.747704	1.25168	1.02991
3320	10379363	NM_001029856	Atad5	Mus musculus ATPase family, AAA domain containing 5 (Atad5), mRNA.	-1.01037	0.0902284	0.866028	0.312044	15.1861	7	0	0	-1.87639	0	-1.07384	-1.01506	-1.05918	-1.10743	-0.872187	-0.934495	1.19022	0.337486	0.576292	0.977461	0.833687	1.16367	0.983379
24095	10581813	ENSMUST00000120432	Mlkl	cdna:known chromosome:NCBIM37:8:113835700:113862077:-1 gene:ENSMUSG00000012519 gene_biotype:protein_coding transcript_biotype:protein_coding	-1.0101	0.177532	0.865801	0.280865	14.594	10	0	0	-1.8759	0	-0.991878	-1.12433	-1.14854	-1.10886	-0.670618	-1.01638	0.665647	0.521389	0.547131	1.0363	1.21557	0.999484	1.07508
25134	10592044	NM_144936	Tmem45b	Mus musculus transmembrane protein 45b (Tmem45b), mRNA.	-1.01	0.211124	0.865711	0.261534	14.302	10	0	0	-1.87571	0	-1.03565	-1.18535	-1.20137	-1.13924	-0.781439	-0.716924	0.73983	1.14602	0.368875	1.00077	0.836573	1.08902	0.878879
5100	10398173	NM_011705	Vrk1	Mus musculus vaccinia related kinase 1 (Vrk1), transcript variant 1, mRNA.	-1.00996	0.0799258	0.86568	0.316789	15.1138	6	0	0	-1.87564	0	-1.00907	-0.899494	-1.00945	-0.968555	-1.03057	-1.14262	0.976111	0.725419	0.474847	0.902287	1.20229	1.27782	0.500984
20398	10548745	NR_072990	Gpr19	Mus musculus G protein-coupled receptor 19 (Gpr19), transcript variant 1, non-coding RNA.	-1.00994	0.120145	0.865665	0.306131	14.9244	8	0	0	-1.87561	0	-0.901084	-1.0757	-1.12961	-0.826562	-1.0291	-1.0976	1.27414	0.995317	0.434033	0.966893	0.612007	1.13017	0.647089
12178	10467637	NM_027667	Arhgap19	Mus musculus Rho GTPase activating protein 19 (Arhgap19), transcript variant 1, mRNA.	-1.0099	0.131506	0.865626	0.302498	14.8485	8	0	0	-1.87552	0	-1.02737	-0.904065	-0.8291	-1.19106	-1.00105	-1.10674	0.702206	0.767556	0.556623	0.855605	0.616443	1.20688	1.35407
7127	10416655	NM_001034882	Gm5465	Mus musculus predicted gene 5465 (Gm5465), mRNA.	-1.00972	0.111	0.865478	0.310316	14.9135	7	0	0	-1.8752	0	-1.01182	-0.87896	-1.05006	-0.916933	-1.19479	-1.00578	0.853271	0.570732	0.409035	0.824714	0.928593	1.26912	1.20288
5713	10403943	NM_178200	Hist1h2bm	Mus musculus histone cluster 1, H2bm (Hist1h2bm), mRNA.	-1.00972	0.218065	0.865475	0.258749	14.1793	10	0	0	-1.87519	0	-0.993338	-0.631794	-1.18256	-0.934721	-1.24519	-1.07072	0.589679	1.27604	0.865152	0.637799	0.658738	0.921882	1.10903
8086	10426669	NM_030159	Troap	Mus musculus trophinin associated protein (Troap), transcript variant 1, mRNA.	-1.00966	0.214808	0.865422	0.26145	14.1923	10	0	0	-1.87508	0	-1.00684	-0.88965	-0.807363	-0.952056	-1.42331	-0.978736	0.607697	0.940791	0.658509	1.04802	0.570968	0.958481	1.27348
16153	10506118	NM_146144	Usp1	Mus musculus ubiquitin specific peptidase 1 (Usp1), mRNA.	-1.00951	0.229713	0.865293	0.251787	14.032	10	0	0	-1.8748	0	-1.07546	-1.10673	-1.26939	-1.15135	-0.689431	-0.764696	0.840132	0.802684	0.457054	1.01911	0.713202	0.970633	1.25424
22416	10565862	NM_133692	Pold3	Mus musculus polymerase (DNA-directed), delta 3, accessory subunit (Pold3), mRNA.	-1.00937	0.164204	0.865177	0.292249	14.5078	9	0	0	-1.87455	0	-1.24241	-1.03462	-1.15053	-0.904012	-0.809397	-0.915272	1.09719	0.953039	0.424445	1.25585	1.00555	0.649995	0.670171
3375	10379953	BC067002	4632419I22Rik	Mus musculus RIKEN cDNA 4632419I22 gene, mRNA (cDNA clone MGC:91302 IMAGE:5716200), complete cds.	-1.00917	0.0782722	0.865006	0.321751	14.9054	6	0	0	-1.87418	0	-1.09739	-1.00758	-1.07351	-1.02158	-0.876445	-0.978533	0.855898	0.441166	0.590996	0.879508	1.03416	1.44335	0.809962
6121	10407390	---	---	cdna:genscan chromosome:NCBIM37:13:3123758:3139358:-1 transcript_biotype:protein_coding	-1.00915	0.119017	0.86499	0.311277	14.7234	7	0	0	-1.87414	0	-1.01489	-0.902681	-1.03017	-0.930734	-1.23028	-0.946174	1.28427	1.03306	0.501528	0.459112	1.06488	0.713986	0.998097
16210	10506822	NM_011015	Orc1	Mus musculus origin recognition complex, subunit 1 (Orc1), transcript variant A, mRNA.	-1.00884	0.0651586	0.864718	0.326107	14.8583	6	0	0	-1.87356	0	-1.10184	-1.06601	-0.923353	-1.00102	-0.993134	-0.967676	0.923465	0.402334	0.539133	1.02672	0.718168	1.14298	1.30023
18395	10529299	NM_009193	Slbp	Mus musculus stem-loop binding protein (Slbp), mRNA.	-1.00868	0.163689	0.864586	0.296877	14.3435	9	0	0	-1.87327	0	-1.30855	-0.836582	-0.996989	-0.944611	-0.916211	-1.04916	0.692085	0.767135	0.325575	1.13112	0.986931	1.18596	0.963299
19054	10536294	NM_130877	Peg10	Mus musculus paternally expressed 10 (Peg10), transcript variant 1, mRNA.	-1.00856	0.238206	0.864484	0.252239	13.7538	10	0	0	-1.87305	0	-1.08388	-0.964479	-1.15112	-1.17425	-1.13097	-0.546682	0.330254	0.92741	0.831825	0.90687	0.936495	1.12429	0.994241
11010	10455813	NM_010721	Lmnb1	Mus musculus lamin B1 (Lmnb1), mRNA.	-1.00853	0.0985112	0.864458	0.320839	14.6602	7	0	0	-1.87299	0	-1.07853	-0.873371	-1.11611	-1.08284	-0.923258	-0.977094	0.572245	0.68765	0.528773	0.75183	0.94227	1.37683	1.1916
257	10347386	NM_021383	Rqcd1	Mus musculus rcd1 (required for cell differentiation) homolog 1 (S. pombe) (Rqcd1), mRNA.	-1.00833	0.0766795	0.864285	0.326921	14.6909	6	0	0	-1.87262	0	-1.07625	-0.962817	-1.10345	-0.920746	-1.04604	-0.9407	0.644309	1.03182	0.295566	0.902121	0.778614	1.26517	1.1324
23415	10574632	NM_001161458	Cbfb	Mus musculus core binding factor beta (Cbfb), transcript variant 4, mRNA.	-1.00832	0.134381	0.864272	0.311103	14.4318	8	0	0	-1.87259	0	-1.12196	-0.977193	-1.13052	-1.11801	-0.853923	-0.848302	0.804036	0.518679	0.409282	0.938247	1.22164	0.966711	1.19131
22852	10569057	NM_001172101	Rnh1	Mus musculus ribonuclease/angiogenin inhibitor 1 (Rnh1), transcript variant 3, mRNA.	-1.0082	0.139762	0.86417	0.309843	14.373	8	0	0	-1.87237	0	-1.12617	-1.04832	-0.862079	-1.19418	-0.966694	-0.851745	0.989318	0.445515	0.946122	1.23049	1.19046	0.518766	0.728517
6227	10408197	ENSMUST00000078156	Hist1h2bh	cdna:known chromosome:NCBIM37:13:23634793:23635228:-1 gene:ENSMUSG00000064168 gene_biotype:protein_coding transcript_biotype:protein_coding	-1.00794	0.267541	0.863947	0.231528	13.3748	10	0	0	-1.87189	0	-0.945299	-0.698035	-0.968094	-0.802843	-1.20798	-1.42538	0.651254	1.29446	0.800518	0.862048	0.634148	0.777644	1.02756
5757	10404063	NM_175660	Hist1h2ab	Mus musculus histone cluster 1, H2ab (Hist1h2ab), mRNA.	-1.0078	0.306913	0.863831	0.187786	12.9972	8	0	0	-1.87163	0	-0.869205	-0.560601	-1.0314	-0.908264	-1.44442	-1.23293	0.748361	1.13387	0.749855	0.664882	0.808801	0.817292	1.12376
10146	10447383	NM_008532	Epcam	Mus musculus epithelial cell adhesion molecule (Epcam), mRNA.	-1.00779	0.296181	0.863818	0.201781	13.092	8	0	0	-1.87161	0	-1.43119	-1.18364	-1.13631	-0.646722	-0.739854	-0.909021	0.585958	1.01735	0.799965	0.667506	1.17577	0.878226	0.921954
7523	10420488	NM_199015	D14Ertd668e	Mus musculus DNA segment, Chr 14, ERATO Doi 668, expressed (D14Ertd668e), mRNA.	-1.00772	0.18389	0.863763	0.293049	13.9865	10	0	0	-1.87149	0	-0.92818	-0.827972	-1.02024	-1.06287	-0.870214	-1.33686	0.914582	1.0441	1.2102	0.985281	0.770242	0.284144	0.837793
24339	10583952	NM_178113	Ncapd3	Mus musculus non-SMC condensin II complex, subunit D3 (Ncapd3), mRNA.	-1.00772	0.253972	0.863763	0.245576	13.4484	10	0	0	-1.87149	0	-1.16864	-1.18853	-1.22781	-1.0749	-0.774339	-0.612119	0.800339	0.831022	0.467285	1.2109	0.693191	1.02346	1.02014
18624	10531579	NM_010439	Hmgb1	Mus musculus high mobility group box 1 (Hmgb1), mRNA.	-1.00761	0.115312	0.863666	0.321562	14.3572	7	0	0	-1.87128	0	-1.10668	-0.995033	-1.12556	-0.803838	-1.03047	-0.984084	0.998239	0.634069	0.44299	0.612084	0.859577	1.17253	1.32617
13469	10480087	---	---	cdna:pseudogene chromosome:NCBIM37:2:12004239:12005630:-1 gene:ENSMUSG00000080801 gene_biotype:pseudogene transcript_biotype:transcribed_processed_pseudogene	-1.00759	0.114328	0.86365	0.321965	14.3572	7	0	0	-1.87124	0	-1.07489	-0.95114	-0.987945	-0.864987	-0.97048	-1.19611	0.649559	1.27365	0.532067	1.12831	0.489166	0.816592	1.1562
21904	10562181	NM_017405	Lsr	Mus musculus lipolysis stimulated lipoprotein receptor (Lsr), transcript variant 1, mRNA.	-1.00742	0.174147	0.863504	0.299861	13.9841	9	0	0	-1.87093	0	-1.21324	-1.20871	-1.02201	-0.944954	-0.819949	-0.835672	0.27814	0.840506	0.78972	1.04552	1.1621	1.11963	0.808905
15089	10496379	NM_016750	H2afz	Mus musculus H2A histone family, member Z (H2afz), mRNA.	-1.0073	0.224871	0.863398	0.271137	13.5965	10	0	0	-1.87069	0	-1.24706	-0.769933	-1.22442	-1.15812	-0.805698	-0.838553	1.04222	0.416938	0.614531	0.77499	0.975234	1.05531	1.16456
11590	10461723	BC038020	Fam111a	Mus musculus RIKEN cDNA 4632417K18 gene, mRNA (cDNA clone MGC:46762 IMAGE:3599082), complete cds.	-1.00708	0.227099	0.863215	0.271062	13.5358	10	0	0	-1.8703	0	-1.20203	-0.733413	-1.28837	-0.92876	-0.783725	-1.1062	0.446569	0.787453	0.610174	1.12507	0.856702	1.1745	1.04204
26708	10605674	NM_008892	Pola1	Mus musculus polymerase (DNA directed), alpha 1 (Pola1), mRNA.	-1.00706	0.104327	0.863193	0.327836	14.2739	7	0	0	-1.87025	0	-1.13398	-0.901726	-1.12165	-1.0279	-0.902792	-0.954317	0.821289	0.438744	0.55058	0.956723	0.840772	1.44673	0.987516
3871	10385052	NM_023146	Ranbp17	Mus musculus RAN binding protein 17 (Ranbp17), mRNA.	-1.00703	0.222989	0.863167	0.274269	13.5558	10	0	0	-1.8702	0	-1.30601	-0.93043	-1.15129	-1.03445	-0.645443	-0.974543	1.02112	0.675428	0.433701	0.999742	0.771129	1.28684	0.854204
6195	10408083	NM_178207	Hist1h3i	Mus musculus histone cluster 1, H3i (Hist1h3i), mRNA.	-1.007	0.354476	0.863145	0.109756	12.4227	5	0	0	-1.87015	0	-1.0369	-0.42231	-0.978036	-0.937375	-1.15154	-1.51585	0.835174	0.994411	0.811248	0.720829	0.759566	0.931459	0.989327
15050	10495933	NM_197997	4930422G04Rik	Mus musculus RIKEN cDNA 4930422G04 gene (4930422G04Rik), mRNA.	-1.00695	0.20632	0.863098	0.285459	13.6621	10	0	0	-1.87005	0	-0.775591	-0.862121	-1.1039	-0.860049	-1.129	-1.31103	1.19747	0.946669	0.33861	0.683783	0.815429	1.07986	0.979867
5602	10402750	NM_010439	Hmgb1	Mus musculus high mobility group box 1 (Hmgb1), mRNA.	-1.00673	0.214401	0.862914	0.281883	13.5594	10	0	0	-1.86965	0	-1.04671	-0.945625	-0.88344	-0.738244	-1.05199	-1.37439	1.23769	0.83631	0.301913	0.975933	0.839866	0.926693	0.921996
6229	10408202	NM_178205	Hist1h3e	Mus musculus histone cluster 1, H3e (Hist1h3e), mRNA.	-1.00672	0.357669	0.8629	0.105922	12.3483	5	0	0	-1.86962	0	-1.0466	-0.411289	-0.996879	-0.905242	-1.18082	-1.49947	0.804055	1.00061	0.81504	0.718585	0.79553	0.931882	0.974597
8174	10427606	NM_145468	Skp2	Mus musculus S-phase kinase-associated protein 2 (p45) (Skp2), transcript variant 2, mRNA.	-1.00671	0.142064	0.862892	0.317875	14.0138	8	0	0	-1.8696	0	-0.794469	-0.922366	-1.06632	-0.953057	-1.14522	-1.1588	0.603889	0.602748	0.496815	0.983281	0.842848	1.16993	1.34073
4971	10396849	NM_009014	Rad51l1	Mus musculus RAD51-like 1 (S. cerevisiae) (Rad51l1), transcript variant 1, mRNA.	-1.00657	0.131296	0.862775	0.322496	14.0387	8	0	0	-1.86935	0	-1.21483	-0.832422	-0.953394	-1.05758	-0.933368	-1.04783	0.897617	0.740342	0.457269	1.22205	0.674854	1.36072	0.686582
1882	10364518	NM_001077363	Ptbp1	Mus musculus polypyrimidine tract binding protein 1 (Ptbp1), transcript variant 1, mRNA.	-1.00643	0.250503	0.862656	0.258063	13.2256	10	0	0	-1.86909	0	-1.06321	-1.31714	-1.18624	-0.751835	-0.667722	-1.05245	0.547642	1.16285	0.589014	0.974332	0.802953	0.767183	1.19462
19539	10541034	ENSMUST00000112900	Zfand4	cdna:known chromosome:NCBIM37:6:116214240:116280316:1 gene:ENSMUSG00000042213 gene_biotype:protein_coding transcript_biotype:protein_coding	-1.00637	0.11816	0.862606	0.327832	14.0559	7	0	0	-1.86898	0	-0.946625	-1.20169	-1.07524	-0.972524	-0.859233	-0.982924	1.15942	0.615581	0.582395	1.26236	0.418797	1.10653	0.893153
16259	10507362	NM_133250	Mutyh	Mus musculus mutY homolog (E. coli) (Mutyh), nuclear gene encoding mitochondrial protein, transcript variant 2, mRNA.	-1.00627	0.327724	0.862519	0.173159	12.547	7	0	0	-1.86879	0	-1.20468	-0.625891	-0.772426	-0.76884	-1.21346	-1.45234	0.976816	0.731632	0.613554	0.783207	1.07508	1.04593	0.811409
4631	10393058	NM_008211	H3f3b	Mus musculus H3 histone, family 3B (H3f3b), mRNA.	-1.00626	0.224618	0.862505	0.278393	13.3891	10	0	0	-1.86876	0	-1.12998	-0.985228	-0.892603	-0.676964	-1.00715	-1.34562	0.945972	0.695081	0.690597	0.500572	1.37457	0.886483	0.944262
18875	10534395	NM_009903	Cldn4	Mus musculus claudin 4 (Cldn4), mRNA.	-1.00613	0.168984	0.862396	0.310206	13.7354	9	0	0	-1.86852	0	-1.15212	-1.17152	-1.13039	-0.766273	-0.939684	-0.876796	0.803377	0.955598	0.387334	0.842898	0.769222	1.43687	0.841476
17913	10523923	NM_028481	Ccdc18	Mus musculus coiled-coil domain containing 18 (Ccdc18), mRNA.	-1.00576	0.0457562	0.862076	0.345936	14.1418	6	0	0	-1.86783	0	-1.06597	-1.05459	-0.997906	-0.997208	-0.95545	-0.963416	0.75275	0.472685	0.617718	1.16276	0.535102	1.27374	1.21978
9528	10440953	NM_021720	Donson	Mus musculus downstream neighbor of SON (Donson), mRNA.	-1.00575	0.148813	0.862071	0.320915	13.7685	8	0	0	-1.86782	0	-1.05727	-0.825582	-1.24047	-0.885656	-0.958003	-1.06751	0.985923	0.507002	0.349129	0.892231	1.03032	1.26772	1.00217
5746	10404028	NM_145073	Hist1h3g	Mus musculus histone cluster 1, H3g (Hist1h3g), mRNA.	-1.00565	0.362286	0.861986	0.111516	12.144	5	0	0	-1.86764	0	-1.07734	-0.414704	-0.97592	-0.875747	-1.18124	-1.50895	0.837807	0.989992	0.801915	0.726227	0.74775	0.939712	0.990498
22828	10568897	NM_133755	Tubgcp2	Mus musculus tubulin, gamma complex associated protein 2 (Tubgcp2), mRNA.	-1.00558	0.174047	0.861929	0.311153	13.5915	9	0	0	-1.86751	0	-1.10255	-0.880402	-1.31015	-0.885384	-0.986629	-0.868388	0.862047	0.858736	0.445354	0.633973	1.20775	1.32125	0.704389
5608	10402795	NM_028023	Cdca4	Mus musculus cell division cycle associated 4 (Cdca4), mRNA.	-1.00545	0.237021	0.861811	0.275244	13.1426	10	0	0	-1.86726	0	-0.91268	-0.59885	-0.980118	-1.08563	-1.25119	-1.20421	0.873752	0.765354	0.57352	0.749109	1.35381	1.09009	0.627038
4742	10394392	NM_008692	Nfyc	Mus musculus nuclear transcription factor-Y gamma (Nfyc), transcript variant 1, mRNA.	-1.00543	0.234769	0.861793	0.276982	13.1553	10	0	0	-1.86722	0	-1.01086	-0.935733	-1.09815	-1.39107	-0.680825	-0.915921	0.959037	0.713852	0.596289	0.818345	0.524584	1.21629	1.20416
11996	10465912	NM_007999	Fen1	Mus musculus flap structure specific endonuclease 1 (Fen1), mRNA.	-1.00539	0.161844	0.861763	0.317734	13.6221	9	0	0	-1.86715	0	-1.07455	-0.914636	-1.17076	-0.732368	-1.00794	-1.13209	0.904208	0.480407	0.360768	1.03795	1.07854	1.20686	0.963605
22739	10568150	NM_145588	Kif22	Mus musculus kinesin family member 22 (Kif22), mRNA.	-1.00525	0.283015	0.86164	0.23785	12.7524	9	0	0	-1.86689	0	-0.941407	-0.656756	-0.889795	-0.845729	-1.34759	-1.3502	0.548055	1.06501	0.672473	0.86905	0.66483	1.05257	1.15949
3144	10377380	NR_026565	1500010J02Rik	Mus musculus RIKEN cDNA 1500010J02 gene (1500010J02Rik), transcript variant 2, non-coding RNA.	-1.00505	0.141539	0.861474	0.327638	13.6589	8	0	0	-1.86653	0	-1.24695	-0.851263	-1.01784	-1.06866	-0.911372	-0.934234	0.778784	0.908491	0.751006	1.27897	0.834265	1.19655	0.282247
916	10354374	NM_016917	Slc40a1	Mus musculus solute carrier family 40 (iron-regulated transporter), member 1 (Slc40a1), mRNA.	-1.00496	0.175879	0.861395	0.314018	13.4545	9	0	0	-1.86636	0	-1.22669	-0.720211	-0.89567	-1.10312	-1.03527	-1.04881	1.10757	0.904287	0.194329	1.10878	0.931685	0.801381	0.981729
5751	10404049	NM_178204	Hist1h3d	Mus musculus histone cluster 1, H3d (Hist1h3d), mRNA.	-1.00491	0.369735	0.861353	0.103192	11.9708	5	0	0	-1.86626	0	-1.06984	-0.407247	-0.975588	-0.874765	-1.17112	-1.53091	0.828416	0.987518	0.803301	0.724533	0.779614	0.927523	0.978567
10072	10446441	NM_001003919	Ddx11	Mus musculus DEAD/H (Asp-Glu-Ala-Asp/His) box polypeptide 11 (CHL1-like helicase homolog, S. cerevisiae) (Ddx11), mRNA.	-1.00472	0.0702298	0.861189	0.3481	13.8567	6	0	0	-1.86591	0	-1.02437	-0.995568	-1.12777	-0.976389	-0.915292	-0.988929	0.527607	0.717871	0.440467	1.10233	0.721632	1.15022	1.36819
23291	10573451	NM_001168246	Syce2	Mus musculus synaptonemal complex central element protein 2 (Syce2), transcript variant 1, mRNA.	-1.00468	0.172682	0.861158	0.317125	13.4179	9	0	0	-1.86584	0	-0.806624	-0.891179	-1.13005	-0.855827	-1.2108	-1.13363	0.63535	0.969165	0.388653	0.91076	0.668772	1.29593	1.15947
8693	10432986	NM_153416	Aaas	Mus musculus achalasia, adrenocortical insufficiency, alacrimia (Aaas), mRNA.	-1.00463	0.131671	0.861109	0.333443	13.617	8	0	0	-1.86574	0	-1.11819	-0.934985	-1.20491	-1.00035	-0.881082	-0.888245	0.818448	1.03901	0.567288	1.28696	1.02354	0.997869	0.294651
1378	10359648	BC052855	BC055324	Mus musculus cDNA sequence BC055324, mRNA (cDNA clone MGC:60834 IMAGE:30058659), complete cds.	-1.00452	0.172805	0.861016	0.318045	13.3843	9	0	0	-1.86553	0	-0.875477	-1.18322	-0.856497	-0.863012	-1.24696	-1.00194	0.670247	0.821285	0.36912	1.0069	0.723005	1.34355	1.093
14907	10494405	NM_178215	Hist2h3b	Mus musculus histone cluster 2, H3b (Hist2h3b), mRNA.	-1.00449	0.374378	0.860995	0.0965812	11.8716	5	0	0	-1.86549	0	-1.04896	-0.405367	-0.923962	-0.879321	-1.26502	-1.50433	0.828352	0.989192	0.819727	0.746877	0.759707	0.925707	0.957403
3884	10385236	NR_037965	Gm6644	Mus musculus predicted gene 6644 (Gm6644), non-coding RNA.	-1.00449	0.256786	0.860993	0.26681	12.8245	10	0	0	-1.86548	0	-1.09905	-1.28918	-1.24054	-0.995596	-0.705865	-0.696714	0.699695	1.00823	0.520748	1.26139	0.962943	0.584492	0.989456
15549	10500543	NM_010439	Hmgb1	Mus musculus high mobility group box 1 (Hmgb1), mRNA.	-1.00441	0.200884	0.86092	0.304669	13.1944	10	0	0	-1.86533	0	-0.980318	-0.871049	-0.830466	-0.842944	-1.19777	-1.30389	1.03364	0.755976	0.305386	0.765128	0.818218	1.16027	1.18782
6238	10408246	ENSMUST00000091701 // ENSMUST00000091701 // ENSMUST00000091701 // ENSMUST00000091701	Hist1h3a // Hist1h3i // Hist1h3h // Hist1h3g	cdna:known chromosome:NCBIM37:13:23853722:23854255:-1 gene:ENSMUSG00000069265 gene_biotype:protein_coding transcript_biotype:protein_coding	-1.00434	0.371614	0.860859	0.107871	11.8731	5	0	0	-1.8652	0	-1.07223	-0.422468	-0.916942	-0.876379	-1.19968	-1.53832	0.827183	0.993393	0.804187	0.727989	0.760342	0.925897	0.987025
7142	10416736	ENSMUST00000022656	6720463M24Rik	cdna:known chromosome:NCBIM37:14:99445646:99473756:1 gene:ENSMUSG00000022070 gene_biotype:protein_coding transcript_biotype:protein_coding	-1.00418	0.121682	0.860728	0.339042	13.5691	7	0	0	-1.86491	0	-1.07975	-1.03217	-1.14214	-1.02845	-0.950673	-0.791921	0.40987	1.1442	0.736422	1.04185	0.484267	0.883465	1.32502
19907	10544501	NM_007971	Ezh2	Mus musculus enhancer of zeste homolog 2 (Drosophila) (Ezh2), transcript variant 1, mRNA.	-1.0038	0.0980524	0.860404	0.347402	13.5804	7	0	0	-1.86421	0	-1.05979	-0.947035	-1.13094	-1.06547	-0.864675	-0.954912	0.640934	1.00144	0.358512	1.10602	0.573589	0.986179	1.35615
6235	10408239	NM_175653	Hist1h3c	Mus musculus histone cluster 1, H3c (Hist1h3c), mRNA.	-1.00373	0.375132	0.86034	0.108207	11.7596	5	0	0	-1.86407	0	-1.06122	-0.404776	-0.968714	-0.865352	-1.17992	-1.54239	0.817395	1.00074	0.81546	0.716987	0.77047	0.921181	0.980148
18223	10527455	NM_178576	Cpsf4	Mus musculus cleavage and polyadenylation specific factor 4 (Cpsf4), mRNA.	-1.00351	0.160736	0.860149	0.329056	13.253	8	0	0	-1.86366	0	-1.18659	-0.907873	-1.1505	-0.773053	-1.0783	-0.924731	0.744255	1.02814	0.218054	0.919774	0.80222	1.24309	1.06551
10717	10452709	NM_023294	Ndc80	Mus musculus NDC80 homolog, kinetochore complex component (S. cerevisiae) (Ndc80), mRNA.	-1.00298	0.206306	0.859693	0.310356	12.8986	10	0	0	-1.86267	0	-1.21561	-0.677354	-0.857519	-0.987816	-1.10268	-1.17687	0.571514	0.670813	0.552587	0.96662	0.724068	1.21773	1.31452
11068	10456488	AK158414	Cep192	Mus musculus adult inner ear cDNA, RIKEN full-length enriched library, clone:F930115A20 product:hypothetical protein, full insert sequence.	-1.00293	0.193075	0.859656	0.317626	12.9693	10	0	0	-1.86259	0	-1.12722	-1.12808	-0.95461	-1.1627	-0.645995	-0.998989	0.991023	0.461953	0.415412	1.06211	0.771807	1.10179	1.2135
7233	10417601	NM_008972	Ptma	Mus musculus prothymosin alpha (Ptma), mRNA.	-1.00285	0.269529	0.859582	0.267835	12.4562	10	0	0	-1.86243	0	-1.12383	-0.79359	-1.13033	-0.55536	-1.15715	-1.25681	0.517752	1.0572	0.552753	0.687228	0.949707	1.13947	1.11296
3714	10383472	NM_133223	Rac3	Mus musculus RAS-related C3 botulinum substrate 3 (Rac3), mRNA.	-1.00283	0.153383	0.859572	0.335722	13.1618	8	0	0	-1.86241	0	-1.13982	-1.08961	-0.942942	-1.15641	-0.761112	-0.927111	0.899306	0.361739	1.04557	0.450413	1.23564	0.876461	1.14788
5758	10404065	NM_178203	Hist1h3b	Mus musculus histone cluster 1, H3b (Hist1h3b), mRNA.	-1.00279	0.380917	0.859538	0.107461	11.587	5	0	0	-1.86233	0	-1.05759	-0.397874	-0.938465	-0.86997	-1.20976	-1.54311	0.81967	0.994422	0.797339	0.718046	0.77842	0.931796	0.977074
5712	10403941	NM_178206	Hist1h3h	Mus musculus histone cluster 1, H3h (Hist1h3h), mRNA.	-1.0026	0.379593	0.859369	0.11456	11.5719	5	0	0	-1.86197	0	-1.01816	-0.422369	-0.927641	-0.875157	-1.20242	-1.56983	0.821968	0.982267	0.784514	0.713943	0.770659	0.934745	1.00748
460	10349733	NM_175294	Nucks1	Mus musculus nuclear casein kinase and cyclin-dependent kinase substrate 1 (Nucks1), transcript variant 1, mRNA.	-1.00256	0.171289	0.859336	0.329986	13.0213	9	0	0	-1.8619	0	-1.10278	-1.22268	-1.04208	-1.03834	-0.745206	-0.864261	0.722454	0.958109	0.317223	0.844241	0.84922	1.43349	0.890614
2567	10371770	NM_001033331	Gas2l3	Mus musculus growth arrest-specific 2 like 3 (Gas2l3), transcript variant 1, mRNA.	-1.00238	0.277449	0.859187	0.264275	12.3267	10	0	0	-1.86157	0	-1.13017	-1.08431	-1.2243	-1.25911	-0.588292	-0.728121	0.638927	0.773618	0.593575	1.05427	0.617754	1.11572	1.22044
15008	10495416	NM_020505	Vav3	Mus musculus vav 3 oncogene (Vav3), transcript variant 1, mRNA.	-1.00228	0.242386	0.859099	0.292256	12.5512	10	0	0	-1.86138	0	-1.18492	-1.11111	-1.31916	-0.741066	-0.927866	-0.729568	0.813174	0.316389	0.906592	0.885127	0.80172	0.994117	1.29657
24605	10586110	NM_001033175	Cln6	Mus musculus ceroid-lipofuscinosis, neuronal 6 (Cln6), mRNA.	-1.0022	0.0907045	0.859033	0.357496	13.2848	6	0	0	-1.86124	0	-1.06345	-1.04412	-0.987719	-1.1145	-0.865566	-0.937873	1.24976	1.14204	0.642755	1.3065	0.479921	0.646521	0.545723
26065	10600545	NM_010439	Hmgb1	Mus musculus high mobility group box 1 (Hmgb1), mRNA.	-1.00218	0.249561	0.859009	0.287858	12.4865	10	0	0	-1.86119	0	-1.12808	-0.789145	-0.789821	-0.771601	-1.19162	-1.34279	1.11918	0.835036	0.310972	0.83494	0.748347	0.992769	1.17181
4310	10389606	NM_175563	Prr11	Mus musculus proline rich 11 (Prr11), mRNA.	-1.00201	0.217712	0.858864	0.309664	12.662	10	0	0	-1.86087	0	-0.829557	-0.80029	-0.841239	-1.01208	-1.22654	-1.30234	0.471073	0.930086	0.778664	1.08959	0.44084	1.06452	1.23727
5745	10404026	NM_175661	Hist1h2af	Mus musculus histone cluster 1, H2af (Hist1h2af), mRNA.	-1.00172	0.356786	0.858616	0.174321	11.6368	7	0	0	-1.86033	0	-0.905889	-0.518757	-0.896069	-0.841339	-1.41187	-1.43639	0.619576	1.01927	0.804924	0.764489	0.73402	0.961291	1.10674
15636	10501402	NM_029522	Gpsm2	Mus musculus G-protein signalling modulator 2 (AGS3-like, C. elegans) (Gpsm2), mRNA.	-1.00156	0.0809537	0.858484	0.362741	13.189	6	0	0	-1.86005	0	-0.962526	-0.990274	-1.1652	-0.970011	-0.95929	-0.962091	0.780577	0.514407	0.395394	1.01154	0.778387	1.05127	1.47781
20840	10552337	NM_010439	Hmgb1	Mus musculus high mobility group box 1 (Hmgb1), mRNA.	-1.00151	0.218494	0.858435	0.312203	12.5738	10	0	0	-1.85994	0	-0.821209	-0.953005	-0.844393	-0.844599	-1.2129	-1.33294	1.11728	0.559276	0.365035	0.88822	0.831933	0.977681	1.26962
17450	10519012	NM_001112744	Arhgef16	Mus musculus Rho guanine nucleotide exchange factor (GEF) 16 (Arhgef16), mRNA.	-1.0015	0.262755	0.858431	0.28238	12.2914	10	0	0	-1.85993	0	-1.03533	-1.12009	-1.3653	-1.04094	-0.868123	-0.579245	0.694118	0.741228	0.420396	1.19752	1.13563	1.06606	0.754065
18633	10531707	NM_001115010	Lin54	Mus musculus lin-54 homolog (C. elegans) (Lin54), transcript variant 1, mRNA.	-1.00147	0.219189	0.858401	0.312031	12.5631	10	0	0	-1.85987	0	-1.10807	-1.09149	-1.31116	-0.963995	-0.849298	-0.684793	1.1801	0.37877	0.51015	0.829202	1.17963	1.00007	0.930889
2649	10372687	NM_134010	Nup107	Mus musculus nucleoporin 107 (Nup107), mRNA.	-1.00146	0.15496	0.858398	0.342645	12.9038	8	0	0	-1.85986	0	-1.06751	-0.987796	-1.14111	-1.15604	-0.750537	-0.905786	0.983264	0.538269	0.29382	0.905243	0.845963	1.25382	1.18841
8130	10427166	NM_001014976	Espl1	Mus musculus extra spindle poles-like 1 (S. cerevisiae) (Espl1), mRNA.	-1.00128	0.103241	0.85824	0.359466	13.0719	7	0	0	-1.85952	0	-1.13803	-0.972487	-0.895257	-0.888177	-1.01473	-1.09901	0.434618	0.860292	0.631582	0.969379	0.52084	1.1615	1.42947
19189	10537728	NM_007610	Casp2	Mus musculus caspase 2 (Casp2), mRNA.	-1.0012	0.28072	0.858172	0.269676	12.1232	10	0	0	-1.85937	0	-1.435	-0.924706	-1.25877	-0.856531	-0.798985	-0.733208	0.993034	0.840124	0.39941	1.03398	0.665819	0.843498	1.23134
16933	10514201	NM_173400	Haus6	Mus musculus HAUS augmin-like complex, subunit 6 (Haus6), mRNA.	-1.0011	0.159472	0.858082	0.342918	12.8181	8	0	0	-1.85918	0	-1.11617	-1.04669	-1.09456	-1.12696	-0.72433	-0.897859	0.96956	0.532039	0.259708	1.06344	0.906295	1.01981	1.25573
6191	10408072	NM_178182	Hist1h2ai	Mus musculus histone cluster 1, H2ai (Hist1h2ai), mRNA.	-1.001	0.366251	0.858004	0.165355	11.4713	6	0	0	-1.85901	0	-0.915359	-0.503675	-0.880428	-0.838727	-1.42117	-1.44667	0.620134	1.03433	0.803169	0.791588	0.744669	0.927735	1.0844
24199	10582835	NM_010439	Hmgb1	Mus musculus high mobility group box 1 (Hmgb1), mRNA.	-1.0009	0.175561	0.857915	0.33738	12.7073	9	0	0	-1.85882	0	-1.19175	-0.962769	-0.933226	-0.706134	-1.06853	-1.143	1.17343	0.696697	0.310815	0.736663	0.7332	1.06816	1.28644
22444	10566142	NM_010439	Hmgb1	Mus musculus high mobility group box 1 (Hmgb1), mRNA.	-1.00086	0.237229	0.857879	0.304578	12.3553	10	0	0	-1.85874	0	-1.0024	-0.9667	-0.802495	-0.696468	-1.21902	-1.31807	1.13251	0.850849	0.272794	0.82039	0.739771	1.01841	1.17043
2573	10371846	NM_001042558	Apaf1	Mus musculus apoptotic peptidase activating factor 1 (Apaf1), transcript variant 1, mRNA.	-1.00069	0.235853	0.857735	0.306488	12.3374	10	0	0	-1.85843	0	-1.17999	-1.03479	-1.22615	-1.1198	-0.611858	-0.831547	1.13142	0.36157	0.772845	0.65601	1.20817	1.10915	0.764971
24838	10588767	NM_011634	Traip	Mus musculus TRAF-interacting protein (Traip), mRNA.	-1.00068	0.167939	0.857726	0.341802	12.7067	8	0	0	-1.85841	0	-0.735369	-0.891883	-1.0177	-1.06351	-1.07278	-1.22284	0.832624	0.864718	0.168804	1.04582	0.804446	1.25279	1.03488
9151	10437639	NM_007929	Emp2	Mus musculus epithelial membrane protein 2 (Emp2), mRNA.	-1.00058	0.237281	0.857642	0.306225	12.3118	10	0	0	-1.85823	0	-1.22249	-1.13927	-1.1299	-1.09094	-0.610973	-0.809923	0.87085	0.586673	0.306262	0.969851	1.1067	1.15266	1.0105
9887	10444858	ENSMUST00000045956	Cchcr1	cdna:known chromosome:NCBIM37:17:35654121:35667960:1 gene:ENSMUSG00000040312 gene_biotype:protein_coding transcript_biotype:protein_coding	-1.00043	0.19523	0.857512	0.330898	12.5278	9	0	0	-1.85794	0	-0.961047	-0.836236	-0.753941	-1.02323	-1.14513	-1.283	0.644532	1.00725	0.221038	1.10773	0.874169	1.19123	0.95664
7828	10424113	NM_178920	Mal2	Mus musculus mal, T cell differentiation protein 2 (Mal2), mRNA.	-1.00041	0.382511	0.857495	0.139284	11.2741	6	0	0	-1.85791	0	-1.23946	-1.24209	-1.2795	-1.20765	-0.39944	-0.63433	0.843547	0.864011	0.823325	0.647449	1.10428	0.930507	0.789351
14902	10494386	NM_178213	Hist2h2ab	Mus musculus histone cluster 2, H2ab (Hist2h2ab), mRNA.	-1.00028	0.323863	0.857387	0.233225	11.6902	8	0	0	-1.85767	0	-0.889555	-0.656792	-0.798079	-0.84713	-1.37242	-1.43773	0.573517	1.21186	0.785819	0.802313	0.631798	0.894695	1.10171
16425	10508996	NM_001081099	2610002D18Rik	Mus musculus RIKEN cDNA 2610002D18 gene (2610002D18Rik), mRNA.	-1.0002	0.0969261	0.857311	0.36647	12.8945	6	0	0	-1.85751	0	-0.953852	-0.87595	-0.95612	-1.01401	-1.0411	-1.16014	0.779558	0.66396	0.306778	1.06953	0.626177	1.21609	1.33908
24262	10583324	---	---	cdna:genscan chromosome:NCBIM37:9:15487346:15542822:1 transcript_biotype:protein_coding	-1.00007	0.23541	0.857207	0.31048	12.2446	10	0	0	-1.85728	0	-0.853549	-0.8298	-1.34077	-0.879432	-1.26213	-0.834767	0.860408	0.672457	0.380824	0.846248	1.40492	0.847622	0.987964
1982	10365578	NM_028334	Nup37	Mus musculus nucleoporin 37 (Nup37), transcript variant 1, mRNA.	-1.00005	0.21919	0.857187	0.320358	12.3354	10	0	0	-1.85724	0	-1.16268	-0.91641	-1.23166	-0.885172	-0.656446	-1.14794	0.502788	0.600294	0.477334	1.13985	0.952634	1.12512	1.20229
18361	10528915	NM_021288	Tyms	Mus musculus thymidylate synthase (Tyms), transcript variant 1, mRNA.	-1.00004	0.330367	0.85718	0.227472	11.6117	8	0	0	-1.85722	0	-1.05647	-1.17869	-1.46334	-1.06541	-0.613551	-0.622795	0.769162	0.628636	0.512587	1.09287	1.0319	1.06688	0.898224
11069	10456490	NM_027556	Cep192	Mus musculus centrosomal protein 192 (Cep192), mRNA.	-0.999961	0.282152	0.857109	0.276878	11.9328	10	0	0	-1.85707	0	-1.30801	-1.25745	-1.04323	-1.0663	-0.625852	-0.698921	0.884168	0.506722	0.46363	0.914042	0.931187	1.17582	1.1242
9862	10444658	NM_033444	Clic1	Mus musculus chloride intracellular channel 1 (Clic1), mRNA.	-0.999944	0.215239	0.857095	0.323202	12.3408	10	0	0	-1.85704	0	-1.11881	-0.874414	-1.10392	-0.628953	-1.04773	-1.22582	0.565849	0.975553	0.727334	0.600681	1.51195	0.732069	0.886229
2464	10370552	NM_015817	Ppap2c	Mus musculus phosphatidic acid phosphatase type 2C (Ppap2c), mRNA.	-0.999913	0.179491	0.857068	0.341077	12.523	9	0	0	-1.85698	0	-0.938222	-1.19528	-0.976825	-0.851827	-1.23769	-0.799636	0.59735	1.00847	0.253685	1.13627	0.923381	1.25714	0.823184
24094	10581800	NM_146218	Rfwd3	Mus musculus ring finger and WD repeat domain 3 (Rfwd3), mRNA.	-0.999881	0.219232	0.857041	0.321319	12.3086	10	0	0	-1.85692	0	-1.18392	-1.11494	-1.27615	-0.867908	-0.802287	-0.754079	0.85465	0.522347	0.331841	0.958877	0.981749	1.13243	1.21739
15178	10497325	NM_010439	Hmgb1	Mus musculus high mobility group box 1 (Hmgb1), mRNA.	-0.99974	0.268789	0.85692	0.289164	11.9881	10	0	0	-1.85666	0	-1.02426	-0.88578	-0.766546	-0.707974	-1.20845	-1.40543	1.30616	0.805656	0.354094	0.916941	0.711172	0.925659	0.978754
22782	10568461	NM_146218	Rfwd3	Mus musculus ring finger and WD repeat domain 3 (Rfwd3), mRNA.	-0.999694	0.227962	0.856881	0.317311	12.23	10	0	0	-1.85658	0	-1.1539	-1.15054	-1.29159	-0.872957	-0.791891	-0.737294	0.853934	0.522556	0.33556	0.99066	0.972233	1.11897	1.20425
19864	10544106	---	---	cdna:pseudogene chromosome:NCBIM37:6:38492303:38496074:-1 gene:ENSMUSG00000081670 gene_biotype:pseudogene transcript_biotype:transcribed_unprocessed_pseudogene	-0.999655	0.338029	0.856847	0.221177	11.5064	8	0	0	-1.8565	0	-1.29749	-1.11278	-1.44991	-0.793128	-0.601159	-0.743461	0.622785	0.7591	0.700811	0.994042	0.683099	1.02333	1.21476
4072	10386949	NM_010439	Hmgb1	Mus musculus high mobility group box 1 (Hmgb1), mRNA.	-0.999618	0.28107	0.856815	0.280077	11.8912	10	0	0	-1.85643	0	-0.95068	-0.8266	-0.797931	-0.739471	-1.24019	-1.44284	1.18196	0.841831	0.309924	0.885702	0.748941	0.973957	1.05539
16423	10508986	NM_019641	Stmn1	Mus musculus stathmin 1 (Stmn1), mRNA.	-0.999545	0.332929	0.856753	0.228429	11.5283	8	0	0	-1.8563	0	-1.37163	-1.26322	-0.962501	-0.43887	-0.858487	-1.10257	0.648093	0.894021	0.455015	1.03475	0.865204	1.06114	1.03904
15767	10502816	NM_016867	Gipc2	Mus musculus GIPC PDZ domain containing family, member 2 (Gipc2), mRNA.	-0.999481	0.163094	0.856698	0.35017	12.5285	8	0	0	-1.85618	0	-0.94769	-0.964146	-0.918318	-0.825221	-1.30007	-1.04144	0.803071	0.301417	0.625937	0.911355	1.21378	1.34379	0.797533
17975	10524631	NM_145209	Oasl1	Mus musculus 2'-5' oligoadenylate synthetase-like 1 (Oasl1), mRNA.	-0.999358	0.20285	0.856592	0.333096	12.3161	10	0	0	-1.85595	0	-1.03953	-0.707343	-1.03506	-0.830647	-1.27857	-1.10499	1.12617	0.470275	0.997688	1.17564	1.16032	0.431864	0.634191
11676	10462361	NM_010439	Hmgb1	Mus musculus high mobility group box 1 (Hmgb1), mRNA.	-0.999292	0.267486	0.856536	0.293024	11.9319	10	0	0	-1.85583	0	-0.965808	-0.838981	-0.812062	-0.735885	-1.22445	-1.41856	1.15802	0.810305	0.282598	0.882374	0.755039	1.00886	1.09855
7452	10419779	NM_145462	Haus4	Mus musculus HAUS augmin-like complex, subunit 4 (Haus4), mRNA.	-0.999278	0.132527	0.856524	0.361805	12.6191	7	0	0	-1.8558	0	-1.20464	-0.947216	-1.01289	-0.799199	-0.982954	-1.04877	1.27131	1.09624	0.401847	0.922429	0.662106	1.21105	0.430683
826	10353341	NM_010439	Hmgb1	Mus musculus high mobility group box 1 (Hmgb1), mRNA.	-0.999165	0.269068	0.856427	0.292618	11.904	10	0	0	-1.85559	0	-0.94538	-0.84136	-0.814307	-0.74099	-1.22875	-1.4242	1.163	0.810989	0.28444	0.88857	0.755177	0.986994	1.10582
24564	10585703	NM_133982	Rpp25	Mus musculus ribonuclease P 25 subunit (human) (Rpp25), mRNA.	-0.999073	0.225921	0.856348	0.322128	12.1473	10	0	0	-1.85542	0	-0.63229	-0.89017	-1.19957	-0.944337	-1.23884	-1.08923	0.892443	1.26992	0.527627	1.27205	0.531534	0.894383	0.606478
8931	10435581	NM_029977	Polq	Mus musculus polymerase (DNA directed), theta (Polq), transcript variant 1, mRNA.	-0.998924	0.0615456	0.856221	0.379071	12.7535	6	0	0	-1.85514	0	-0.910469	-1.00677	-0.989244	-0.957745	-1.04702	-1.08229	0.33794	0.64936	0.600115	1.14761	0.694931	1.35934	1.20425
25069	10591430	NM_027911	Raver1	Mus musculus ribonucleoprotein, PTB-binding 1 (Raver1), mRNA.	-0.998833	0.190308	0.856142	0.342067	12.2979	9	0	0	-1.85497	0	-0.907981	-1.20215	-0.696061	-1.1432	-0.927132	-1.11646	0.208814	0.848321	0.781258	1.01352	1.00705	0.801604	1.33242
3066	10376455	NM_178218	Hist3h2a	Mus musculus histone cluster 3, H2a (Hist3h2a), mRNA.	-0.998714	0.305283	0.85604	0.264513	11.6085	10	0	0	-1.85475	0	-1.06638	-0.77504	-1.21119	-0.564968	-1.41858	-0.956125	0.57445	0.984957	0.631265	0.747994	0.705191	1.03918	1.30925
17942	10524266	NM_016681	Chek2	Mus musculus checkpoint kinase 2 (Chek2), mRNA.	-0.998687	0.282729	0.856017	0.284812	11.7511	10	0	0	-1.8547	0	-0.89903	-1.19808	-0.922385	-1.4586	-0.846023	-0.66801	0.660534	0.429563	0.899493	1.29789	0.720777	0.907514	1.07635
16200	10506680	NM_028355	Tmem48	Mus musculus transmembrane protein 48 (Tmem48), mRNA.	-0.998425	0.190721	0.855793	0.344079	12.2329	9	0	0	-1.85422	0	-1.06286	-1.03335	-1.2443	-1.10812	-0.787278	-0.754642	0.56985	0.399055	0.703261	1.24427	0.751045	1.00684	1.31623
14455	10490104	NM_011497	Aurka	Mus musculus aurora kinase A (Aurka), mRNA.	-0.998331	0.144217	0.855713	0.362929	12.4203	8	0	0	-1.85404	0	-1.03901	-0.769782	-1.05815	-1.07602	-1.16356	-0.88348	0.370998	0.890456	0.628478	1.05271	0.53977	1.10056	1.40702
17900	10523802	NM_009863	Cdc7	Mus musculus cell division cycle 7 (S. cerevisiae) (Cdc7), mRNA.	-0.998324	0.102268	0.855707	0.374646	12.5587	7	0	0	-1.85403	0	-1.01845	-0.999711	-0.941245	-1.12879	-0.834462	-1.06729	0.880053	0.505583	0.32189	0.946584	0.731073	1.37718	1.22759
15370	10499035	NM_029797	Mnd1	Mus musculus meiotic nuclear divisions 1 homolog (S. cerevisiae) (Mnd1), mRNA.	-0.998112	0.103466	0.855525	0.375422	12.5204	7	0	0	-1.85364	0	-0.876602	-1.03358	-1.13971	-1.08009	-0.954607	-0.904089	1.25423	0.306212	0.410025	0.803245	0.92738	1.06511	1.22248
14827	10493794	NM_001163525	S100a14	Mus musculus S100 calcium binding protein A14 (S100a14), transcript variant 1, mRNA.	-0.998099	0.138516	0.855514	0.365954	12.4045	7	0	0	-1.85361	0	-0.959681	-0.962266	-1.03618	-0.795921	-1.2232	-1.01135	0.844167	0.637715	0.265758	0.648648	1.09869	1.24537	1.24825
23733	10578193	NM_026067	Eri1	Mus musculus exoribonuclease 1 (Eri1), mRNA.	-0.998055	0.263792	0.855476	0.303455	11.7812	10	0	0	-1.85353	0	-1.25088	-1.14222	-1.29268	-0.873912	-0.715167	-0.713473	0.671607	0.598441	0.463596	1.01938	0.792074	1.22713	1.2161
11335	10459236	NM_021296	Grpel2	Mus musculus GrpE-like 2, mitochondrial (Grpel2), nuclear gene encoding mitochondrial protein, mRNA.	-0.997964	0.299058	0.855397	0.27547	11.5505	10	0	0	-1.85336	0	-1.29709	-1.14897	-1.22222	-1.00578	-0.817835	-0.495872	0.632563	0.891039	0.461836	0.929145	1.34479	0.911012	0.817392
10568	10451054	NM_199016	Enpp4	Mus musculus ectonucleotide pyrophosphatase/phosphodiesterase 4 (Enpp4), mRNA.	-0.997942	0.204827	0.855379	0.3399	12.0905	10	0	0	-1.85332	0	-0.907918	-1.26723	-1.17683	-0.932024	-1.01011	-0.693543	0.241863	1.16389	0.756634	1.11944	0.667778	1.1824	0.85565
14905	10494395	---	---	cdna:known chromosome:NCBIM37:3:96049477:96052432:1 gene:ENSMUSG00000070392 gene_biotype:processed_transcript transcript_biotype:processed_transcript	-0.997783	0.351205	0.855243	0.219762	11.1829	8	0	0	-1.85303	0	-0.966379	-0.497407	-0.867801	-0.859316	-1.3304	-1.4654	0.629999	1.20646	0.784615	0.737143	0.659171	0.873278	1.09604
24050	10581363	NM_177150	Cenpt	Mus musculus centromere protein T (Cenpt), mRNA.	-0.997761	0.16358	0.855224	0.358976	12.2532	8	0	0	-1.85299	0	-1.09491	-0.961298	-1.23094	-0.743852	-0.936653	-1.01892	0.343397	0.959732	0.422493	1.17356	1.23105	0.755229	1.10111
10316	10448803	NM_198937	Hn1l	Mus musculus hematological and neurological expressed 1-like (Hn1l), mRNA.	-0.997667	0.319849	0.855143	0.257411	11.3782	9	0	0	-1.85281	0	-0.958266	-1.38316	-1.31421	-1.05271	-0.65616	-0.621495	0.873833	0.817539	0.489425	0.88555	0.610284	1.05048	1.25889
18549	10531022	NM_172880	Tmprss11e	Mus musculus transmembrane protease, serine 11e (Tmprss11e), mRNA.	-0.997576	0.0366454	0.855065	0.388242	12.5601	6	0	0	-1.85264	0	-1.04113	-1.0063	-0.952496	-0.959707	-1.03297	-0.992852	1.13725	0.211091	0.697159	0.592536	1.27376	1.23024	0.843411
8346	10429114	NM_172514	Tmem71	Mus musculus transmembrane protein 71 (Tmem71), mRNA.	-0.997534	0.146423	0.855029	0.366249	12.2862	8	0	0	-1.85256	0	-0.894153	-0.992353	-1.23024	-1.07607	-0.8078	-0.984594	0.996145	0.641707	0.396428	0.785845	0.994729	1.53175	0.638601
5711	10403938	ENSMUST00000070124 // ENSMUST00000070124 // ENSMUST00000070124 // ENSMUST00000070124 // ENSMUST00000070124 // ENSMUST00000070124 // ENSMUST00000070124 // ENSMUST00000070124 // ENSMUST00000070124 // ENSMUST00000070124	Hist1h2ao // Hist1h2ai // Hist1h2ab // Hist1h2ap // Hist1h2an // Hist1h2ah // Hist1h2ag // Hist1h2ae // Hist1h2ad // Hist1h2ac	cdna:known chromosome:NCBIM37:13:21808281:21809321:1 gene:ENSMUSG00000071516 gene_biotype:protein_coding transcript_biotype:protein_coding	-0.997532	0.372657	0.855028	0.190486	11.0067	7	0	0	-1.85256	0	-0.890493	-0.524974	-0.827365	-0.844882	-1.45783	-1.43965	0.587696	1.05065	0.785912	0.778984	0.70887	0.965265	1.10781
2974	10375713	NM_145926	Mgat4b	Mus musculus mannoside acetylglucosaminyltransferase 4, isoenzyme B (Mgat4b), mRNA.	-0.997521	0.0817377	0.855018	0.382736	12.4784	6	0	0	-1.85254	0	-0.882664	-1.0827	-1.03459	-0.943825	-1.08243	-0.958915	1.0026	0.360303	0.63963	0.694295	1.56877	0.983624	0.735898
5792	10404359	NM_153546	Mboat1	Mus musculus membrane bound O-acyltransferase domain containing 1 (Mboat1), mRNA.	-0.997425	0.246427	0.854936	0.319065	11.7948	10	0	0	-1.85236	0	-1.26889	-1.13495	-1.15171	-1.0027	-0.600073	-0.826234	0.912053	0.297917	0.76532	0.929675	1.22591	1.18732	0.666354
11067	10456439	NM_027556	Cep192	Mus musculus centrosomal protein 192 (Cep192), mRNA.	-0.997339	0.295957	0.854862	0.282375	11.4892	10	0	0	-1.8522	0	-1.19704	-1.05789	-1.32778	-1.13478	-0.608472	-0.658069	0.780771	0.498935	0.502052	1.04375	0.840065	1.14206	1.1764
16898	10513818	NM_019641	Stmn1	Mus musculus stathmin 1 (Stmn1), mRNA.	-0.997125	0.338828	0.854679	0.240519	11.1875	8	0	0	-1.8518	0	-1.36212	-1.26235	-0.965275	-0.421643	-0.847845	-1.12351	0.626836	0.956056	0.433998	1.04794	0.834019	1.04457	1.03933
4270	10389134	NM_172796	Slfn9	Mus musculus schlafen 9 (Slfn9), mRNA.	-0.997105	0.375279	0.854661	0.190349	10.9404	7	0	0	-1.85177	0	-0.78876	-0.461732	-1.07625	-1.24279	-1.53805	-0.87505	0.918475	0.824647	0.513083	0.706341	0.960263	1.0057	1.05412
10193	10447702	NM_028677	Ppih	Mus musculus peptidyl prolyl isomerase H (Ppih), transcript variant 1, mRNA.	-0.99707	0.185033	0.854632	0.353826	12.0559	9	0	0	-1.8517	0	-1.12571	-1.06114	-1.19105	-1.07082	-0.739777	-0.793928	0.639567	0.612571	0.466363	1.12598	0.590953	1.24602	1.30097
19360	10539135	NM_007599	Capg	Mus musculus capping protein (actin filament), gelsolin-like (Capg), transcript variant 1, mRNA.	-0.997038	0.109736	0.854604	0.379218	12.3304	7	0	0	-1.85164	0	-1.09375	-0.93032	-0.88028	-0.886936	-1.07025	-1.12069	0.379213	1.19224	0.522068	0.739587	0.927058	1.47316	0.748907
7832	10424188	NM_134092	Mtbp	Mus musculus Mdm2, transformed 3T3 cell double minute p53 binding protein (Mtbp), transcript variant 1, mRNA.	-0.996959	0.167793	0.854536	0.361488	12.1139	8	0	0	-1.8515	0	-1.19008	-0.928913	-1.05661	-1.12967	-0.721421	-0.955059	1.10069	0.27417	0.458999	0.912395	0.90716	1.03706	1.29127
6196	10408085	NM_178184	Hist1h2an	Mus musculus histone cluster 1, H2an (Hist1h2an), mRNA.	-0.996947	0.384419	0.854526	0.176153	10.8605	6	0	0	-1.85147	0	-0.859931	-0.55466	-0.823579	-0.799484	-1.42689	-1.51714	0.602245	1.06113	0.78697	0.780648	0.725894	0.97097	1.05383
8009	10425905	NM_016714	Nup50	Mus musculus nucleoporin 50 (Nup50), mRNA.	-0.996927	0.157127	0.854509	0.365622	12.1522	8	0	0	-1.85144	0	-1.21237	-0.881125	-0.816468	-0.954976	-1.16261	-0.954012	0.49193	0.690764	0.348954	0.845195	1.07322	1.29781	1.23369
19519	10540738	ENSMUST00000036340	Fancd2	cdna:known chromosome:NCBIM37:6:113481676:113547011:1 gene:ENSMUSG00000034023 gene_biotype:protein_coding transcript_biotype:protein_coding	-0.996855	0.231387	0.854447	0.331517	11.7977	10	0	0	-1.8513	0	-1.05384	-1.24418	-1.23638	-0.962139	-0.655378	-0.829218	0.631195	1.06102	0.385369	1.21323	0.527321	1.14488	1.01811
29660	10341145	---	---	---	-0.996845	0.0209704	0.854438	0.392672	12.4529	6	0	0	-1.85128	0	-1.03745	-0.982758	-0.995559	-0.9789	-0.99228	-0.994126	1.01253	0.736766	1.0833	0.390164	1.54771	0.522789	0.687811
5211	10399011	NM_134041	4930427A07Rik	Mus musculus RIKEN cDNA 4930427A07 gene (4930427A07Rik), mRNA.	-0.99668	0.16493	0.854297	0.364007	12.0841	8	0	0	-1.85098	0	-1.00839	-0.944521	-0.778855	-1.05688	-0.918993	-1.27244	0.688457	0.603635	0.655366	1.50988	0.513826	1.19718	0.811728
18115	10526241	NM_009902	Cldn3	Mus musculus claudin 3 (Cldn3), mRNA.	-0.996606	0.119075	0.854234	0.378978	12.2358	7	0	0	-1.85084	0	-0.9606	-1.08143	-0.937155	-1.047	-0.810085	-1.14336	1.30119	0.595744	1.03201	0.532132	1.20708	0.297617	1.01386
12936	10474526	NM_207206	Lpcat4	Mus musculus lysophosphatidylcholine acyltransferase 4 (Lpcat4), mRNA.	-0.996573	0.21708	0.854205	0.341022	11.832	10	0	0	-1.85078	0	-1.07115	-1.08662	-1.28635	-1.05401	-0.697702	-0.783607	0.259092	0.769616	1.15349	0.944788	1.32277	0.725065	0.804619
319	10348078	NM_008972	Ptma	Mus musculus prothymosin alpha (Ptma), mRNA.	-0.996519	0.288987	0.854159	0.293547	11.4272	10	0	0	-1.85068	0	-1.12887	-0.788464	-1.0773	-0.524172	-1.13541	-1.3249	0.469069	1.08302	0.52215	0.664763	0.986359	1.17171	1.08204
19083	10536595	NM_133939	Naa38	Mus musculus N(alpha)-acetyltransferase 38, NatC auxiliary subunit (Naa38), mRNA.	-0.996176	0.256061	0.853865	0.319993	11.5727	10	0	0	-1.85004	0	-1.18098	-1.16492	-1.24771	-1.02083	-0.720328	-0.642283	0.710171	0.615126	0.387839	1.10411	0.863487	0.943694	1.35263
2267	10368370	---	---	cdna:genscan chromosome:NCBIM37:10:25553017:25553502:-1 transcript_biotype:protein_coding	-0.996152	0.266237	0.853845	0.313136	11.5128	10	0	0	-1.85	0	-0.798878	-1.22356	-0.916718	-0.634394	-1.34679	-1.05657	0.608436	0.835055	0.465331	0.667727	0.866082	1.28104	1.25324
15522	10500324	ENSMUST00000090782	Hist2h2ac	cdna:known chromosome:NCBIM37:3:96024284:96024803:-1 gene:ENSMUSG00000068855 gene_biotype:protein_coding transcript_biotype:protein_coding	-0.996064	0.361327	0.853769	0.220566	10.9174	8	0	0	-1.84983	0	-0.888919	-0.566961	-0.782851	-0.864266	-1.38176	-1.49163	0.607322	1.22582	0.826583	0.749078	0.658145	0.84892	1.06051
506	10350159	NM_133664	Lad1	Mus musculus ladinin (Lad1), mRNA.	-0.996042	0.223423	0.85375	0.340489	11.727	10	0	0	-1.84979	0	-1.1821	-1.34564	-0.842433	-0.963404	-0.761972	-0.880703	0.801829	1.39691	0.418274	0.703795	1.22611	0.779523	0.649811
25121	10591881	NM_010439	Hmgb1	Mus musculus high mobility group box 1 (Hmgb1), mRNA.	-0.995888	0.180027	0.853619	0.362062	11.9067	9	0	0	-1.84951	0	-1.05782	-0.755885	-0.990822	-0.849743	-1.27236	-1.0487	0.889806	0.788558	0.333192	0.521241	0.870281	1.39853	1.17372
3636	10382542	ENSMUST00000021085	Nup85	cdna:known chromosome:NCBIM37:11:115425748:115445299:1 gene:ENSMUSG00000020739 gene_biotype:protein_coding transcript_biotype:protein_coding	-0.995871	0.135582	0.853604	0.377944	12.0724	7	0	0	-1.84948	0	-0.955627	-0.879021	-0.865969	-0.956546	-1.20891	-1.10916	0.516949	0.982467	0.263982	0.9415	0.76611	1.40452	1.0997
3406	10380260	NM_009546	Trim25	Mus musculus tripartite motif-containing 25 (Trim25), mRNA.	-0.99581	0.15359	0.853552	0.372463	12.0002	8	0	0	-1.84936	0	-1.10734	-0.939327	-1.0692	-0.811635	-0.848378	-1.19898	0.318571	0.746617	0.633584	0.866514	1.07384	1.51432	0.821415
6201	10408111	ENSMUST00000073261	Hist1h2af	cdna:known chromosome:NCBIM37:13:23625775:23626173:1 gene:ENSMUSG00000061991 gene_biotype:protein_coding transcript_biotype:protein_coding	-0.995807	0.392547	0.853549	0.173166	10.6833	6	0	0	-1.84936	0	-0.878935	-0.498953	-0.826246	-0.830436	-1.42616	-1.51411	0.606049	1.03085	0.795827	0.774634	0.731894	0.95103	1.08456
6344	10409220	NM_013549	Hist2h2aa1	Mus musculus histone cluster 2, H2aa1 (Hist2h2aa1), mRNA.	-0.995803	0.351499	0.853546	0.235485	10.9519	8	0	0	-1.84935	0	-0.889258	-0.571751	-0.836189	-0.824112	-1.41688	-1.43663	0.596548	1.28978	0.81723	0.71879	0.67929	0.856801	1.01638
26016	10600093	NM_009549	Zfp185	Mus musculus zinc finger protein 185 (Zfp185), transcript variant 1, mRNA.	-0.99565	0.313075	0.853414	0.278027	11.1749	10	0	0	-1.84906	0	-1.03682	-1.16104	-1.39609	-1.10288	-0.507929	-0.76914	1.19669	1.05438	0.317315	0.81553	0.836225	0.964438	0.789322
9769	10443408	NM_011950	Mapk13	Mus musculus mitogen-activated protein kinase 13 (Mapk13), mRNA.	-0.995636	0.165841	0.853402	0.368932	11.9285	8	0	0	-1.84904	0	-1.06822	-1.26458	-0.953038	-1.03329	-0.832075	-0.822623	1.21519	0.90611	0.184828	0.807592	0.808147	1.31949	0.732467
5716	10403955	NM_001177544	Hist1h2ao	Mus musculus histone cluster 1, H2ao (Hist1h2ao), mRNA.	-0.995621	0.392984	0.853389	0.174328	10.6609	6	0	0	-1.84901	0	-0.878574	-0.498265	-0.825828	-0.830035	-1.42675	-1.51427	0.607645	1.0328	0.788321	0.775341	0.730183	0.952908	1.08653
8302	10428672	NM_183089	Dscc1	Mus musculus defective in sister chromatid cohesion 1 homolog (S. cerevisiae) (Dscc1), mRNA.	-0.995437	0.0643732	0.853232	0.395364	12.1842	6	0	0	-1.84867	0	-1.09338	-0.938744	-1.01521	-0.942719	-0.942766	-1.0398	1.1201	0.163449	0.457613	1.14173	0.892902	1.21948	0.977358
5399	10400649	NM_011133	Pole2	Mus musculus polymerase (DNA directed), epsilon 2 (p59 subunit) (Pole2), mRNA.	-0.995135	0.247702	0.852973	0.331288	11.4825	10	0	0	-1.84811	0	-1.21924	-0.959536	-1.29866	-1.04304	-0.638264	-0.812071	0.914724	0.557812	0.798762	1.04326	1.25171	1.10478	0.299769
3371	10379891	NM_016910	Ppm1d	Mus musculus protein phosphatase 1D magnesium-dependent, delta isoform (Ppm1d), mRNA.	-0.994966	0.290678	0.852828	0.301821	11.2254	10	0	0	-1.84779	0	-1.31033	-0.974182	-1.30713	-1.0535	-0.676699	-0.647955	1.14249	0.683955	0.29097	1.14331	0.791621	1.02163	0.895821
22864	10569181	ENSMUST00000026580	Lrdd	cdna:known chromosome:NCBIM37:7:148624012:148629924:-1 gene:ENSMUSG00000025507 gene_biotype:protein_coding transcript_biotype:protein_coding	-0.99465	0.120675	0.852557	0.387995	11.9404	7	0	0	-1.84721	0	-1.18314	-0.842228	-0.996079	-0.926436	-1.0768	-0.943211	0.868382	1.05525	0.293179	1.00629	1.1834	1.23102	0.330374
16063	10505299	NM_138653	Bspry	Mus musculus B-box and SPRY domain containing (Bspry), mRNA.	-0.994591	0.127068	0.852507	0.386571	11.9132	7	0	0	-1.8471	0	-0.926965	-1.11785	-1.09036	-0.778573	-1.0659	-0.9879	0.51744	1.04016	0.336942	0.787803	0.729654	1.50399	1.05156
23608	10576883	AF017152	Shcbp1	Mus musculus Shc binding protein (mPAL) mRNA, complete cds.	-0.994306	0.0342233	0.852262	0.403697	12.0516	6	0	0	-1.84657	0	-0.996112	-0.929842	-1.02932	-1.00854	-0.991552	-1.01047	0.834161	0.386868	0.581122	0.926939	0.500105	1.25614	1.4805
24619	10586184	NM_025372	Tipin	Mus musculus timeless interacting protein (Tipin), mRNA.	-0.994183	0.278103	0.852157	0.316149	11.2015	10	0	0	-1.84634	0	-1.04154	-0.942452	-1.01433	-1.34971	-0.503533	-1.11353	1.05661	0.457157	0.365231	0.91365	0.985994	1.20911	0.977345
15040	10495873	NM_008972	Ptma	Mus musculus prothymosin alpha (Ptma), mRNA.	-0.994069	0.293884	0.852059	0.304712	11.1006	10	0	0	-1.84613	0	-1.22394	-0.697575	-1.16233	-0.544641	-1.18053	-1.1554	0.397975	1.10643	0.52267	0.707439	1.0619	1.13481	1.0332
10177	10447594	ENSMUST00000092966 // ENSMUST00000092966 // ENSMUST00000092966 // ENSMUST00000092966	Dynlt1a // Dynlt1c // Dynlt1f // Dynlt1b	cdna:known chromosome:NCBIM37:17:6647054:6655064:-1 gene:ENSMUSG00000000579 gene_biotype:protein_coding transcript_biotype:protein_coding	-0.994042	0.369987	0.852036	0.225489	10.6444	8	0	0	-1.84608	0	-1.02957	-0.753825	-0.799936	-0.571728	-1.21441	-1.59479	0.717933	0.853487	0.687265	0.774733	1.31988	0.929464	0.68149
14904	10494390	NM_013549	Hist2h2aa1	Mus musculus histone cluster 2, H2aa1 (Hist2h2aa1), mRNA.	-0.993935	0.310563	0.851944	0.291447	10.9902	10	0	0	-1.84588	0	-0.959729	-0.579588	-0.868788	-0.837996	-1.31859	-1.39892	0.585751	1.40412	0.808032	0.706378	0.625476	0.757177	1.07668
17686	10521690	NM_028677	Ppih	Mus musculus peptidyl prolyl isomerase H (Ppih), transcript variant 1, mRNA.	-0.993839	0.200352	0.851862	0.36362	11.5405	9	0	0	-1.8457	0	-1.17521	-1.09111	-1.14451	-1.07054	-0.711376	-0.770286	0.56232	0.579323	0.494309	1.14604	0.621797	1.24857	1.31067
788	10353010	ENSMUST00000088658	Mybl1	cdna:known chromosome:NCBIM37:1:9657496:9690290:-1 gene:ENSMUSG00000025912 gene_biotype:protein_coding transcript_biotype:protein_coding	-0.993743	0.265128	0.85178	0.327791	11.218	10	0	0	-1.84552	0	-1.19661	-0.730057	-1.28293	-1.21683	-0.71572	-0.820305	0.842072	0.898816	0.305754	1.16278	0.753332	1.31127	0.68843
7855	10424413	NM_010439	Hmgb1	Mus musculus high mobility group box 1 (Hmgb1), mRNA.	-0.993704	0.280381	0.851747	0.317262	11.1322	10	0	0	-1.84545	0	-0.950895	-0.945466	-0.755065	-0.701562	-1.14141	-1.46783	1.31578	0.804393	0.265359	0.966351	0.736802	0.965971	0.907568
3775	10384145	NM_029938	H2afv	Mus musculus H2A histone family, member V (H2afv), mRNA.	-0.993591	0.239073	0.851649	0.344902	11.331	10	0	0	-1.84524	0	-1.31171	-0.933732	-1.14983	-0.621453	-0.879674	-1.06514	0.622004	1.31238	0.333506	1.01698	0.637319	1.17862	0.860732
26565	10604620	NM_001166365	Fam122b	Mus musculus family with sequence similarity 122, member B (Fam122b), transcript variant 1, mRNA.	-0.99359	0.12644	0.851648	0.391494	11.7744	7	0	0	-1.84524	0	-1.13463	-1.00765	-1.07673	-1.06312	-0.858921	-0.82049	0.602833	1.23444	0.222278	1.09638	0.875869	1.3032	0.626534
25148	10592160	---	---	cdna:pseudogene chromosome:NCBIM37:9:35381221:35382248:-1 gene:ENSMUSG00000086984 gene_biotype:pseudogene transcript_biotype:transcribed_processed_pseudogene	-0.993547	0.134221	0.851612	0.389531	11.7455	7	0	0	-1.84516	0	-0.992905	-1.00524	-1.01848	-1.12609	-0.739652	-1.07892	1.43442	0.859313	0.170938	1.08946	0.937155	0.644782	0.825215
476	10349872	---	---	cdna:genscan chromosome:NCBIM37:1:135042725:135226222:1 transcript_biotype:protein_coding	-0.993344	0.108574	0.851438	0.397081	11.7884	7	0	0	-1.84478	0	-1.17961	-0.987568	-1.04166	-0.906254	-0.968588	-0.87638	0.466073	1.41441	0.298195	0.761522	0.860145	1.25593	0.903783
17813	10523012	NM_007832	Dck	Mus musculus deoxycytidine kinase (Dck), mRNA.	-0.993258	0.207644	0.851364	0.363159	11.434	9	0	0	-1.84462	0	-1.07971	-0.818434	-1.30166	-1.12185	-0.869572	-0.768321	0.940103	0.234487	0.629431	1.04892	0.668681	1.14487	1.29305
4469	10391103	NM_010593	Jup	Mus musculus junction plakoglobin (Jup), mRNA.	-0.993238	0.290631	0.851347	0.312251	11.0222	10	0	0	-1.84458	0	-1.25949	-1.2694	-1.14457	-1.00469	-0.598873	-0.682399	0.65599	0.246695	0.876999	1.084	0.965833	0.959867	1.17004
5756	10404061	NM_175664	Hist1h2bb	Mus musculus histone cluster 1, H2bb (Hist1h2bb), mRNA.	-0.993237	0.330241	0.851346	0.277503	10.7987	9	0	0	-1.84458	0	-0.868016	-0.48289	-0.952139	-1.02741	-1.48755	-1.14141	0.813446	1.22949	0.972824	0.826816	0.388789	0.654292	1.07377
6194	10408081	NM_020034	Hist1h1b	Mus musculus histone cluster 1, H1b (Hist1h1b), mRNA.	-0.993155	0.356935	0.851276	0.249048	10.6321	8	0	0	-1.84443	0	-0.970127	-0.482989	-1.11162	-0.680616	-1.36123	-1.35234	0.719758	1.2136	0.838458	0.557763	0.587288	1.09151	0.950552
26749	10606071	NM_146235	Ercc6l	Mus musculus excision repair cross-complementing rodent repair deficiency complementation group 6 - like (Ercc6l), mRNA.	-0.993076	0.196438	0.851208	0.369227	11.4583	9	0	0	-1.84428	0	-1.09862	-0.886	-0.82495	-1.13275	-0.760974	-1.25516	0.618535	0.45222	0.365918	1.21579	0.936775	1.12725	1.24197
13511	10480628	NM_146116	Tubb4b	Mus musculus tubulin, beta 4B class IVB (Tubb4b), mRNA.	-0.992723	0.296188	0.850905	0.310938	10.9336	10	0	0	-1.84363	0	-1.17043	-1.33235	-1.17146	-1.00595	-0.574684	-0.701461	0.542617	0.990893	0.41867	0.78189	1.34292	1.02919	0.850157
3546	10381526	NM_001110130	Ppih	Mus musculus peptidyl prolyl isomerase H (Ppih), transcript variant 3, mRNA.	-0.992514	0.209982	0.850726	0.365809	11.3304	9	0	0	-1.84324	0	-1.17571	-1.0405	-1.20477	-1.06591	-0.716791	-0.751403	0.641679	0.501062	0.519543	1.13555	0.590491	1.23852	1.32824
5750	10404045	ENSMUST00000090776 // ENSMUST00000090776 // ENSMUST00000090776 // ENSMUST00000090776 // ENSMUST00000090776 // ENSMUST00000090776 // ENSMUST00000090776 // ENSMUST00000090776 // ENSMUST00000090776 // ENSMUST00000090776	Hist1h2ao // Hist1h2ai // Hist1h2ab // Hist1h2ap // Hist1h2an // Hist1h2ah // Hist1h2ag // Hist1h2ae // Hist1h2ad // Hist1h2ac	cdna:known chromosome:NCBIM37:13:23666250:23666821:1 gene:ENSMUSG00000071478 gene_biotype:protein_coding transcript_biotype:protein_coding	-0.992447	0.405991	0.850669	0.182883	10.2634	6	0	0	-1.84312	0	-0.88701	-0.473587	-0.838983	-0.794051	-1.43333	-1.52772	0.60467	1.06177	0.786567	0.755026	0.718902	0.937366	1.09039
27833	10455439	---	---	---	-0.992376	0.31968	0.850608	0.293091	10.766	10	0	0	-1.84298	0	-0.913415	-0.9144	-0.633811	-0.737217	-1.31437	-1.44105	1.26636	0.932894	0.300931	0.820413	0.777629	0.840192	1.01584
3939	10385686	NM_001048061	Hnrnpab	Mus musculus heterogeneous nuclear ribonucleoprotein A/B (Hnrnpab), transcript variant 1, mRNA.	-0.992366	0.138772	0.850599	0.393771	11.5728	7	0	0	-1.84297	0	-1.01886	-1.08139	-0.819774	-0.818425	-1.12947	-1.08627	0.697653	0.607761	0.210315	0.792631	1.3671	1.16282	1.11592
1496	10360745	NM_133815	Lbr	Mus musculus lamin B receptor (Lbr), mRNA.	-0.992324	0.222293	0.850563	0.360669	11.2533	10	0	0	-1.84289	0	-1.16467	-0.955244	-1.24435	-1.12148	-0.699235	-0.768961	1.06143	0.778336	0.167262	0.626108	1.0736	1.03793	1.20929
9550	10441244	NM_020622	Fam3b	Mus musculus family with sequence similarity 3, member B (Fam3b), mRNA.	-0.992311	0.187142	0.850552	0.376991	11.3983	9	0	0	-1.84286	0	-1.03153	-1.08138	-1.12008	-1.01335	-0.61873	-1.08879	0.893823	0.199316	0.608503	1.23354	1.26477	0.72121	1.0327
10760	10453252	NM_010439	Hmgb1	Mus musculus high mobility group box 1 (Hmgb1), mRNA.	-0.99229	0.241841	0.850534	0.350208	11.1597	10	0	0	-1.84282	0	-1.16887	-0.821937	-0.762656	-0.742265	-1.27862	-1.17939	1.11814	0.802426	0.197977	0.845538	0.716982	0.970678	1.302
13023	10475610	NM_023595	Dut	Mus musculus deoxyuridine triphosphatase (Dut), nuclear gene encoding mitochondrial protein, transcript variant 2, mRNA.	-0.992271	0.22727	0.850518	0.358345	11.2246	10	0	0	-1.84279	0	-1.17549	-1.24425	-1.13104	-0.806332	-0.671615	-0.924888	0.960891	0.239692	0.492449	0.955368	1.10839	1.26659	0.930247
15583	10500896	NM_008211	H3f3b	Mus musculus H3 histone, family 3B (H3f3b), mRNA.	-0.992169	0.339997	0.850431	0.274767	10.6291	9	0	0	-1.8426	0	-0.79932	-0.86199	-0.823176	-0.630727	-1.43392	-1.40388	0.907637	1.03176	0.644429	0.36867	1.22226	0.866262	0.911999
9732	10443007	NM_001081656	Neurl1b	Mus musculus neuralized homolog 1b (Drosophila) (Neurl1b), mRNA.	-0.992099	0.202249	0.850371	0.371484	11.3114	9	0	0	-1.84247	0	-1.31906	-0.955881	-1.15436	-0.858229	-0.808674	-0.856394	0.949549	0.587721	0.695004	0.744961	0.399227	1.03583	1.5403
2830	10374400	NM_176982	Fbxo48	Mus musculus F-box protein 48 (Fbxo48), mRNA.	-0.992073	0.156074	0.850348	0.389725	11.4798	8	0	0	-1.84242	0	-1.21724	-0.896315	-0.919205	-1.13368	-0.800983	-0.985017	0.830911	0.307646	0.552425	1.23227	0.73288	1.45687	0.839436
14998	10495316	NM_019976	Psrc1	Mus musculus proline/serine-rich coiled-coil 1 (Psrc1), transcript variant 2, mRNA.	-0.991981	0.191689	0.85027	0.376697	11.3392	9	0	0	-1.84225	0	-0.820952	-0.95928	-0.833159	-1.01171	-1.34917	-0.977621	0.489676	1.0389	0.444018	0.906178	0.775603	1.55733	0.740183
6429	10410092	NM_175494	Zfp367	Mus musculus zinc finger protein 367 (Zfp367), mRNA.	-0.991603	0.15891	0.849945	0.390988	11.4104	8	0	0	-1.84155	0	-1.197	-0.834165	-1.05465	-0.775698	-1.00409	-1.08402	1.0614	0.77148	0.11137	1.11419	0.84062	1.33306	0.717487
4134	10387871	NM_029231	Pelp1	Mus musculus proline, glutamic acid and leucine rich protein 1 (Pelp1), mRNA.	-0.991578	0.397933	0.849924	0.205055	10.2308	7	0	0	-1.8415	0	-0.766393	-1.21037	-1.22073	-1.4901	-0.374011	-0.887873	0.948393	0.413043	0.835634	0.820755	0.944038	1.0081	0.979502
18112	10526217	NM_020022	Rfc2	Mus musculus replication factor C (activator 1) 2 (Rfc2), mRNA.	-0.991538	0.111658	0.84989	0.404677	11.5377	7	0	0	-1.84143	0	-1.01727	-1.10575	-1.12341	-0.867893	-0.867568	-0.967343	0.220565	0.596332	0.600165	1.18592	0.860019	1.38023	1.10599
20990	10553857	L38477	Hmgb1	Mus musculus (clone Clebp-1) high mobility group 1 protein (HMG-1) mRNA, complete cds.	-0.991478	0.290286	0.849838	0.322728	10.8269	10	0	0	-1.84132	0	-0.886105	-1.10949	-0.671239	-0.744532	-1.07	-1.4675	1.33449	0.983942	0.286323	0.954912	0.657996	0.810098	0.92111
24180	10582599	NM_172288	Nup133	Mus musculus nucleoporin 133 (Nup133), mRNA.	-0.99146	0.203645	0.849823	0.374008	11.2275	9	0	0	-1.84128	0	-1.2103	-1.04895	-1.13991	-1.04266	-0.658026	-0.848906	0.684258	0.518248	0.319417	0.948314	0.964605	1.43891	1.07501
19139	10537246	NM_027513	Nup205	Mus musculus nucleoporin 205 (Nup205), mRNA.	-0.991335	0.2185	0.849716	0.367583	11.1508	9	0	0	-1.84105	0	-1.18866	-1.02742	-1.17492	-1.11803	-0.740819	-0.698151	0.798693	1.06559	0.195337	1.12731	0.580374	0.906135	1.27456
16857	10513362	NM_001163288	Susd1	Mus musculus sushi domain containing 1 (Susd1), mRNA.	-0.991019	0.279559	0.849445	0.333073	10.8312	10	0	0	-1.84046	0	-1.16578	-0.907756	-1.1181	-1.31325	-0.929283	-0.511956	1.09783	0.664638	0.247118	1.06144	1.10968	0.668106	1.0973
2940	10375485	---	---	cdna:pseudogene chromosome:NCBIM37:11:48408781:48409311:1 gene:ENSMUSG00000082250 gene_biotype:pseudogene transcript_biotype:transcribed_processed_pseudogene	-0.990809	0.0706656	0.849265	0.415542	11.523	6	0	0	-1.84007	0	-0.977329	-1.04005	-1.06156	-0.97485	-1.02616	-0.864905	0.768926	1.11848	0.291478	0.821605	0.512235	0.853748	1.57839
45	10344939	NM_009352	Terf1	Mus musculus telomeric repeat binding factor 1 (Terf1), mRNA.	-0.990618	0.124712	0.849101	0.405685	11.3868	7	0	0	-1.83972	0	-1.18993	-0.992707	-1.02686	-1.00039	-0.921784	-0.812039	0.569052	0.969121	0.22842	0.927628	0.626515	1.19726	1.42571
8661	10432636	NM_174992	Smagp	Mus musculus small cell adhesion glycoprotein (Smagp), transcript variant 1, mRNA.	-0.990345	0.156641	0.848867	0.397616	11.2611	8	0	0	-1.83921	0	-1.1563	-0.909926	-0.788479	-0.86086	-1.09152	-1.13499	1.38111	1.02495	0.117186	1.09493	0.892332	0.692553	0.738998
5340	10400153	NM_010439	Hmgb1	Mus musculus high mobility group box 1 (Hmgb1), mRNA.	-0.990245	0.185181	0.848782	0.387732	11.1524	8	0	0	-1.83903	0	-1.00969	-1.02484	-0.837035	-0.789242	-0.965752	-1.31491	1.43345	0.823182	0.255191	1.11262	0.499799	0.974227	0.842999
12096	10466745	NM_001198985	Tjp2	Mus musculus tight junction protein 2 (Tjp2), transcript variant 1, mRNA.	-0.9902	0.312789	0.848743	0.312328	10.5746	10	0	0	-1.83894	0	-1.23716	-1.27375	-1.25114	-0.943142	-0.603277	-0.632732	1.08172	0.64742	0.34969	0.680912	1.10478	1.23304	0.84364
10178	10447602	NM_009510	Ezr	Mus musculus ezrin (Ezr), mRNA.	-0.990181	0.23372	0.848726	0.365554	10.9517	10	0	0	-1.83891	0	-1.1567	-0.986822	-1.07845	-0.542016	-1.18179	-0.9953	0.977614	0.537647	0.396942	0.652034	1.49979	0.991412	0.885649
16961	10514347	NM_007670	Cdkn2b	Mus musculus cyclin-dependent kinase inhibitor 2B (p15, inhibits CDK4) (Cdkn2b), mRNA.	-0.990055	0.231722	0.848618	0.367242	10.9461	10	0	0	-1.83867	0	-1.18307	-1.05508	-1.3084	-0.896924	-0.738163	-0.758693	0.803015	0.334108	0.403815	1.10562	1.29338	1.13198	0.868409
6203	10408118	NM_178186	Hist1h2ag	Mus musculus histone cluster 1, H2ag (Hist1h2ag), mRNA.	-0.990011	0.420313	0.848581	0.180427	9.95736	6	0	0	-1.83859	0	-0.860483	-0.473115	-0.805474	-0.80509	-1.41107	-1.58483	0.599062	1.00871	0.796024	0.75472	0.715705	0.961407	1.10444
16400	10508759	NM_011284	Rpa2	Mus musculus replication protein A2 (Rpa2), mRNA.	-0.99	0.269275	0.848571	0.345531	10.7703	10	0	0	-1.83857	0	-1.19456	-0.683505	-1.01121	-0.631665	-1.18193	-1.23713	1.0637	0.547407	0.359373	0.685351	0.806793	1.17832	1.29905
15524	10500329	NM_013549	Hist2h2aa1	Mus musculus histone cluster 2, H2aa1 (Hist2h2aa1), mRNA.	-0.989884	0.3492	0.848472	0.280398	10.3489	9	0	0	-1.83836	0	-0.916434	-0.561188	-0.812066	-0.821835	-1.39039	-1.43739	0.582538	1.38159	0.796252	0.704915	0.64869	0.762141	1.06318
10328	10448975	NM_145409	Chtf18	Mus musculus CTF18, chromosome transmission fidelity factor 18 (Chtf18), mRNA.	-0.989858	0.29423	0.848449	0.32893	10.6339	10	0	0	-1.83831	0	-1.04343	-0.727987	-0.781902	-0.721886	-1.25364	-1.4103	0.770075	0.826175	0.337282	0.897514	0.611169	1.28385	1.21309
6325	10409031	NM_025900	Dek	Mus musculus DEK oncogene (DNA binding) (Dek), mRNA.	-0.989783	0.373658	0.848385	0.253502	10.2041	8	0	0	-1.83817	0	-1.38996	-1.20698	-1.20198	-1.09225	-0.502401	-0.545127	1.16447	0.557212	0.50255	0.838363	0.852843	0.893583	1.12967
18154	10526693	NM_001005426	Zcwpw1	Mus musculus zinc finger, CW type with PWWP domain 1 (Zcwpw1), mRNA.	-0.989692	0.140404	0.848308	0.405608	11.2299	7	0	0	-1.838	0	-1.21596	-0.978111	-0.999178	-1.00246	-0.968464	-0.773981	0.78197	0.593324	0.0943467	1.23026	0.966846	1.24548	1.02593
19296	10538617	NM_133737	Lancl2	Mus musculus LanC (bacterial lantibiotic synthetase component C)-like 2 (Lancl2), mRNA.	-0.989583	0.404098	0.848214	0.21276	10.0137	7	0	0	-1.8378	0	-1.16062	-1.19849	-1.36463	-1.23385	-0.341635	-0.638273	0.800564	0.674763	0.555234	0.878312	1.07278	0.792962	1.16289
17141	10515884	NM_028677	Ppih	Mus musculus peptidyl prolyl isomerase H (Ppih), transcript variant 1, mRNA.	-0.989569	0.229184	0.848202	0.370981	10.9023	10	0	0	-1.83777	0	-1.13572	-1.09632	-1.21202	-1.09563	-0.706498	-0.691228	0.582101	0.494642	0.486603	1.16778	0.66185	1.23511	1.30932
21351	10557069	NM_021554	Mettl9	Mus musculus methyltransferase like 9 (Mettl9), mRNA.	-0.989348	0.325054	0.848013	0.306855	10.4252	10	0	0	-1.83736	0	-1.24961	-1.12819	-1.1853	-0.881479	-0.37658	-1.11493	1.09817	0.474171	0.708328	0.521476	0.978181	0.83928	1.31649
392	10348929	NM_133834	Hnrnpf	Mus musculus heterogeneous nuclear ribonucleoprotein F (Hnrnpf), transcript variant 1, mRNA.	-0.989304	0.13867	0.847975	0.407859	11.1877	7	0	0	-1.83728	0	-1.17731	-0.881483	-1.03156	-0.862006	-0.866886	-1.11657	0.727556	1.02332	0.0384276	1.10886	0.759752	0.977244	1.30066
9579	10441620	ENSMUST00000097419	Fgfr1op	cdna:known chromosome:NCBIM37:17:8358366:8389669:1 gene:ENSMUSG00000069135 gene_biotype:protein_coding transcript_biotype:protein_coding	-0.989281	0.129933	0.847955	0.410349	11.2083	7	0	0	-1.83724	0	-1.04675	-1.05147	-1.11603	-1.06921	-0.798362	-0.853861	1.17928	0.432116	0.322474	0.741106	0.716357	1.09494	1.44941
21297	10556266	NM_009516	Wee1	Mus musculus WEE 1 homolog 1 (S. pombe) (Wee1), mRNA.	-0.989157	0.33053	0.847849	0.3031	10.378	10	0	0	-1.83701	0	-1.40215	-1.11005	-1.26048	-0.898553	-0.741223	-0.52249	0.739002	0.889374	0.529774	1.09721	0.4107	1.03717	1.23171
20063	10545534	NM_153762	Rnf26	Mus musculus ring finger protein 26 (Rnf26), mRNA.	-0.989113	0.199972	0.847811	0.386978	10.9664	9	0	0	-1.83692	0	-0.991825	-0.908482	-0.672829	-1.14973	-0.963915	-1.24789	0.408973	0.958395	0.457953	1.0042	0.536216	1.14513	1.4238
15201	10497483	NM_010439	Hmgb1	Mus musculus high mobility group box 1 (Hmgb1), mRNA.	-0.989043	0.24279	0.847751	0.366345	10.7866	10	0	0	-1.83679	0	-0.862679	-0.996549	-0.725191	-0.801183	-1.20008	-1.34857	1.13236	0.679911	0.263554	0.793054	0.626985	1.10275	1.33564
19683	10542310	ENSMUST00000067327	Cdkn1b	cdna:known chromosome:NCBIM37:6:134870419:134875531:1 gene:ENSMUSG00000003031 gene_biotype:protein_coding transcript_biotype:protein_coding	-0.989042	0.258921	0.847751	0.357026	10.7155	10	0	0	-1.83679	0	-1.2291	-1.33612	-1.00731	-0.64868	-0.9104	-0.802646	0.828532	1.11505	0.308702	1.11423	0.416357	0.931837	1.21955
20902	10552740	ENSMUST00000107891	Nup62	cdna:known chromosome:NCBIM37:7:52071458:52086179:1 gene:ENSMUSG00000043858 gene_biotype:protein_coding transcript_biotype:protein_coding	-0.988878	0.197872	0.84761	0.388987	10.9475	9	0	0	-1.83649	0	-1.22127	-0.97556	-1.10604	-0.998957	-0.631615	-0.99983	0.821611	0.755131	0.312729	0.492828	0.893083	1.43199	1.22589
23293	10573461	NM_010062	Dnase2a	Mus musculus deoxyribonuclease II alpha (Dnase2a), mRNA.	-0.988844	0.278962	0.84758	0.345272	10.6025	10	0	0	-1.83642	0	-0.950114	-0.646985	-0.937774	-0.795025	-1.1694	-1.43377	1.26539	0.79499	0.803006	1.27208	0.281889	0.658717	0.856998
1242	10358177	NM_028872	5730559C18Rik	Mus musculus RIKEN cDNA 5730559C18 gene (5730559C18Rik), mRNA.	-0.988755	0.27895	0.847504	0.345754	10.5934	10	0	0	-1.83626	0	-1.04644	-1.24636	-1.08497	-0.541009	-1.24032	-0.773441	0.320514	1.34263	0.559402	0.885284	0.705721	1.05971	1.05927
16098	10505674	NM_175275	Cntln	Mus musculus centlein, centrosomal protein (Cntln), transcript variant 1, mRNA.	-0.98869	0.222752	0.847448	0.378523	10.8312	9	0	0	-1.83614	0	-0.980232	-1.05191	-1.06931	-1.2334	-0.569071	-1.02822	1.53479	0.626808	0.367006	1.13453	0.770353	0.756987	0.741666
16880	10513592	NM_023597	Wdr31	Mus musculus WD repeat domain 31 (Wdr31), mRNA.	-0.988547	0.202486	0.847326	0.388571	10.8933	9	0	0	-1.83587	0	-0.961091	-0.784985	-0.826909	-0.958363	-1.04768	-1.35225	0.655591	0.817186	0.163771	0.805652	0.917659	1.21513	1.35629
24741	10587655	NM_001142943	Zfp949	Mus musculus zinc finger protein 949 (Zfp949), transcript variant 1, mRNA.	-0.988263	0.182335	0.847082	0.398111	10.9327	8	0	0	-1.83534	0	-1.17785	-1.10059	-1.17711	-0.845759	-0.837109	-0.791155	1.17917	0.653536	0.114674	0.821263	1.06551	1.31031	0.785122
15525	10500333	NM_033596	Hist2h4	Mus musculus histone cluster 2, H4 (Hist2h4), mRNA.	-0.988223	0.196541	0.847048	0.392624	10.8788	9	0	0	-1.83527	0	-0.963463	-0.829299	-0.829852	-0.845278	-1.18519	-1.27625	0.64309	1.53053	0.931101	0.580343	0.525917	0.516716	1.20164
17496	10519488	NM_146116	Tubb4b	Mus musculus tubulin, beta 4B class IVB (Tubb4b), mRNA.	-0.988176	0.225655	0.847008	0.37958	10.7637	9	0	0	-1.83518	0	-0.994181	-1.25885	-1.21799	-0.97274	-0.68068	-0.804617	0.381207	1.07245	0.333784	0.750727	1.35356	1.08384	0.953493
4726	10394186	ENSMUST00000164607	Dtnb	cdna:known chromosome:NCBIM37:12:3572433:3781398:1 gene:ENSMUSG00000071454 gene_biotype:protein_coding transcript_biotype:nonsense_mediated_decay	-0.988157	0.210183	0.846991	0.387004	10.8214	9	0	0	-1.83515	0	-1.30799	-1.06466	-1.05803	-0.973574	-0.709133	-0.815552	1.01642	0.194112	0.615628	1.04528	0.648985	1.3721	1.03642
19471	10540191	NM_011630	Nr2c2	Mus musculus nuclear receptor subfamily 2, group C, member 2 (Nr2c2), mRNA.	-0.988002	0.333701	0.846859	0.307176	10.2509	10	0	0	-1.83486	0	-1.2706	-0.91873	-0.772609	-1.49633	-0.874828	-0.594912	1.42396	0.87831	0.481455	0.630474	0.920204	0.652967	0.940648
26652	10605303	NM_027109	Dnase1l1	Mus musculus deoxyribonuclease 1-like 1 (Dnase1l1), transcript variant 1, mRNA.	-0.987934	0.0800854	0.846801	0.426682	11.1499	6	0	0	-1.83474	0	-1.02348	-0.839257	-1.07647	-1.01466	-0.978364	-0.995378	1.36233	0.505717	0.954536	1.12233	0.734677	1.12942	0.118602
15835	10503264	NM_009830	Ccne2	Mus musculus cyclin E2 (Ccne2), transcript variant 2, mRNA.	-0.987841	0.131344	0.846721	0.416376	11.0343	7	0	0	-1.83456	0	-1.17067	-1.10425	-0.984362	-0.944464	-0.914263	-0.809036	0.778012	0.392862	0.226408	1.26453	0.885112	1.31835	1.06178
8411	10429674	NM_031201	Tsta3	Mus musculus tissue specific transplantation antigen P35B (Tsta3), mRNA.	-0.987813	0.330249	0.846697	0.311386	10.2506	10	0	0	-1.83451	0	-1.41049	-1.17209	-0.928712	-0.77758	-0.481347	-1.15666	0.960981	0.532909	0.545389	0.744842	1.26362	0.641233	1.2379
17315	10517609	NM_028176	Cda	Mus musculus cytidine deaminase (Cda), mRNA.	-0.987775	0.189203	0.846664	0.397688	10.8549	8	0	0	-1.83444	0	-1.06934	-1.08556	-1.11151	-1.02001	-0.607741	-1.03248	1.23014	0.131985	1.21719	0.947906	1.08689	0.574519	0.73802
11057	10456357	NM_021451	Pmaip1	Mus musculus phorbol-12-myristate-13-acetate-induced protein 1 (Pmaip1), mRNA.	-0.987619	0.124228	0.846531	0.419164	11.0259	7	0	0	-1.83415	0	-1.06691	-0.994443	-0.920676	-1.17254	-0.960814	-0.810326	0.702187	0.544909	0.308998	0.753219	0.85578	1.57371	1.18691
9731	10443000	NM_001081656	Neurl1b	Mus musculus neuralized homolog 1b (Drosophila) (Neurl1b), mRNA.	-0.987452	0.23583	0.846387	0.377924	10.6458	10	0	0	-1.83384	0	-0.671954	-0.904986	-0.919073	-0.936136	-1.1229	-1.36966	0.73615	0.891065	0.58654	0.596828	0.415562	1.24538	1.45319
16858	10513381	NM_144904	Rod1	Mus musculus ROD1 regulator of differentiation 1 (S. pombe) (Rod1), transcript variant 1, mRNA.	-0.987328	0.362327	0.846281	0.283244	10.0419	9	0	0	-1.83361	0	-1.21354	-1.14638	-1.24975	-1.2686	-0.507321	-0.538381	1.14327	0.413914	0.629922	1.06846	1.14889	0.717934	0.801576
647	10351623	NM_172647	F11r	Mus musculus F11 receptor (F11r), mRNA.	-0.987248	0.402014	0.846212	0.235034	9.8245	7	0	0	-1.83346	0	-1.40028	-1.40398	-1.24371	-0.678807	-0.613124	-0.583588	0.68782	0.799384	0.506522	0.763072	0.926321	1.23271	1.00766
29184	10338880	---	---	---	-0.987243	0.331012	0.846208	0.314054	10.1935	10	0	0	-1.83345	0	-1.39176	-1.34313	-1.06856	-0.648226	-0.805352	-0.666425	0.583682	0.734689	0.341344	1.06832	1.15208	1.18147	0.861875
7417	10419542	NM_001033271	Tmem55b	Mus musculus transmembrane protein 55b (Tmem55b), mRNA.	-0.986967	0.144536	0.845972	0.416583	10.9008	7	0	0	-1.83294	0	-1.10794	-1.10398	-1.09128	-0.74666	-0.902076	-0.969868	0.301483	1.149	0.2528	0.819084	1.03645	1.32104	1.04194
23269	10573203	NM_018771	Gipc1	Mus musculus GIPC PDZ domain containing family, member 1 (Gipc1), mRNA.	-0.986958	0.137099	0.845964	0.418712	10.9191	7	0	0	-1.83292	0	-1.06777	-1.17943	-0.892515	-0.950384	-0.793296	-1.03835	0.67277	0.867945	-0.00704657	1.13473	1.11813	1.20564	0.92959
22712	10567851	NM_010900	Nfatc2ip	Mus musculus nuclear factor of activated T cells, cytoplasmic, calcineurin dependent 2 interacting protein (Nfatc2ip), mRNA.	-0.986812	0.243418	0.845839	0.377015	10.549	10	0	0	-1.83265	0	-1.12742	-1.14467	-1.236	-1.04117	-0.634279	-0.737329	0.702675	0.539586	0.23761	0.98734	0.940029	1.28776	1.22587
19553	10541104	NM_133834	Hnrnpf	Mus musculus heterogeneous nuclear ribonucleoprotein F (Hnrnpf), transcript variant 1, mRNA.	-0.986766	0.150163	0.845799	0.415809	10.8632	7	0	0	-1.83256	0	-1.18691	-0.847954	-1.04124	-0.836935	-0.886683	-1.12088	0.664089	1.04706	0.0319062	1.12925	0.768552	0.994658	1.28508
16900	10513824	ENSMUST00000144099	Cdk5rap2	cdna:known chromosome:NCBIM37:4:69877890:70071477:-1 gene:ENSMUSG00000039298 gene_biotype:protein_coding transcript_biotype:protein_coding	-0.986663	0.125909	0.845711	0.422912	10.913	7	0	0	-1.83237	0	-1.15438	-0.981611	-0.886634	-0.82824	-1.11012	-0.958992	0.446739	0.655277	0.344853	1.13172	0.648989	1.29449	1.39791
13442	10479833	ENSMUST00000114996	Optn	cdna:known chromosome:NCBIM37:2:4941688:4985091:-1 gene:ENSMUSG00000026672 gene_biotype:protein_coding transcript_biotype:protein_coding	-0.986588	0.230766	0.845647	0.384659	10.5761	9	0	0	-1.83223	0	-1.09591	-1.28609	-1.15993	-0.909276	-0.758142	-0.710181	1.10586	0.445914	0.518728	1.41765	0.830213	1.13368	0.467479
9679	10442381	NM_175440	Prss27	Mus musculus protease, serine, 27 (Prss27), mRNA.	-0.986435	0.212238	0.845516	0.39416	10.6297	9	0	0	-1.83195	0	-1.09777	-0.789007	-0.814162	-0.814266	-1.09718	-1.30623	0.919865	0.657509	0.100501	0.733951	1.13781	1.11906	1.24992
10489	10450605	NM_011655	Tubb5	Mus musculus tubulin, beta 5 class I (Tubb5), mRNA.	-0.98631	0.24811	0.845409	0.376906	10.4792	10	0	0	-1.83172	0	-1.00611	-0.617276	-0.944743	-1.2234	-0.837933	-1.2884	0.741769	1.15813	1.00672	0.549425	1.40461	0.286999	0.770206
20005	10545168	NM_020047	Tacstd2	Mus musculus tumor-associated calcium signal transducer 2 (Tacstd2), mRNA.	-0.986173	0.275212	0.845291	0.36158	10.3519	10	0	0	-1.83146	0	-1.31436	-1.02672	-1.18963	-1.05539	-0.572021	-0.758914	1.04055	0.957	0.0879011	1.1641	0.801762	0.789117	1.0766
19710	10542557	NM_001005605	Aebp2	Mus musculus AE binding protein 2 (Aebp2), transcript variant 1, mRNA.	-0.986147	0.194301	0.845269	0.403106	10.6619	8	0	0	-1.83142	0	-0.914244	-1.13209	-1.30056	-0.947853	-0.792848	-0.829283	0.690371	0.324307	0.36371	1.00485	1.07967	1.03225	1.42173
22656	10567412	NM_027698	Eri2	Mus musculus exoribonuclease 2 (Eri2), mRNA.	-0.98592	0.259603	0.845074	0.372325	10.3933	10	0	0	-1.83099	0	-1.23231	-1.13088	-1.05443	-1.17156	-0.600896	-0.725445	0.628038	0.701279	0.287728	1.15743	0.662277	1.31488	1.16388
20585	10550345	NM_133789	Strn4	Mus musculus striatin, calmodulin binding protein 4 (Strn4), transcript variant 1, mRNA.	-0.985819	0.186948	0.844987	0.407472	10.6514	8	0	0	-1.83081	0	-0.8858	-1.22088	-1.21343	-0.959351	-0.833084	-0.802365	0.902128	0.582631	0.403166	0.456809	1.17869	0.863482	1.52801
9211	10438308	NM_011239	Ranbp1	Mus musculus RAN binding protein 1 (Ranbp1), mRNA.	-0.985796	0.12846	0.844968	0.426013	10.811	7	0	0	-1.83076	0	-1.016	-1.00385	-0.99858	-0.88206	-0.820816	-1.19347	0.756139	0.413876	0.360629	0.668255	1.55969	1.1483	1.00789
5947	10405868	---	---	cdna:known chromosome:NCBIM37:13:65517533:65518081:1 gene:ENSMUSG00000074839 gene_biotype:pseudogene transcript_biotype:retrotransposed	-0.985683	0.253305	0.844871	0.377076	10.3958	10	0	0	-1.83055	0	-0.929661	-0.895785	-0.711452	-0.812493	-1.16324	-1.40146	0.856204	0.895437	0.351888	1.13319	0.481393	0.734664	1.46132
16992	10514590	NM_026082	Dock7	Mus musculus dedicator of cytokinesis 7 (Dock7), mRNA.	-0.985657	0.372133	0.844849	0.283453	9.84678	9	0	0	-1.83051	0	-1.28639	-1.40359	-1.11294	-1.02167	-0.646888	-0.442474	1.11219	0.67058	0.747313	0.936206	1.23509	0.825675	0.386896
19571	10541307	NM_011909	Usp18	Mus musculus ubiquitin specific peptidase 18 (Usp18), mRNA.	-0.985619	0.267784	0.844816	0.368958	10.33	10	0	0	-1.83044	0	-1.34669	-1.11546	-1.04404	-0.889177	-0.978325	-0.540033	0.138142	1.23118	1.03638	1.09669	0.638515	0.78162	0.991194
6642	10412378	NM_008210	H3f3a	Mus musculus H3 histone, family 3A (H3f3a), mRNA.	-0.985595	0.164985	0.844796	0.416284	10.6946	8	0	0	-1.83039	0	-1.20024	-0.980093	-1.0489	-0.964329	-0.695701	-1.0243	1.39401	0.97263	1.30934	0.842937	0.661649	0.280185	0.45282
24714	10587350	NM_001191044	Ddx43	Mus musculus DEAD (Asp-Glu-Ala-Asp) box polypeptide 43 (Ddx43), mRNA.	-0.985533	0.0640845	0.844743	0.439067	10.8944	6	0	0	-1.83028	0	-1.07495	-1.04716	-0.928857	-0.995153	-0.929831	-0.937241	1.03836	0.352448	0.2044	0.895301	0.798918	1.19854	1.42523
6199	10408094	ENSMUST00000081342 // ENSMUST00000081342 // ENSMUST00000081342 // ENSMUST00000081342 // ENSMUST00000081342 // ENSMUST00000081342 // ENSMUST00000081342 // ENSMUST00000081342 // ENSMUST00000081342 // ENSMUST00000081342	Hist1h2ao // Hist1h2ai // Hist1h2ab // Hist1h2ap // Hist1h2an // Hist1h2ah // Hist1h2ag // Hist1h2ae // Hist1h2ad // Hist1h2ac	cdna:known chromosome:NCBIM37:13:21902236:21902754:1 gene:ENSMUSG00000060262 gene_biotype:protein_coding transcript_biotype:protein_coding	-0.985525	0.435298	0.844736	0.195774	9.50787	6	0	0	-1.83026	0	-0.840127	-0.449904	-0.80893	-0.789422	-1.42698	-1.59779	0.589431	1.07254	0.771177	0.736036	0.699136	0.947176	1.09765
6242	10408280	NM_026825	Lrrc16a	Mus musculus leucine rich repeat containing 16A (Lrrc16a), mRNA.	-0.985361	0.282696	0.844596	0.360879	10.2419	10	0	0	-1.82996	0	-1.35087	-1.16018	-0.999734	-1.04373	-0.82697	-0.530689	0.649644	0.801111	0.306904	0.831367	0.944145	1.50918	0.869817
16434	10509071	NM_178257	Il22ra1	Mus musculus interleukin 22 receptor, alpha 1 (Il22ra1), mRNA.	-0.985301	0.19497	0.844544	0.406661	10.5716	8	0	0	-1.82985	0	-0.786482	-1.06131	-1.03049	-0.74854	-1.27895	-1.00604	0.363222	0.211592	1.16411	0.843937	0.958053	1.10638	1.26451
2472	10370632	NM_144528	Rnf126	Mus musculus ring finger protein 126 (Rnf126), transcript variant 1, mRNA.	-0.98525	0.145252	0.8445	0.423859	10.7112	7	0	0	-1.82975	0	-0.934732	-1.1921	-1.0602	-0.996488	-0.752182	-0.975804	0.086517	1.03056	0.473759	1.08728	0.808099	1.21056	1.21473
2057	10366446	NM_146010	Tspan8	Mus musculus tetraspanin 8 (Tspan8), transcript variant 1, mRNA.	-0.985148	0.292045	0.844412	0.355722	10.1812	10	0	0	-1.82956	0	-1.36605	-1.17357	-1.15021	-0.891844	-0.711634	-0.617582	0.225967	0.618458	0.986072	0.667102	1.03522	1.20032	1.17775
23927	10580085	NM_172502	Dcaf15	Mus musculus DDB1 and CUL4 associated factor 15 (Dcaf15), mRNA.	-0.98505	0.326438	0.844329	0.330408	10.0165	10	0	0	-1.82938	0	-1.38313	-1.23917	-0.746506	-0.942666	-0.497632	-1.1012	0.443943	0.482507	0.677078	0.838644	1.1965	0.99119	1.28044
28501	10569994	---	---	---	-0.984894	0.334127	0.844195	0.324817	9.96676	10	0	0	-1.82909	0	-0.847748	-0.8365	-0.732925	-0.678652	-1.36125	-1.45229	1.07639	0.8373	0.222619	0.881987	0.674837	1.00018	1.21605
2108	10366983	NM_001113211	Tmem194	Mus musculus transmembrane protein 194 (Tmem194), transcript variant 1, mRNA.	-0.984807	0.266215	0.844121	0.373899	10.2588	10	0	0	-1.82893	0	-1.25626	-1.13842	-1.23455	-0.923527	-0.714987	-0.641098	0.806564	0.319213	0.402962	1.23649	0.833794	1.0549	1.25491
4308	10389590	NM_025638	Gdpd1	Mus musculus glycerophosphodiester phosphodiesterase domain containing 1 (Gdpd1), mRNA.	-0.984716	0.242342	0.844042	0.387621	10.3446	10	0	0	-1.82876	0	-1.3273	-1.07755	-1.17518	-0.789794	-0.752888	-0.785588	0.960292	0.934528	0.38387	1.44816	0.858369	0.317836	1.00524
8741	10433462	NM_016881	Pmm2	Mus musculus phosphomannomutase 2 (Pmm2), mRNA.	-0.984618	0.288481	0.843958	0.360831	10.1478	10	0	0	-1.82858	0	-1.23518	-1.15885	-1.10567	-0.763579	-0.500729	-1.14371	0.680741	0.568874	0.248353	0.959754	1.29078	1.07637	1.08284
8941	10435704	NM_009855	Cd80	Mus musculus CD80 antigen (Cd80), mRNA.	-0.984585	0.232298	0.84393	0.393322	10.3695	9	0	0	-1.82852	0	-1.11097	-0.664395	-1.18719	-0.874486	-1.25089	-0.819576	0.898923	0.546851	0.841984	1.34671	1.27771	0.777105	0.218223
11884	10464659	AF045663	Rad9	Mus musculus radio-resistance/chemo-resistance/cell cycle checkpoint control protein (Rad9) mRNA, complete cds.	-0.984515	0.305618	0.84387	0.349414	10.0636	10	0	0	-1.82839	0	-1.32913	-0.866849	-1.37228	-0.834014	-0.588623	-0.916198	0.553715	0.365049	0.62834	1.36833	1.12802	0.905782	0.957851
1563	10361651	NM_145706	Nup43	Mus musculus nucleoporin 43 (Nup43), mRNA.	-0.984474	0.201459	0.843835	0.407747	10.4662	9	0	0	-1.82831	0	-1.21052	-1.04218	-1.20066	-0.9287	-0.759828	-0.764955	0.604223	0.261574	0.459427	0.952714	1.12246	1.13354	1.37291
1468	10360460	NM_021350	Chml	Mus musculus choroideremia-like (Chml), mRNA.	-0.984329	0.251608	0.843711	0.384514	10.2717	10	0	0	-1.82804	0	-1.26348	-0.978339	-1.30928	-0.863873	-0.698618	-0.792392	0.456299	0.888351	0.211242	1.08814	0.842072	1.26917	1.15071
20403	10548785	NM_001166630	Dynlt1c	Mus musculus dynein light chain Tctex-type 1C (Dynlt1c), mRNA.	-0.984327	0.420905	0.843709	0.230173	9.49128	7	0	0	-1.82804	0	-1.01635	-0.624861	-0.831692	-0.531553	-1.23609	-1.66541	0.778414	0.961958	0.738888	0.792445	1.2881	0.796159	0.549996
8007	10425890	NM_001164627	Arhgap8	Mus musculus Rho GTPase activating protein 8 (Arhgap8), transcript variant 1, mRNA.	-0.984138	0.29003	0.843547	0.362225	10.0973	10	0	0	-1.82769	0	-1.00071	-0.912664	-1.31826	-1.17016	-1.03502	-0.468024	1.20646	0.978464	0.239884	1.10308	1.12564	0.750199	0.501095
6302	10408798	NM_001122948	Tfap2a	Mus musculus transcription factor AP-2, alpha (Tfap2a), transcript variant 2, mRNA.	-0.984041	0.271948	0.843464	0.374206	10.1638	10	0	0	-1.82751	0	-1.31231	-1.21549	-1.0827	-0.953757	-0.686593	-0.6534	0.611632	0.276519	0.515992	1.03659	1.28061	1.14792	1.03498
8639	10432411	NM_016766	Mcrs1	Mus musculus microspherule protein 1 (Mcrs1), transcript variant 1, mRNA.	-0.983853	0.211069	0.843303	0.406475	10.3728	9	0	0	-1.82716	0	-1.08015	-1.1755	-0.76658	-1.02547	-0.681229	-1.17419	1.10614	0.157201	0.44461	0.826647	1.31909	1.01828	1.03115
4302	10389505	BC096608	Gm9975	Mus musculus hypothetical protein C730049P21, mRNA (cDNA clone IMAGE:5362168).	-0.983817	0.194891	0.843271	0.413314	10.4219	8	0	0	-1.82709	0	-1.13894	-0.997299	-0.666928	-0.981294	-1.22334	-0.895098	0.848439	0.685234	0.574998	0.729016	1.74905	0.544262	0.771896
8136	10427241	NM_001103165	Pcbp2	Mus musculus poly(rC) binding protein 2 (Pcbp2), transcript variant 1, mRNA.	-0.983736	0.285644	0.843202	0.367128	10.0794	10	0	0	-1.82694	0	-1.28198	-0.793221	-0.625867	-1.05361	-1.33224	-0.815489	1.14536	1.0661	0.528917	0.800324	0.188925	1.18823	0.984568
9858	10444595	NM_030597	Lsm2	Mus musculus LSM2 homolog, U6 small nuclear RNA associated (S. cerevisiae) (Lsm2), transcript variant 1, mRNA.	-0.983709	0.253499	0.843179	0.386424	10.2059	10	0	0	-1.82689	0	-1.06814	-1.04239	-1.21241	-1.19706	-0.546723	-0.835533	0.658978	0.225993	0.504575	1.16722	1.26364	1.09768	0.984168
5744	10404024	NM_153173	Hist1h4h	Mus musculus histone cluster 1, H4h (Hist1h4h), mRNA.	-0.983641	0.241189	0.843121	0.393247	10.246	10	0	0	-1.82676	0	-1.00643	-1.24943	-1.02879	-1.20945	-0.632714	-0.775027	0.61996	0.985965	0.47491	0.893791	0.368235	1.04164	1.51735
19639	10542038	NM_010439	Hmgb1	Mus musculus high mobility group box 1 (Hmgb1), mRNA.	-0.983468	0.329744	0.842972	0.336372	9.86393	10	0	0	-1.82644	0	-0.928257	-0.870189	-0.647504	-0.68258	-1.37968	-1.39259	1.20279	0.845749	0.203485	0.90751	0.643468	0.972505	1.1253
23773	10578557	NM_001001184	Ccdc111	Mus musculus coiled-coil domain containing 111 (Ccdc111), mRNA.	-0.983459	0.329783	0.842965	0.336387	9.86301	10	0	0	-1.82642	0	-1.16756	-1.23002	-1.23397	-1.09598	-0.415282	-0.75794	0.99816	0.715802	0.510245	1.05695	0.539661	1.4353	0.644636
5896	10405464	NM_001038018	Grk6	Mus musculus G protein-coupled receptor kinase 6 (Grk6), transcript variant 1, mRNA.	-0.983389	0.067012	0.842905	0.447548	10.658	6	0	0	-1.82629	0	-1.07228	-0.896602	-0.967412	-0.943619	-0.966948	-1.05348	0.974554	0.409725	0.297249	0.432951	1.22308	1.2502	1.31258
25709	10597935	NM_133974	Cdcp1	Mus musculus CUB domain containing protein 1 (Cdcp1), mRNA.	-0.983326	0.34607	0.842851	0.323218	9.7774	10	0	0	-1.82618	0	-1.26287	-1.28436	-1.30487	-0.772147	-0.785095	-0.490609	0.758887	0.330724	0.661369	1.10642	1.30184	1.01682	0.723892
19131	10537146	NM_008012	Akr1b8	Mus musculus aldo-keto reductase family 1, member B8 (Akr1b8), mRNA.	-0.983308	0.20873	0.842836	0.409916	10.3276	9	0	0	-1.82614	0	-0.772163	-1.06966	-1.07841	-1.31596	-0.84206	-0.821599	0.962309	0.793317	0.882784	0.869895	1.59445	0.27725	0.519846
22977	10570470	---	---	Mus musculus cDNA, clone:Y1G0112O15, strand:plus, reference:ENSEMBL:Mouse-Transcript-ENST:ENSMUST00000070012, based on BLAT search.	-0.983133	0.296265	0.842685	0.36309	9.98113	10	0	0	-1.82582	0	-0.792582	-0.895182	-0.816179	-0.695174	-1.26301	-1.43667	1.14283	0.694856	0.159124	0.859664	0.728132	1.13851	1.17568
25001	10590892	NR_037622	Cep57	Mus musculus centrosomal protein 57 (Cep57), transcript variant 2, non-coding RNA.	-0.983039	0.20388	0.842605	0.413137	10.3173	9	0	0	-1.82564	0	-1.19103	-1.02799	-1.05316	-1.1593	-0.702509	-0.764242	1.19243	0.275847	0.682596	1.06881	0.379765	0.924367	1.37442
13437	10479775	NM_015765	Hspa14	Mus musculus heat shock protein 14 (Hspa14), transcript variant 1, mRNA.	-0.983039	0.138865	0.842605	0.435031	10.4967	7	0	0	-1.82564	0	-1.20807	-0.995055	-1.05312	-0.91035	-0.802744	-0.928892	0.677974	0.381429	0.271178	0.897698	0.959691	1.23876	1.47151
3697	10383289	NM_130862	Baiap2	Mus musculus brain-specific angiogenesis inhibitor 1-associated protein 2 (Baiap2), transcript variant 2, mRNA.	-0.983006	0.16236	0.842576	0.42834	10.4355	7	0	0	-1.82558	0	-0.992773	-1.11123	-1.15774	-0.768293	-1.06406	-0.803941	0.632751	0.947001	0.25276	1.08041	0.757225	1.60735	0.620537
3067	10376459	---	---	cdna:pseudogene chromosome:NCBIM37:11:58775314:58775724:1 gene:ENSMUSG00000080152 gene_biotype:pseudogene transcript_biotype:transcribed_unprocessed_pseudogene	-0.982992	0.372702	0.842564	0.299563	9.62542	9	0	0	-1.82556	0	-0.972767	-0.47746	-0.721382	-0.910119	-1.45092	-1.3653	0.56628	1.39508	0.821451	0.650951	0.610926	0.765594	1.08766
15282	10498185	NM_009186	Tra2b	Mus musculus transformer 2 beta homolog (Drosophila) (Tra2b), mRNA.	-0.982988	0.213037	0.842561	0.409497	10.2826	9	0	0	-1.82555	0	-1.19567	-0.855055	-0.936113	-0.780872	-1.29833	-0.831883	0.638917	0.672671	0.161042	0.865566	0.969957	1.14427	1.4455
7035	10415791	NM_026001	Rnaseh2b	Mus musculus ribonuclease H2, subunit B (Rnaseh2b), mRNA.	-0.982949	0.274993	0.842527	0.377669	10.052	10	0	0	-1.82548	0	-1.07837	-0.731239	-1.05644	-0.594511	-1.08013	-1.357	1.40775	1.17916	0.299481	0.614957	1.00946	0.738136	0.648745
23874	10579609	NR_028267	Fcho1	Mus musculus FCH domain only 1 (Fcho1), transcript variant 2, non-coding RNA.	-0.98293	0.447857	0.842511	0.196402	9.25061	6	0	0	-1.82544	0	-1.09682	-0.504026	-0.761444	-0.573869	-1.6366	-1.32481	1.0877	0.729121	1.04415	0.51772	0.795402	0.93017	0.793319
1240	10358124	NM_019645	Pkp1	Mus musculus plakophilin 1 (Pkp1), mRNA.	-0.982882	0.163506	0.84247	0.428504	10.4201	7	0	0	-1.82535	0	-1.17922	-0.74104	-1.0064	-0.838962	-1.09418	-1.03749	0.447482	0.119144	0.839963	1.19267	1.25262	1.20524	0.840173
12946	10474642	NM_001145898	BC052040	Mus musculus cDNA sequence BC052040 (BC052040), transcript variant 1, mRNA.	-0.982754	0.307493	0.842361	0.357164	9.90064	10	0	0	-1.82512	0	-1.3254	-1.04882	-1.21829	-1.00418	-0.841607	-0.458228	0.745925	0.96212	0.243706	1.23348	0.523364	1.06217	1.12576
4461	10391036	NM_008471	Krt19	Mus musculus keratin 19 (Krt19), mRNA.	-0.982726	0.205857	0.842337	0.413701	10.281	9	0	0	-1.82506	0	-1.08065	-1.03427	-0.56765	-1.08536	-1.10628	-1.02216	0.0869887	1.0931	1.22689	0.610092	0.808401	1.27618	0.794702
8911	10435329	NM_172824	Ccdc14	Mus musculus coiled-coil domain containing 14 (Ccdc14), mRNA.	-0.98263	0.223764	0.842254	0.406312	10.2127	9	0	0	-1.82488	0	-1.14684	-1.14417	-1.10631	-1.10673	-0.663284	-0.728441	1.06736	0.406264	0.274812	0.887377	0.890833	1.492	0.877128
10036	10446063	NM_025566	Tnfaip8l1	Mus musculus tumor necrosis factor, alpha-induced protein 8-like 1 (Tnfaip8l1), mRNA.	-0.982579	0.198803	0.842211	0.41721	10.2891	8	0	0	-1.82479	0	-1.07207	-0.802416	-0.821349	-0.796013	-1.19143	-1.2122	0.320916	0.419564	0.529507	0.891295	1.2239	1.19559	1.3147
19687	10542335	NM_181444	Gprc5a	Mus musculus G protein-coupled receptor, family C, group 5, member A (Gprc5a), mRNA.	-0.982484	0.369571	0.842129	0.305821	9.59994	9	0	0	-1.82461	0	-1.14978	-1.16453	-1.24844	-1.18236	-0.275862	-0.873926	0.833963	1.18082	0.635097	0.762607	1.19801	0.333492	0.950923
13094	10476362	NM_025676	Mcm8	Mus musculus minichromosome maintenance deficient 8 (S. cerevisiae) (Mcm8), mRNA.	-0.982423	0.199057	0.842076	0.417794	10.2734	8	0	0	-1.8245	0	-1.19016	-0.987192	-1.15299	-1.07626	-0.703206	-0.784731	0.486077	0.479554	0.515119	1.3402	0.559967	1.32938	1.18424
19247	10538214	NM_172727	D330028D13Rik	Mus musculus RIKEN cDNA D330028D13 gene (D330028D13Rik), transcript variant 1, mRNA.	-0.982277	0.24112	0.841951	0.399568	10.1194	10	0	0	-1.82423	0	-1.10339	-1.00806	-1.33987	-0.795922	-0.999503	-0.646918	1.16033	0.439903	0.153107	1.2211	1.09376	0.952929	0.872531
2279	10368508	NM_001109747	Cenpw	Mus musculus centromere protein W (Cenpw), mRNA.	-0.982272	0.112151	0.841948	0.444565	10.4746	6	0	0	-1.82422	0	-0.86822	-0.944459	-1.12551	-0.952264	-0.886944	-1.11623	0.549251	0.344246	0.298903	1.10308	0.939253	1.37729	1.28161
14838	10493850	NM_011468	Sprr2a1	Mus musculus small proline-rich protein 2A1 (Sprr2a1), mRNA.	-0.982219	0.300976	0.841902	0.36445	9.88213	10	0	0	-1.82412	0	-1.27301	-1.29675	-1.07646	-0.805058	-0.936324	-0.505705	0.623397	1.32584	1.16779	1.18266	0.517804	0.500324	0.575498
21310	10556491	NM_026143	Far1	Mus musculus fatty acyl CoA reductase 1 (Far1), transcript variant 1, mRNA.	-0.982	0.28224	0.841714	0.377796	9.93933	10	0	0	-1.82371	0	-1.30799	-1.14386	-0.979657	-1.1699	-0.688811	-0.601789	0.853731	0.419645	0.246938	1.30172	0.957957	1.11675	0.995267
19466	10540118	NM_026309	Lsm3	Mus musculus LSM3 homolog, U6 small nuclear RNA associated (S. cerevisiae) (Lsm3), mRNA.	-0.981783	0.0785345	0.841529	0.452507	10.4782	6	0	0	-1.82331	0	-1.02823	-0.992202	-0.877342	-0.904727	-0.999604	-1.0886	0.706145	0.979012	0.132957	0.998571	0.603476	0.849345	1.62119
10675	10452228	NM_010613	Khsrp	Mus musculus KH-type splicing regulatory protein (Khsrp), mRNA.	-0.981706	0.191857	0.841462	0.423686	10.2272	8	0	0	-1.82317	0	-1.15545	-1.11334	-1.03178	-1.1034	-0.69129	-0.79497	0.647469	0.545228	0.342089	0.78057	0.775723	1.58837	1.21079
15336	10498620	NM_025863	Trim59	Mus musculus tripartite motif-containing 59 (Trim59), mRNA.	-0.981581	0.130978	0.841355	0.443107	10.3689	7	0	0	-1.82294	0	-1.17333	-0.944939	-1.09876	-0.92174	-0.812957	-0.937762	0.733959	0.501473	0.368564	0.880765	0.574287	1.19618	1.63426
27448	10404649	---	---	---	-0.98148	0.302076	0.841269	0.367377	9.8149	10	0	0	-1.82275	0	-1.34485	-1.1867	-1.14463	-0.946932	-0.707869	-0.557899	0.905617	0.311628	0.44633	1.00884	0.786299	1.38623	1.04394
16432	10509053	NM_174851	Il28ra	Mus musculus interleukin 28 receptor alpha (Il28ra), mRNA.	-0.981289	0.302332	0.841105	0.368148	9.79782	10	0	0	-1.82239	0	-1.20768	-1.00321	-1.23303	-1.22746	-0.646229	-0.57013	1.1233	0.595347	0.180281	1.21101	0.799837	0.824342	1.15362
16757	10512411	ENSMUST00000030165	Fancg	cdna:known chromosome:NCBIM37:4:43015215:43023227:-1 gene:ENSMUSG00000028453 gene_biotype:protein_coding transcript_biotype:protein_coding	-0.981182	0.274736	0.841013	0.38626	9.8977	10	0	0	-1.82219	0	-1.13883	-0.753288	-1.40832	-0.848117	-1.06344	-0.675092	1.01366	0.765856	0.215667	1.08226	0.553856	1.41374	0.842059
23305	10573615	NM_019716	Orc6	Mus musculus origin recognition complex, subunit 6 (Orc6), transcript variant 1, mRNA.	-0.981122	0.136706	0.840962	0.443553	10.3121	7	0	0	-1.82208	0	-1.18355	-0.984514	-1.06825	-0.949969	-0.919593	-0.780855	0.875487	0.299192	0.204121	1.03117	0.865418	1.22992	1.38142
27433	10403428	---	---	---	-0.981107	0.313579	0.840949	0.361144	9.73641	10	0	0	-1.82206	0	-1.35263	-0.989924	-1.05528	-1.24619	-0.718486	-0.524144	0.782092	0.43376	0.311488	0.956007	1.33661	1.03507	1.03161
16883	10513622	ENSMUST00000030091	Pole3	cdna:known chromosome:NCBIM37:4:62183683:62186102:-1 gene:ENSMUSG00000028394 gene_biotype:protein_coding transcript_biotype:protein_coding	-0.981103	0.25029	0.840946	0.400221	9.98128	10	0	0	-1.82205	0	-1.27495	-0.898241	-1.06253	-0.701591	-0.714681	-1.23463	1.13151	0.580664	0.0970312	0.961931	0.770755	1.08226	1.26247
19774	10543114	NM_026632	Rpa3	Mus musculus replication protein A3 (Rpa3), mRNA.	-0.980978	0.157244	0.840839	0.438443	10.2513	7	0	0	-1.82182	0	-0.979792	-1.20268	-1.10662	-0.971345	-0.844088	-0.781339	0.761582	0.701467	0.239751	0.906652	0.495903	1.24999	1.53052
15280	10498168	ENSMUST00000029316	Exosc8	cdna:known chromosome:NCBIM37:3:54532600:54539315:-1 gene:ENSMUSG00000027752 gene_biotype:protein_coding transcript_biotype:protein_coding	-0.98092	0.153738	0.840788	0.43972	10.2542	7	0	0	-1.82171	0	-0.990973	-0.955018	-1.17282	-1.03827	-0.706024	-1.02241	0.788407	0.687414	0.314006	0.525218	0.734377	1.21932	1.61678
22394	10565689	NM_007602	Capn5	Mus musculus calpain 5 (Capn5), mRNA.	-0.98091	0.120681	0.84078	0.448273	10.3242	6	0	0	-1.82169	0	-1.03448	-1.1981	-0.925719	-0.959419	-0.869145	-0.898589	1.25816	1.01548	-0.0182492	1.10915	0.499469	1.10226	0.919186
21691	10560260	NM_019748	Sae1	Mus musculus SUMO1 activating enzyme subunit 1 (Sae1), mRNA.	-0.980874	0.136567	0.840749	0.444607	10.2886	7	0	0	-1.82162	0	-1.04132	-0.878234	-0.946868	-0.811387	-1.00625	-1.20119	0.667026	0.834259	0.0605981	1.10679	0.613915	1.28263	1.32002
162	10346224	NM_001142647	Tmem194b	Mus musculus transmembrane protein 194B (Tmem194b), transcript variant 1, mRNA.	-0.980815	0.352326	0.840699	0.331642	9.54716	10	0	0	-1.82151	0	-1.16786	-1.15091	-1.40041	-1.01843	-0.728037	-0.419232	0.284987	0.610653	0.952727	0.920765	0.996603	1.34162	0.777535
9893	10444911	NM_001010833	Mdc1	Mus musculus mediator of DNA damage checkpoint 1 (Mdc1), mRNA.	-0.980701	0.273828	0.840601	0.389054	9.85998	10	0	0	-1.8213	0	-1.38967	-0.999016	-1.03581	-1.10995	-0.690954	-0.658802	0.517832	0.909571	0.60302	0.98273	0.341158	1.50266	1.02723
8413	10429691	NM_134087	Fam83h	Mus musculus family with sequence similarity 83, member H (Fam83h), transcript variant 2, mRNA.	-0.980514	0.379048	0.840441	0.307889	9.40482	9	0	0	-1.82096	0	-1.23208	-1.32676	-1.22805	-1.09509	-0.493739	-0.50737	0.678535	0.463036	0.432888	1.10191	1.10383	0.991263	1.11162
19684	10542317	NM_009875	Cdkn1b	Mus musculus cyclin-dependent kinase inhibitor 1B (Cdkn1b), mRNA.	-0.980482	0.249867	0.840413	0.403257	9.9284	10	0	0	-1.8209	0	-0.986094	-1.32305	-1.15647	-0.589345	-0.945409	-0.882528	1.07215	0.591157	0.305021	0.973401	0.591738	0.807162	1.54226
23169	10572097	NM_028182	Sh2d4a	Mus musculus SH2 domain containing 4A (Sh2d4a), mRNA.	-0.980338	0.337997	0.84029	0.346362	9.57186	10	0	0	-1.82063	0	-1.54395	-0.820746	-1.15757	-0.860927	-0.944057	-0.554782	0.673485	0.415309	0.882319	0.738291	1.05421	1.48205	0.63637
12907	10474381	NM_139303	Kif18a	Mus musculus kinesin family member 18A (Kif18a), mRNA.	-0.980196	0.192408	0.840168	0.429925	10.0859	8	0	0	-1.82036	0	-0.949845	-1.01052	-1.15023	-1.21783	-0.690361	-0.86239	0.560222	0.367334	0.690133	0.991412	0.514443	1.18478	1.57286
22747	10568217	NM_023203	Dctpp1	Mus musculus dCTP pyrophosphatase 1 (Dctpp1), mRNA.	-0.979993	0.268067	0.839994	0.395654	9.8213	10	0	0	-1.81999	0	-0.657227	-0.887657	-0.749676	-1.03188	-1.36254	-1.19098	0.48439	1.31111	0.318504	1.11133	0.511238	1.19381	0.94957
19408	10539617	NM_145223	Alms1	Mus musculus Alstrom syndrome 1 (Alms1), mRNA.	-0.979959	0.110601	0.839965	0.454265	10.2511	6	0	0	-1.81992	0	-1.12254	-1.00626	-1.07373	-0.947512	-0.908448	-0.821265	0.791427	1.05204	0.164475	1.1828	0.28085	1.06405	1.34411
590	10351047	NM_027429	Cenpl	Mus musculus centromere protein L (Cenpl), transcript variant 2, mRNA.	-0.979579	0.210871	0.839639	0.425296	9.97666	9	0	0	-1.81922	0	-1.11282	-1.0131	-1.22321	-0.850542	-1.04851	-0.629294	0.733202	0.271335	0.706613	0.909442	0.482168	1.40491	1.3698
12538	10471608	NM_012018	Cep110	Mus musculus centrosomal protein 110 (Cep110), transcript variant 1, mRNA.	-0.979454	0.147447	0.839532	0.447515	10.1316	7	0	0	-1.81899	0	-1.1668	-1.03047	-1.11445	-0.919408	-0.829356	-0.816233	0.836661	0.557424	0.134112	0.677198	0.942022	1.2304	1.49891
3495	10381072	NM_011799	Cdc6	Mus musculus cell division cycle 6 (Cdc6), transcript variant 1, mRNA.	-0.979267	0.370501	0.839372	0.323533	9.35013	10	0	0	-1.81864	0	-0.864577	-0.652216	-0.854749	-0.630566	-1.50943	-1.36407	0.820893	0.955929	0.251375	1.06247	0.667699	1.27424	0.842991
19766	10543031	NM_015829	Slc25a13	Mus musculus solute carrier family 25 (mitochondrial carrier, adenine nucleotide translocator), member 13 (Slc25a13), nuclear gene encoding mitochondrial protein, transcript variant 1, mRNA.	-0.979266	0.278439	0.839371	0.393019	9.72273	10	0	0	-1.81864	0	-1.11803	-1.26581	-1.19685	-1.02056	-0.597379	-0.676956	1.11042	0.119864	0.626426	1.0652	1.26959	0.677461	1.00663
21837	10561388	ENSMUST00000081946	Timm50	cdna:known chromosome:NCBIM37:7:29090535:29097091:-1 gene:ENSMUSG00000003438 gene_biotype:protein_coding transcript_biotype:protein_coding	-0.979266	0.133175	0.839371	0.451987	10.1442	7	0	0	-1.81864	0	-0.741124	-1.06377	-0.988425	-1.07784	-0.91864	-1.08579	0.301843	0.888057	0.339104	0.643949	0.892877	1.44685	1.36291
23340	10574033	NM_172410	Nup93	Mus musculus nucleoporin 93 (Nup93), mRNA.	-0.979115	0.279402	0.839242	0.393147	9.70683	10	0	0	-1.81836	0	-1.14145	-1.0921	-0.932617	-1.21897	-0.443374	-1.04618	0.879228	0.251205	0.453249	0.69928	1.1322	1.12833	1.33121
16934	10514219	NR_028545	Scarna8	Mus musculus small Cajal body-specific RNA 8 (Scarna8), guide RNA.	-0.978612	0.123183	0.83881	0.456951	10.1033	7	0	0	-1.81742	0	-0.932273	-1.02923	-1.19237	-0.828984	-0.963638	-0.925178	0.858273	0.401944	0.140195	0.916933	0.847444	1.49067	1.21622
3873	10385083	NM_146017	Gabrp	Mus musculus gamma-aminobutyric acid (GABA) A receptor, pi (Gabrp), mRNA.	-0.978487	0.0280442	0.838703	0.470369	10.2003	6	0	0	-1.81719	0	-0.977142	-0.946133	-1.00144	-1.02036	-0.955209	-0.970639	0.92864	0.0560836	1.25672	0.88409	1.08606	1.31378	0.345539
22698	10567663	NM_001081238	Palb2	Mus musculus partner and localizer of BRCA2 (Palb2), mRNA.	-0.978395	0.162787	0.838624	0.447387	10.0008	7	0	0	-1.81702	0	-1.05433	-1.17418	-1.05081	-1.00013	-0.884208	-0.706711	1.02685	0.229935	0.258267	1.1985	0.748246	1.36721	1.04136
12246	10468489	ENSMUST00000069988	Xpnpep1	cdna:known chromosome:NCBIM37:19:53065673:53113123:-1 gene:ENSMUSG00000025027 gene_biotype:protein_coding transcript_biotype:protein_coding	-0.97835	0.188128	0.838586	0.439211	9.9334	8	0	0	-1.81694	0	-1.17328	-1.20335	-0.972857	-0.970248	-0.721859	-0.828504	0.963608	0.832418	0.100528	0.570843	0.742014	1.45757	1.20312
2558	10371603	AK132809	Gm6653	Mus musculus adult male testis cDNA, RIKEN full-length enriched library, clone:4930412E16 product:hypothetical protein, full insert sequence.	-0.978305	0.334541	0.838547	0.359585	9.4295	10	0	0	-1.81685	0	-0.779754	-0.72975	-0.900891	-0.732658	-1.1449	-1.58188	0.345955	0.952314	0.413778	1.00031	0.770641	1.36246	1.02437
17991	10524866	NM_001033311	Vsig10	Mus musculus V-set and immunoglobulin domain containing 10 (Vsig10), mRNA.	-0.978298	0.284397	0.838541	0.393938	9.62248	10	0	0	-1.81684	0	-1.33824	-1.23013	-1.09091	-0.8558	-0.713466	-0.641241	0.834449	1.10544	0.107906	1.22479	0.528672	1.08022	0.988319
9774	10443463	NM_007669	Cdkn1a	Mus musculus cyclin-dependent kinase inhibitor 1A (P21) (Cdkn1a), transcript variant 1, mRNA.	-0.978249	0.262008	0.838499	0.406893	9.69805	10	0	0	-1.81675	0	-1.147	-1.2979	-0.95809	-0.817952	-1.08796	-0.560582	0.850633	0.939381	0.545954	1.20793	1.33311	0.871783	0.120701
2719	10373467	ENSMUST00000082059	Erbb3	cdna:known chromosome:NCBIM37:10:128004579:128026708:-1 gene:ENSMUSG00000018166 gene_biotype:protein_coding transcript_biotype:protein_coding	-0.978047	0.290229	0.838326	0.391546	9.58112	10	0	0	-1.81637	0	-1.22468	-1.2646	-0.997606	-0.56328	-1.12848	-0.689637	1.19572	1.00336	0.187892	1.07978	0.375335	0.949589	1.0766
19849	10543879	NM_001013366	Wdr91	Mus musculus WD repeat domain 91 (Wdr91), mRNA.	-0.97796	0.30662	0.838252	0.381406	9.5129	10	0	0	-1.81621	0	-1.08152	-0.535668	-1.09665	-0.676618	-1.3457	-1.13161	1.05635	0.504055	0.161691	1.23339	1.14574	0.906761	0.859783
21392	10557434	NM_138310	Apobr	Mus musculus apolipoprotein B receptor (Apobr), mRNA.	-0.977893	0.237063	0.838194	0.420985	9.75139	9	0	0	-1.81609	0	-0.734226	-0.943854	-0.801517	-0.853847	-1.20843	-1.32548	0.793788	1.43269	1.20989	0.947954	0.824141	0.470734	0.188159
14449	10490053	NM_001033299	Zfp217	Mus musculus zinc finger protein 217 (Zfp217), transcript variant 1, mRNA.	-0.977854	0.285773	0.838161	0.395156	9.58217	10	0	0	-1.81601	0	-1.1809	-1.05975	-1.36939	-0.922706	-0.741469	-0.592916	1.08452	0.216028	0.606804	0.676773	1.44122	1.04778	0.793998
10379	10449527	NM_134115	Stk38	Mus musculus serine/threonine kinase 38 (Stk38), mRNA.	-0.977756	0.376732	0.838077	0.326016	9.21395	10	0	0	-1.81583	0	-1.33998	-1.25479	-1.35105	-0.756046	-0.59738	-0.567283	1.08452	0.188093	0.909386	0.798908	0.750544	1.19967	0.93541
6548	10411226	NM_007974	F2rl1	Mus musculus coagulation factor II (thrombin) receptor-like 1 (F2rl1), mRNA.	-0.977714	0.387804	0.838041	0.315252	9.16359	9	0	0	-1.81576	0	-1.19564	-1.29555	-1.39301	-0.954456	-0.509549	-0.518085	0.926642	0.386667	0.738375	1.14645	0.870363	0.530647	1.26715
6087	10407081	NM_178683	Depdc1b	Mus musculus DEP domain containing 1B (Depdc1b), mRNA.	-0.977664	0.176493	0.837997	0.446022	9.90363	8	0	0	-1.81566	0	-0.849524	-0.805225	-0.81452	-1.14095	-1.0531	-1.20266	0.807276	0.294315	0.675952	1.07148	0.440108	0.93331	1.64355
8839	10434559	NM_010143	Ephb3	Mus musculus Eph receptor B3 (Ephb3), mRNA.	-0.97763	0.377258	0.837969	0.326211	9.20278	10	0	0	-1.8156	0	-1.4888	-1.3468	-1.0001	-0.782211	-0.511819	-0.736051	0.628965	0.49077	0.744245	0.972168	0.743425	1.49828	0.787925
4167	10388234	NM_010353	Gsg2	Mus musculus germ cell-specific gene 2 (Gsg2), mRNA.	-0.977611	0.137995	0.837952	0.457402	9.98499	7	0	0	-1.81556	0	-1.16589	-1.03897	-0.82279	-1.01505	-0.806885	-1.01608	0.319785	0.308796	0.651959	0.911754	0.875683	1.26443	1.53326
757	10352735	ENSMUST00000045450	Ints7	cdna:known chromosome:NCBIM37:1:193399642:193446551:1 gene:ENSMUSG00000037461 gene_biotype:protein_coding transcript_biotype:protein_coding	-0.977504	0.0711809	0.837861	0.470373	10.0773	6	0	0	-1.81536	0	-1.04411	-1.07807	-0.94085	-0.966657	-0.884791	-0.950548	0.10773	1.21872	0.52896	0.829441	0.647742	1.54076	0.991671
11753	10463173	NM_023740	Zdhhc16	Mus musculus zinc finger, DHHC domain containing 16 (Zdhhc16), mRNA.	-0.977303	0.129066	0.837688	0.460785	9.97485	7	0	0	-1.81499	0	-1.10287	-1.03053	-1.11686	-0.882261	-0.790667	-0.940622	1.0922	0.255123	0.325275	0.677329	0.769868	1.4263	1.31773
7999	10425801	NM_007546	Bik	Mus musculus BCL2-interacting killer (Bik), mRNA.	-0.977124	0.348275	0.837535	0.354645	9.28661	10	0	0	-1.81466	0	-0.784761	-1.31711	-1.50736	-0.672693	-0.862299	-0.718525	1.06448	0.431858	0.42744	1.2588	1.24104	0.685914	0.753208
20749	10551600	NM_177301	Hnrnpl	Mus musculus heterogeneous nuclear ribonucleoprotein L (Hnrnpl), mRNA.	-0.977118	0.316208	0.83753	0.378884	9.41203	10	0	0	-1.81465	0	-1.31547	-1.0871	-1.16096	-0.849535	-0.411787	-1.03786	0.722411	0.799228	0.0806708	0.841767	1.13917	1.14704	1.13242
21811	10561128	NM_028775	Cyp2s1	Mus musculus cytochrome P450, family 2, subfamily s, polypeptide 1 (Cyp2s1), mRNA.	-0.977033	0.259314	0.837457	0.4137	9.60909	10	0	0	-1.81449	0	-0.975851	-1.32645	-1.18405	-0.830037	-0.954997	-0.590804	0.826845	0.0982005	0.803695	1.51763	0.788104	0.879342	0.948379
20368	10548573	NM_172891	Styk1	Mus musculus serine/threonine/tyrosine kinase 1 (Styk1), mRNA.	-0.976795	0.316933	0.837253	0.379922	9.38509	10	0	0	-1.81405	0	-1.19851	-1.14083	-1.29286	-1.02033	-0.756783	-0.451465	0.882226	1.19764	0.0852778	1.14246	0.945571	0.628363	0.97924
18465	10530100	NM_178407	Arap2	Mus musculus ArfGAP with RhoGAP domain, ankyrin repeat and PH domain 2 (Arap2), mRNA.	-0.976746	0.319689	0.837211	0.378229	9.37094	11	0	0	-1.81396	0	-1.18303	-1.01502	-1.24584	-1.25351	-0.63443	-0.528643	0.898956	0.470584	0.178967	1.22391	0.95907	1.1623	0.96669
6290	10408687	NM_010439	Hmgb1	Mus musculus high mobility group box 1 (Hmgb1), mRNA.	-0.976726	0.348551	0.837194	0.356451	9.25675	10	0	0	-1.81392	0	-0.804015	-0.969724	-0.613068	-0.71984	-1.20493	-1.54878	1.3249	0.852812	0.152779	0.979154	0.706787	0.968283	0.875644
23271	10573217	NM_197982	Ddx39	Mus musculus DEAD (Asp-Glu-Ala-Asp) box polypeptide 39 (Ddx39), mRNA.	-0.976668	0.14023	0.837144	0.460566	9.89804	7	0	0	-1.81381	0	-1.1965	-0.90276	-1.07228	-0.841774	-0.847493	-0.999197	0.19737	0.555113	0.473117	0.780915	1.25365	1.14761	1.45223
26402	10603469	NM_001166409	Rbm3	Mus musculus RNA binding motif protein 3 (Rbm3), transcript variant 2, mRNA.	-0.976598	0.295333	0.837084	0.395064	9.45018	10	0	0	-1.81368	0	-0.723216	-0.728855	-0.742142	-1.14602	-1.44214	-1.07722	1.46504	0.67027	0.560424	0.576882	1.31312	0.458989	0.814869
892	10354085	NM_019570	Rev1	Mus musculus REV1 homolog (S. cerevisiae) (Rev1), mRNA.	-0.976491	0.225169	0.836993	0.432317	9.67279	9	0	0	-1.81348	0	-1.16164	-1.08681	-1.05623	-1.10222	-0.898387	-0.553659	0.795742	0.903962	0.133111	1.10567	1.21601	1.30136	0.403091
23834	10579125	NM_145596	Gatad2a	Mus musculus GATA zinc finger domain containing 2A (Gatad2a), transcript variant 1, mRNA.	-0.976259	0.240534	0.836794	0.426352	9.60772	9	0	0	-1.81305	0	-1.30261	-1.11241	-0.727782	-1.13832	-0.840755	-0.735686	0.856364	0.693164	0.170652	0.806438	1.61422	0.957479	0.759237
2973	10375704	NM_026543	3010026O09Rik	Mus musculus RIKEN cDNA 3010026O09 gene (3010026O09Rik), mRNA.	-0.976043	0.117416	0.836609	0.468277	9.8853	6	0	0	-1.81265	0	-0.958282	-1.0422	-1.14334	-1.01811	-0.872282	-0.822048	0.786027	1.21913	0.396086	1.26311	0.329601	1.43905	0.423255
25250	10593035	NM_145403	Tmprss4	Mus musculus transmembrane protease, serine 4 (Tmprss4), mRNA.	-0.975844	0.206315	0.836438	0.442746	9.67355	8	0	0	-1.81228	0	-0.958757	-1.15	-0.697259	-1.19258	-0.765308	-1.09116	0.318855	0.780952	0.860082	1.18119	1.41473	0.212852	1.0864
4361	10390153	NM_001195003	Myst2	Mus musculus MYST histone acetyltransferase 2 (Myst2), transcript variant 1, mRNA.	-0.975477	0.102582	0.836123	0.473348	9.85933	6	0	0	-1.8116	0	-1.04649	-0.92553	-1.06349	-0.927961	-0.815894	-1.07349	1.64874	0.514928	0.233769	0.736727	1.0752	1.09611	0.547385
4214	10388591	NM_007754	Cpd	Mus musculus carboxypeptidase D (Cpd), mRNA.	-0.975174	0.19062	0.835863	0.45127	9.65999	8	0	0	-1.81104	0	-1.05318	-1.20705	-1.10073	-0.991112	-0.793822	-0.705139	1.07036	0.852883	0.0192304	1.01628	0.472983	1.37703	1.04228
10711	10452633	NM_009372	Tgif1	Mus musculus TGFB-induced factor homeobox 1 (Tgif1), transcript variant 2, mRNA.	-0.975107	0.299097	0.835806	0.399519	9.32519	10	0	0	-1.81091	0	-1.41436	-0.887665	-1.27146	-0.870093	-0.690217	-0.716854	1.25964	0.702863	0.48877	0.853805	1.14721	0.196526	1.20183
12744	10473414	NM_182990	Ssrp1	Mus musculus structure specific recognition protein 1 (Ssrp1), transcript variant 1, mRNA.	-0.974932	0.217581	0.835656	0.441983	9.56963	9	0	0	-1.81059	0	-1.15322	-1.01509	-1.02578	-0.739767	-0.688762	-1.22697	0.783129	0.377805	0.360874	0.589491	0.926152	1.49196	1.32018
2058	10366457	NM_011217	Ptprr	Mus musculus protein tyrosine phosphatase, receptor type, R (Ptprr), transcript variant 1, mRNA.	-0.974913	0.24658	0.835639	0.429187	9.4836	9	0	0	-1.81055	0	-0.838632	-1.20629	-0.575066	-1.2193	-1.07746	-0.932723	1.43146	0.936098	0.326388	0.808163	1.05287	0.221895	1.0726
3652	10382797	NM_176902	Fam100b	Mus musculus family with sequence similarity 100, member B (Fam100b), mRNA.	-0.974495	0.337879	0.835282	0.375828	9.14015	10	0	0	-1.80978	0	-1.12086	-1.23829	-1.37406	-0.922444	-0.718959	-0.472358	0.738591	0.716447	0.423728	1.30719	1.29594	0.388372	0.976702
3319	10379346	NM_199196	Suz12	Mus musculus suppressor of zeste 12 homolog (Drosophila) (Suz12), transcript variant 1, mRNA.	-0.97446	0.252738	0.835251	0.42811	9.4301	9	0	0	-1.80971	0	-1.40021	-0.941872	-0.858999	-1.12741	-0.820763	-0.6975	0.983951	0.181961	0.404846	0.793292	0.894765	1.43427	1.15367
5465	10401343	NM_001174107	Map3k9	Mus musculus mitogen-activated protein kinase kinase kinase 9 (Map3k9), transcript variant 1, mRNA.	-0.974366	0.255566	0.835171	0.427106	9.41426	9	0	0	-1.80954	0	-1.35687	-1.02019	-1.03508	-1.04278	-0.610721	-0.780564	1.32513	0.593757	0.201496	1.11971	1.1732	1.00906	0.423858
25166	10592342	NM_025289	Tbrg1	Mus musculus transforming growth factor beta regulated gene 1 (Tbrg1), mRNA.	-0.97428	0.240246	0.835097	0.434811	9.4541	9	0	0	-1.80938	0	-1.0205	-0.865086	-0.979065	-0.665342	-0.921546	-1.39414	0.870915	1.31938	0.138029	0.365708	1.22938	0.910663	1.01161
28497	10568731	---	---	---	-0.974262	0.395892	0.835081	0.326524	8.8975	9	0	0	-1.80934	0	-1.03743	-0.538035	-1.53792	-1.29849	-0.847243	-0.58645	0.781586	0.520901	0.699043	0.59146	1.2081	1.37655	0.667925
28368	10548699	---	---	---	-0.974233	0.356145	0.835057	0.36281	9.05275	10	0	0	-1.80929	0	-0.955007	-0.516783	-0.798895	-0.782866	-1.4238	-1.36804	0.236758	1.31698	0.779483	1.05975	0.6073	0.724051	1.12108
4867	10395612	NM_001015099	G2e3	Mus musculus G2/M-phase specific E3 ubiquitin ligase (G2e3), transcript variant 1, mRNA.	-0.974202	0.360774	0.83503	0.359134	9.0328	10	0	0	-1.80923	0	-1.17371	-1.1855	-1.46084	-0.876421	-0.585229	-0.563515	0.518559	0.561178	0.452724	1.15753	0.695022	1.32173	1.13847
15881	10503711	NM_011997	Casp8ap2	Mus musculus caspase 8 associated protein 2 (Casp8ap2), transcript variant 1, mRNA.	-0.97416	0.189857	0.834994	0.455584	9.58062	8	0	0	-1.80915	0	-1.22865	-1.03549	-1.09632	-0.964204	-0.709779	-0.810513	1.08724	0.0136556	0.404136	0.8749	1.06539	1.21726	1.18238
10295	10448495	BC072612	1600002H07Rik	Mus musculus RIKEN cDNA 1600002H07 gene, mRNA (cDNA clone MGC:99862 IMAGE:6414405), complete cds.	-0.97372	0.248473	0.834617	0.433287	9.38723	9	0	0	-1.80834	0	-0.614561	-0.941493	-1.31192	-0.806612	-1.00611	-1.16163	0.742159	0.593263	0.124471	0.955232	0.790928	1.50692	1.12934
21263	10556113	NM_016809	Rbm3	Mus musculus RNA binding motif protein 3 (Rbm3), transcript variant 1, mRNA.	-0.973691	0.279652	0.834592	0.417278	9.28747	10	0	0	-1.80828	0	-0.696113	-0.704512	-0.801552	-1.13285	-1.37584	-1.13128	1.55046	0.757609	0.589718	0.532412	1.27419	0.4264	0.711354
27003	10608696	NM_025645	Snrnp40	Mus musculus small nuclear ribonucleoprotein 40 (U5) (Snrnp40), mRNA.	-0.973485	0.215427	0.834416	0.448734	9.46288	8	0	0	-1.8079	0	-1.02927	-1.01307	-1.07984	-1.11466	-0.539991	-1.06408	0.51953	0.496498	0.283721	0.981308	0.878615	1.06174	1.6195
20956	10553336	NM_028031	Zdhhc13	Mus musculus zinc finger, DHHC domain containing 13 (Zdhhc13), mRNA.	-0.97321	0.337756	0.83418	0.382053	9.05222	10	0	0	-1.80739	0	-1.22254	-1.34019	-1.1358	-0.929732	-0.798893	-0.412102	0.906252	0.350118	0.296831	1.21528	1.21292	1.07193	0.785933
15353	10498827	NM_001162999	Fnip2	Mus musculus folliculin interacting protein 2 (Fnip2), mRNA.	-0.973139	0.110925	0.834119	0.480661	9.65252	6	0	0	-1.80726	0	-1.06827	-0.917983	-1.13956	-0.839053	-0.960865	-0.9131	1.21609	0.144255	0.481188	0.811574	1.49313	0.526351	1.16623
13742	10483633	NM_001018042	Sp3	Mus musculus trans-acting transcription factor 3 (Sp3), transcript variant 1, mRNA.	-0.973122	0.254453	0.834105	0.432888	9.32485	9	0	0	-1.80723	0	-1.24749	-1.15875	-1.11843	-0.985657	-0.694715	-0.633691	0.946008	0.273021	0.183045	0.948766	1.03535	1.30341	1.14913
24934	10590149	NM_001033209	Xylb	Mus musculus xylulokinase homolog (H. influenzae) (Xylb), transcript variant 1, mRNA.	-0.973106	0.266129	0.834091	0.427067	9.28793	10	0	0	-1.8072	0	-1.26957	-0.821401	-0.543789	-1.09422	-0.930572	-1.17909	0.137612	0.84658	0.648823	1.17222	0.916102	0.638621	1.47868
26003	10600017	ENSMUST00000114582	Hmgb3	cdna:known chromosome:NCBIM37:X:68809103:68813851:1 gene:ENSMUSG00000015217 gene_biotype:protein_coding transcript_biotype:protein_coding	-0.973036	0.315502	0.834031	0.398383	9.11975	10	0	0	-1.80707	0	-1.10357	-1.09291	-1.12637	-1.13457	-0.331981	-1.04882	1.26763	0.261439	0.783256	0.993208	1.11647	0.322759	1.09345
2593	10372091	NM_027532	3200002M19Rik	Mus musculus RIKEN cDNA 3200002M19 gene (3200002M19Rik), mRNA.	-0.972953	0.250177	0.83396	0.435661	9.32517	9	0	0	-1.80691	0	-1.06919	-0.666551	-1.19333	-0.808591	-0.802708	-1.29735	0.425465	0.761331	0.109603	1.2113	0.896763	1.17944	1.25383
28432	10559818	---	---	---	-0.972882	0.185195	0.833899	0.462206	9.49159	8	0	0	-1.80678	0	-1.07956	-0.780656	-1.20017	-1.04983	-0.71921	-1.00786	0.482499	0.442218	0.536504	0.824256	1.33525	1.61545	0.601111
6243	10408321	ENSMUST00000006898	Gmnn	cdna:known chromosome:NCBIM37:13:24843714:24853730:-1 gene:ENSMUSG00000006715 gene_biotype:protein_coding transcript_biotype:protein_coding	-0.972837	0.163904	0.83386	0.469033	9.53475	7	0	0	-1.8067	0	-1.25319	-0.888657	-0.953169	-0.962953	-1.02043	-0.758623	0.861043	0.291289	0.206615	0.912627	0.793802	1.47025	1.3014
5237	10399254	NM_134046	Cenpo	Mus musculus centromere protein O (Cenpo), mRNA.	-0.972771	0.0890597	0.833804	0.485803	9.65146	6	0	0	-1.80658	0	-1.06894	-0.962079	-0.851639	-0.900358	-0.979167	-1.07445	0.394285	0.678065	0.251303	0.951381	0.665128	1.27221	1.62426
18086	10525983	NM_009391	Ran	Mus musculus RAN, member RAS oncogene family (Ran), mRNA.	-0.972736	0.255014	0.833773	0.434224	9.29482	9	0	0	-1.80651	0	-1.15692	-1.11499	-1.17024	-1.06348	-0.533421	-0.797354	0.493029	0.285352	0.38066	1.07922	1.11483	1.1054	1.37792
15611	10501121	NM_153563	Fam40a	Mus musculus family with sequence similarity 40, member A (Fam40a), mRNA.	-0.972662	0.166517	0.833711	0.468937	9.51567	7	0	0	-1.80637	0	-0.987519	-0.866218	-1.04548	-1.10805	-0.694517	-1.13419	0.711379	0.613342	0.278914	0.520862	0.897022	1.10034	1.71412
7835	10424221	ENSMUST00000110178	Wdr67	cdna:known chromosome:NCBIM37:15:57743754:57801623:1 gene:ENSMUSG00000022364 gene_biotype:protein_coding transcript_biotype:protein_coding	-0.972656	0.187851	0.833705	0.462196	9.468	8	0	0	-1.80636	0	-0.939684	-0.966327	-1.27077	-1.08005	-0.852207	-0.726896	0.41133	0.719959	0.681747	1.18171	0.169716	1.36083	1.31064
24252	10583264	ENSMUST00000034405	Mre11a	cdna:known chromosome:NCBIM37:9:14589098:14639090:1 gene:ENSMUSG00000031928 gene_biotype:protein_coding transcript_biotype:protein_coding	-0.972587	0.200034	0.833646	0.458189	9.4336	8	0	0	-1.80623	0	-1.17211	-1.03686	-1.1405	-0.997302	-0.851986	-0.636764	0.863777	0.28769	0.17411	0.871123	1.08222	1.46137	1.09523
8217	10427895	NM_027395	Basp1	Mus musculus brain abundant, membrane attached signal protein 1 (Basp1), mRNA.	-0.972332	0.197016	0.833428	0.460277	9.4216	8	0	0	-1.80576	0	-1.30502	-0.846987	-1.05687	-0.911194	-0.979802	-0.734124	0.519634	1.40727	0.383172	1.19564	0.434841	0.543668	1.34977
19703	10542460	NM_172733	Dera	Mus musculus 2-deoxyribose-5-phosphate aldolase homolog (C. elegans) (Dera), mRNA.	-0.972189	0.180151	0.833305	0.466556	9.44969	7	0	0	-1.80549	0	-0.989599	-1.03918	-1.2049	-1.07433	-0.712517	-0.812611	0.383858	1.06703	0.125117	1.03025	0.651067	1.11104	1.46477
21324	10556640	NM_182995	6330503K22Rik	Mus musculus RIKEN cDNA 6330503K22 gene (6330503K22Rik), mRNA.	-0.972046	0.265712	0.833182	0.431741	9.21276	10	0	0	-1.80523	0	-1.13261	-1.10516	-1.17438	-1.15712	-0.66593	-0.597062	1.13646	0.430062	0.158319	1.44339	0.947072	0.753891	0.963086
10337	10449111	NM_001163766	Wdr90	Mus musculus WD repeat domain 90 (Wdr90), mRNA.	-0.971986	0.252742	0.83313	0.43843	9.24709	9	0	0	-1.80512	0	-0.748871	-1.2548	-0.897398	-0.664355	-0.99646	-1.27003	0.573291	0.670848	0.220942	1.18843	0.622967	1.52162	1.03381
17278	10517243	NM_146156	Pdik1l	Mus musculus PDLIM1 interacting kinase 1 like (Pdik1l), transcript variant 1, mRNA.	-0.971885	0.216899	0.833045	0.454544	9.33849	8	0	0	-1.80493	0	-1.14096	-1.18332	-1.05028	-1.00285	-0.858952	-0.594954	0.482071	0.628631	0.16218	0.98105	0.831328	1.27412	1.47193
15500	10500103	NM_029885	Gabpb2	Mus musculus GA repeat binding protein, beta 2 (Gabpb2), transcript variant 1, mRNA.	-0.971811	0.103339	0.832981	0.487016	9.55687	6	0	0	-1.80479	0	-1.16816	-0.928267	-0.910496	-0.990986	-0.879779	-0.953174	0.587606	0.460622	0.336618	0.625782	1.00592	1.05668	1.75764
4122	10387723	NM_027419	2810408A11Rik	Mus musculus RIKEN cDNA 2810408A11 gene (2810408A11Rik), mRNA.	-0.971747	0.235701	0.832926	0.447235	9.27815	9	0	0	-1.80467	0	-1.03478	-0.976416	-0.694187	-0.771478	-1.36725	-0.986375	1.47019	0.625939	0.28168	0.748665	0.450634	1.37312	0.880255
2438	10370127	NM_008787	Pcnt	Mus musculus pericentrin (kendrin) (Pcnt), transcript variant 1, mRNA.	-0.971254	0.303494	0.832504	0.413926	9.03826	10	0	0	-1.80376	0	-1.35892	-1.05647	-1.20671	-0.966493	-0.622334	-0.616591	0.841868	0.648237	0.150489	1.05842	0.861519	1.51804	0.748955
249	10347297	NM_029711	Arpc2	Mus musculus actin related protein 2/3 complex, subunit 2 (Arpc2), mRNA.	-0.971213	0.320944	0.832468	0.402994	8.97719	10	0	0	-1.80368	0	-1.47942	-0.941623	-1.228	-0.796976	-0.658092	-0.723164	1.08087	0.66243	0.247337	1.26611	1.10194	1.09587	0.372705
20984	10553829	NM_176902	Fam100b	Mus musculus family with sequence similarity 100, member B (Fam100b), mRNA.	-0.97118	0.257622	0.83244	0.439377	9.17539	9	0	0	-1.80362	0	-1.0816	-1.03694	-1.28225	-1.04782	-0.853111	-0.525365	0.548752	0.816327	0.360504	1.41236	1.32632	0.343023	1.0198
20985	10553831	NM_176902	Fam100b	Mus musculus family with sequence similarity 100, member B (Fam100b), mRNA.	-0.97118	0.257622	0.83244	0.439377	9.17539	9	0	0	-1.80362	0	-1.0816	-1.03694	-1.28225	-1.04782	-0.853111	-0.525365	0.548752	0.816327	0.360504	1.41236	1.32632	0.343023	1.0198
6308	10408861	NM_175417	9530008L14Rik	Mus musculus RIKEN cDNA 9530008L14 gene (9530008L14Rik), transcript variant 1, mRNA.	-0.971143	0.169447	0.832408	0.473885	9.39319	7	0	0	-1.80355	0	-0.928779	-1.12617	-1.16973	-1.0232	-0.720248	-0.858725	0.12452	0.814402	0.487342	1.48612	0.577864	1.23583	1.10079
1222	10357917	NM_020588	Tmem183a	Mus musculus transmembrane protein 183A (Tmem183a), transcript variant 1, mRNA.	-0.971045	0.242619	0.832324	0.446983	9.20846	9	0	0	-1.80337	0	-1.17382	-1.23114	-1.08278	-0.967546	-0.614866	-0.756119	0.640915	1.10244	0.015146	1.04611	0.586817	1.12045	1.31439
11239	10458285	NM_027733	Spata24	Mus musculus spermatogenesis associated 24 (Spata24), transcript variant 1, mRNA.	-0.971007	0.167933	0.832292	0.474851	9.38606	7	0	0	-1.8033	0	-1.12386	-0.920586	-1.16766	-0.966426	-0.695224	-0.952286	0.784514	0.907141	0.0219514	1.39331	0.662324	1.39434	0.662468
30164	10343704	---	---	---	-0.970962	0.266638	0.832253	0.435773	9.13356	10	0	0	-1.80322	0	-1.35472	-0.863828	-0.860595	-0.954164	-0.602042	-1.19042	0.519814	0.910502	0.328725	0.879051	0.71298	1.70505	0.769654
11931	10465246	ENSMUST00000025728	Frmd8	cdna:known chromosome:NCBIM37:19:5849702:5875274:-1 gene:ENSMUSG00000024816 gene_biotype:protein_coding transcript_biotype:protein_coding	-0.970908	0.310344	0.832207	0.411194	8.99237	10	0	0	-1.80311	0	-1.25021	-0.879369	-1.01309	-0.696418	-1.39134	-0.59502	0.999692	0.448091	0.18842	1.39686	1.13761	0.90572	0.749049
12072	10466410	NM_177420	Psat1	Mus musculus phosphoserine aminotransferase 1 (Psat1), transcript variant 1, mRNA.	-0.970865	0.364126	0.83217	0.372835	8.80253	10	0	0	-1.80304	0	-0.762494	-1.07705	-1.37808	-1.19726	-0.351628	-1.05867	0.612509	0.764382	0.35353	0.824903	0.834331	0.860932	1.5746
30930	10338828	---	---	---	-0.970743	0.363781	0.832066	0.373703	8.79611	10	0	0	-1.80281	0	-0.890693	-0.890401	-1.63294	-0.854488	-1.02544	-0.530501	0.665237	0.259665	0.916926	1.06851	1.28987	1.13536	0.488891
14541	10490903	NM_024495	Car13	Mus musculus carbonic anhydrase 13 (Car13), mRNA.	-0.970677	0.335494	0.832009	0.395445	8.89213	10	0	0	-1.80269	0	-1.25063	-1.3088	-1.18128	-0.814889	-0.827957	-0.440503	0.505679	0.417803	0.786457	1.3175	1.25875	0.428087	1.10978
17243	10516926	NM_026039	Med18	Mus musculus mediator of RNA polymerase II transcription, subunit 18 homolog (yeast) (Med18), mRNA.	-0.970369	0.178671	0.831745	0.474004	9.31631	7	0	0	-1.80211	0	-1.16191	-0.844624	-0.933988	-1.17854	-0.982415	-0.720742	0.501016	0.498454	0.124464	1.30285	0.889173	1.09983	1.40643
6356	10409322	NM_028597	Thoc3	Mus musculus THO complex 3 (Thoc3), mRNA.	-0.970352	0.370528	0.83173	0.37005	8.74713	10	0	0	-1.80208	0	-0.850858	-0.914693	-1.56543	-1.02404	-0.417375	-1.04972	0.440248	0.919547	0.310249	0.76364	0.855545	1.31916	1.21372
910	10354275	ENSMUST00000147571	1700029F09Rik	cdna:known chromosome:NCBIM37:1:44143655:44159207:-1 gene:ENSMUSG00000026049 gene_biotype:protein_coding transcript_biotype:protein_coding	-0.970326	0.262925	0.831708	0.440264	9.10025	9	0	0	-1.80203	0	-1.25479	-0.888105	-1.20465	-1.12713	-0.708534	-0.638752	0.97343	0.332434	0.23099	0.872837	0.728792	1.3526	1.33087
25015	10591035	NM_176976	5830418K08Rik	Mus musculus RIKEN cDNA 5830418K08 gene (5830418K08Rik), mRNA.	-0.970275	0.28618	0.831665	0.428221	9.0271	10	0	0	-1.80194	0	-1.19416	-1.19382	-1.10681	-1.11861	-0.586405	-0.621854	0.516753	0.358049	0.416578	0.969024	0.824175	1.43589	1.30118
9852	10444524	NM_145830	Ehmt2	Mus musculus euchromatic histone lysine N-methyltransferase 2 (Ehmt2), transcript variant long, mRNA.	-0.970203	0.464766	0.831603	0.268098	8.37647	7	0	0	-1.80181	0	-0.816455	-0.760286	-0.703612	-0.451754	-1.62429	-1.46482	0.460889	1.20891	0.762761	0.588226	0.790947	1.11852	0.890966
18909	10534842	NM_010312	Gnb2	Mus musculus guanine nucleotide binding protein (G protein), beta 2 (Gnb2), mRNA.	-0.969992	0.34715	0.831422	0.390147	8.80779	10	0	0	-1.80141	0	-1.17336	-1.11756	-1.03092	-1.35727	-0.388184	-0.752659	1.29869	0.378215	1.12504	0.338919	1.186	0.644939	0.848148
7575	10421029	NM_175384	Cdca2	Mus musculus cell division cycle associated 2 (Cdca2), transcript variant 2, mRNA.	-0.969833	0.250923	0.831286	0.448047	9.10031	9	0	0	-1.80112	0	-1.1773	-1.23234	-1.10631	-0.840739	-0.89492	-0.567394	0.208868	1.02324	0.580179	1.04675	0.357518	1.25322	1.34923
2543	10371387	NM_175451	Ckap4	Mus musculus cytoskeleton-associated protein 4 (Ckap4), mRNA.	-0.969591	0.282134	0.831078	0.433305	8.99341	10	0	0	-1.80067	0	-1.09147	-1.02404	-1.11599	-1.32154	-0.571928	-0.692573	0.47692	0.860538	0.793547	0.825169	0.914454	1.66313	0.283791
11703	10462623	NM_008331	Ifit1	Mus musculus interferon-induced protein with tetratricopeptide repeats 1 (Ifit1), mRNA.	-0.969537	0.230204	0.831031	0.458391	9.13514	9	0	0	-1.80057	0	-0.923161	-0.554405	-1.05417	-0.940291	-1.17293	-1.17226	0.788896	0.795506	1.53952	0.484165	1.20004	0.882756	0.126341
888	10354054	NM_026913	Mitd1	Mus musculus MIT, microtubule interacting and transport, domain containing 1 (Mitd1), mRNA.	-0.969513	0.299344	0.831012	0.423903	8.9353	10	0	0	-1.80053	0	-1.22177	-1.10428	-1.26917	-1.00018	-0.515435	-0.706239	0.205383	0.288393	1.10269	0.792587	1.02944	1.25585	1.14274
29520	10340553	---	---	---	-0.969478	0.366741	0.830981	0.377375	8.70681	10	0	0	-1.80046	0	-1.31114	-1.36097	-1.10333	-0.805099	-0.85344	-0.382885	0.875456	0.649911	0.406062	1.52486	1.09277	0.709657	0.558156
22635	10567134	NM_172743	Plekha7	Mus musculus pleckstrin homology domain containing, family A member 7 (Plekha7), mRNA.	-0.969472	0.42294	0.830976	0.324734	8.49896	9	0	0	-1.80045	0	-1.13651	-1.43752	-1.31928	-0.992104	-0.37356	-0.557852	1.00513	0.606262	0.235152	1.05953	0.943401	1.19028	0.777079
13797	10484425	NM_001033166	2700094K13Rik	Mus musculus RIKEN cDNA 2700094K13 gene (2700094K13Rik), transcript variant 1, mRNA.	-0.969406	0.111056	0.830919	0.494447	9.36184	6	0	0	-1.80032	0	-0.876806	-0.85659	-1.0819	-0.943092	-0.929248	-1.1288	0.489038	0.618659	0.147442	1.05641	0.766556	1.68806	1.05027
11385	10459755	NM_025581	Ska1	Mus musculus spindle and kinetochore associated complex subunit 1 (Ska1), transcript variant 1, mRNA.	-0.969203	0.100107	0.830745	0.497126	9.36062	6	0	0	-1.79995	0	-0.838684	-1.00423	-0.93196	-0.917676	-1.13491	-0.987758	1.09029	0.372498	0.189636	0.907342	0.470318	1.27558	1.50955
3941	10385709	NM_145974	N4bp3	Mus musculus NEDD4 binding protein 3 (N4bp3), mRNA.	-0.969034	0.207569	0.8306	0.469245	9.15555	8	0	0	-1.79963	0	-0.793303	-1.07921	-0.985189	-0.74874	-0.895018	-1.31274	1.12273	0.360147	0.0579804	1.25739	1.05777	1.24336	0.714819
15423	10499536	NM_010107	Efna1	Mus musculus ephrin A1 (Efna1), transcript variant 1, mRNA.	-0.96901	0.160543	0.83058	0.48446	9.25309	7	0	0	-1.79959	0	-0.909223	-1.16511	-0.864189	-0.740319	-1.02228	-1.11294	1.36982	0.878094	0.174549	1.20407	0.313568	0.579656	1.29429
25941	10599554	NM_173376	Rbmx2	Mus musculus RNA binding motif protein, X-linked 2 (Rbmx2), mRNA.	-0.968994	0.187056	0.830566	0.476526	9.19877	8	0	0	-1.79956	0	-1.08595	-1.11456	-0.821574	-0.722417	-0.878356	-1.19111	0.887903	0.257615	0.180559	0.779764	1.03043	1.18205	1.49564
9182	10437970	BC089026	2310008H04Rik	Mus musculus RIKEN cDNA 2310008H04 gene, mRNA (cDNA clone MGC:115787 IMAGE:30615298), complete cds.	-0.968864	0.335282	0.830455	0.403763	8.77718	10	0	0	-1.79932	0	-1.40196	-1.12585	-1.03651	-1.03927	-0.410856	-0.798735	0.630374	0.373198	0.518396	1.0778	1.23828	1.40874	0.566391
3065	10376446	ENSMUST00000047697	Trim17	cdna:known chromosome:NCBIM37:11:58768187:58786600:1 gene:ENSMUSG00000036964 gene_biotype:protein_coding transcript_biotype:protein_coding	-0.968709	0.31508	0.830322	0.41777	8.83332	10	0	0	-1.79903	0	-1.40888	-1.14596	-0.782139	-0.508174	-1.09281	-0.874302	0.417872	1.08936	0.406707	0.747061	0.534725	1.10907	1.50746
29810	10341921	---	---	---	-0.968693	0.380617	0.830308	0.369588	8.60988	10	0	0	-1.799	0	-1.54975	-0.771035	-0.685144	-1.22177	-0.526785	-1.05767	0.795655	0.887944	0.213266	0.652144	1.14802	1.37248	0.742658
23119	10571696	NM_009810	Casp3	Mus musculus caspase 3 (Casp3), mRNA.	-0.968581	0.283319	0.830212	0.436842	8.92288	10	0	0	-1.79879	0	-0.902437	-1.17555	-1.32424	-1.05116	-0.516003	-0.842099	1.1865	0.184418	0.287463	0.842007	1.32752	0.933679	1.0499
17043	10515090	NM_007671	Cdkn2c	Mus musculus cyclin-dependent kinase inhibitor 2C (p18, inhibits CDK4) (Cdkn2c), mRNA.	-0.96853	0.516674	0.830169	0.188272	8.08	6	0	0	-1.7987	0	-0.188282	-1.28975	-1.30539	-1.34317	-0.431751	-1.25283	0.898552	0.565455	0.876805	0.790126	0.610781	1.06885	1.00061
26476	10604019	NM_024461	1810037I17Rik	Mus musculus RIKEN cDNA 1810037I17 gene (1810037I17Rik), mRNA.	-0.968321	0.31871	0.829989	0.417148	8.79706	10	0	0	-1.79831	0	-1.29488	-0.951964	-1.34823	-0.993063	-0.594881	-0.6269	0.667652	0.680365	0.140565	1.14503	0.921368	1.47057	0.784376
23296	10573490	NM_133255	Hook2	Mus musculus hook homolog 2 (Drosophila) (Hook2), transcript variant 1, mRNA.	-0.968004	0.297468	0.829718	0.431345	8.84304	10	0	0	-1.79772	0	-1.02857	-0.828341	-1.43967	-0.527276	-1.01852	-0.965651	0.430258	0.65174	0.321484	0.812698	0.796893	1.49931	1.29564
27336	10387492	---	---	---	-0.967759	0.258765	0.829508	0.452634	8.93862	9	0	0	-1.79727	0	-0.945593	-1.14967	-1.22881	-1.15612	-0.585576	-0.740778	0.520063	0.31464	0.305917	1.28178	0.845508	1.30531	1.23334
14908	10494407	NM_175666	Hist2h2bb	Mus musculus histone cluster 2, H2bb (Hist2h2bb), mRNA.	-0.96768	0.177408	0.82944	0.484493	9.12597	7	0	0	-1.79712	0	-1.13776	-0.920116	-1.15386	-0.710565	-0.832167	-1.05162	0.54963	0.768264	0.612258	0.673542	0.442682	0.880152	1.87955
8942	10435712	AJ278965	Cd80	Mus musculus mRNA for CD80 antigen (Qoo609 gene), splice variant.	-0.967493	0.125581	0.829279	0.498492	9.20182	6	0	0	-1.79677	0	-1.0279	-0.939451	-1.01028	-1.15893	-0.848415	-0.819985	0.896067	0.377274	0.81499	1.26147	1.56663	0.801354	0.0871674
491	10350003	ENSMUST00000027726	Cyb5r1	cdna:known chromosome:NCBIM37:1:136302358:136308317:1 gene:ENSMUSG00000026456 gene_biotype:protein_coding transcript_biotype:protein_coding	-0.967371	0.232511	0.829176	0.465855	8.98126	9	0	0	-1.79655	0	-1.32372	-1.00732	-1.03537	-0.872442	-0.609664	-0.955707	0.584078	1.36614	0.370131	0.550129	0.403872	1.49349	1.0364
2928	10375382	NM_001045520	Clint1	Mus musculus clathrin interactor 1 (Clint1), mRNA.	-0.967297	0.268326	0.829112	0.449822	8.88208	9	0	0	-1.79641	0	-1.21631	-1.15898	-1.15108	-0.95359	-0.519157	-0.804664	0.779908	0.152722	0.516219	0.905511	1.22869	1.51811	0.702626
11106	10456904	NM_013831	Pstpip2	Mus musculus proline-serine-threonine phosphatase-interacting protein 2 (Pstpip2), mRNA.	-0.967286	0.237876	0.829103	0.463922	8.96214	9	0	0	-1.79639	0	-1.01094	-0.781955	-1.40459	-0.973294	-0.746074	-0.886863	1.01712	0.430894	0.450225	0.685338	1.59451	0.396387	1.22925
4045	10386604	ENSMUST00000018744	Shmt1	cdna:known chromosome:NCBIM37:11:60601606:60624767:-1 gene:ENSMUSG00000020534 gene_biotype:protein_coding transcript_biotype:protein_coding	-0.967266	0.215769	0.829085	0.472921	9.01449	8	0	0	-1.79635	0	-1.03988	-1.09528	-1.15267	-0.819124	-1.09982	-0.59682	0.35104	0.203274	0.482802	1.03627	1.16757	1.14843	1.41421
23873	10579602	NM_028189	B3gnt3	Mus musculus UDP-GlcNAc:betaGal beta-1,3-N-acetylglucosaminyltransferase 3 (B3gnt3), mRNA.	-0.967125	0.26518	0.828965	0.452057	8.87961	9	0	0	-1.79609	0	-1.17472	-1.20046	-1.10845	-1.03712	-0.550262	-0.73173	1.28883	0.164601	0.849449	0.903128	1.45723	0.708068	0.431447
11540	10461274	NM_176843	Ints5	Mus musculus integrator complex subunit 5 (Ints5), mRNA.	-0.9671	0.497807	0.828943	0.237773	8.08254	6	0	0	-1.79604	0	-1.18314	-1.48727	-1.02092	-1.10679	-0.985563	-0.0189143	0.597618	0.665508	0.621045	0.971854	0.900852	1.26262	0.783105
13984	10484999	NM_028119	Ddb2	Mus musculus damage specific DNA binding protein 2 (Ddb2), mRNA.	-0.966688	0.191975	0.828589	0.483545	9.02792	8	0	0	-1.79528	0	-1.07121	-1.04743	-1.20179	-0.829041	-0.663094	-0.987549	1.08498	0.464768	0.17698	1.42755	0.39476	1.29417	0.956914
6620	10412100	NM_011945	Map3k1	Mus musculus mitogen-activated protein kinase kinase kinase 1 (Map3k1), mRNA.	-0.966362	0.242704	0.82831	0.465414	8.88911	9	0	0	-1.79467	0	-1.25048	-1.23266	-1.03016	-0.689714	-0.849085	-0.746071	0.771233	0.319713	0.691365	1.00316	0.253359	1.2218	1.53754
11052	10456296	NM_172833	Malt1	Mus musculus mucosa associated lymphoid tissue lymphoma translocation gene 1 (Malt1), mRNA.	-0.966357	0.304891	0.828306	0.433877	8.71711	10	0	0	-1.79466	0	-1.23819	-0.898522	-1.28389	-1.15262	-0.624253	-0.600659	0.768671	0.375285	0.310641	0.609617	1.08276	1.47657	1.17461
2513	10371111	NM_013769	Tjp3	Mus musculus tight junction protein 3 (Tjp3), mRNA.	-0.966325	0.176906	0.828278	0.489643	9.03351	7	0	0	-1.7946	0	-1.1467	-0.983229	-0.996123	-0.817129	-1.14816	-0.706615	0.170217	1.48468	1.17465	0.244729	0.970395	1.08784	0.665431
16338	10508042	NM_027310	Meaf6	Mus musculus MYST/Esa1-associated factor 6 (Meaf6), mRNA.	-0.966234	0.14581	0.8282	0.498438	9.0824	7	0	0	-1.79443	0	-1.10863	-0.975592	-1.06255	-1.06538	-0.735401	-0.849844	0.726615	0.353574	0.170073	1.09631	1.19183	0.662462	1.59654
3958	10385842	NM_009012	Rad50	Mus musculus RAD50 homolog (S. cerevisiae) (Rad50), mRNA.	-0.966203	0.320913	0.828174	0.424791	8.65906	10	0	0	-1.79438	0	-1.31955	-0.947146	-1.18248	-1.18385	-0.597762	-0.566432	0.826762	0.46618	0.306807	1.11732	0.737586	1.59114	0.751421
7504	10420338	NM_025682	Pspc1	Mus musculus paraspeckle protein 1 (Pspc1), mRNA.	-0.966065	0.0916335	0.828056	0.509671	9.14266	6	0	0	-1.79412	0	-0.891937	-0.899662	-0.865824	-1.03413	-1.08766	-1.01718	0.573358	0.778528	0.136721	0.618192	0.70429	1.68051	1.30479
6420	10409990	NM_173381	6720489N17Rik	Mus musculus RIKEN cDNA 6720489N17 gene (6720489N17Rik), mRNA.	-0.965891	0.329048	0.827907	0.420902	8.6151	10	0	0	-1.7938	0	-1.07618	-0.890232	-1.28743	-1.3293	-0.485428	-0.726776	0.460758	1.01712	0.269855	1.46859	0.532101	1.08033	0.9666
1182	10357391	NM_027678	Zranb3	Mus musculus zinc finger, RAN-binding domain containing 3 (Zranb3), mRNA.	-0.965859	0.191564	0.827879	0.486745	8.97297	8	0	0	-1.79374	0	-1.09126	-0.954677	-1.28775	-0.8198	-0.838481	-0.803189	0.302797	1.05403	0.595549	1.03275	0.217546	1.60241	0.990065
19295	10538590	NM_025992	Herc6	Mus musculus hect domain and RLD 6 (Herc6), mRNA.	-0.965719	0.26861	0.827759	0.455938	8.78035	9	0	0	-1.79348	0	-1.12805	-0.732209	-1.33407	-1.13662	-0.679527	-0.783833	0.0962402	0.761502	1.1753	0.805986	0.708374	0.677708	1.5692
29671	10341204	---	---	---	-0.965681	0.299566	0.827726	0.439726	8.69119	10	0	0	-1.79341	0	-1.11267	-1.3896	-1.11709	-0.904707	-0.602907	-0.667115	0.524245	0.463899	0.220293	1.39407	0.84507	1.23191	1.11459
17076	10515368	NM_026654	Toe1	Mus musculus target of EGR1, member 1 (nuclear) (Toe1), mRNA.	-0.965629	0.323057	0.827682	0.425857	8.6179	10	0	0	-1.79331	0	-1.21984	-0.742182	-1.28663	-0.941254	-0.448346	-1.15552	0.464709	0.641464	0.186316	0.836808	1.09873	1.17704	1.3887
19118	10536976	NM_001164226	Nrf1	Mus musculus nuclear respiratory factor 1 (Nrf1), transcript variant 1, mRNA.	-0.965455	0.243285	0.827533	0.468644	8.82914	9	0	0	-1.79299	0	-1.12761	-1.06613	-1.00908	-1.20503	-0.53254	-0.852346	0.922929	0.150468	0.311051	0.682516	1.18534	1.12443	1.41599
1023	10355582	NM_176972	Usp37	Mus musculus ubiquitin specific peptidase 37 (Usp37), mRNA.	-0.965038	0.386776	0.827175	0.381815	8.37824	10	0	0	-1.79221	0	-1.2212	-1.20915	-1.25098	-1.1749	-0.487916	-0.446081	0.595858	0.473286	0.370379	0.972256	0.819102	1.448	1.11135
4930	10396237	NM_001163378	2700049A03Rik	Mus musculus RIKEN cDNA 2700049A03 gene (2700049A03Rik), transcript variant 1, mRNA.	-0.964997	0.219219	0.827141	0.48015	8.85675	8	0	0	-1.79214	0	-1.07041	-1.04243	-1.26734	-0.985193	-0.755009	-0.669595	0.993923	0.704112	0.484683	1.28815	0.208209	1.56691	0.543997
23428	10574812	NM_181322	Ctcf	Mus musculus CCCTC-binding factor (Ctcf), mRNA.	-0.964848	0.273229	0.827012	0.457074	8.71359	9	0	0	-1.79186	0	-1.24382	-1.09026	-1.22506	-0.934028	-0.576448	-0.719479	0.702113	0.270373	0.38669	0.923023	0.674152	1.35759	1.47515
15998	10504730	ENSMUST00000102926	Anp32b	cdna:known chromosome:NCBIM37:4:46463774:46485529:1 gene:ENSMUSG00000028333 gene_biotype:protein_coding transcript_biotype:protein_coding	-0.964787	0.353324	0.82696	0.409041	8.47388	10	0	0	-1.79175	0	-1.05046	-0.713016	-0.558094	-1.12978	-0.796066	-1.5413	1.05177	0.983073	0.423401	0.712839	1.51871	0.794981	0.303943
7728	10422854	NM_133227	Nup155	Mus musculus nucleoporin 155 (Nup155), mRNA.	-0.964649	0.363748	0.826842	0.40197	8.43253	10	0	0	-1.79149	0	-1.20023	-1.11941	-1.21325	-1.25676	-0.47125	-0.526995	1.02604	0.332836	0.266594	1.00394	0.702383	1.18871	1.26738
17412	10518561	NM_027263	Apitd1	Mus musculus apoptosis-inducing, TAF9-like domain 1 (Apitd1), mRNA.	-0.964489	0.335422	0.826705	0.422676	8.51277	10	0	0	-1.79119	0	-1.00615	-0.946851	-0.514104	-0.717026	-1.48766	-1.11514	1.18995	0.508462	0.165246	0.737215	0.804622	1.44338	0.938068
130	10345840	NM_177084	Slc9a4	Mus musculus solute carrier family 9 (sodium/hydrogen exchanger), member 4 (Slc9a4), mRNA.	-0.964371	0.259031	0.826603	0.46575	8.72123	9	0	0	-1.79097	0	-1.17035	-0.984821	-1.27433	-0.831971	-0.983096	-0.541658	0.0286728	1.3855	0.631372	1.10777	0.882401	0.538013	1.2125
9982	10445558	NM_207161	BC048355	Mus musculus cDNA sequence BC048355 (BC048355), mRNA.	-0.964171	0.375973	0.826432	0.394662	8.36599	10	0	0	-1.7906	0	-0.842238	-1.20994	-1.09719	-1.37887	-0.299498	-0.957288	0.38564	1.46066	0.523147	0.993346	1.13729	0.806539	0.478396
8568	10431424	NM_138749	Plxnb2	Mus musculus plexin B2 (Plxnb2), mRNA.	-0.964026	0.332012	0.826308	0.426861	8.49636	10	0	0	-1.79033	0	-1.4047	-1.22169	-1.05721	-0.854534	-0.486419	-0.7596	0.241091	0.409206	1.02114	0.806109	1.44105	0.670237	1.19532
4968	10396800	NM_181073	Plekhh1	Mus musculus pleckstrin homology domain containing, family H (with MyTH4 domain) member 1 (Plekhh1), mRNA.	-0.964016	0.177923	0.8263	0.49772	8.87804	7	0	0	-1.79032	0	-1.12391	-1.1453	-1.01872	-0.929886	-0.906144	-0.660132	1.00789	1.1896	0.0027549	0.9178	0.474008	1.52333	0.668719
4694	10393844	NM_011568	Alyref	Mus musculus Aly/REF export factor (Alyref), mRNA.	-0.964003	0.29652	0.826289	0.448199	8.59848	10	0	0	-1.79029	0	-0.938763	-0.695635	-1.20538	-0.566646	-1.03109	-1.34651	0.633536	0.789444	0.146232	0.481675	1.38907	1.29399	1.05007
17630	10520950	NM_016861	Pdlim1	Mus musculus PDZ and LIM domain 1 (elfin) (Pdlim1), mRNA.	-0.963975	0.35971	0.826264	0.407957	8.40748	10	0	0	-1.79024	0	-1.20681	-1.03818	-1.29816	-1.15516	-0.343488	-0.742054	1.16483	1.14822	0.503483	0.665685	1.22364	0.943576	0.134417
21850	10561527	NM_021895	Actn4	Mus musculus actinin alpha 4 (Actn4), mRNA.	-0.96396	0.37193	0.826251	0.398789	8.36746	10	0	0	-1.79021	0	-1.06859	-1.32414	-1.12579	-1.2637	-0.554799	-0.446727	0.782997	0.745131	0.120027	0.738802	1.1946	1.37731	0.824897
1398	10359861	NM_025569	Mgst3	Mus musculus microsomal glutathione S-transferase 3 (Mgst3), mRNA.	-0.963958	0.190528	0.82625	0.49403	8.85021	7	0	0	-1.79021	0	-0.902586	-1.07881	-0.843895	-1.16516	-1.12092	-0.672385	0.141843	1.76661	0.599622	0.996945	0.693199	0.717728	0.8678
6847	10414366	NR_027414	Fbxo34	Mus musculus F-box protein 34 (Fbxo34), transcript variant 4, non-coding RNA.	-0.963863	0.213808	0.826168	0.486375	8.79611	8	0	0	-1.79003	0	-0.92699	-1.09661	-1.16148	-1.10467	-0.914646	-0.578782	1.23581	0.519752	0.536691	0.568168	1.73764	0.776091	0.409022
18351	10528840	NM_018878	Paxip1	Mus musculus PAX interacting (with transcription-activation domain) protein 1 (Paxip1), mRNA.	-0.963832	0.347009	0.826141	0.417637	8.43928	10	0	0	-1.78997	0	-1.24515	-1.06901	-1.3278	-1.05496	-0.635101	-0.450966	1.48103	0.249936	0.439706	0.655897	1.12929	0.921902	0.905237
13150	10476889	NM_001110159	Nxt1	Mus musculus NTF2-related export protein 1 (Nxt1), transcript variant 1, mRNA.	-0.963762	0.248871	0.826082	0.472655	8.70896	9	0	0	-1.78984	0	-1.00152	-1.16211	-1.10796	-1.03306	-0.472267	-1.00566	0.857963	0.479778	0.0401139	1.36141	0.67514	1.04985	1.31831
18162	10526754	NM_021392	Ap4m1	Mus musculus adaptor-related protein complex AP-4, mu 1 (Ap4m1), mRNA.	-0.96374	0.394135	0.826063	0.381632	8.28253	10	0	0	-1.7898	0	-1.09068	-1.13977	-1.58552	-0.717787	-0.462896	-0.785793	0.754673	0.221899	0.636315	1.34449	1.23794	0.6769	0.910222
1269	10358454	NM_001166409	Rbm3	Mus musculus RNA binding motif protein 3 (Rbm3), transcript variant 2, mRNA.	-0.963715	0.314635	0.826041	0.438964	8.52978	10	0	0	-1.78976	0	-0.678198	-0.679665	-0.747348	-1.12224	-1.45631	-1.09852	1.53592	0.663943	0.572458	0.516543	1.35976	0.41418	0.719488
21428	10557843	NM_139149	Fus	Mus musculus fusion, derived from t(12;16) malignant liposarcoma (human) (Fus), mRNA.	-0.963305	0.35062	0.82569	0.417383	8.39839	10	0	0	-1.78899	0	-0.836662	-1.31208	-1.26314	-0.862117	-0.373231	-1.1326	1.04738	0.30253	0.417652	0.514462	0.975442	1.43047	1.09188
6517	10410919	---	---	cdna:genscan chromosome:NCBIM37:13:85574102:85713183:-1 transcript_biotype:protein_coding	-0.962765	0.275633	0.825227	0.463975	8.5811	9	0	0	-1.78799	0	-0.874152	-0.975528	-0.460243	-1.12847	-1.22706	-1.11113	0.979766	0.499323	0.72661	1.29514	0.892626	0.0242071	1.35892
126	10345777	NM_133193	Il1rl2	Mus musculus interleukin 1 receptor-like 2 (Il1rl2), mRNA.	-0.96259	0.280355	0.825077	0.462289	8.55843	10	0	0	-1.78767	0	-1.23345	-1.02912	-1.10516	-0.685504	-0.54689	-1.17541	0.100158	0.726756	0.49914	0.976183	1.38427	1.36779	0.721237
16733	10512195	NM_026872	Ubap2	Mus musculus ubiquitin-associated protein 2 (Ubap2), mRNA.	-0.96257	0.28222	0.82506	0.461421	8.55235	10	0	0	-1.78763	0	-1.34929	-1.11935	-0.978237	-1.05848	-0.627875	-0.64219	0.180049	0.748148	0.431872	1.25997	0.583039	1.40436	1.16798
25080	10591556	NM_026282	Spc24	Mus musculus SPC24, NDC80 kinetochore complex component, homolog (S. cerevisiae) (Spc24), mRNA.	-0.962558	0.132474	0.825049	0.51449	8.85658	6	0	0	-1.78761	0	-0.966049	-0.914322	-0.787996	-1.0447	-0.891888	-1.17039	0.498106	1.02162	0.0356616	0.888033	0.539466	1.59811	1.19435
10559	10450957	NM_031863	Cenpq	Mus musculus centromere protein Q (Cenpq), mRNA.	-0.962558	0.34921	0.825049	0.421548	8.3611	10	0	0	-1.78761	0	-1.44981	-1.10188	-1.24228	-0.675863	-0.636573	-0.668944	1.01633	0.188966	0.262152	1.26835	1.03917	0.952955	1.04742
19365	10539177	NM_138669	Eif4a3	Mus musculus eukaryotic translation initiation factor 4A3 (Eif4a3), mRNA.	-0.962529	0.280962	0.825025	0.462218	8.55325	10	0	0	-1.78755	0	-1.10723	-0.843477	-1.03744	-0.823711	-0.573018	-1.3903	0.429157	0.671309	0.0786913	0.850678	1.29755	1.25843	1.18935
19179	10537657	NM_001146351	Ephb6	Mus musculus Eph receptor B6 (Ephb6), transcript variant 1, mRNA.	-0.96251	0.326408	0.825008	0.436706	8.42629	10	0	0	-1.78752	0	-1.1144	-0.983586	-1.35007	-0.90223	-0.373094	-1.05168	1.0637	1.08664	0.687062	1.33762	0.120086	0.404066	1.07588
21946	10562563	NM_007633	Ccne1	Mus musculus cyclin E1 (Ccne1), mRNA.	-0.96238	0.0990806	0.824897	0.521324	8.88526	6	0	0	-1.78728	0	-1.10412	-0.849407	-0.932406	-0.914164	-1.06387	-0.910323	0.0579034	0.699947	0.247774	1.35598	0.947287	1.0537	1.41169
6846	10414360	NM_001145953	Lgals3	Mus musculus lectin, galactose binding, soluble 3 (Lgals3), transcript variant 1, mRNA.	-0.96207	0.322432	0.824631	0.440945	8.41295	10	0	0	-1.7867	0	-1.27544	-1.25853	-1.04344	-0.977717	-0.804909	-0.412381	1.27257	1.18928	0.200779	1.1212	1.00768	0.267997	0.712912
16797	10512774	NM_178893	Coro2a	Mus musculus coronin, actin binding protein 2A (Coro2a), transcript variant 1, mRNA.	-0.961798	0.327709	0.824398	0.438801	8.38252	10	0	0	-1.7862	0	-1.06286	-0.911845	-1.15386	-1.36213	-0.395037	-0.885063	1.00458	0.751496	0.0416375	0.460959	1.17583	1.24837	1.08792
6092	10407126	NM_152804	Plk2	Mus musculus polo-like kinase 2 (Plk2), mRNA.	-0.961661	0.351066	0.824281	0.424054	8.30625	10	0	0	-1.78594	0	-1.23532	-1.08872	-0.987857	-1.20424	-0.279378	-0.974453	1.02416	0.459263	0.460308	1.1685	1.53876	0.60458	0.514393
3171	10377673	NM_016887	Cldn7	Mus musculus claudin 7 (Cldn7), transcript variant 1, mRNA.	-0.961658	0.275932	0.824278	0.468072	8.51523	9	0	0	-1.78594	0	-1.18214	-1.33565	-1.04203	-0.768835	-0.593381	-0.847909	0.607854	0.311584	1.02897	1.05788	1.60791	0.283864	0.871895
18881	10534441	NM_148932	Pom121	Mus musculus nuclear pore membrane protein 121 (Pom121), mRNA.	-0.961578	0.443666	0.82421	0.344664	8.00416	9	0	0	-1.78579	0	-1.44665	-1.20436	-0.844448	-1.33795	-0.622	-0.314065	0.909949	0.357778	0.415501	1.01617	0.694077	1.1538	1.2222
22008	10563130	NM_145954	Aldh16a1	Mus musculus aldehyde dehydrogenase 16 family, member A1 (Aldh16a1), mRNA.	-0.961575	0.276648	0.824207	0.468036	8.50858	9	0	0	-1.78578	0	-1.0814	-1.14102	-1.04278	-1.00307	-0.405072	-1.09611	0.477004	0.0925465	0.616068	1.0451	0.917614	1.51617	1.10495
26344	10603011	NM_009031	Rbbp7	Mus musculus retinoblastoma binding protein 7 (Rbbp7), mRNA.	-0.961532	0.253463	0.824171	0.479013	8.56314	9	0	0	-1.7857	0	-1.34788	-0.946189	-1.14915	-0.65813	-0.756811	-0.911029	0.807301	0.327844	0.499045	0.699982	1.08088	1.76613	0.588011
24672	10586844	NM_007399	Adam10	Mus musculus a disintegrin and metallopeptidase domain 10 (Adam10), mRNA.	-0.961251	0.388982	0.823929	0.397372	8.16731	10	0	0	-1.78518	0	-1.33359	-1.38505	-1.20236	-0.692354	-0.656676	-0.497474	0.528877	0.307144	0.785831	1.2378	1.44509	0.637604	0.825159
5950	10405874	---	---	cdna:known chromosome:NCBIM37:13:65995145:65995681:-1 gene:ENSMUSG00000074841 gene_biotype:pseudogene transcript_biotype:retrotransposed	-0.961246	0.267775	0.823925	0.473561	8.51165	9	0	0	-1.78517	0	-0.831566	-0.795218	-0.705338	-0.863921	-1.16611	-1.40532	0.983766	0.907341	0.30132	1.34921	0.381938	0.39781	1.44608
6444	10410207	---	---	cdna:known chromosome:NCBIM37:13:65995145:65995681:-1 gene:ENSMUSG00000074841 gene_biotype:pseudogene transcript_biotype:retrotransposed	-0.961246	0.267775	0.823925	0.473561	8.51165	9	0	0	-1.78517	0	-0.831566	-0.795218	-0.705338	-0.863921	-1.16611	-1.40532	0.983766	0.907341	0.30132	1.34921	0.381938	0.39781	1.44608
12257	10468639	NM_018831	Dclre1a	Mus musculus DNA cross-link repair 1A, PSO2 homolog (S. cerevisiae) (Dclre1a), mRNA.	-0.961137	0.37199	0.823831	0.411203	8.2144	10	0	0	-1.78497	0	-1.35342	-1.13895	-1.26053	-0.966743	-0.393574	-0.653598	1.14288	0.229568	0.361936	1.12229	0.683458	1.30019	0.926496
17073	10515337	NM_016777	Nasp	Mus musculus nuclear autoantigenic sperm protein (histone-binding) (Nasp), transcript variant 2, mRNA.	-0.960872	0.147681	0.823605	0.516886	8.72792	7	0	0	-1.78448	0	-1.13284	-0.954142	-1.11978	-0.93889	-0.746383	-0.873191	0.829888	0.178592	0.192846	0.806072	0.856048	1.43153	1.47025
18903	10534694	NM_031405	Srrt	Mus musculus serrate RNA effector molecule homolog (Arabidopsis) (Srrt), transcript variant 1, mRNA.	-0.960855	0.182511	0.82359	0.507592	8.67024	7	0	0	-1.78444	0	-1.12091	-1.09053	-1.10241	-0.928506	-0.869689	-0.653085	0.600962	0.430135	0.158272	0.605085	1.13806	1.57382	1.2588
18122	10526319	NM_011714	Baz1b	Mus musculus bromodomain adjacent to zinc finger domain, 1B (Baz1b), mRNA.	-0.960752	0.212024	0.823502	0.49831	8.60787	8	0	0	-1.78425	0	-1.31645	-0.933722	-0.894652	-0.74075	-1.08753	-0.791407	0.209095	0.62291	0.48262	0.836015	0.632381	1.61082	1.37067
17751	10522411	NM_181323	Cwh43	Mus musculus cell wall biogenesis 43 C-terminal homolog (S. cerevisiae) (Cwh43), mRNA.	-0.960673	0.066869	0.823434	0.531347	8.8027	6	0	0	-1.78411	0	-0.989397	-1.07831	-0.919813	-0.920068	-0.96191	-0.894539	1.43909	0.0483523	0.519075	1.49593	0.759464	0.472901	1.02924
20410	10548857	NM_175652	Hist4h4	Mus musculus histone cluster 4, H4 (Hist4h4), mRNA.	-0.960564	0.307088	0.823341	0.455917	8.37122	10	0	0	-1.7839	0	-0.847091	-0.763529	-0.787917	-0.688774	-1.46287	-1.2132	0.405021	1.40919	0.616512	0.788663	0.342141	0.714078	1.48778
3200	10378024	ENSMUST00000048807	Mis12	cdna:known chromosome:NCBIM37:11:70833113:70840873:1 gene:ENSMUSG00000040599 gene_biotype:protein_coding transcript_biotype:protein_coding	-0.96034	0.168762	0.823148	0.513334	8.66227	7	0	0	-1.78349	0	-1.10537	-0.799003	-1.22881	-0.857776	-0.913363	-0.857707	0.260456	0.45128	0.221697	1.19277	0.921245	1.51149	1.20311
10147	10447395	NM_008628	Msh2	Mus musculus mutS homolog 2 (E. coli) (Msh2), mRNA.	-0.96009	0.358466	0.822935	0.425504	8.2	10	0	0	-1.78303	0	-1.31611	-1.20269	-1.30899	-0.774997	-0.650415	-0.507332	0.729972	0.13756	0.628201	0.988944	0.734993	1.52948	1.01139
1489	10360679	NM_008210	H3f3a	Mus musculus H3 histone, family 3A (H3f3a), mRNA.	-0.959982	0.317144	0.822842	0.452443	8.31184	10	0	0	-1.78282	0	-1.32889	-1.03587	-0.990316	-1.11623	-0.383144	-0.905449	1.39829	0.910923	1.38876	0.69152	0.651981	0.143886	0.57454
17932	10524105	NM_172717	Chfr	Mus musculus checkpoint with forkhead and ring finger domains (Chfr), mRNA.	-0.959897	0.228985	0.822769	0.495106	8.52204	8	0	0	-1.78267	0	-1.24906	-0.982693	-0.832204	-1.06332	-1.0502	-0.581905	1.3589	0.117985	0.222301	1.06055	0.993132	1.29935	0.707163
13044	10475866	NM_207680	Bcl2l11	Mus musculus BCL2-like 11 (apoptosis facilitator) (Bcl2l11), transcript variant 1, mRNA.	-0.959816	0.431256	0.8227	0.366233	7.9591	9	0	0	-1.78252	0	-1.36846	-1.40203	-0.953514	-0.655239	-1.09528	-0.284381	1.18743	0.71522	0.105473	1.0279	0.851402	1.13231	0.739167
8706	10433088	NM_007626	Cbx5	Mus musculus chromobox 5 (Cbx5), transcript variant 1, mRNA.	-0.959794	0.303854	0.822681	0.460708	8.33718	10	0	0	-1.78247	0	-1.15695	-1.1679	-1.30093	-0.898234	-0.506042	-0.728706	0.280614	0.651988	0.379792	1.33279	0.603638	1.4453	1.06464
3169	10377652	NM_019726	Gps2	Mus musculus G protein pathway suppressor 2 (Gps2), mRNA.	-0.959596	0.243697	0.822511	0.490313	8.47261	9	0	0	-1.78211	0	-1.13781	-0.51643	-0.909265	-1.04943	-1.20031	-0.944322	1.70202	0.673651	0.750442	0.204969	1.22339	0.631806	0.571291
3599	10382200	NM_029606	Ccdc46	Mus musculus coiled-coil domain containing 46 (Ccdc46), transcript variant 2, mRNA.	-0.959579	0.279559	0.822496	0.474163	8.38737	9	0	0	-1.78208	0	-0.635783	-0.750997	-0.964654	-1.08746	-0.888858	-1.42972	1.3101	1.15864	0.294142	1.38519	0.489893	0.837022	0.282487
8084	10426650	NM_009448	Tuba1c	Mus musculus tubulin, alpha 1C (Tuba1c), mRNA.	-0.959461	0.501183	0.822395	0.284705	7.70769	7	0	0	-1.78186	0	-1.39765	-1.15109	-1.19058	-1.26372	-0.0587682	-0.694964	0.419975	0.911225	0.552698	1.00062	1.11288	0.633653	1.12572
1841	10364287	NM_019929	Sumo3	Mus musculus SMT3 suppressor of mif two 3 homolog 3 (yeast) (Sumo3), mRNA.	-0.959455	0.388836	0.82239	0.40547	8.07551	10	0	0	-1.78184	0	-1.30216	-1.23827	-0.420762	-0.556401	-1.28819	-0.950945	1.38145	0.637625	0.864313	0.316052	0.786441	1.31692	0.453929
2013	10365971	NM_007569	Btg1	Mus musculus B cell translocation gene 1, anti-proliferative (Btg1), mRNA.	-0.95935	0.463506	0.8223	0.334278	7.83043	8	0	0	-1.78165	0	-0.992028	-0.537355	-1.26451	-0.370942	-1.6344	-0.956865	0.615266	1.34696	0.506413	1.02306	0.87877	0.989043	0.396583
24513	10585186	NM_029639	1600029D21Rik	Mus musculus RIKEN cDNA 1600029D21 gene (1600029D21Rik), mRNA.	-0.959296	0.457449	0.822254	0.34144	7.84808	9	0	0	-1.78155	0	-1.43644	-1.03654	-1.50739	-0.858716	-0.447445	-0.469247	0.752811	0.691134	0.409463	1.26172	1.11575	1.09461	0.430295
28759	10607806	---	---	---	-0.959217	0.281653	0.822186	0.474492	8.36196	9	0	0	-1.7814	0	-0.931734	-1.2194	-0.968575	-1.33158	-0.633393	-0.670618	1.41725	0.30327	0.452975	0.514221	0.527087	1.20813	1.33237
4086	10387138	NM_173754	Usp43	Mus musculus ubiquitin specific peptidase 43 (Usp43), mRNA.	-0.959118	0.300391	0.822101	0.465193	8.30912	10	0	0	-1.78122	0	-1.21439	-1.34193	-0.721182	-1.06975	-0.56202	-0.845433	1.63965	0.526858	0.218839	0.487682	0.967352	1.02619	0.888134
2996	10375903	NM_029976	Cdkn2aipnl	Mus musculus CDKN2A interacting protein N-terminal like (Cdkn2aipnl), mRNA.	-0.959095	0.391111	0.822081	0.40523	8.05036	10	0	0	-1.78118	0	-1.41411	-1.06366	-1.29319	-0.881008	-0.771001	-0.331589	0.503518	0.485902	0.216044	1.11325	1.17595	1.17419	1.08571
15606	10501091	ENSMUST00000061772	Rbm15	cdna:known chromosome:NCBIM37:3:107128863:107136591:-1 gene:ENSMUSG00000048109 gene_biotype:protein_coding transcript_biotype:protein_coding	-0.958804	0.223481	0.821832	0.501097	8.47009	8	0	0	-1.78064	0	-1.28058	-0.936234	-1.08864	-1.00031	-0.814025	-0.633034	0.694384	0.284499	0.271154	0.84038	0.748584	1.24954	1.66429
4551	10392056	NM_007805	Cyb561	Mus musculus cytochrome b-561 (Cyb561), mRNA.	-0.958712	0.472961	0.821753	0.326552	7.76942	8	0	0	-1.78047	0	-1.20732	-1.31878	-1.55476	-0.798912	-0.42484	-0.447658	0.718129	0.639682	0.321493	1.20429	1.24792	0.716944	0.903815
10468	10450384	NM_013600	Msh5	Mus musculus mutS homolog 5 (E. coli) (Msh5), transcript variant 1, mRNA.	-0.958684	0.153012	0.82173	0.523101	8.58664	7	0	0	-1.78041	0	-0.976033	-0.855607	-0.827437	-0.827437	-1.05845	-1.20715	1.75302	0.510912	0.459912	0.734153	0.673705	1.31869	0.301705
8888	10435024	NM_027355	Rnf168	Mus musculus ring finger protein 168 (Rnf168), mRNA.	-0.958623	0.258491	0.821677	0.487527	8.38395	9	0	0	-1.7803	0	-1.25762	-0.910389	-1.27826	-0.913347	-0.684528	-0.707593	0.700115	0.437096	0.0716945	1.03247	1.11092	1.57854	0.820897
19496	10540472	NM_011498	Bhlhe40	Mus musculus basic helix-loop-helix family, member e40 (Bhlhe40), mRNA.	-0.958592	0.1805	0.821651	0.516065	8.53795	7	0	0	-1.78024	0	-1.17257	-1.01004	-1.14445	-0.760126	-0.766701	-0.897668	1.1777	0.0993892	0.0850151	1.09727	0.879884	1.33232	1.07997
12613	10472235	NM_029723	Dapl1	Mus musculus death associated protein-like 1 (Dapl1), mRNA.	-0.958497	0.228554	0.821569	0.500282	8.44205	8	0	0	-1.78007	0	-1.23502	-1.0257	-0.99166	-1.12523	-0.728737	-0.644632	1.48078	0.0551699	0.698219	1.07016	1.25831	0.827174	0.361161
4981	10396952	NM_001033149	Ttc9	Mus musculus tetratricopeptide repeat domain 9 (Ttc9), mRNA.	-0.958418	0.155314	0.821501	0.523443	8.56738	7	0	0	-1.77992	0	-1.17706	-1.03831	-0.925055	-1.0143	-0.870863	-0.724918	1.23487	1.13668	0.762909	1.14475	1.27767	0.157548	0.0360741
14146	10486833	NM_145973	Ell3	Mus musculus elongation factor RNA polymerase II-like 3 (Ell3), mRNA.	-0.958397	0.180022	0.821483	0.516878	8.52727	7	0	0	-1.77988	0	-0.807069	-0.848134	-0.944885	-0.910475	-0.929739	-1.31008	0.849381	0.268062	0.307898	1.67599	0.467242	0.965796	1.21601
475	10349868	NM_133819	Ppp1r15b	Mus musculus protein phosphatase 1, regulatory (inhibitor) subunit 15b (Ppp1r15b), mRNA.	-0.958267	0.394314	0.821372	0.406276	7.99938	10	0	0	-1.77964	0	-1.1771	-0.9991	-1.3713	-1.23192	-0.353561	-0.616632	0.550927	0.275639	0.423053	0.900088	1.08784	1.20273	1.30933
21158	10555576	ENSMUST00000106978	3200002M19Rik	cdna:known chromosome:NCBIM37:7:109029839:109048057:1 gene:ENSMUSG00000030649 gene_biotype:protein_coding transcript_biotype:protein_coding	-0.958233	0.200616	0.821342	0.511091	8.48147	8	0	0	-1.77958	0	-0.843713	-0.964038	-0.933025	-0.663062	-1.1085	-1.23706	0.105958	1.09961	0.0510905	1.04989	1.15329	1.22584	1.06372
19499	10540507	NM_008210	H3f3a	Mus musculus H3 histone, family 3A (H3f3a), mRNA.	-0.958071	0.410168	0.821204	0.393867	7.94119	10	0	0	-1.77927	0	-1.34277	-1.10107	-1.24241	-1.04275	-0.207489	-0.81194	1.15614	0.698452	1.37972	0.993015	0.800785	0.225023	0.495284
8014	10425966	NM_016843	Atxn10	Mus musculus ataxin 10 (Atxn10), mRNA.	-0.958011	0.290117	0.821153	0.474764	8.27491	10	0	0	-1.77916	0	-1.24979	-0.870884	-0.861572	-1.10317	-0.466878	-1.19578	0.646091	0.745051	0.111765	1.03643	0.450839	1.43806	1.31984
9276	10438889	AK035350	9530020O07Rik	Mus musculus adult male urinary bladder cDNA, RIKEN full-length enriched library, clone:9530020O07 product:hypothetical protein, full insert sequence.	-0.957974	0.161687	0.82112	0.523345	8.53165	7	0	0	-1.77909	0	-0.964561	-0.929372	-0.720483	-1.18513	-0.870885	-1.07741	1.31661	0.335634	0.00795984	1.27352	0.530168	1.08864	1.19532
1388	10359770	NM_198934	Pou2f1	Mus musculus POU domain, class 2, transcription factor 1 (Pou2f1), transcript variant 4, mRNA.	-0.957704	0.388845	0.820889	0.413078	7.98804	10	0	0	-1.77859	0	-1.3761	-1.07679	-1.19786	-1.13678	-0.380895	-0.577812	1.2935	0.254421	0.576229	0.599961	1.19609	0.586564	1.23947
5952	10405888	---	---	cdna:known chromosome:NCBIM37:13:66965460:66966011:1 gene:ENSMUSG00000071294 gene_biotype:pseudogene transcript_biotype:retrotransposed	-0.957643	0.243805	0.820837	0.49731	8.36176	8	0	0	-1.77848	0	-0.896659	-0.787017	-0.637083	-0.994636	-1.09788	-1.33258	0.965043	0.864362	0.341882	1.42209	0.345547	0.341882	1.46505
13358	10478997	NM_009335	Tfap2c	Mus musculus transcription factor AP-2, gamma (Tfap2c), transcript variant 1, mRNA.	-0.957549	0.25576	0.820756	0.492622	8.33039	9	0	0	-1.7783	0	-0.925509	-1.17534	-1.35026	-0.857119	-0.722836	-0.714226	0.479955	0.36322	0.175996	1.51989	0.933362	1.22034	1.05252
9212	10438313	NM_033324	Dgcr8	Mus musculus DiGeorge syndrome critical region gene 8 (Dgcr8), mRNA.	-0.957437	0.245545	0.820661	0.497332	8.34661	9	0	0	-1.7781	0	-1.06248	-1.04421	-1.23151	-1.08691	-0.576709	-0.742808	1.13799	0.246947	0.17655	0.577758	0.893288	1.38569	1.3264
6272	10408531	NM_146041	Gmds	Mus musculus GDP-mannose 4, 6-dehydratase (Gmds), mRNA.	-0.957344	0.226412	0.820581	0.505168	8.38121	8	0	0	-1.77793	0	-1.15195	-0.856972	-1.15404	-1.15376	-0.635119	-0.792221	0.829718	0.631445	1.23279	0.175334	1.70665	0.506437	0.661694
7792	10423663	NM_177151	Vps13b	Mus musculus vacuolar protein sorting 13B (yeast) (Vps13b), mRNA.	-0.957263	0.498288	0.820511	0.302148	7.62048	7	0	0	-1.77777	0	-1.49576	-1.15093	-1.38766	-0.951858	-0.206655	-0.550712	1.01639	0.416473	0.517346	0.771851	1.13876	1.18772	0.695036
7095	10416290	NM_180588	Reep4	Mus musculus receptor accessory protein 4 (Reep4), mRNA.	-0.957225	0.37069	0.820479	0.42875	8.01754	10	0	0	-1.7777	0	-1.31522	-1.23961	-1.07197	-1.08236	-0.694413	-0.339769	0.453143	1.09654	0.157481	1.39985	0.691444	0.808531	1.13637
5760	10404069	NM_030609	Hist1h1a	Mus musculus histone cluster 1, H1a (Hist1h1a), mRNA.	-0.957137	0.437928	0.820403	0.372604	7.8103	9	0	0	-1.77754	0	-0.72792	-0.566353	-0.776626	-0.648812	-1.43658	-1.58653	0.343626	0.992639	0.581793	0.527351	0.766009	1.13595	1.39545
26207	10601673	ENSMUST00000033609	Cstf2	cdna:known chromosome:NCBIM37:X:130593736:130621358:1 gene:ENSMUSG00000031256 gene_biotype:protein_coding transcript_biotype:protein_coding	-0.957096	0.273909	0.820368	0.48608	8.26434	9	0	0	-1.77746	0	-1.06104	-1.03561	-1.40489	-0.867287	-0.644847	-0.728897	0.942388	0.310059	0.0302893	1.02176	0.850597	1.41307	1.17441
21742	10560672	NM_023224	Cblc	Mus musculus Casitas B-lineage lymphoma c (Cblc), transcript variant 1, mRNA.	-0.957038	0.21699	0.820318	0.509673	8.38255	8	0	0	-1.77736	0	-1.23553	-1.1139	-0.97454	-1.01342	-0.695116	-0.709715	0.529759	0.9825	0.375037	0.80696	1.88443	0.622159	0.541377
13590	10481525	NM_144884	Tor1a	Mus musculus torsin family 1, member A (torsin A) (Tor1a), mRNA.	-0.956999	0.377243	0.820285	0.424909	7.98739	10	0	0	-1.77728	0	-1.00086	-0.845836	-0.967365	-0.717624	-0.559274	-1.65104	1.29964	0.756918	0.103217	1.01741	0.617561	0.650884	1.29636
26355	10603135	NM_001146081	Fancb	Mus musculus Fanconi anemia, complementation group B (Fancb), transcript variant 1, mRNA.	-0.95694	0.310751	0.820234	0.467846	8.16602	10	0	0	-1.77717	0	-1.16047	-0.98995	-1.27044	-1.15815	-0.679661	-0.482958	1.00922	0.450096	0.150586	1.12984	0.436658	1.17881	1.38642
921	10354432	NM_001161817	Myo1b	Mus musculus myosin IB (Myo1b), transcript variant 1, mRNA.	-0.956915	0.341349	0.820213	0.449823	8.08407	10	0	0	-1.77713	0	-1.43242	-1.1006	-1.15401	-0.882053	-0.677179	-0.495238	0.80924	0.85064	0.0595905	0.769578	1.05436	1.55815	0.639926
18210	10527268	ENSMUST00000148011	Pms2	cdna:known chromosome:NCBIM37:5:144670833:144694837:1 gene:ENSMUSG00000079109 gene_biotype:protein_coding transcript_biotype:protein_coding	-0.956761	0.080982	0.820081	0.542699	8.55204	6	0	0	-1.77684	0	-1.10763	-0.917	-0.980216	-0.941025	-0.914505	-0.880187	0.976221	0.264685	0.0985206	0.886844	0.572267	1.45796	1.48406
16211	10506843	NM_177045	Cc2d1b	Mus musculus coiled-coil and C2 domain containing 1B (Cc2d1b), mRNA.	-0.956689	0.178026	0.820019	0.523291	8.43176	7	0	0	-1.77671	0	-1.19496	-0.922874	-1.013	-0.755119	-0.761265	-1.09291	1.39004	0.78356	0.075407	0.792576	0.270721	1.48734	0.940496
17613	10520753	NM_027221	Krtcap3	Mus musculus keratinocyte associated protein 3 (Krtcap3), mRNA.	-0.956558	0.369655	0.819907	0.432245	7.98745	10	0	0	-1.77647	0	-1.36106	-1.26595	-1.11799	-0.819947	-0.817744	-0.356654	0.999921	0.297445	0.67262	0.802241	1.66821	0.738683	0.560236
23860	10579468	NM_001163042	Haus8	Mus musculus 4HAUS augmin-like complex, subunit 8 (Haus8), transcript variant 1, mRNA.	-0.956534	0.200897	0.819886	0.516875	8.38416	8	0	0	-1.77642	0	-1.16086	-0.945975	-1.17997	-0.682238	-0.774259	-0.995898	0.0940145	0.87841	0.61349	1.2574	0.38576	0.886688	1.62344
11227	10458138	NM_030147	Brd8	Mus musculus bromodomain containing 8 (Brd8), mRNA.	-0.956531	0.258932	0.819884	0.494906	8.26781	9	0	0	-1.77642	0	-1.19018	-1.1858	-1.19736	-0.751286	-0.664318	-0.750239	0.797471	0.413959	0.306004	1.03134	0.329817	1.35908	1.50152
5770	10404187	NM_019551	Tdp2	Mus musculus tyrosyl-DNA phosphodiesterase 2 (Tdp2), mRNA.	-0.956477	0.220593	0.819838	0.510338	8.34433	8	0	0	-1.77631	0	-0.941683	-0.84606	-0.789745	-0.777519	-1.01844	-1.36541	0.685386	0.546066	-0.0172996	1.06262	0.654202	1.41098	1.39691
16544	10510286	NM_027985	Mad2l2	Mus musculus MAD2 mitotic arrest deficient-like 2 (Mad2l2), mRNA.	-0.956472	0.358934	0.819833	0.440058	8.01336	10	0	0	-1.77631	0	-0.929538	-0.92529	-0.486102	-0.825607	-0.980597	-1.5917	1.21952	0.0792883	1.00044	1.15193	0.545593	1.21043	0.531627
14491	10490352	NM_001081092	Taf4a	Mus musculus TAF4A RNA polymerase II, TATA box binding protein (TBP)-associated factor (Taf4a), mRNA.	-0.956387	0.245485	0.81976	0.501096	8.28901	8	0	0	-1.77615	0	-1.18697	-1.05544	-0.955842	-0.80957	-1.18161	-0.548891	0.673298	0.661258	0.154145	0.648895	0.593065	1.48844	1.51922
24646	10586454	AK050877	D030028M11Rik	Mus musculus 9 days embryo whole body cDNA, RIKEN full-length enriched library, clone:D030028M11 product:unclassifiable, full insert sequence.	-0.956379	0.381776	0.819753	0.424127	7.9439	10	0	0	-1.77613	0	-0.664445	-0.856625	-0.49647	-0.896214	-1.44968	-1.37483	1.04576	0.747773	0.191579	1.29772	1.03031	1.12041	0.304722
16657	10511560	NM_194055	Esrp1	Mus musculus epithelial splicing regulatory protein 1 (Esrp1), mRNA.	-0.956353	0.334728	0.819731	0.456144	8.0733	10	0	0	-1.77608	0	-1.21635	-1.21807	-1.27657	-0.86195	-0.711551	-0.453622	0.736582	1.00466	0.0107041	1.14354	0.493695	0.962403	1.38653
3482	10380927	NM_010346	Grb7	Mus musculus growth factor receptor bound protein 7 (Grb7), mRNA.	-0.956025	0.508087	0.81945	0.295761	7.535	7	0	0	-1.77548	0	-1.40422	-1.3726	-1.20629	-0.684928	-0.994546	-0.0735653	0.405268	0.849738	0.829109	1.09927	0.862202	1.21327	0.477295
30088	10343284	---	---	---	-0.956008	0.291105	0.819435	0.481709	8.16585	10	0	0	-1.77544	0	-0.958748	-1.37778	-0.665754	-1.01701	-0.59496	-1.1218	1.69925	0.323745	0.331619	0.699102	0.740606	0.78653	1.15519
12977	10474998	---	---	ncrna:rRNA chromosome:NCBIM37:2:119456854:119456972:1 gene:ENSMUSG00000064906 gene_biotype:rRNA transcript_biotype:rRNA	-0.956005	0.161679	0.819433	0.529991	8.41791	7	0	0	-1.77544	0	-0.85152	-0.738539	-1.0488	-1.08404	-1.15212	-0.861004	0.220077	0.80019	0.371064	1.30593	0.294127	1.3534	1.39124
22784	10568480	NM_001162855	Nsmce4a	Mus musculus non-SMC element 4 homolog A (S. cerevisiae) (Nsmce4a), mRNA.	-0.955976	0.308112	0.819408	0.472932	8.1226	10	0	0	-1.77538	0	-1.29027	-1.18244	-1.14237	-0.932971	-0.509746	-0.678062	1.28158	0.0687578	0.401518	0.624784	0.888152	1.26157	1.20949
12852	10473919	ENSMUST00000111338	Ckap5	cdna:known chromosome:NCBIM37:2:91366919:91460821:1 gene:ENSMUSG00000040549 gene_biotype:protein_coding transcript_biotype:protein_coding	-0.955913	0.195486	0.819354	0.520724	8.35891	7	0	0	-1.77527	0	-1.13699	-1.07534	-1.11566	-0.981133	-0.709887	-0.716464	0.392481	0.516232	0.254829	1.03593	0.587496	1.27973	1.66878
12166	10467420	NM_016861	Pdlim1	Mus musculus PDZ and LIM domain 1 (elfin) (Pdlim1), mRNA.	-0.955901	0.428775	0.819344	0.387084	7.78151	10	0	0	-1.77525	0	-1.14863	-1.14356	-1.30409	-1.289	-0.265195	-0.584933	1.28014	0.892144	0.585329	0.568528	1.32274	0.824192	0.262331
14863	10493990	NM_016740	S100a11	Mus musculus S100 calcium binding protein A11 (calgizzarin) (S100a11), mRNA.	-0.955884	0.272405	0.819329	0.491186	8.20297	9	0	0	-1.77521	0	-1.08981	-1.21359	-1.10493	-1.09768	-0.538931	-0.690361	1.05741	0.718677	0.354031	0.88542	1.21715	0.0468999	1.45572
6042	10406733	ENSMUST00000045909	Zbed3	cdna:known chromosome:NCBIM37:13:96095192:96107796:1 gene:ENSMUSG00000041995 gene_biotype:protein_coding transcript_biotype:protein_coding	-0.955868	0.362237	0.819315	0.440243	7.97427	10	0	0	-1.77518	0	-1.20731	-0.901764	-1.28274	-0.282482	-0.934259	-1.12665	0.275049	1.55028	1.20678	0.479522	0.71951	0.597533	0.906534
28205	10522944	---	---	---	-0.955862	0.246779	0.819311	0.502423	8.25785	8	0	0	-1.77517	0	-0.804585	-1.36239	-0.805445	-1.10547	-0.689053	-0.968229	0.765969	0.461312	0.676366	1.23204	0.307345	0.547269	1.74488
24855	10589004	NM_133794	Qars	Mus musculus glutaminyl-tRNA synthetase (Qars), transcript variant 1, mRNA.	-0.955855	0.47881	0.819305	0.334895	7.62272	8	0	0	-1.77516	0	-1.1896	-0.518154	-0.899381	-0.29261	-1.2944	-1.54098	0.805433	1.06988	0.490513	0.867864	1.40955	0.57459	0.517297
7845	10424363	NM_026746	Nsmce2	Mus musculus non-SMC element 2 homolog (MMS21, S. cerevisiae) (Nsmce2), transcript variant 1, mRNA.	-0.955638	0.314594	0.819118	0.47064	8.089	10	0	0	-1.77476	0	-1.16815	-0.705996	-1.10713	-0.788809	-0.572475	-1.39126	1.57337	0.0996587	0.708755	0.568512	1.22082	0.82196	0.740752
780	10352954	NM_008253	Hmgb3	Mus musculus high mobility group box 3 (Hmgb3), mRNA.	-0.955525	0.392897	0.819021	0.419211	7.87068	10	0	0	-1.77455	0	-1.30958	-1.08211	-1.2326	-1.04381	-0.225897	-0.839151	1.22866	0.100614	0.780115	1.03689	1.05496	0.405237	1.12667
7352	10419073	NM_145928	Tspan14	Mus musculus tetraspanin 14 (Tspan14), mRNA.	-0.955444	0.207897	0.818952	0.518312	8.31104	8	0	0	-1.7744	0	-1.15279	-0.921063	-1.16149	-0.922732	-0.98211	-0.592481	0.547746	1.3949	-0.0127686	1.27177	0.810732	0.468766	1.25151
13719	10483249	NM_015736	Galnt3	Mus musculus UDP-N-acetyl-alpha-D-galactosamine:polypeptide N-acetylgalactosaminyltransferase 3 (Galnt3), mRNA.	-0.955372	0.416554	0.81889	0.400402	7.79396	10	0	0	-1.77426	0	-1.25159	-1.24912	-1.23218	-1.10273	-0.247082	-0.64953	0.784633	0.371711	0.600315	0.783042	1.65531	0.709148	0.828072
24878	10589420	NM_007658	Cdc25a	Mus musculus cell division cycle 25A (Cdc25a), mRNA.	-0.955359	0.425178	0.818879	0.392835	7.76748	10	0	0	-1.77424	0	-1.2652	-1.28416	-1.26129	-1.06667	-0.562212	-0.292621	0.491381	0.453527	0.298905	1.01291	1.02239	1.26776	1.18528
15166	10497237	ENSMUST00000161949	Pag1	cdna:known chromosome:NCBIM37:3:9687479:9833679:-1 gene:ENSMUSG00000027508 gene_biotype:protein_coding transcript_biotype:protein_coding	-0.955316	0.310813	0.818842	0.473937	8.08201	10	0	0	-1.77416	0	-1.34169	-1.08647	-1.13126	-0.855117	-0.435576	-0.881776	0.961157	1.12656	0.206749	0.873113	1.07021	0.121893	1.37222
12474	10470788	ENSMUST00000046571	Odf2	cdna:novel chromosome:NCBIM37:2:29745415:29787266:1 gene:ENSMUSG00000026790 gene_biotype:protein_coding transcript_biotype:protein_coding	-0.955304	0.22522	0.818832	0.512729	8.27106	8	0	0	-1.77414	0	-1.3117	-0.951222	-1.07521	-0.882667	-0.639108	-0.871916	0.895895	0.381783	0.0613961	0.811611	0.725442	1.26035	1.59535
17239	10516894	NM_001197082	Rcc1	Mus musculus regulator of chromosome condensation 1 (Rcc1), transcript variant 1, mRNA.	-0.955275	0.105373	0.818807	0.54407	8.44436	6	0	0	-1.77408	0	-0.936502	-0.769816	-1.04146	-1.05513	-0.924336	-1.0044	0.555572	0.626391	0.211303	0.726039	0.619567	1.08763	1.90514
18638	10531752	NM_001081107	Helq	Mus musculus helicase, POLQ-like (Helq), mRNA.	-0.955128	0.246886	0.818681	0.504966	8.21825	8	0	0	-1.77381	0	-1.13177	-1.04818	-1.23266	-1.01334	-0.627795	-0.677024	1.19862	0.00754223	0.169366	1.14595	1.05459	1.00858	1.14611
18692	10532332	NM_001163538	Pgam5	Mus musculus phosphoglycerate mutase family member 5 (Pgam5), nuclear gene encoding mitochondrial protein, transcript variant 1, mRNA.	-0.954835	0.273144	0.81843	0.494621	8.1462	9	0	0	-1.77327	0	-1.21973	-0.667932	-0.973517	-1.1486	-1.14644	-0.572798	1.25239	0.0106027	0.455059	1.03666	1.38384	0.543665	1.0468
19833	10543709	NM_178625	Tmem209	Mus musculus transmembrane protein 209 (Tmem209), mRNA.	-0.954807	0.398013	0.818406	0.418227	7.82206	10	0	0	-1.77321	0	-1.30636	-1.05672	-1.39215	-1.01363	-0.40111	-0.558856	1.05284	0.857237	0.373253	1.38797	0.43751	0.406758	1.21327
20371	10548600	BC008565	Hmgb1	Mus musculus high mobility group box 1, mRNA (cDNA clone MGC:8033 IMAGE:3586745), complete cds.	-0.954713	0.440633	0.818326	0.38139	7.69148	10	0	0	-1.77304	0	-0.56007	-0.855148	-0.619223	-0.7362	-1.69729	-1.26035	0.945768	0.544728	0.289225	0.667465	0.740779	1.09039	1.44992
30247	10344072	---	---	---	-0.954651	0.298761	0.818272	0.482801	8.07747	10	0	0	-1.77292	0	-1.16486	-0.797583	-1.30012	-0.958537	-1.05095	-0.455856	0.22932	0.843683	0.254212	1.19553	1.04834	1.52691	0.629907
18188	10526972	NM_008637	Nudt1	Mus musculus nudix (nucleoside diphosphate linked moiety X)-type motif 1 (Nudt1), mRNA.	-0.954467	0.183893	0.818115	0.529101	8.29827	7	0	0	-1.77258	0	-1.134	-1.17201	-1.03971	-0.845761	-0.785698	-0.749625	0.917055	0.236047	0.438048	1.28964	0.186878	1.47565	1.18348
26229	10601854	NM_011712	Wbp5	Mus musculus WW domain binding protein 5 (Wbp5), mRNA.	-0.954391	0.219753	0.818049	0.517839	8.23218	8	0	0	-1.77244	0	-1.24728	-1.14807	-0.811456	-1.03491	-0.716879	-0.767747	1.11198	0.285558	0.331317	0.95875	0.253492	1.352	1.43324
33991	10342679	---	---	---	-0.95429	0.23393	0.817963	0.512984	8.1998	8	0	0	-1.77225	0	-0.582867	-0.936384	-1.29661	-0.863249	-1.03635	-1.01028	0.483729	0.00833937	0.61504	0.86336	1.20726	1.591	0.957012
283	10347748	NM_028817	Acsl3	Mus musculus acyl-CoA synthetase long-chain family member 3 (Acsl3), transcript variant 1, mRNA.	-0.954029	0.378254	0.817739	0.436407	7.84142	10	0	0	-1.77177	0	-1.32406	-1.24987	-1.30003	-0.652543	-0.717142	-0.480525	0.291998	0.918697	0.515818	1.3838	0.70842	0.507671	1.39777
12674	10472820	NM_008397	Itga6	Mus musculus integrin alpha 6 (Itga6), mRNA.	-0.954022	0.23604	0.817733	0.513104	8.1815	8	0	0	-1.77176	0	-0.977081	-1.26276	-1.13596	-0.597364	-0.804485	-0.946488	0.744603	0.0570065	0.688138	0.654	1.3962	0.608963	1.57522
11747	10463140	ENSMUST00000067795	Lcor	cdna:known chromosome:NCBIM37:19:41557127:41636736:1 gene:ENSMUSG00000025019 gene_biotype:protein_coding transcript_biotype:protein_coding	-0.953952	0.374244	0.817673	0.439592	7.84881	10	0	0	-1.77162	0	-1.26875	-1.15496	-1.17582	-1.10514	-0.725916	-0.293116	1.0518	0.101445	0.529729	0.650863	1.13253	1.43554	0.821805
4354	10390075	NM_001105561	Gm11545	Mus musculus predicted gene 11545 (Gm11545), mRNA.	-0.953936	0.071147	0.81766	0.552984	8.39552	6	0	0	-1.7716	0	-0.984251	-0.864833	-0.87569	-0.980195	-1.05118	-0.967473	0.343305	0.755335	1.44791	1.00731	1.59476	0.345156	0.229843
31746	10339861	---	---	---	-0.95385	0.450571	0.817586	0.375683	7.62316	9	0	0	-1.77144	0	-1.36265	-1.09577	-1.23359	-1.05236	-0.88202	-0.0967071	0.973326	0.30195	0.490231	1.1468	1.3289	0.925293	0.556605
19624	10541799	NM_001163269	Lpar5	Mus musculus lysophosphatidic acid receptor 5 (Lpar5), transcript variant 2, mRNA.	-0.953765	0.224433	0.817513	0.518306	8.19017	8	0	0	-1.77128	0	-0.901779	-0.656306	-0.925869	-0.84854	-1.06781	-1.32229	0.254095	0.945647	0.0138395	1.3925	0.717868	1.20006	1.19858
19753	10542911	NM_010156	Samd9l	Mus musculus sterile alpha motif domain containing 9-like (Samd9l), mRNA.	-0.953636	0.196809	0.817402	0.528013	8.23215	7	0	0	-1.77104	0	-1.1105	-0.807172	-0.996982	-1.1474	-0.632961	-1.02679	0.298436	1.01304	1.45877	-0.0405156	1.27332	0.916051	0.802711
26261	10602164	NM_009031	Rbbp7	Mus musculus retinoblastoma binding protein 7 (Rbbp7), mRNA.	-0.953629	0.159651	0.817396	0.538386	8.28844	7	0	0	-1.77102	0	-1.05249	-1.11278	-1.11928	-0.75427	-0.841133	-0.841822	1.0722	-0.0204989	0.439063	1.05683	0.646554	1.6785	0.849114
24641	10586416	NM_172453	Pif1	Mus musculus PIF1 5'-to-3' DNA helicase homolog (S. cerevisiae) (Pif1), mRNA.	-0.95332	0.174939	0.817131	0.535435	8.24972	7	0	0	-1.77045	0	-0.883689	-0.830624	-0.778701	-1.02978	-0.933358	-1.26377	0.113988	0.753731	0.504352	0.96099	0.464901	1.18708	1.73488
9681	10442435	NM_009070	Rnps1	Mus musculus ribonucleic acid binding protein S1 (Rnps1), transcript variant 1, mRNA.	-0.953287	0.364978	0.817103	0.448668	7.84256	10	0	0	-1.77039	0	-1.24775	-0.447437	-0.569126	-0.967885	-1.18498	-1.30255	1.05513	0.674997	0.102052	0.893562	1.55149	0.553722	0.888768
24912	10589886	AK040958	4930520O04Rik	Mus musculus adult male aorta and vein cDNA, RIKEN full-length enriched library, clone:A530051I10 product:unclassifiable, full insert sequence.	-0.953285	0.325783	0.817101	0.473151	7.9436	10	0	0	-1.77039	0	-0.796232	-0.915559	-1.23243	-0.921738	-0.466292	-1.38746	0.586819	0.211634	0.323161	1.50437	0.837139	1.04702	1.20957
14219	10487871	ENSMUST00000103187	Cenpb	cdna:known chromosome:NCBIM37:2:131000918:131005803:-1 gene:ENSMUSG00000068267 gene_biotype:protein_coding transcript_biotype:protein_coding	-0.953279	0.226226	0.817096	0.519316	8.16121	8	0	0	-1.77038	0	-1.2217	-0.826318	-1.08169	-0.713672	-0.722091	-1.15421	0.542358	0.221366	0.594062	1.07577	1.84272	0.699421	0.743972
18891	10534551	NM_027891	Lrwd1	Mus musculus leucine-rich repeats and WD repeat domain containing 1 (Lrwd1), mRNA.	-0.95318	0.189477	0.817012	0.531762	8.21973	7	0	0	-1.77019	0	-0.90738	-0.968517	-1.00922	-0.694257	-0.870146	-1.26956	1.1093	0.318058	-0.014432	1.00807	0.586596	1.33478	1.37671
14825	10493770	NM_026374	Ilf2	Mus musculus interleukin enhancer binding factor 2 (Ilf2), mRNA.	-0.953174	0.222679	0.817007	0.520949	8.16229	8	0	0	-1.77018	0	-1.19268	-0.69913	-0.946519	-0.899153	-0.745592	-1.23597	0.890356	0.441443	0.25275	0.83057	0.602757	0.82713	1.87404
2188	10367641	NM_172308	Mthfd1l	Mus musculus methylenetetrahydrofolate dehydrogenase (NADP+ dependent) 1-like (Mthfd1l), nuclear gene encoding mitochondrial protein, transcript variant 2, mRNA.	-0.953102	0.190141	0.816945	0.531823	8.21452	7	0	0	-1.77005	0	-1.07365	-0.903312	-0.928762	-1.26667	-0.77763	-0.768585	0.746784	0.411982	0.220356	0.355501	1.12437	1.66807	1.19156
16311	10507817	NM_007559	Bmp8b	Mus musculus bone morphogenetic protein 8b (Bmp8b), mRNA.	-0.952975	0.223363	0.816836	0.52138	8.15062	8	0	0	-1.76981	0	-0.606801	-1.04246	-0.747861	-1.03365	-1.12934	-1.15774	0.887251	1.09121	0.142404	0.766153	0.388772	0.680951	1.76111
19099	10536746	NM_007480	Arf5	Mus musculus ADP-ribosylation factor 5 (Arf5), mRNA.	-0.952932	0.367456	0.816799	0.448383	7.81926	10	0	0	-1.76973	0	-0.930337	-0.797615	-0.463213	-1.03523	-0.904583	-1.58661	0.309933	1.04922	0.295421	0.9991	1.32388	0.465364	1.27467
18467	10530130	NM_145923	Rell1	Mus musculus RELT-like 1 (Rell1), mRNA.	-0.952712	0.294358	0.81661	0.492078	7.99032	9	0	0	-1.76932	0	-1.14998	-1.03184	-1.28305	-1.06286	-0.664389	-0.524145	0.991346	0.261485	0.459334	0.927897	1.61322	1.13463	0.32836
7607	10421555	NR_030459	Mir687	Mus musculus microRNA 687 (Mir687), microRNA.	-0.952677	0.281537	0.816581	0.498413	8.0174	9	0	0	-1.76926	0	-1.08659	-1.127	-1.26534	-1.02502	-0.557532	-0.654579	1.03191	-0.0160611	0.289968	1.01998	1.0402	1.42519	0.924866
22050	10563657	---	---	Mus musculus mRNA similar to RIKEN cDNA 5830413C03 gene (cDNA clone IMAGE:3156775).	-0.952585	0.436725	0.816502	0.394783	7.60922	10	0	0	-1.76909	0	-1.16385	-1.10759	-1.31966	-1.23709	-0.168619	-0.718712	1.48025	0.321447	0.470262	0.681105	0.703017	1.09081	0.968619
8566	10431393	NM_013871	Mapk12	Mus musculus mitogen-activated protein kinase 12 (Mapk12), mRNA.	-0.952559	0.148781	0.816479	0.544464	8.24478	7	0	0	-1.76904	0	-0.96022	-1.01731	-1.10136	-0.702624	-0.863464	-1.07037	1.64616	0.767821	0.38399	1.04856	1.3141	0.37242	0.182301
19554	10541112	---	---	cdna:pseudogene chromosome:NCBIM37:6:117947225:117948010:1 gene:ENSMUSG00000082791 gene_biotype:pseudogene transcript_biotype:transcribed_processed_pseudogene	-0.952407	0.265266	0.816349	0.506741	8.03884	9	0	0	-1.76876	0	-0.749492	-1.05144	-1.25152	-1.08141	-0.523668	-1.05692	0.392296	1.70692	0.0985263	0.85201	0.963608	0.967198	0.733882
4347	10389990	NM_027984	Epn3	Mus musculus epsin 3 (Epn3), mRNA.	-0.952401	0.42434	0.816343	0.406686	7.63708	10	0	0	-1.76874	0	-1.3303	-1.29497	-1.12572	-0.963623	-0.816495	-0.183296	0.689858	0.66193	0.227559	1.18073	0.603716	1.46698	0.883626
8806	10434148	NM_001081000	Trmt2a	Mus musculus TRM2 tRNA methyltransferase 2 homolog A (S. cerevisiae) (Trmt2a), transcript variant 1, mRNA.	-0.952335	0.33772	0.816287	0.469718	7.86806	10	0	0	-1.76862	0	-1.45131	-0.503212	-1.02075	-0.712579	-0.854899	-1.17126	0.958868	0.404951	0.355708	0.366522	1.25001	1.54531	0.832639
766	10352815	NM_016851	Irf6	Mus musculus interferon regulatory factor 6 (Irf6), mRNA.	-0.952188	0.426446	0.816161	0.405775	7.62168	10	0	0	-1.76835	0	-1.30203	-1.30241	-1.34616	-0.836609	-0.555109	-0.370813	0.432307	0.386158	0.374957	1.11101	0.927666	1.26786	1.21316
4313	10389627	ENSMUST00000067692	Rad51c	cdna:known chromosome:NCBIM37:11:87190147:87218025:-1 gene:ENSMUSG00000007646 gene_biotype:protein_coding transcript_biotype:protein_coding	-0.952028	0.280113	0.816024	0.501376	7.9882	9	0	0	-1.76805	0	-1.28075	-0.708532	-1.32291	-0.86061	-0.848916	-0.690448	0.342592	0.629865	0.432428	1.39993	0.321434	1.46878	1.11714
23397	10574456	AF401531	Cklf	Mus musculus chemokine-like factor 5 (CKLF5) mRNA, complete cds.	-0.951968	0.268992	0.815972	0.506637	8.00899	9	0	0	-1.76794	0	-1.061	-1.06426	-1.10898	-1.24597	-0.606435	-0.625162	0.324538	0.253435	0.434674	1.62486	1.00889	0.872577	1.19284
14169	10487252	ENSMUST00000103227	Gabpb1	cdna:known chromosome:NCBIM37:2:126454651:126501280:-1 gene:ENSMUSG00000027361 gene_biotype:protein_coding transcript_biotype:protein_coding	-0.951951	0.29599	0.815958	0.493992	7.94915	9	0	0	-1.76791	0	-1.22516	-1.07484	-1.1431	-1.11843	-0.576578	-0.573602	0.629007	0.136627	0.193859	1.06003	1.23915	1.17681	1.27621
19772	10543080	NM_009070	Rnps1	Mus musculus ribonucleic acid binding protein S1 (Rnps1), transcript variant 1, mRNA.	-0.951757	0.356531	0.815791	0.460213	7.79311	10	0	0	-1.76755	0	-1.2364	-0.442623	-0.664937	-0.974688	-0.979979	-1.41192	1.04454	0.688529	0.0143719	1.00607	1.45249	0.517407	0.987129
11174	10457640	NM_016740	S100a11	Mus musculus S100 calcium binding protein A11 (calgizzarin) (S100a11), mRNA.	-0.951487	0.322237	0.81556	0.481817	7.86559	10	0	0	-1.76705	0	-1.10247	-1.2204	-1.06767	-1.21932	-0.460917	-0.638146	0.989139	0.670799	0.339789	0.937254	1.24526	0.0886043	1.43808
17395	10518372	NM_001025365	Miip	Mus musculus migration and invasion inhibitory protein (Miip), mRNA.	-0.951477	0.443704	0.815551	0.393259	7.54112	10	0	0	-1.76703	0	-0.758181	-1.13633	-0.367913	-0.5998	-1.46419	-1.38245	1.19188	0.714921	0.475304	0.748539	0.308272	0.823112	1.44684
25162	10592289	NM_001081429	Ccdc15	Mus musculus coiled-coil domain containing 15 (Ccdc15), mRNA.	-0.951319	0.252673	0.815416	0.515818	8.00993	8	0	0	-1.76674	0	-1.37021	-1.0259	-1.03371	-0.877037	-0.707392	-0.69367	0.822627	0.180363	0.326348	1.07419	0.747838	1.75465	0.801894
22316	10565018	NM_016721	Iqgap1	Mus musculus IQ motif containing GTPase activating protein 1 (Iqgap1), mRNA.	-0.951286	0.255864	0.815388	0.51462	8.00191	9	0	0	-1.76667	0	-1.30725	-1.0034	-1.00754	-0.625254	-0.683536	-1.08073	1.0097	0.25372	0.410212	0.455946	1.77764	0.932481	0.868014
19188	10537722	NM_175408	Tmem139	Mus musculus transmembrane protein 139 (Tmem139), mRNA.	-0.95117	0.260539	0.815289	0.513059	7.98676	9	0	0	-1.76646	0	-1.1896	-0.90007	-1.27571	-0.583638	-0.75834	-0.999658	0.0722682	1.22595	0.420795	1.52673	0.464016	0.942686	1.05458
14774	10493259	ENSMUST00000035785	Ssr2	cdna:known chromosome:NCBIM37:3:88383593:88392319:1 gene:ENSMUSG00000041355 gene_biotype:protein_coding transcript_biotype:protein_coding	-0.951112	0.244634	0.815239	0.51974	8.01528	8	0	0	-1.76635	0	-0.946235	-0.770091	-1.00799	-0.929755	-0.67173	-1.38087	0.776326	0.356326	0.76698	0.327112	1.36441	0.44586	1.66966
16390	10508697	NM_020587	Srsf4	Mus musculus serine/arginine-rich splicing factor 4 (Srsf4), mRNA.	-0.950953	0.220101	0.815102	0.529334	8.05236	8	0	0	-1.76606	0	-1.31841	-0.72159	-0.879667	-0.948398	-0.764814	-1.07284	0.917895	0.390647	0.407315	0.56103	0.54036	1.00124	1.88723
21333	10556790	NM_028129	2610020H08Rik	Mus musculus RIKEN cDNA 2610020H08 gene (2610020H08Rik), transcript variant 2, mRNA.	-0.950953	0.298855	0.815102	0.496122	7.89424	10	0	0	-1.76605	0	-1.1277	-1.10702	-1.32507	-0.952175	-0.60827	-0.585474	0.485754	0.35536	0.243031	1.18286	0.656247	1.44318	1.33928
13060	10476033	NM_183262	Stk35	Mus musculus serine/threonine kinase 35 (Stk35), transcript variant 1, mRNA.	-0.950903	0.327742	0.81506	0.480861	7.82481	10	0	0	-1.76596	0	-1.16682	-1.21787	-1.24901	-0.802738	-0.867016	-0.401971	0.220867	0.517257	0.232534	1.14328	1.39561	1.07079	1.12509
8133	10427214	NM_013672	Sp1	Mus musculus trans-acting transcription factor 1 (Sp1), mRNA.	-0.950741	0.316635	0.814921	0.48761	7.84345	10	0	0	-1.76566	0	-1.29009	-1.17285	-1.06813	-0.890445	-0.388404	-0.894531	0.801276	0.0478844	0.543509	0.627814	1.50012	1.3226	0.861249
17729	10522160	NM_001024917	N4bp2	Mus musculus NEDD4 binding protein 2 (N4bp2), mRNA.	-0.950678	0.242399	0.814867	0.522084	7.99785	8	0	0	-1.76554	0	-1.12281	-1.1233	-1.11734	-1.06087	-0.614972	-0.664773	1.04076	0.679662	-0.0264284	0.850705	0.417974	1.57274	1.16866
28002	10490815	---	---	---	-0.950648	0.184447	0.814841	0.541564	8.09475	7	0	0	-1.76549	0	-1.2232	-0.999448	-0.878176	-0.661334	-0.928052	-1.01368	0.848154	1.35568	0.332787	1.66028	0.206847	0.432089	0.868045
28152	10513156	---	---	---	-0.950647	0.161124	0.814841	0.547731	8.12758	7	0	0	-1.76549	0	-0.939707	-0.860324	-0.865406	-1.18531	-0.756223	-1.09692	0.313642	1.44243	-0.0646821	0.619517	1.15938	0.971526	1.26207
8895	10435094	NM_016788	Tnk2	Mus musculus tyrosine kinase, non-receptor, 2 (Tnk2), transcript variant 1, mRNA.	-0.950622	0.41435	0.814819	0.422686	7.58758	10	0	0	-1.76544	0	-1.39215	-1.2665	-1.0855	-1.07342	-0.530392	-0.355777	0.568916	0.773546	0.164629	0.974692	0.608537	1.43908	1.17433
9997	10445702	NM_198421	Usp49	Mus musculus ubiquitin specific peptidase 49 (Usp49), mRNA.	-0.950598	0.26189	0.814798	0.514454	7.95578	9	0	0	-1.7654	0	-1.11484	-1.19583	-1.11242	-0.999044	-0.507986	-0.773464	0.517027	0.995447	0.161578	0.504683	0.570973	1.53816	1.41571
6493	10410576	NM_028959	Cep72	Mus musculus centrosomal protein 72 (Cep72), mRNA.	-0.950586	0.461444	0.814788	0.380025	7.4521	9	0	0	-1.76537	0	-1.16757	-1.0471	-1.48137	-1.23749	-0.337932	-0.43206	0.731647	0.54881	0.309456	1.17563	0.536543	1.31902	1.08241
15578	10500837	NM_133865	Dclre1b	Mus musculus DNA cross-link repair 1B, PSO2 homolog (S. cerevisiae) (Dclre1b), transcript variant 1, mRNA.	-0.95043	0.376432	0.814654	0.452024	7.68109	10	0	0	-1.76508	0	-1.17853	-1.06334	-1.2967	-1.19556	-0.363715	-0.604739	0.787843	0.270886	0.20657	0.757907	1.1154	1.16092	1.40306
14910	10494413	NR_004412	Rnu1b1	Mus musculus U1b1 small nuclear RNA (Rnu1b1), small nuclear RNA.	-0.950017	0.283613	0.8143	0.506792	7.88261	9	0	0	-1.76432	0	-0.733795	-0.85947	-0.867179	-0.909284	-1.51598	-0.814392	0.350207	1.03137	0.409773	0.67825	0.464139	0.97913	1.78723
14914	10494421	NR_004412	Rnu1b1	Mus musculus U1b1 small nuclear RNA (Rnu1b1), small nuclear RNA.	-0.950017	0.283613	0.8143	0.506792	7.88261	9	0	0	-1.76432	0	-0.733795	-0.85947	-0.867179	-0.909284	-1.51598	-0.814392	0.350207	1.03137	0.409773	0.67825	0.464139	0.97913	1.78723
15527	10500343	NR_004412	Rnu1b1	Mus musculus U1b1 small nuclear RNA (Rnu1b1), small nuclear RNA.	-0.950017	0.283613	0.8143	0.506792	7.88261	9	0	0	-1.76432	0	-0.733795	-0.85947	-0.867179	-0.909284	-1.51598	-0.814392	0.350207	1.03137	0.409773	0.67825	0.464139	0.97913	1.78723
15530	10500358	NR_004412	Rnu1b1	Mus musculus U1b1 small nuclear RNA (Rnu1b1), small nuclear RNA.	-0.950017	0.283613	0.8143	0.506792	7.88261	9	0	0	-1.76432	0	-0.733795	-0.85947	-0.867179	-0.909284	-1.51598	-0.814392	0.350207	1.03137	0.409773	0.67825	0.464139	0.97913	1.78723
16815	10512937	NR_004412	Rnu1b1	Mus musculus U1b1 small nuclear RNA (Rnu1b1), small nuclear RNA.	-0.950017	0.283613	0.8143	0.506792	7.88261	9	0	0	-1.76432	0	-0.733795	-0.85947	-0.867179	-0.909284	-1.51598	-0.814392	0.350207	1.03137	0.409773	0.67825	0.464139	0.97913	1.78723
12398	10469849	NM_026021	Zmynd19	Mus musculus zinc finger, MYND domain containing 19 (Zmynd19), mRNA.	-0.949821	0.272901	0.814133	0.512344	7.89559	9	0	0	-1.76395	0	-1.36835	-0.830927	-1.2067	-0.858151	-0.735203	-0.699588	0.9107	0.419837	0.0809944	0.504001	1.05714	1.12368	1.60257
969	10355069	ENSMUST00000172416	Ino80d	cdna:known chromosome:NCBIM37:1:63094375:63160841:-1 gene:ENSMUSG00000040865 gene_biotype:protein_coding transcript_biotype:protein_coding	-0.949566	0.415278	0.813914	0.426315	7.53967	10	0	0	-1.76348	0	-1.24088	-0.880082	-1.02017	-1.4928	-0.780063	-0.283406	0.58609	0.600194	0.506424	0.586962	1.35997	1.50649	0.551265
16159	10506154	NM_001081264	Alg6	Mus musculus asparagine-linked glycosylation 6 (alpha-1,3,-glucosyltransferase) (Alg6), mRNA.	-0.949421	0.326948	0.813789	0.486716	7.75777	10	0	0	-1.76321	0	-0.957077	-1.25754	-1.26382	-1.0646	-0.419277	-0.734211	0.579327	0.0456673	0.665283	1.26344	0.603808	1.48478	1.05422
15193	10497399	ENSMUST00000099195	Pde7a	cdna:known chromosome:NCBIM37:3:19123108:19211322:-1 gene:ENSMUSG00000069094 gene_biotype:protein_coding transcript_biotype:protein_coding	-0.949362	0.379139	0.813739	0.4543	7.6267	10	0	0	-1.7631	0	-1.32968	-1.0997	-1.28925	-1.00848	-0.47141	-0.497662	0.77372	0.172705	0.528427	0.909539	1.02185	0.658919	1.63102
22338	10565288	NM_133722	Fam108c	Mus musculus family with sequence similarity 108, member C (Fam108c), mRNA.	-0.949294	0.544529	0.813681	0.281647	7.1527	7	0	0	-1.76297	0	-1.46823	-1.54325	-1.21985	-0.801312	-0.298382	-0.364743	0.49807	0.579875	0.62848	0.980162	0.916986	1.31157	0.780623
11061	10456383	NM_053261	Impa2	Mus musculus inositol (myo)-1(or 4)-monophosphatase 2 (Impa2), mRNA.	-0.949057	0.197935	0.813477	0.542777	7.99366	7	0	0	-1.76253	0	-0.632114	-0.897275	-1.08242	-0.984921	-0.884812	-1.2128	0.794768	0.414261	0.190626	1.51121	0.6237	0.55302	1.60676
725	10352348	NM_030131	Cnih4	Mus musculus cornichon homolog 4 (Drosophila) (Cnih4), mRNA.	-0.949035	0.37332	0.813459	0.459555	7.6272	10	0	0	-1.76249	0	-1.39688	-1.34973	-0.941613	-0.831489	-0.41393	-0.760578	0.436607	0.258106	1.29013	1.24686	0.892482	0.341283	1.22874
25990	10599893	NM_008031	Fmr1	Mus musculus fragile X mental retardation syndrome 1 (Fmr1), mRNA.	-0.948863	0.317688	0.813311	0.493796	7.75345	10	0	0	-1.76217	0	-1.22182	-1.10935	-1.14778	-1.12075	-0.469787	-0.623686	1.39034	0.0372868	0.353855	0.976101	0.61222	1.10227	1.2211
1912	10364856	NM_199322	Dot1l	Mus musculus DOT1-like, histone H3 methyltransferase (S. cerevisiae) (Dot1l), mRNA.	-0.948793	0.308647	0.813251	0.498798	7.77053	10	0	0	-1.76204	0	-1.22688	-0.831259	-1.21966	-1.08622	-0.408318	-0.920426	0.291307	0.281199	0.490474	0.96507	0.775866	1.36725	1.52159
7478	10420071	ENSMUST00000002391	Tm9sf1	cdna:known chromosome:NCBIM37:14:56254897:56262177:-1 gene:ENSMUSG00000002320 gene_biotype:protein_coding transcript_biotype:protein_coding	-0.948757	0.30039	0.81322	0.503106	7.78703	9	0	0	-1.76198	0	-1.12566	-0.87642	-1.14161	-0.877442	-0.41929	-1.25213	0.104697	0.6292	0.690869	0.890256	1.7502	0.60874	1.01858
11833	10464045	NM_027976	Acsl5	Mus musculus acyl-CoA synthetase long-chain family member 5 (Acsl5), mRNA.	-0.948752	0.250363	0.813216	0.525448	7.8885	8	0	0	-1.76197	0	-1.18639	-1.04705	-1.10273	-1.01712	-0.492066	-0.847143	0.00930223	0.807514	0.275902	1.0756	0.758734	1.40574	1.35972
4463	10391052	NM_016958	Krt14	Mus musculus keratin 14 (Krt14), mRNA.	-0.948636	0.348261	0.813116	0.477145	7.67153	10	0	0	-1.76175	0	-1.168	-1.30966	-1.18309	-0.838005	-0.359034	-0.834032	0.56097	0.749717	0.602012	0.528993	0.544234	0.844027	1.86186
25755	10598164	NM_027861	Brox	Mus musculus BRO1 domain and CAAX motif containing (Brox), mRNA.	-0.948505	0.342788	0.813004	0.480917	7.67878	10	0	0	-1.76151	0	-1.04464	-1.09408	-1.01119	-1.32952	-0.311619	-0.899971	1.58079	0.186467	0.449973	0.69589	1.29407	0.838376	0.645462
16475	10509601	NM_029857	Tmco4	Mus musculus transmembrane and coiled-coil domains 4 (Tmco4), mRNA.	-0.948492	0.189751	0.812993	0.547028	7.978	7	0	0	-1.76149	0	-1.16027	-0.944455	-1.06733	-1.01937	-0.885844	-0.61369	0.789293	0.725794	0.038351	1.36407	0.409739	0.708151	1.65556
14444	10489985	ENSMUST00000109176	Atp9a	cdna:novel chromosome:NCBIM37:2:168459938:168567462:-1 gene:ENSMUSG00000027546 gene_biotype:protein_coding transcript_biotype:protein_coding	-0.948462	0.294526	0.812968	0.507013	7.78595	9	0	0	-1.76143	0	-0.763139	-0.822498	-1.04336	-0.74899	-0.804081	-1.50871	1.0549	1.19217	0.231621	0.817892	0.0663485	1.47879	0.849049
8454	10430265	NM_018749	Eif3d	Mus musculus eukaryotic translation initiation factor 3, subunit D (Eif3d), mRNA.	-0.948424	0.367086	0.812935	0.466037	7.61602	10	0	0	-1.76136	0	-1.18873	-0.524124	-0.641087	-0.839291	-0.975401	-1.52191	0.31382	0.803392	0.619946	0.392739	1.58961	1.28329	0.687747
3190	10377859	NM_008876	Pld2	Mus musculus phospholipase D2 (Pld2), mRNA.	-0.948304	0.444829	0.812832	0.40622	7.40572	10	0	0	-1.76114	0	-1.45073	-0.887991	-1.50106	-0.849486	-0.591164	-0.409383	0.775068	0.118938	0.451421	1.13182	1.17686	1.18846	0.847249
10716	10452701	NM_028887	Smchd1	Mus musculus SMC hinge domain containing 1 (Smchd1), mRNA.	-0.948269	0.146195	0.812802	0.558767	8.02437	6	0	0	-1.76107	0	-1.13145	-0.9873	-0.874181	-1.01035	-0.985214	-0.701125	0.764384	0.0582069	0.204669	0.951364	0.763269	1.60818	1.33954
8507	10430748	NM_011241	Rangap1	Mus musculus RAN GTPase activating protein 1 (Rangap1), transcript variant 1, mRNA.	-0.948141	0.129051	0.812693	0.562674	8.03668	6	0	0	-1.76083	0	-1.13145	-0.973357	-1.05781	-0.88584	-0.834083	-0.806309	0.171671	0.807276	0.0792566	1.02652	0.659501	1.39692	1.5477
19544	10541067	NM_138669	Eif4a3	Mus musculus eukaryotic translation initiation factor 4A3 (Eif4a3), mRNA.	-0.94814	0.277792	0.812692	0.515923	7.80577	9	0	0	-1.76083	0	-1.13094	-0.814229	-1.10857	-0.862158	-0.503225	-1.26972	0.525399	0.509599	0.0673068	0.605877	1.46079	1.30577	1.2141
17662	10521459	NM_175249	Psapl1	Mus musculus prosaposin-like 1 (Psapl1), mRNA.	-0.948132	0.174033	0.812685	0.552516	7.98242	7	0	0	-1.76082	0	-0.947997	-1.01071	-0.89598	-1.20497	-0.96147	-0.66767	0.364401	0.114983	0.571819	1.82532	0.886427	1.03321	0.892636
18476	10530225	NM_001081321	Pds5a	Mus musculus PDS5, regulator of cohesion maintenance, homolog A (S. cerevisiae) (Pds5a), mRNA.	-0.947856	0.343105	0.812448	0.4831	7.64909	10	0	0	-1.7603	0	-1.17296	-1.27126	-1.20139	-0.979819	-0.4302	-0.631509	0.794996	0.25138	0.359972	0.75818	0.613607	1.53676	1.37224
3466	10380751	NM_025927	Mrpl45	Mus musculus mitochondrial ribosomal protein L45 (Mrpl45), nuclear gene encoding mitochondrial protein, mRNA.	-0.947853	0.200622	0.812446	0.545852	7.93015	7	0	0	-1.7603	0	-0.980808	-0.657943	-1.2427	-1.04488	-0.953423	-0.807372	0.195041	0.291596	0.449865	0.725373	1.09801	1.64612	1.28111
18540	10530892	NM_007683	Cenpc1	Mus musculus centromere protein C1 (Cenpc1), mRNA.	-0.94784	0.302323	0.812434	0.505347	7.74053	9	0	0	-1.76027	0	-1.14416	-1.03602	-1.16415	-1.21265	-0.583603	-0.546468	0.781896	0.14638	0.225547	0.912934	0.788369	1.37071	1.4612
7528	10420572	NM_170591	Nupl1	Mus musculus nucleoporin like 1 (Nupl1), mRNA.	-0.947547	0.556489	0.812183	0.27296	7.05263	7	0	0	-1.75973	0	-1.23932	-1.39121	-1.27563	-1.31457	-0.211398	-0.253159	0.86681	1.05127	0.284524	0.971342	0.962472	0.604573	0.944285
8746	10433494	NM_011955	Nubp1	Mus musculus nucleotide binding protein 1 (Nubp1), mRNA.	-0.94705	0.182965	0.811757	0.553558	7.91689	7	0	0	-1.75881	0	-0.900143	-0.906815	-0.877652	-1.00552	-0.72175	-1.27042	0.278947	1.28377	0.364402	0.922687	1.48656	1.23223	0.1137
7282	10418096	NM_001163513	Dlg5	Mus musculus discs, large homolog 5 (Drosophila) (Dlg5), transcript variant 1, mRNA.	-0.946541	0.493863	0.81132	0.364504	7.19864	9	0	0	-1.75786	0	-1.63079	-1.19661	-0.858348	-1.20645	-0.423392	-0.363656	0.654787	1.24242	0.681226	0.719339	1.37965	0.349683	0.652141
790	10353032	---	---	cdna:known chromosome:NCBIM37:1:9792275:9792634:-1 gene:ENSMUSG00000046334 gene_biotype:pseudogene transcript_biotype:retrotransposed	-0.946518	0.246433	0.811301	0.534402	7.7899	8	0	0	-1.75782	0	-0.534889	-0.988752	-1.27055	-0.947657	-0.853629	-1.08363	0.534213	0.856355	0.330242	0.826548	0.227512	1.10502	1.79922
16145	10506004	ENSMUST00000030306	Hook1	cdna:known chromosome:NCBIM37:4:95633931:95692104:1 gene:ENSMUSG00000028572 gene_biotype:protein_coding transcript_biotype:protein_coding	-0.945845	0.41277	0.810724	0.443368	7.39134	10	0	0	-1.75657	0	-1.14795	-1.24694	-1.34736	-1.07899	-0.464912	-0.388929	1.01878	0.0679913	0.359001	1.1024	0.766411	1.07942	1.28107
8692	10432972	NM_011244	Rarg	Mus musculus retinoic acid receptor, gamma (Rarg), transcript variant 1, mRNA.	-0.945827	0.38156	0.810709	0.46615	7.46908	10	0	0	-1.75654	0	-1.24033	-1.51234	-0.995426	-0.807106	-0.541717	-0.578045	0.38763	0.708932	0.0962019	1.25	0.714861	1.27285	1.24449
21886	10562005	NM_029274	Wbp7	Mus musculus WW domain binding protein 7 (Wbp7), mRNA.	-0.945738	0.471102	0.810633	0.39241	7.23163	9	0	0	-1.75637	0	-1.34316	-1.28644	-1.13762	-1.21871	-0.363631	-0.324866	0.719639	0.577021	0.379215	1.07386	0.39404	1.16886	1.36179
26934	10607475	NM_016764	Prdx4	Mus musculus peroxiredoxin 4 (Prdx4), mRNA.	-0.945704	0.416551	0.810603	0.440973	7.37588	10	0	0	-1.75631	0	-0.958145	-0.587196	-1.17868	-0.721515	-0.576999	-1.65169	1.32489	0.0820825	0.52303	0.595568	1.14038	0.832516	1.17576
8126	10427131	NM_146064	Soat2	Mus musculus sterol O-acyltransferase 2 (Soat2), mRNA.	-0.945472	0.384894	0.810405	0.465205	7.44611	10	0	0	-1.75588	0	-0.642359	-1.03086	-0.77344	-0.577968	-1.01574	-1.63246	1.28571	0.358971	0.359446	1.11134	1.40106	0.335151	0.821149
21514	10558795	NM_019762	Pkp3	Mus musculus plakophilin 3 (Pkp3), transcript variant 1, mRNA.	-0.945454	0.144653	0.810389	0.567885	7.88731	6	0	0	-1.75584	0	-0.996927	-0.873414	-0.751588	-0.875451	-1.00446	-1.17088	0.0470879	0.397864	0.489639	0.748349	1.0596	1.74442	1.18577
25439	10595000	NM_016963	Tmod3	Mus musculus tropomodulin 3 (Tmod3), mRNA.	-0.94523	0.373867	0.810197	0.473539	7.46279	10	0	0	-1.75543	0	-1.38864	-1.13588	-0.797729	-1.23278	-0.382319	-0.734023	1.21265	0.255302	0.0281015	1.15151	0.925554	0.949369	1.14889
18398	10529330	ENSMUST00000030993	Whsc2	cdna:known chromosome:NCBIM37:5:34239585:34279062:-1 gene:ENSMUSG00000029111 gene_biotype:protein_coding transcript_biotype:protein_coding	-0.945107	0.329173	0.810092	0.500852	7.56051	10	0	0	-1.7552	0	-1.22484	-0.948096	-1.32379	-0.8226	-0.392906	-0.958406	0.611014	0.797522	0.534997	0.709181	0.0903563	1.52214	1.40543
513	10350297	NM_001081258	Kif14	Mus musculus kinesin family member 14 (Kif14), mRNA.	-0.944848	0.150029	0.80987	0.568596	7.85225	6	0	0	-1.75472	0	-0.837735	-0.792462	-0.856756	-0.983515	-1.20148	-0.997141	0.101185	1.08788	0.431419	1.14316	0.144288	1.30453	1.45662
14744	10492890	NM_030695	Lrba	Mus musculus LPS-responsive beige-like anchor (Lrba), transcript variant 1, mRNA.	-0.944807	0.395258	0.809835	0.460446	7.39327	10	0	0	-1.75464	0	-1.27678	-1.08239	-1.24324	-1.17655	-0.375944	-0.513946	0.558212	0.384526	0.162504	0.92609	0.952915	1.27985	1.40475
7432	10419611	NM_033618	Supt16h	Mus musculus suppressor of Ty 16 homolog (S. cerevisiae) (Supt16h), mRNA.	-0.944771	0.348285	0.809804	0.491165	7.50337	10	0	0	-1.75457	0	-1.30583	-0.872326	-0.986088	-1.27067	-0.34489	-0.888831	0.693826	0.698046	0.134704	0.581562	0.633201	1.34646	1.58083
2070	10366554	NM_001162904	Mdm1	Mus musculus transformed mouse 3T3 cell double minute 1 (Mdm1), transcript variant 3, mRNA.	-0.944733	0.171991	0.809771	0.563748	7.82047	7	0	0	-1.7545	0	-0.970128	-0.812685	-1.1548	-0.687311	-1.08326	-0.960215	0.24203	1.39286	0.177402	1.15506	0.25228	1.03619	1.41257
17903	10523845	NM_001001804	Ephx4	Mus musculus epoxide hydrolase 4 (Ephx4), mRNA.	-0.944731	0.209014	0.80977	0.55323	7.76872	7	0	0	-1.7545	0	-0.917496	-0.959949	-0.824524	-0.991242	-0.673601	-1.30157	-0.0391516	0.385007	0.565498	1.38423	1.52243	0.999648	0.850727
6479	10410435	NM_198600	Papd7	Mus musculus PAP associated domain containing 7 (Papd7), transcript variant 1, mRNA.	-0.944697	0.372138	0.80974	0.476639	7.44475	10	0	0	-1.75444	0	-1.51522	-0.8726	-1.16551	-1.0109	-0.560291	-0.543661	0.63027	0.313781	0.512496	0.725069	1.2615	0.56392	1.66114
10917	10454912	NM_175375	Ankhd1	Mus musculus ankyrin repeat and KH domain containing 1 (Ankhd1), mRNA.	-0.944581	0.388996	0.80964	0.465724	7.3994	10	0	0	-1.75422	0	-1.47101	-1.1073	-1.15409	-0.92886	-0.600727	-0.405498	0.406099	0.296449	0.392634	1.21755	0.710767	1.31453	1.32946
15212	10497590	ENSMUST00000108271	Mecom	cdna:putative chromosome:NCBIM37:3:29850229:30039345:-1 gene:ENSMUSG00000027684 gene_biotype:protein_coding transcript_biotype:protein_coding	-0.944552	0.463698	0.809616	0.404867	7.20637	10	0	0	-1.75417	0	-1.33603	-1.31063	-1.25458	-0.926472	-0.684966	-0.154628	0.653871	0.722044	0.0853497	1.10804	0.684459	1.2652	1.14834
9601	10441864	NM_010806	Mllt4	Mus musculus myeloid/lymphoid or mixed-lineage leukemia (trithorax homolog, Drosophila); translocated to, 4 (Mllt4), mRNA.	-0.944304	0.361554	0.809404	0.4848	7.4533	10	0	0	-1.75371	0	-1.35326	-1.16947	-1.14162	-0.966388	-0.391058	-0.644036	0.928776	0.593546	0.0330045	0.550315	0.781127	1.44211	1.33695
23338	10574023	NM_008630	Mt2	Mus musculus metallothionein 2 (Mt2), mRNA.	-0.944206	0.497134	0.80932	0.371966	7.10239	9	0	0	-1.75353	0	-0.808448	-0.357811	-1.08538	-0.681312	-1.82892	-0.90337	0.470723	1.06193	0.635427	0.641893	1.52926	0.535936	0.790069
11451	10460376	NM_031868	Ppp1ca	Mus musculus protein phosphatase 1, catalytic subunit, alpha isoform (Ppp1ca), mRNA.	-0.944044	0.36623	0.809181	0.482814	7.43163	10	0	0	-1.75322	0	-0.713585	-0.832924	-1.21619	-1.0922	-0.401666	-1.4077	0.834178	0.681486	0.027573	1.45826	0.98442	1.23729	0.441052
28357	10547088	---	---	---	-0.944007	0.119833	0.809149	0.577097	7.84266	6	0	0	-1.75316	0	-0.907671	-0.88708	-0.752431	-0.991031	-1.06776	-1.05807	0.226406	0.735203	0.0531073	1.54787	0.527566	1.28421	1.28969
24088	10581674	NM_133953	Sf3b3	Mus musculus splicing factor 3b, subunit 3 (Sf3b3), mRNA.	-0.943997	0.148759	0.809141	0.571491	7.81332	6	0	0	-1.75314	0	-1.10262	-0.841403	-0.814096	-0.932261	-0.822055	-1.15155	0.447116	0.511229	-0.0193044	0.630165	1.22007	1.25948	1.61522
26963	10607747	NM_009173	Siah1b	Mus musculus seven in absentia 1B (Siah1b), mRNA.	-0.943914	0.16509	0.809069	0.568	7.79053	7	0	0	-1.75298	0	-0.851553	-1.05713	-1.13117	-0.817747	-0.728894	-1.07699	0.697954	0.0183425	0.199837	0.910415	0.92438	1.27509	1.63746
16841	10513162	NM_011207	Ptpn3	Mus musculus protein tyrosine phosphatase, non-receptor type 3 (Ptpn3), mRNA.	-0.943847	0.465938	0.809012	0.405776	7.17367	10	0	0	-1.75286	0	-1.25371	-1.24906	-1.06905	-1.3724	-0.276062	-0.442797	0.74891	1.22529	0.134906	1.08233	0.953571	0.401261	1.11681
29909	10342430	---	---	---	-0.943686	0.258708	0.808874	0.53885	7.63899	8	0	0	-1.75256	0	-1.09702	-1.35014	-0.99429	-0.752961	-0.636539	-0.83117	0.68632	0.380148	-0.0378874	1.48838	0.705237	1.13086	1.30906
11492	10460746	ENSMUST00000044451	Naaladl1	cdna:known chromosome:NCBIM37:19:6105782:6115792:1 gene:ENSMUSG00000054999 gene_biotype:protein_coding transcript_biotype:protein_coding	-0.943663	0.284059	0.808854	0.528177	7.5909	9	0	0	-1.75252	0	-0.697975	-0.945574	-0.830994	-0.668404	-1.42549	-1.09355	0.37716	0.338333	0.75227	0.434497	0.662971	1.48644	1.61031
21161	10555620	NM_011644	Trpc2	Mus musculus transient receptor potential cation channel, subfamily C, member 2 (Trpc2), transcript variant 1, mRNA.	-0.943486	0.0878859	0.808702	0.583436	7.84265	6	0	0	-1.75219	0	-1.07424	-0.953069	-0.823956	-0.946694	-0.989988	-0.872974	0.64982	0.644413	0.0360142	1.27476	0.287826	1.73229	1.0358
12159	10467368	NM_212450	Ctdspl2	Mus musculus CTD (carboxy-terminal domain, RNA polymerase II, polypeptide A) small phosphatase like 2 (Ctdspl2), mRNA.	-0.943423	0.161863	0.808648	0.570282	7.77151	7	0	0	-1.75207	0	-0.986365	-1.08258	-0.893474	-1.08148	-0.647492	-0.969154	1.54988	0.0765676	0.17015	0.608199	0.730758	1.26905	1.25593
21924	10562331	NM_016682	Uba2	Mus musculus ubiquitin-like modifier activating enzyme 2 (Uba2), mRNA.	-0.943417	0.28964	0.808643	0.526466	7.56937	9	0	0	-1.75206	0	-1.23484	-1.04317	-1.0695	-0.887927	-0.397105	-1.02797	0.993167	0.270826	0.248404	0.32948	0.96226	1.37829	1.47807
7103	10416375	NM_026119	Med4	Mus musculus mediator of RNA polymerase II transcription, subunit 4 homolog (yeast) (Med4), mRNA.	-0.943382	0.26171	0.808613	0.538631	7.62014	8	0	0	-1.75199	0	-1.33135	-0.903864	-0.835228	-0.667019	-1.18686	-0.735967	1.20957	0.0914877	-0.013569	1.05187	0.906102	1.16894	1.24589
16843	10513166	NM_011207	Ptpn3	Mus musculus protein tyrosine phosphatase, non-receptor type 3 (Ptpn3), mRNA.	-0.943343	0.405905	0.80858	0.458297	7.30824	10	0	0	-1.75192	0	-1.16647	-1.25087	-0.976347	-1.35221	-0.318741	-0.595423	0.517317	1.08879	0.086602	1.06799	0.986008	0.491391	1.42196
17267	10517141	NM_016957	Hmgn2	Mus musculus high mobility group nucleosomal binding domain 2 (Hmgn2), mRNA.	-0.943254	0.349035	0.808504	0.496111	7.43814	10	0	0	-1.75176	0	-0.892175	-0.569653	-0.880208	-0.608541	-1.2747	-1.43424	0.308467	1.37888	0.376665	0.24085	0.86767	1.17023	1.31676
12235	10468329	NM_175360	Obfc1	Mus musculus oligonucleotide/oligosaccharide-binding fold containing 1 (Obfc1), mRNA.	-0.943195	0.153031	0.808453	0.573008	7.77103	6	0	0	-1.75165	0	-1.06709	-0.896599	-0.963624	-0.857913	-0.722726	-1.15122	0.406987	0.550685	0.104741	1.34404	0.778052	1.78118	0.693482
19373	10539220	NM_177884	AW146020	Mus musculus expressed sequence AW146020 (AW146020), mRNA.	-0.943164	0.360243	0.808426	0.489713	7.40917	10	0	0	-1.75159	0	-0.991239	-1.3148	-1.19582	-1.1182	-0.353736	-0.685188	1.1037	0.358129	0.118898	0.972242	0.490992	1.15302	1.46201
23084	10571312	NM_176933	Dusp4	Mus musculus dual specificity phosphatase 4 (Dusp4), mRNA.	-0.94303	0.372814	0.808311	0.482295	7.37481	10	0	0	-1.75134	0	-0.674458	-1.41299	-1.42548	-0.767979	-0.621115	-0.756152	0.854999	0.7182	0.140793	1.43187	0.940265	0.270011	1.30204
15160	10497199	NR_033512	Gm6194	Mus musculus predicted gene 6194 (Gm6194), non-coding RNA.	-0.942936	0.292178	0.808231	0.526898	7.54364	9	0	0	-1.75117	0	-0.958392	-1.27802	-1.11678	-1.10383	-0.708516	-0.49209	0.483339	0.698525	0.476382	1.81026	1.11849	0.228123	0.842499
3379	10379989	ENSMUST00000020794	Fam33a	cdna:known chromosome:NCBIM37:11:86922736:86938137:1 gene:ENSMUSG00000020492 gene_biotype:protein_coding transcript_biotype:protein_coding	-0.942893	0.348637	0.808194	0.497618	7.42408	10	0	0	-1.75109	0	-1.28093	-0.788676	-1.23632	-1.20812	-0.434511	-0.708809	0.117922	0.924479	0.509858	1.31068	0.329826	1.05107	1.41352
3254	10378555	NM_001102611	Smyd4	Mus musculus SET and MYND domain containing 4 (Smyd4), mRNA.	-0.942815	0.317363	0.808127	0.515026	7.48788	10	0	0	-1.75094	0	-1.46911	-1.08641	-0.837821	-0.970106	-0.743877	-0.549568	1.11066	0.596183	0.247842	0.606026	0.372867	1.7477	0.975614
28138	10510194	---	---	---	-0.942783	0.244063	0.808099	0.547412	7.62433	8	0	0	-1.75088	0	-0.837335	-0.894014	-0.689241	-0.77132	-1.12538	-1.33941	1.73983	0.721699	0.123241	1.06765	0.284571	0.629049	1.09066
28140	10510212	---	---	---	-0.942783	0.244063	0.808099	0.547412	7.62433	8	0	0	-1.75088	0	-0.837335	-0.894014	-0.689241	-0.77132	-1.12538	-1.33941	1.73983	0.721699	0.123241	1.06765	0.284571	0.629049	1.09066
23903	10579872	NM_001025263	Tpd52	Mus musculus tumor protein D52 (Tpd52), transcript variant 3, mRNA.	-0.942483	0.268692	0.807843	0.538688	7.5682	9	0	0	-1.75033	0	-1.29334	-1.12457	-0.974456	-0.662927	-0.593847	-1.00577	1.02139	0.359332	0.00828629	1.16267	0.4176	1.29548	1.39014
9760	10443319	NM_027185	Def6	Mus musculus differentially expressed in FDCP 6 (Def6), mRNA.	-0.942377	0.293956	0.807751	0.527931	7.51622	9	0	0	-1.75013	0	-1.24606	-1.16226	-1.15281	-0.90771	-0.565606	-0.619822	1.05256	0.196603	0.470356	1.41468	1.38386	0.961731	0.174479
18628	10531633	NM_001077265	Hnrnpd	Mus musculus heterogeneous nuclear ribonucleoprotein D (Hnrnpd), transcript variant 1, mRNA.	-0.942185	0.178673	0.807587	0.569902	7.69408	7	0	0	-1.74977	0	-0.950738	-1.04624	-0.620961	-1.12803	-0.880302	-1.02684	0.990571	-0.00547229	0.122251	0.668587	1.09241	1.3986	1.38617
10088	10446656	NM_001164885	Lpin2	Mus musculus lipin 2 (Lpin2), transcript variant 1, mRNA.	-0.942051	0.165577	0.807472	0.573598	7.70399	7	0	0	-1.74952	0	-1.08758	-0.761833	-1.14421	-0.977884	-0.941885	-0.738908	1.66517	0.170526	-0.0221013	0.76843	0.990376	1.0671	1.01281
1749	10363312	NM_001162956	Ccdc138	Mus musculus coiled-coil domain containing 138 (Ccdc138), mRNA.	-0.941896	0.251897	0.80734	0.547288	7.57221	8	0	0	-1.74924	0	-1.20439	-1.06393	-1.15662	-0.945447	-0.693728	-0.587267	0.723275	0.0513094	0.369783	1.47079	0.489668	1.43416	1.1124
18696	10532390	NM_153570	Noc4l	Mus musculus nucleolar complex associated 4 homolog (S. cerevisiae) (Noc4l), mRNA.	-0.941828	0.419176	0.807281	0.45411	7.21664	10	0	0	-1.74911	0	-1.48948	-0.622295	-1.46123	-0.745424	-0.576011	-0.756524	1.02089	0.361989	0.0995347	0.966113	1.41788	1.09224	0.692325
2337	10368970	NM_007548	Prdm1	Mus musculus PR domain containing 1, with ZNF domain (Prdm1), mRNA.	-0.941669	0.320422	0.807145	0.517336	7.43365	10	0	0	-1.74881	0	-0.700831	-0.650998	-0.650226	-1.2845	-1.34472	-1.01874	0.197229	0.601748	0.207299	0.859955	0.893107	1.50475	1.38593
10356	10449303	NM_007523	Bak1	Mus musculus BCL2-antagonist/killer 1 (Bak1), mRNA.	-0.941572	0.301576	0.807062	0.527016	7.46734	9	0	0	-1.74863	0	-1.25862	-0.866398	-0.988349	-1.30289	-0.664506	-0.568663	0.317704	0.318331	1.31275	0.854925	1.65464	0.348298	0.842781
24015	10580986	NM_009033	Rbmxl1	Mus musculus RNA binding motif protein, X linked-like-1 (Rbmxl1), transcript variant 1, mRNA.	-0.941461	0.151518	0.806967	0.578611	7.69303	6	0	0	-1.74843	0	-0.98706	-0.691272	-0.826832	-1.09161	-1.0177	-1.03429	0.500794	0.666548	0.00431242	0.829899	0.537959	1.38121	1.72804
28141	10510227	---	---	---	-0.941408	0.301334	0.806922	0.527673	7.46097	9	0	0	-1.74833	0	-0.934429	-0.86472	-0.675803	-0.586548	-1.25042	-1.33653	1.57968	0.947283	-0.00859655	0.845627	0.402392	0.634771	1.2473
13702	10483025	NM_001141932	Rbms1	Mus musculus RNA binding motif, single stranded interacting protein 1 (Rbms1), transcript variant 1, mRNA.	-0.941338	0.38486	0.806861	0.480545	7.27941	10	0	0	-1.7482	0	-1.10206	-1.19587	-1.1182	-1.1725	-0.193278	-0.866115	1.13059	0.320355	0.0612361	0.788806	1.38425	1.19758	0.765219
25111	10591773	NM_016957	Hmgn2	Mus musculus high mobility group nucleosomal binding domain 2 (Hmgn2), mRNA.	-0.941181	0.34698	0.806727	0.504551	7.35785	10	0	0	-1.74791	0	-0.920869	-0.590055	-0.838955	-0.593388	-1.28312	-1.4207	0.304067	1.39462	0.380598	0.205785	0.883507	1.18281	1.2957
17229	10516765	NM_172702	Serinc2	Mus musculus serine incorporator 2 (Serinc2), transcript variant 1, mRNA.	-0.941155	0.504117	0.806704	0.378438	6.97388	9	0	0	-1.74786	0	-1.37798	-1.56605	-1.00531	-0.714886	-0.152677	-0.830031	0.898869	0.287137	0.373638	1.12876	1.10032	0.634645	1.22356
498	10350090	NM_026024	Ube2t	Mus musculus ubiquitin-conjugating enzyme E2T (putative) (Ube2t), mRNA.	-0.941138	0.159485	0.80669	0.577803	7.66967	7	0	0	-1.74783	0	-0.904774	-1.20874	-0.724359	-0.985743	-0.869687	-0.953523	0.447639	1.04604	0.104282	1.43313	0.104282	1.12443	1.38703
9737	10443047	NM_053173	Kifc5b	Mus musculus kinesin family member C5B (Kifc5b), mRNA.	-0.941115	0.356431	0.80667	0.499265	7.33462	10	0	0	-1.74778	0	-0.733366	-0.733101	-1.14425	-0.482118	-1.0881	-1.46575	0.239299	1.31827	0.238823	1.03611	0.370939	1.2578	1.18545
15568	10500736	NM_177545	Vangl1	Mus musculus vang-like 1 (van gogh, Drosophila) (Vangl1), mRNA.	-0.941086	0.315393	0.806645	0.521864	7.41972	10	0	0	-1.74773	0	-1.35982	-0.956071	-1.19208	-0.959304	-0.514071	-0.665168	0.627605	0.243386	0.238678	1.02235	0.780773	0.987866	1.74585
797	10353064	NM_001102430	Arfgef1	Mus musculus ADP-ribosylation factor guanine nucleotide-exchange factor 1(brefeldin A-inhibited) (Arfgef1), mRNA.	-0.941061	0.416673	0.806624	0.458955	7.19343	10	0	0	-1.74769	0	-1.39423	-1.25559	-1.1881	-0.928227	-0.458812	-0.42141	0.648258	0.362416	0.175719	1.52389	0.857483	1.13434	0.944262
30096	10343350	---	---	---	-0.940939	0.426873	0.806519	0.451551	7.16397	10	0	0	-1.74746	0	-1.20753	-1.51506	-1.12228	-0.893898	-0.453948	-0.452921	0.732459	0.168919	0.437918	1.59168	0.780729	0.908326	1.0256
17275	10517213	NM_001081047	Cnksr1	Mus musculus connector enhancer of kinase suppressor of Ras 1 (Cnksr1), mRNA.	-0.940939	0.392571	0.806519	0.476785	7.24593	10	0	0	-1.74746	0	-1.19942	-1.24422	-1.35565	-0.859583	-0.365837	-0.620915	0.65826	0.644191	0.115864	0.864751	0.794232	0.848982	1.71935
11455	10460423	ENSMUST00000008991	Spnb3	cdna:known chromosome:NCBIM37:19:4711208:4752353:1 gene:ENSMUSG00000067889 gene_biotype:protein_coding transcript_biotype:protein_coding	-0.940926	0.196362	0.806508	0.568912	7.61457	7	0	0	-1.74743	0	-1.17043	-1.10963	-0.696253	-0.723676	-1.0086	-0.936975	0.552845	0.504779	0.393704	1.10293	0.0720721	1.51947	1.49976
21401	10557519	NM_172746	Hirip3	Mus musculus HIRA interacting protein 3 (Hirip3), mRNA.	-0.940908	0.112522	0.806492	0.587629	7.70446	6	0	0	-1.7474	0	-0.903215	-0.789695	-0.858877	-0.963666	-1.04289	-1.0871	0.233544	0.440727	0.388769	0.835137	0.502586	1.69617	1.54852
15110	10496621	NM_145546	Gtf2b	Mus musculus general transcription factor IIB (Gtf2b), mRNA.	-0.94088	0.243294	0.806469	0.55374	7.54252	8	0	0	-1.74735	0	-1.23711	-0.826817	-1.20977	-0.790643	-0.624526	-0.956407	1.09374	0.274705	-0.0370732	0.854214	0.878508	0.911983	1.6692
29168	10338815	---	---	---	-0.94063	0.509673	0.806254	0.374641	6.94076	9	0	0	-1.74688	0	-0.502625	-1.18584	-1.46103	-1.31495	-1.03102	-0.148318	0.769915	1.06831	1.01528	0.430974	0.959417	1.2203	0.179582
21421	10557758	NM_178029	Setd1a	Mus musculus SET domain containing 1A (Setd1a), mRNA.	-0.940602	0.516041	0.80623	0.367439	6.92281	8	0	0	-1.74683	0	-1.14182	-1.65743	-0.954725	-1.18039	-0.482508	-0.226735	1.09622	0.412946	0.489976	0.408595	1.22055	1.18138	0.833936
24951	10590325	NM_007614	Ctnnb1	Mus musculus catenin (cadherin associated protein), beta 1 (Ctnnb1), transcript variant 1, mRNA.	-0.940572	0.428099	0.806204	0.452004	7.14719	10	0	0	-1.74678	0	-1.51312	-1.32119	-1.09598	-0.65117	-0.541282	-0.520676	0.794151	0.0573497	0.462761	1.20211	1.22509	1.24496	0.657017
29645	10341081	---	---	---	-0.94055	0.313031	0.806186	0.524833	7.40239	9	0	0	-1.74674	0	-1.2297	-1.07882	-1.29287	-0.679234	-0.507523	-0.85516	-0.0255794	0.955384	0.409486	1.61035	1.08832	0.968399	0.636942
12487	10470973	NM_198304	Nup188	Mus musculus nucleoporin 188 (Nup188), mRNA.	-0.940517	0.172156	0.806158	0.576649	7.62725	7	0	0	-1.74667	0	-1.11629	-0.983294	-0.959746	-1.11434	-0.744128	-0.725313	0.373867	0.372618	-4.91e-05	1.11593	0.864502	1.35595	1.56029
19867	10544133	NM_172893	Parp12	Mus musculus poly (ADP-ribose) polymerase family, member 12 (Parp12), mRNA.	-0.940488	0.243461	0.806133	0.554913	7.52542	8	0	0	-1.74662	0	-0.933626	-0.537511	-1.16549	-0.985906	-0.821094	-1.19931	0.623714	0.8611	1.2205	0.133344	0.932082	0.182012	1.69018
5057	10397719	NM_028354	Tdp1	Mus musculus tyrosyl-DNA phosphodiesterase 1 (Tdp1), mRNA.	-0.940278	0.294303	0.805952	0.534678	7.42735	9	0	0	-1.74623	0	-1.2421	-0.873831	-1.0499	-0.461954	-0.797341	-1.21654	-0.0181551	1.19365	1.13387	1.09356	0.285521	1.40467	0.548543
1094	10356461	NM_198652	Hjurp	Mus musculus Holliday junction recognition protein (Hjurp), mRNA.	-0.940238	0.533494	0.805918	0.347877	6.86356	8	0	0	-1.74616	0	-0.700724	-0.597022	-0.643956	-1.88058	-1.27971	-0.539433	0.690919	1.05846	0.142136	0.950882	0.760648	1.23652	0.80186
24821	10588577	NM_009895	Cish	Mus musculus cytokine inducible SH2-containing protein (Cish), mRNA.	-0.940235	0.458723	0.805916	0.427612	7.05881	10	0	0	-1.74615	0	-1.06944	-1.20713	-1.22489	-1.3889	-0.227071	-0.523973	0.738488	0.112876	0.568614	1.5292	0.899332	0.834468	0.95843
10561	10450982	NM_030067	Gpr115	Mus musculus G protein-coupled receptor 115 (Gpr115), mRNA.	-0.940086	0.193459	0.805788	0.57231	7.58153	7	0	0	-1.74587	0	-1.04677	-0.692021	-0.939948	-1.25382	-0.832154	-0.8758	0.925336	0.0268703	0.11605	1.27355	0.70737	1.57854	1.0128
18789	10533237	NM_033541	Oas1c	Mus musculus 2'-5' oligoadenylate synthetase 1C (Oas1c), mRNA.	-0.939718	0.4544	0.805473	0.433528	7.05091	10	0	0	-1.74519	0	-1.40501	-1.17137	-1.03302	-1.27798	-0.341255	-0.409674	1.341	0.484408	0.801189	0.872234	0.831787	1.23979	0.067903
15560	10500630	NM_001013026	Ttf2	Mus musculus transcription termination factor, RNA polymerase II (Ttf2), mRNA.	-0.93962	0.244582	0.805389	0.557228	7.48664	8	0	0	-1.74501	0	-1.09706	-0.947078	-1.18577	-1.04598	-0.495848	-0.865982	0.721811	0.11524	0.197411	1.0909	0.596412	1.3292	1.58675
17846	10523297	ENSMUST00000031331	Ccng2	cdna:known chromosome:NCBIM37:5:93696283:93705257:1 gene:ENSMUSG00000029385 gene_biotype:protein_coding transcript_biotype:protein_coding	-0.939574	0.341864	0.805349	0.512955	7.30436	10	0	0	-1.74492	0	-1.243	-0.901978	-1.28524	-0.600574	-1.1345	-0.472161	0.960357	0.56784	0.0867637	0.821206	0.364644	1.55248	1.28415
1050	10355967	NM_183027	Ap1s3	Mus musculus adaptor-related protein complex AP-1, sigma 3 (Ap1s3), mRNA.	-0.939559	0.564253	0.805336	0.308628	6.75774	7	0	0	-1.74489	0	-1.4763	-1.18121	-1.31871	-1.19997	-0.111121	-0.350034	1.12069	0.470118	0.284701	0.898498	0.997312	0.860602	1.00543
28655	10590648	---	---	---	-0.939433	0.485891	0.805228	0.405296	6.96113	9	0	0	-1.74466	0	-0.988488	-1.03655	-0.993391	-1.44591	-0.011875	-1.16038	0.849227	1.31642	0.630182	1.27833	0.136021	0.75255	0.673867
14757	10493086	NM_008231	Hdgf	Mus musculus hepatoma-derived growth factor (Hdgf), mRNA.	-0.939323	0.359138	0.805134	0.503892	7.25792	10	0	0	-1.74446	0	-1.07159	-1.11603	-1.28348	-1.192	-0.443725	-0.529112	0.950116	0.436529	0.113593	0.786116	0.725002	0.883851	1.74073
20669	10550906	NM_011113	Plaur	Mus musculus plasminogen activator, urokinase receptor (Plaur), mRNA.	-0.939267	0.373245	0.805086	0.495474	7.22504	10	0	0	-1.74435	0	-0.999189	-0.872298	-1.30121	-1.19832	-0.243767	-1.02082	0.970036	0.746863	0.263188	0.112319	1.58035	0.92871	1.03413
30239	10344049	---	---	---	-0.939172	0.370917	0.805005	0.497261	7.22649	10	0	0	-1.74418	0	-1.10408	-0.910994	-1.05408	-1.26162	-1.08684	-0.217418	0.90266	0.0874116	0.869502	0.293724	0.713176	1.46799	1.30056
23878	10579659	NM_016957	Hmgn2	Mus musculus high mobility group nucleosomal binding domain 2 (Hmgn2), mRNA.	-0.939122	0.361029	0.804961	0.503464	7.246	10	0	0	-1.74408	0	-0.924582	-0.548538	-0.868757	-0.576763	-1.28158	-1.43451	0.310292	1.37933	0.309247	0.262946	0.872757	1.19581	1.30435
14211	10487722	NM_001081162	Slc4a11	Mus musculus solute carrier family 4, sodium bicarbonate transporter-like, member 11 (Slc4a11), mRNA.	-0.939096	0.152784	0.80494	0.585432	7.58621	6	0	0	-1.74404	0	-1.08903	-1.12189	-0.863913	-0.749097	-0.813704	-0.996945	0.653115	0.870687	0.000656	1.11114	1.18786	1.6544	0.156728
3725	10383575	NM_029878	Tbcd	Mus musculus tubulin-specific chaperone d (Tbcd), mRNA.	-0.939081	0.245785	0.804927	0.558473	7.462	8	0	0	-1.74401	0	-1.15382	-0.898129	-1.11252	-1.14845	-0.547978	-0.773595	1.22604	-0.0468661	0.563775	0.377974	1.08925	1.60934	0.814978
23383	10574378	NM_030198	Gins3	Mus musculus GINS complex subunit 3 (Psf3 homolog) (Gins3), mRNA.	-0.939028	0.173042	0.804882	0.580918	7.56081	7	0	0	-1.74391	0	-1.08859	-1.02767	-1.14365	-0.790748	-0.713465	-0.870056	1.12189	-0.0240168	0.0518155	1.44215	0.820196	0.915781	1.30636
2993	10375880	NM_026631	Nhp2	Mus musculus NHP2 ribonucleoprotein homolog (yeast) (Nhp2), mRNA.	-0.938866	0.227706	0.804742	0.565488	7.48088	8	0	0	-1.74361	0	-0.96081	-0.748587	-0.757398	-0.882598	-0.913848	-1.36996	1.09272	0.138269	0.00951877	0.674009	1.03726	1.1025	1.57892
11446	10460317	ENSMUST00000100022	Pitpnm1	cdna:known chromosome:NCBIM37:19:4100622:4113965:1 gene:ENSMUSG00000024851 gene_biotype:protein_coding transcript_biotype:protein_coding	-0.938855	0.204413	0.804733	0.57289	7.51364	7	0	0	-1.74359	0	-0.718617	-0.963791	-1.1608	-1.2005	-0.810964	-0.778465	0.855835	0.249561	0.803047	0.722397	2.00776	0.584629	0.409903
11722	10462879	---	---	ncrna:snoRNA chromosome:NCBIM37:19:38146419:38146543:1 gene:ENSMUSG00000064646 gene_biotype:snoRNA transcript_biotype:snoRNA	-0.938645	0.307479	0.804553	0.533825	7.33583	9	0	0	-1.7432	0	-0.68225	-1.0081	-0.503436	-0.954088	-1.36129	-1.12271	0.158578	1.38003	0.0889665	1.31061	0.577124	0.978533	1.13803
6193	10408077	ENSMUST00000074752	Hist1h2ak	cdna:known chromosome:NCBIM37:13:21845264:21845776:-1 gene:ENSMUSG00000063021 gene_biotype:protein_coding transcript_biotype:protein_coding	-0.938579	0.651493	0.804496	0.101403	6.48663	5	0	0	-1.74308	0	-0.900481	-0.243783	-0.557682	-0.46154	-1.73299	-1.735	0.657657	0.974268	0.766329	0.768773	0.75183	0.841555	0.871063
8214	10427885	NM_001165971	Gm5803	Mus musculus predicted gene 5803 (Gm5803), mRNA.	-0.938523	0.349861	0.804448	0.512034	7.24638	10	0	0	-1.74297	0	-1.08158	-1.16309	-0.656139	-0.687694	-0.582709	-1.45992	0.190248	0.47221	0.533246	0.869212	0.64594	1.21244	1.70784
14143	10486754	NM_178795	Ppip5k1	Mus musculus diphosphoinositol pentakisphosphate kinase 1 (Ppip5k1), mRNA.	-0.938518	0.243146	0.804444	0.561187	7.44262	8	0	0	-1.74296	0	-1.11068	-1.03338	-1.27619	-0.784109	-0.619262	-0.807488	0.136498	0.0741326	0.564994	1.48848	0.958051	1.34799	1.06097
8795	10434067	NM_029945	Smpd4	Mus musculus sphingomyelin phosphodiesterase 4 (Smpd4), transcript variant 1, mRNA.	-0.938516	0.43811	0.804443	0.451945	7.04727	10	0	0	-1.74296	0	-1.16238	-0.987575	-1.16816	-1.47733	-0.313236	-0.52241	1.39194	0.218807	0.175322	0.820411	0.99391	1.10615	0.924555
21159	10555586	NM_025605	2400001E08Rik	Mus musculus RIKEN cDNA 2400001E08 gene (2400001E08Rik), mRNA.	-0.938495	0.237387	0.804424	0.56331	7.4506	8	0	0	-1.74292	0	-0.746471	-0.795033	-1.24379	-0.663848	-1.02305	-1.15878	0.303295	0.165575	0.205594	1.01725	1.35139	1.47049	1.11737
16294	10507653	---	---	cdna:pseudogene chromosome:NCBIM37:4:119193595:119193971:1 gene:ENSMUSG00000084379 gene_biotype:pseudogene transcript_biotype:transcribed_processed_pseudogene	-0.938431	0.414938	0.80437	0.470131	7.09898	10	0	0	-1.7428	0	-0.61101	-0.762128	-1.02996	-0.794071	-0.69782	-1.73559	0.305807	1.55062	0.598609	0.526485	0.481301	0.818838	1.34893
22013	10563191	NM_175130	Trpm4	Mus musculus transient receptor potential cation channel, subfamily M, member 4 (Trpm4), mRNA.	-0.938225	0.128032	0.804193	0.592925	7.5718	6	0	0	-1.74242	0	-1.08584	-0.930961	-0.908677	-0.908915	-1.06341	-0.731549	1.50777	0.951852	-0.0158399	0.914661	0.206071	1.50462	0.56021
23339	10574027	NM_013602	Mt1	Mus musculus metallothionein 1 (Mt1), mRNA.	-0.938158	0.399386	0.804135	0.482213	7.12457	10	0	0	-1.74229	0	-1.01162	-0.409798	-1.10963	-0.634015	-1.56244	-0.901445	0.348	1.10874	0.355511	0.293209	1.49105	0.82885	1.20359
2490	10370892	NM_025852	Rexo1	Mus musculus REX1, RNA exonuclease 1 homolog (S. cerevisiae) (Rexo1), transcript variant 1, mRNA.	-0.938158	0.447896	0.804135	0.445285	7.01076	10	0	0	-1.74229	0	-1.00015	-1.59329	-0.310818	-0.755357	-0.721307	-1.24803	0.744928	0.690738	0.125534	0.495741	1.48374	1.18667	0.901587
12621	10472350	NM_145523	Gca	Mus musculus grancalcin (Gca), mRNA.	-0.938131	0.544347	0.804112	0.344411	6.76472	8	0	0	-1.74224	0	-1.20416	-0.872069	-1.32255	-1.53063	-0.0217599	-0.677621	0.594089	0.52883	0.724484	0.359482	1.00887	1.10162	1.31141
25540	10596051	NM_001101483	Tmem22	Mus musculus transmembrane protein 22 (Tmem22), mRNA.	-0.938067	0.402962	0.804057	0.480059	7.11305	10	0	0	-1.74212	0	-0.969562	-1.48951	-1.26871	-0.910955	-0.538551	-0.451106	0.626733	0.562107	0.0897205	1.41518	0.525952	1.12955	1.27916
11470	10460573	ENSMUST00000025759	Eif1ad	cdna:known chromosome:NCBIM37:19:5366813:5371511:1 gene:ENSMUSG00000024841 gene_biotype:protein_coding transcript_biotype:protein_coding	-0.937728	0.265918	0.803767	0.554999	7.37308	8	0	0	-1.7415	0	-1.20469	-1.13682	-1.05607	-1.0195	-0.610922	-0.598371	0.644176	0.315758	-0.0521968	1.29625	1.06339	0.819247	1.53975
26880	10607116	ENSMUST00000041317	Ammecr1	cdna:known chromosome:NCBIM37:X:139285689:139401271:-1 gene:ENSMUSG00000042225 gene_biotype:protein_coding transcript_biotype:protein_coding	-0.937498	0.398066	0.80357	0.485496	7.10304	10	0	0	-1.74107	0	-1.05412	-1.2605	-1.40345	-0.980905	-0.513364	-0.412648	0.403806	0.180264	0.647947	0.778499	1.14796	0.813014	1.6535
11535	10461220	NM_001081196	Hnrnpul2	Mus musculus heterogeneous nuclear ribonucleoprotein U-like 2 (Hnrnpul2), mRNA.	-0.93749	0.365094	0.803563	0.506659	7.17464	10	0	0	-1.74105	0	-1.25528	-1.22303	-1.27196	-0.701411	-0.773877	-0.399374	0.989862	0.359185	0.0926866	0.686355	0.748799	1.63393	1.11412
18749	10532896	NM_181075	2610524H06Rik	Mus musculus RIKEN cDNA 2610524H06 gene (2610524H06Rik), mRNA.	-0.937481	0.373527	0.803555	0.50154	7.15632	10	0	0	-1.74104	0	-1.21573	-0.402794	-0.801159	-0.721235	-1.03764	-1.44632	1.04883	0.148498	0.549478	1.52165	0.399542	0.650282	1.3066
1125	10356848	NM_025920	Thap4	Mus musculus THAP domain containing 4 (Thap4), mRNA.	-0.936717	0.343547	0.802901	0.521647	7.18971	10	0	0	-1.73962	0	-0.933619	-0.804761	-1.32041	-0.448658	-1.33804	-0.77481	1.1891	0.755328	-0.00975441	1.29307	0.622693	1.40198	0.367888
9500	10440681	NM_130870	Krtap16-1	Mus musculus keratin associated protein 16-1 (Krtap16-1), mRNA.	-0.936692	0.446074	0.802879	0.452482	6.96317	10	0	0	-1.73957	0	-0.566516	-1.40969	-1.13359	-1.14303	-1.1445	-0.222816	0.757408	0.85428	0.646329	1.73232	0.282837	0.798839	0.548134
6593	10411776	NM_008210	H3f3a	Mus musculus H3 histone, family 3A (H3f3a), mRNA.	-0.936633	0.374115	0.802828	0.504111	7.12325	10	0	0	-1.73946	0	-1.34346	-1.11014	-0.996415	-1.0357	-0.237178	-0.896911	1.41456	0.716225	1.47584	0.877104	0.646254	0.107946	0.381865
26304	10602599	NM_019710	Smc1a	Mus musculus structural maintenance of chromosomes 1A (Smc1a), mRNA.	-0.93661	0.246342	0.802809	0.565926	7.35912	8	0	0	-1.73942	0	-1.2211	-0.928729	-1.14205	-0.763044	-0.555968	-1.00877	0.29813	0.537671	0.238339	0.641182	0.92589	1.87289	1.10556
19271	10538420	NM_180678	Gars	Mus musculus glycyl-tRNA synthetase (Gars), mRNA.	-0.936485	0.317681	0.802702	0.535888	7.23123	9	0	0	-1.73919	0	-0.962936	-1.13944	-1.18143	-1.05237	-0.313422	-0.969306	1.13358	0.148424	0.276224	0.689292	0.77185	0.852363	1.74718
23394	10574436	NM_011317	Khdrbs1	Mus musculus KH domain containing, RNA binding, signal transduction associated 1 (Khdrbs1), transcript variant 1, mRNA.	-0.935725	0.328331	0.80205	0.532997	7.18172	10	0	0	-1.73778	0	-1.06025	-0.887127	-0.996472	-1.28244	-0.319596	-1.06847	0.19459	0.191284	0.736103	0.526125	1.10684	1.45411	1.4053
22856	10569102	NM_016850	Irf7	Mus musculus interferon regulatory factor 7 (Irf7), transcript variant 1, mRNA.	-0.935529	0.298551	0.801882	0.548019	7.22924	9	0	0	-1.73741	0	-0.907669	-0.376136	-1.16279	-1.04446	-0.925159	-1.19696	0.34269	0.96376	1.73168	0.266444	1.07157	0.988446	0.248586
9379	10439895	ENSMUST00000023312	Alcam	cdna:known chromosome:NCBIM37:16:52249109:52454187:-1 gene:ENSMUSG00000022636 gene_biotype:protein_coding transcript_biotype:protein_coding	-0.935412	0.38776	0.801782	0.499711	7.04915	10	0	0	-1.73719	0	-1.1894	-1.34105	-1.24879	-0.811179	-0.667374	-0.354676	0.839042	0.0305422	0.39449	0.831413	1.33579	1.46697	0.714226
15709	10502257	ENSMUST00000029651	Gstcd	cdna:known chromosome:NCBIM37:3:132644717:132754742:-1 gene:ENSMUSG00000028018 gene_biotype:protein_coding transcript_biotype:protein_coding	-0.935284	0.380353	0.801672	0.504872	7.06027	10	0	0	-1.73696	0	-1.06425	-1.04545	-1.17707	-1.38179	-0.413748	-0.529396	0.675786	0.325353	0.118611	0.901765	0.745083	1.28863	1.55647
6870	10414497	NM_009632	Parp2	Mus musculus poly (ADP-ribose) polymerase family, member 2 (Parp2), mRNA.	-0.935061	0.335024	0.801481	0.531687	7.1437	10	0	0	-1.73654	0	-1.53293	-0.809872	-0.836933	-1.1064	-0.654704	-0.669534	0.554899	0.579376	0.148368	0.725375	0.535032	1.46121	1.60611
31280	10339266	---	---	---	-0.935005	0.482274	0.801433	0.427313	6.81875	10	0	0	-1.73644	0	-0.631144	-1.42634	-0.750161	-0.471161	-1.65219	-0.679033	1.44027	0.327286	0.774779	0.206307	0.846515	1.10957	0.905309
24553	10585586	NM_133777	Ube2s	Mus musculus ubiquitin-conjugating enzyme E2S (Ube2s), mRNA.	-0.934909	0.217781	0.801351	0.580715	7.33177	7	0	0	-1.73626	0	-0.881497	-0.906863	-0.756222	-0.709006	-1.05062	-1.30525	-0.061311	1.33321	0.222985	0.937948	0.617616	1.0037	1.55531
8114	10427015	NM_007395	Acvr1b	Mus musculus activin A receptor, type 1B (Acvr1b), mRNA.	-0.934851	0.379423	0.801301	0.506939	7.04647	10	0	0	-1.73615	0	-1.27967	-1.22931	-1.29927	-0.471178	-0.766311	-0.563365	0.465132	0.076668	0.36254	1.37765	1.19791	0.860673	1.26854
6764	10413710	NM_027289	Nt5dc2	Mus musculus 5'-nucleotidase domain containing 2 (Nt5dc2), mRNA.	-0.934826	0.432603	0.80128	0.4702	6.9292	10	0	0	-1.73611	0	-1.14708	-1.16849	-1.46354	-0.7627	-0.213493	-0.853652	0.52869	0.864427	0.382557	0.821047	0.285314	1.65859	1.06833
29288	10339391	---	---	---	-0.934748	0.367421	0.801213	0.514602	7.0676	10	0	0	-1.73596	0	-1.60596	-0.840974	-1.01035	-0.929483	-0.618654	-0.603066	0.824827	0.513197	0.0559365	0.94821	0.512641	1.67881	1.07487
29804	10341873	---	---	---	-0.934733	0.480609	0.8012	0.429975	6.81367	10	0	0	-1.73593	0	-1.43605	-1.4439	-1.01501	-0.971368	-0.394158	-0.347918	0.445762	0.487378	0.361111	1.53832	0.751386	1.1794	0.845048
25889	10599174	NM_133990	Il13ra1	Mus musculus interleukin 13 receptor, alpha 1 (Il13ra1), mRNA.	-0.934664	0.261786	0.801141	0.566124	7.25731	8	0	0	-1.7358	0	-1.23517	-1.09373	-1.11508	-0.610646	-0.635973	-0.917382	1.36487	-0.0156715	0.790715	0.68125	1.40415	0.173752	1.20891
18733	10532720	NM_016926	Sart3	Mus musculus squamous cell carcinoma antigen recognized by T cells 3 (Sart3), mRNA.	-0.934572	0.152141	0.801062	0.598862	7.39461	6	0	0	-1.73563	0	-0.958959	-0.912252	-0.923786	-0.745821	-1.20565	-0.860969	0.894904	0.0964772	0.0452815	0.65567	0.909168	1.67209	1.33384
11139	10457225	ENSMUST00000025078	Map3k8	cdna:known chromosome:NCBIM37:18:4331325:4352951:-1 gene:ENSMUSG00000024235 gene_biotype:protein_coding transcript_biotype:protein_coding	-0.934498	0.275896	0.800998	0.561027	7.22804	9	0	0	-1.7355	0	-1.32829	-0.702608	-1.2354	-0.699545	-0.815862	-0.825282	0.852432	0.0394174	0.461847	0.424575	1.61451	1.42328	0.790924
10607	10451547	---	---	cdna:known chromosome:NCBIM37:17:47153645:47153905:-1 gene:ENSMUSG00000091775 gene_biotype:protein_coding transcript_biotype:protein_coding	-0.934435	0.429677	0.800944	0.473865	6.92223	10	0	0	-1.73538	0	-0.872451	-0.508281	-0.886797	-0.460126	-1.42746	-1.45149	0.448638	1.32466	0.428177	0.270548	0.585976	1.14342	1.40519
3675	10383012	NM_133757	Pgs1	Mus musculus phosphatidylglycerophosphate synthase 1 (Pgs1), mRNA.	-0.934406	0.175471	0.80092	0.594006	7.36354	7	0	0	-1.73533	0	-0.918391	-0.926607	-1.09009	-1.17287	-0.704756	-0.793722	0.979039	0.247007	0.639384	0.689286	2.04921	0.468727	0.53378
5644	10403108	NM_016957	Hmgn2	Mus musculus high mobility group nucleosomal binding domain 2 (Hmgn2), mRNA.	-0.934365	0.387346	0.800885	0.503599	7.01225	10	0	0	-1.73525	0	-0.960842	-0.561134	-0.820669	-0.553742	-1.13278	-1.57703	0.27099	1.37998	0.200468	0.421856	0.841098	1.20304	1.28875
12397	10469828	ENSMUST00000102942	Psd4	cdna:known chromosome:NCBIM37:2:24223130:24264702:1 gene:ENSMUSG00000026979 gene_biotype:protein_coding transcript_biotype:protein_coding	-0.93428	0.346688	0.800811	0.527995	7.0919	10	0	0	-1.73509	0	-1.17327	-0.981566	-1.16446	-1.26234	-0.622441	-0.401592	0.545259	0.879635	0.0154712	1.34733	0.352305	0.996986	1.4687
7119	10416510	NM_013745	Nufip1	Mus musculus nuclear fragile X mental retardation protein interacting protein 1 (Nufip1), mRNA.	-0.934008	0.462607	0.800579	0.448937	6.83207	10	0	0	-1.73459	0	-1.21476	-1.24773	-1.03576	-1.07558	-0.00942343	-1.0208	1.38128	0.61819	0.217929	0.447723	0.884502	0.663189	1.39124
3676	10383023	AK084985	Gm10099	Mus musculus 13 days embryo lung cDNA, RIKEN full-length enriched library, clone:D430021L16 product:hypothetical protein, full insert sequence.	-0.93397	0.206681	0.800546	0.58687	7.30869	7	0	0	-1.73452	0	-0.957366	-0.675765	-0.683348	-1.04395	-1.09957	-1.14382	1.44564	-0.0690367	0.295683	0.713186	1.44449	0.569065	1.2048
1310	10358787	NM_008485	Lamc2	Mus musculus laminin, gamma 2 (Lamc2), mRNA.	-0.933469	0.212015	0.800116	0.586767	7.28186	7	0	0	-1.73358	0	-1.092	-0.95743	-1.01466	-1.17631	-0.629229	-0.73118	1.41866	0.409404	-0.0472815	0.313747	0.967725	1.50118	1.03737
5893	10405427	NM_025596	Prelid1	Mus musculus PRELI domain containing 1 (Prelid1), nuclear gene encoding mitochondrial protein, mRNA.	-0.933343	0.357869	0.800008	0.524847	7.03563	10	0	0	-1.73335	0	-1.19489	-0.484924	-1.49318	-0.726559	-0.871214	-0.82929	0.380266	1.5467	-0.0102934	0.660327	1.16473	1.12483	0.7335
8636	10432398	NM_011654	Tuba1b	Mus musculus tubulin, alpha 1B (Tuba1b), mRNA.	-0.933317	0.571439	0.799986	0.331904	6.54375	7	0	0	-1.7333	0	-1.39492	-1.20009	-1.12087	-1.256	0.156142	-0.784168	0.455076	1.14655	0.506676	1.01027	0.931248	0.405467	1.14461
3925	10385557	NM_212484	Cnot6	Mus musculus CCR4-NOT transcription complex, subunit 6 (Cnot6), mRNA.	-0.933087	0.41879	0.799789	0.486746	6.89974	10	0	0	-1.73288	0	-1.15285	-1.27316	-1.20898	-1.16326	-0.489105	-0.31118	1.00227	0.0954464	0.224015	0.825973	0.837929	1.16974	1.44315
16621	10511207	NM_028020	Cpsf3l	Mus musculus cleavage and polyadenylation specific factor 3-like (Cpsf3l), mRNA.	-0.933029	0.252902	0.799739	0.574438	7.20738	8	0	0	-1.73277	0	-1.03079	-0.607861	-1.33102	-0.749856	-0.860335	-1.01832	0.0182602	0.0400206	0.628167	1.16968	1.1907	1.17612	1.37522
20250	10547469	NM_001199083	Wnk1	Mus musculus WNK lysine deficient protein kinase 1 (Wnk1), transcript variant 4, mRNA.	-0.932987	0.535036	0.799703	0.380619	6.62479	8	0	0	-1.73269	0	-1.1144	-1.46489	-1.12105	-1.31867	-0.062401	-0.516513	1.54172	0.472296	0.61914	0.663361	0.486694	0.767534	1.04718
17302	10517486	---	---	cdna:pseudogene chromosome:NCBIM37:4:136164755:136165721:-1 gene:ENSMUSG00000083054 gene_biotype:pseudogene transcript_biotype:transcribed_processed_pseudogene	-0.932952	0.301304	0.799673	0.554878	7.12617	9	0	0	-1.73263	0	-0.425769	-1.36237	-0.936157	-0.874733	-0.993326	-1.00536	0.202699	0.842816	0.457832	0.308517	1.69398	0.72195	1.36992
27922	10468421	---	---	---	-0.932941	0.15722	0.799664	0.60248	7.32327	6	0	0	-1.73261	0	-1.04582	-1.00014	-0.806414	-0.688529	-0.949716	-1.10702	1.40702	0.573909	-0.0676037	1.56573	1.179	0.639393	0.300202
10882	10454525	NM_173441	Iws1	Mus musculus IWS1 homolog (S. cerevisiae) (Iws1), mRNA.	-0.932935	0.268319	0.799658	0.568866	7.18005	8	0	0	-1.73259	0	-1.10816	-1.09826	-0.972611	-1.07306	-0.403181	-0.942333	0.890876	0.00490311	0.210233	0.572705	1.03854	1.32799	1.55236
6754	10413574	NM_019460	Sfmbt1	Mus musculus Scm-like with four mbt domains 1 (Sfmbt1), transcript variant 3, mRNA.	-0.932748	0.417021	0.799498	0.489213	6.89189	10	0	0	-1.73225	0	-1.27229	-0.802735	-0.990726	-1.44067	-0.841137	-0.248931	1.08935	0.281697	0.0555858	0.66446	1.26859	1.32907	0.907736
8610	10432101	NM_144851	Senp1	Mus musculus SUMO1/sentrin specific peptidase 1 (Senp1), mRNA.	-0.932413	0.357198	0.799211	0.528286	7.00342	10	0	0	-1.73162	0	-1.10659	-1.25743	-1.13524	-1.11485	-0.355241	-0.625124	0.274167	0.114881	0.381643	1.16912	0.995713	1.42531	1.23364
9113	10437222	NM_053263	Hnrnpa3	Mus musculus heterogeneous nuclear ribonucleoprotein A3 (Hnrnpa3), transcript variant c, mRNA.	-0.932381	0.218534	0.799184	0.587984	7.23063	7	0	0	-1.73156	0	-1.00982	-1.17482	-1.16853	-0.760631	-0.653893	-0.826588	0.495851	0.0604	0.182688	0.689108	1.35664	1.3993	1.41029
24508	10585129	NM_012039	Zw10	Mus musculus ZW10 homolog (Drosophila), centromere/kinetochore protein (Zw10), mRNA.	-0.932291	0.312897	0.799106	0.551587	7.08131	9	0	0	-1.7314	0	-1.20211	-1.12922	-1.22099	-0.944182	-0.544114	-0.553124	0.480397	0.361328	0.0141005	1.49523	0.724725	1.22066	1.2973
15846	10503370	NM_146130	Hnrnpa3	Mus musculus heterogeneous nuclear ribonucleoprotein A3 (Hnrnpa3), transcript variant b, mRNA.	-0.932143	0.256361	0.79898	0.575828	7.16825	8	0	0	-1.73112	0	-1.06243	-1.29445	-1.08912	-0.778574	-0.616596	-0.751685	0.580483	-0.0286903	0.22382	0.755418	1.35039	1.35772	1.35372
10740	10452980	NM_011163	Eif2ak2	Mus musculus eukaryotic translation initiation factor 2-alpha kinase 2 (Eif2ak2), mRNA.	-0.9321	0.341962	0.798943	0.53763	7.02135	10	0	0	-1.73104	0	-1.15517	-0.693539	-1.15927	-1.20492	-0.347351	-1.03235	0.156706	0.275401	1.01754	0.455697	1.5038	1.41871	0.764745
940	10354704	NM_031179	Sf3b1	Mus musculus splicing factor 3b, subunit 1 (Sf3b1), mRNA.	-0.93196	0.482089	0.798823	0.439663	6.71929	10	0	0	-1.73078	0	-1.48993	-1.21414	-1.07827	-1.13538	-0.351359	-0.322688	1.04103	0.20823	0.203915	0.684327	1.06068	1.19847	1.19511
13390	10479268	NM_001113533	Wtap	Mus musculus Wilms' tumour 1-associating protein (Wtap), transcript variant 1, mRNA.	-0.931836	0.460725	0.798717	0.458823	6.76431	10	0	0	-1.73055	0	-1.0574	-0.885919	-0.6573	-0.433785	-0.788432	-1.76818	0.312236	0.581147	0.513958	0.58691	0.911148	0.990356	1.69526
23458	10575184	NM_025830	Wwp2	Mus musculus WW domain containing E3 ubiquitin protein ligase 2 (Wwp2), mRNA.	-0.931647	0.294611	0.798555	0.561901	7.08893	9	0	0	-1.7302	0	-1.03306	-0.928668	-1.04635	-1.16344	-0.350142	-1.06821	0.512379	0.323545	0.535769	0.429488	1.54291	1.67839	0.567404
10053	10446229	NM_009404	Tnfsf9	Mus musculus tumor necrosis factor (ligand) superfamily, member 9 (Tnfsf9), mRNA.	-0.931537	0.228247	0.79846	0.587392	7.18511	8	0	0	-1.73	0	-0.836092	-1.00644	-1.01417	-1.23553	-0.5491	-0.94789	1.02018	0.0445665	0.346913	1.47249	1.59878	0.682762	0.423539
29091	10338460	---	---	---	-0.931255	0.408844	0.798218	0.500125	6.85829	10	0	0	-1.72947	0	-1.00497	-1.39729	-1.30667	-0.984729	-0.45742	-0.436454	0.596809	0.175251	0.236076	1.34832	0.734137	1.39667	1.10027
13004	10475394	ENSMUST00000036647	Ctdspl2	cdna:known chromosome:NCBIM37:2:121781737:121839378:1 gene:ENSMUSG00000033411 gene_biotype:protein_coding transcript_biotype:protein_coding	-0.931232	0.243465	0.798199	0.583182	7.15246	8	0	0	-1.72943	0	-1.20657	-0.921971	-0.877696	-1.22643	-0.705344	-0.649376	1.5253	0.0882447	0.202958	0.471415	0.71859	1.45755	1.12334
21799	10561017	NM_008776	Pafah1b3	Mus musculus platelet-activating factor acetylhydrolase, isoform 1b, subunit 3 (Pafah1b3), mRNA.	-0.931218	0.173115	0.798187	0.603799	7.23881	7	0	0	-1.7294	0	-0.974826	-0.726536	-1.01698	-0.734967	-1.17495	-0.959051	0.0744837	1.50517	0.370422	0.556239	0.323826	1.48723	1.26994
13516	10480672	NM_023464	Ssna1	Mus musculus Sjogren's syndrome nuclear autoantigen 1 (Ssna1), mRNA.	-0.931128	0.275187	0.79811	0.571623	7.10111	8	0	0	-1.72924	0	-1.22267	-1.26971	-0.968287	-0.73044	-0.57846	-0.817206	0.628947	0.204861	0.00401567	1.37683	0.760912	1.52694	1.08427
18866	10534253	NM_001081462	Gtf2ird1	Mus musculus general transcription factor II I repeat domain-containing 1 (Gtf2ird1), transcript variant 2, mRNA.	-0.931114	0.338989	0.798098	0.542352	6.99146	10	0	0	-1.72921	0	-1.20024	-0.918079	-1.25323	-1.11757	-0.737309	-0.360251	1.75583	0.0270161	0.424697	0.750941	0.958474	0.631171	1.03856
2916	10375265	NM_176999	Atp10b	Mus musculus ATPase, class V, type 10B (Atp10b), mRNA.	-0.930668	0.33513	0.797716	0.54576	6.98263	10	0	0	-1.72838	0	-0.968025	-1.14338	-1.10798	-1.02032	-1.08554	-0.258764	0.0530651	1.25756	0.0774355	1.38729	1.17128	0.903344	0.734035
23417	10574656	NM_015821	Fbxl8	Mus musculus F-box and leucine-rich repeat protein 8 (Fbxl8), mRNA.	-0.930519	0.368897	0.797587	0.527789	6.9138	10	0	0	-1.72811	0	-1.06717	-1.183	-1.2986	-1.10236	-0.492725	-0.439265	0.617607	0.239618	0.25955	1.74838	1.14635	0.863999	0.707603
5749	10404036	NM_178196	Hist1h2bg	Mus musculus histone cluster 1, H2bg (Hist1h2bg), mRNA.	-0.930501	0.264127	0.797573	0.577832	7.09481	8	0	0	-1.72807	0	-1.24225	-0.9612	-1.23573	-0.70815	-0.811734	-0.623945	0.382271	1.03297	0.2529	0.602275	0.255264	1.33175	1.72558
886	10354019	NM_028096	2010300C02Rik	Mus musculus RIKEN cDNA 2010300C02 gene (2010300C02Rik), mRNA.	-0.930105	0.335874	0.797233	0.547162	6.96126	10	0	0	-1.72734	0	-0.553322	-0.974542	-0.660741	-0.785633	-1.45859	-1.1478	0.663584	1.41348	-0.00178023	0.440171	0.629331	1.57192	0.863919
9136	10437499	NM_001079814	Glyr1	Mus musculus glyoxylate reductase 1 homolog (Arabidopsis) (Glyr1), transcript variant 1, mRNA.	-0.930088	0.34954	0.797218	0.540036	6.93559	10	0	0	-1.72731	0	-1.41989	-1.00005	-1.01644	-0.952845	-0.336409	-0.854887	0.176318	0.920495	0.00503981	1.09905	0.763404	1.53974	1.07648
13203	10477311	NM_001039939	Asxl1	Mus musculus additional sex combs like 1 (Asxl1), mRNA.	-0.930002	0.444303	0.797145	0.478795	6.7408	10	0	0	-1.72715	0	-1.59198	-1.17114	-1.12853	-0.668084	-0.387504	-0.632775	1.44409	0.523807	0.367174	0.490217	0.349125	1.01135	1.39425
7587	10421227	NM_146055	2610301G19Rik	Mus musculus RIKEN cDNA 2610301G19 gene (2610301G19Rik), mRNA.	-0.929928	0.141756	0.797081	0.614214	7.21826	6	0	0	-1.72701	0	-1.01587	-0.950568	-1.06392	-0.677053	-0.862984	-1.00917	0.30811	1.4532	0.221106	0.0704754	1.59021	1.12093	0.815543
25136	10592058	NM_011654	Tuba1b	Mus musculus tubulin, alpha 1B (Tuba1b), mRNA.	-0.929837	0.474806	0.797003	0.454371	6.66804	10	0	0	-1.72684	0	-1.26863	-0.994572	-1.19885	-1.31237	-0.0610173	-0.743586	0.0984552	1.41696	0.401523	0.989067	1.04683	0.578383	1.0478
14162	10487109	NM_001081091	Cep152	Mus musculus centrosomal protein 152 (Cep152), mRNA.	-0.92964	0.318061	0.796834	0.557404	6.97623	9	0	0	-1.72647	0	-1.48948	-0.952364	-0.832299	-0.981964	-0.528233	-0.793497	1.25309	-0.0452702	0.101953	0.9466	0.888177	1.41761	1.01568
6993	10415293	NM_194346	Rnf31	Mus musculus ring finger protein 31 (Rnf31), mRNA.	-0.929513	0.319331	0.796726	0.55719	6.96954	9	0	0	-1.72624	0	-0.959464	-1.03311	-1.39994	-0.972312	-0.424554	-0.787694	-0.0322096	0.989627	1.61029	0.687516	1.26959	0.743581	0.308685
7167	10416940	NM_001253738	Tpm3	Mus musculus tropomyosin 3, gamma (Tpm3), transcript variant 3, mRNA.	-0.929366	0.182829	0.7966	0.606704	7.15711	7	0	0	-1.72597	0	-1.1553	-0.916119	-1.11819	-0.9118	-0.681526	-0.793264	0.931575	0.431625	0.374126	0.244706	1.84931	0.395807	1.34904
30839	10338713	---	---	---	-0.929053	0.460405	0.796331	0.46945	6.6751	10	0	0	-1.72538	0	-1.09651	-1.57836	-1.02234	-0.851495	-0.865639	-0.159971	1.32607	0.257513	0.345141	0.402389	0.79956	1.3453	1.09833
16183	10506470	NM_001162980	1700024P16Rik	Mus musculus RIKEN cDNA 1700024P16 gene (1700024P16Rik), mRNA.	-0.928947	0.227558	0.79624	0.59518	7.08832	7	0	0	-1.72519	0	-1.05028	-0.943257	-1.16135	-1.02925	-0.507365	-0.882185	0.00547839	0.669144	0.97273	0.774743	1.85207	1.0336	0.265915
12836	10473650	NM_021512	Nup160	Mus musculus nucleoporin 160 (Nup160), mRNA.	-0.928725	0.35609	0.79605	0.540825	6.87615	10	0	0	-1.72478	0	-1.15022	-1.03547	-1.30261	-1.11725	-0.51153	-0.455266	0.328204	0.0623966	0.415285	1.14153	0.838967	1.29556	1.49041
5218	10399036	NM_001040695	Uevld	Mus musculus UEV and lactate/malate dehyrogenase domains (Uevld), mRNA.	-0.928712	0.440442	0.796039	0.486358	6.70731	10	0	0	-1.72475	0	-1.27274	-1.28003	-1.30289	-0.943161	-0.371629	-0.401826	1.01069	0.3931	0.0563501	1.07554	0.468027	1.2597	1.30887
17719	10522004	BC004797	0610040J01Rik	Mus musculus RIKEN cDNA 0610040J01 gene, mRNA (cDNA clone MGC:8120 IMAGE:3589105), complete cds.	-0.928557	0.281029	0.795906	0.576994	6.99805	8	0	0	-1.72446	0	-0.916982	-1.01843	-1.23523	-0.549741	-1.19852	-0.652435	0.126841	1.53833	0.613255	1.07795	1.31214	0.0144182	0.88841
1953	10365260	NM_001042523	Txnrd1	Mus musculus thioredoxin reductase 1 (Txnrd1), transcript variant 1, mRNA.	-0.92848	0.232255	0.79584	0.595024	7.0649	8	0	0	-1.72432	0	-1.07305	-1.00605	-1.14441	-1.05206	-0.54002	-0.755286	0.996893	0.037622	0.874017	0.538193	1.94078	0.737034	0.446335
14600	10491486	NM_029570	Atp11b	Mus musculus ATPase, class VI, type 11B (Atp11b), mRNA.	-0.928321	0.400255	0.795704	0.515797	6.77745	10	0	0	-1.72403	0	-1.18762	-1.33262	-1.22297	-0.938313	-0.35853	-0.529882	0.833928	0.020684	0.201677	1.26341	0.883443	0.944389	1.42239
11028	10455989	ENSMUST00000025506	Rbm22	cdna:novel chromosome:NCBIM37:18:60720390:60732464:1 gene:ENSMUSG00000024604 gene_biotype:protein_coding transcript_biotype:protein_coding	-0.928239	0.407232	0.795633	0.511504	6.76074	10	0	0	-1.72387	0	-1.42697	-1.07237	-0.753772	-1.16254	-0.239655	-0.914126	1.19356	0.134379	0.3121	1.13474	1.16202	0.321182	1.31146
22336	10565250	NM_030705	Mesdc1	Mus musculus mesoderm development candidate 1 (Mesdc1), mRNA.	-0.928107	0.133972	0.79552	0.620751	7.15458	6	0	0	-1.72363	0	-0.991765	-0.994085	-1.03969	-0.978218	-0.891855	-0.673035	-0.0334654	0.53942	0.00434083	1.22334	1.41129	1.32218	1.10154
21291	10556208	NM_020616	D930014E17Rik	Mus musculus RIKEN cDNA D930014E17 gene (D930014E17Rik), mRNA.	-0.928056	0.365215	0.795477	0.537878	6.83637	10	0	0	-1.72353	0	-1.2698	-1.00369	-1.38323	-0.502495	-0.536913	-0.872203	1.32841	0.265279	0.0694592	0.97626	0.401324	1.35585	1.17175
22748	10568221	NM_009266	Sephs2	Mus musculus selenophosphate synthetase 2 (Sephs2), mRNA.	-0.92771	0.452711	0.79518	0.480489	6.64919	10	0	0	-1.72289	0	-0.918438	-1.28626	-1.36016	-1.23076	-0.265147	-0.505502	0.45788	0.284416	0.524723	1.02859	0.448021	1.37145	1.45117
18293	10528200	NM_053263	Hnrnpa3	Mus musculus heterogeneous nuclear ribonucleoprotein A3 (Hnrnpa3), transcript variant c, mRNA.	-0.927692	0.238488	0.795165	0.59525	7.02786	8	0	0	-1.72286	0	-1.01733	-1.20058	-1.17817	-0.768172	-0.627234	-0.774663	0.531895	0.0115575	0.180456	0.690272	1.30148	1.38429	1.4662
24114	10582008	NM_026844	2310061C15Rik	Mus musculus RIKEN cDNA 2310061C15 gene (2310061C15Rik), mRNA.	-0.927462	0.237907	0.794968	0.596108	7.02029	8	0	0	-1.72243	0	-1.08265	-0.952035	-1.26185	-0.833131	-0.560271	-0.874839	-0.0457304	0.982367	0.59988	1.43378	0.080116	1.31074	1.20362
26788	10606376	NM_025921	2610002M06Rik	Mus musculus RIKEN cDNA 2610002M06 gene (2610002M06Rik), mRNA.	-0.927462	0.459229	0.794967	0.476203	6.62746	10	0	0	-1.72243	0	-1.66573	-0.885932	-0.953131	-1.15441	-0.502213	-0.403355	1.07381	0.0442524	0.270748	1.21795	0.777971	0.876512	1.30353
10068	10446402	NM_146081	Ppp4r1	Mus musculus protein phosphatase 4, regulatory subunit 1 (Ppp4r1), transcript variant 1, mRNA.	-0.927453	0.334462	0.794959	0.556169	6.87135	9	0	0	-1.72241	0	-1.23188	-1.0723	-1.25008	-0.978107	-0.49732	-0.535029	0.993508	0.0686388	0.203339	0.690869	1.72758	1.02999	0.850797
6830	10414256	NM_009033	Rbmxl1	Mus musculus RNA binding motif protein, X linked-like-1 (Rbmxl1), transcript variant 1, mRNA.	-0.927428	0.257982	0.794938	0.589209	6.99158	8	0	0	-1.72237	0	-1.15554	-0.779102	-1.11581	-1.13799	-0.508728	-0.867401	0.859011	0.3064	-0.0141345	0.690728	0.620202	1.53653	1.56583
4736	10394344	NR_033599	Gm6682	Mus musculus predicted gene 6682 (Gm6682), non-coding RNA.	-0.927286	0.414942	0.794816	0.509548	6.71409	10	0	0	-1.7221	0	-1.13481	-1.47587	-1.01022	-1.04945	-0.575352	-0.318011	0.347184	1.09256	0.36583	1.15653	1.34767	0.0829344	1.171
10181	10447629	NM_147155	Tagap1	Mus musculus T cell activation GTPase activating protein 1 (Tagap1), mRNA.	-0.927159	0.50415	0.794708	0.437892	6.51951	10	0	0	-1.72187	0	-1.19306	-1.06579	-1.66067	-0.877913	-0.228323	-0.537192	0.626098	0.401594	0.559567	0.843742	0.536328	0.887421	1.7082
15150	10497105	NM_024194	Lrrc40	Mus musculus leucine rich repeat containing 40 (Lrrc40), mRNA.	-0.927058	0.301632	0.794621	0.572789	6.91258	9	0	0	-1.72168	0	-1.13048	-1.10908	-1.22721	-0.990795	-0.50001	-0.604768	0.744734	0.113224	0.29844	1.10879	0.438994	1.09346	1.7647
19276	10538503	NM_001081665	Ccdc129	Mus musculus coiled-coil domain containing 129 (Ccdc129), mRNA.	-0.92691	0.26582	0.794494	0.587817	6.9619	8	0	0	-1.7214	0	-1.17337	-0.798116	-1.33368	-0.678226	-0.716063	-0.862009	-0.00288375	1.53673	0.969652	1.54989	0.503156	0.624312	0.380606
266	10347508	NM_170755	Fam134a	Mus musculus family with sequence similarity 134, member A (Fam134a), mRNA.	-0.92682	0.377095	0.794417	0.534997	6.7727	10	0	0	-1.72124	0	-1.36977	-1.18186	-1.17913	-0.403872	-0.816357	-0.609934	0.437256	1.13669	0.38146	1.44976	0.0676742	1.37558	0.712509
14334	10488929	NM_010579	Eif6	Mus musculus eukaryotic translation initiation factor 6 (Eif6), mRNA.	-0.926717	0.205414	0.794328	0.608208	7.03331	7	0	0	-1.72104	0	-0.965448	-0.873679	-0.719225	-0.711544	-1.04071	-1.24969	1.23254	0.189079	0.101168	0.648398	1.61967	0.404176	1.36527
26074	10600593	NM_053263	Hnrnpa3	Mus musculus heterogeneous nuclear ribonucleoprotein A3 (Hnrnpa3), transcript variant c, mRNA.	-0.926445	0.169326	0.794096	0.618159	7.06142	7	0	0	-1.72054	0	-1.0071	-1.15713	-0.999021	-0.690869	-0.775233	-0.92932	0.352026	0.0889136	0.132299	0.749369	1.33978	1.50609	1.3902
8570	10431486	NM_001170561	Sbf1	Mus musculus SET binding factor 1 (Sbf1), transcript variant 1, mRNA.	-0.926374	0.434407	0.794035	0.498997	6.64539	10	0	0	-1.72041	0	-1.38618	-1.05956	-0.760237	-1.28168	-0.178461	-0.892132	1.42054	0.184882	0.0567323	1.04168	1.06009	1.02641	0.76791
202	10346780	NM_144958	Eif4a1	Mus musculus eukaryotic translation initiation factor 4A1 (Eif4a1), transcript variant 1, mRNA.	-0.926124	0.323784	0.79382	0.565469	6.84416	9	0	0	-1.71994	0	-1.1538	-0.879719	-0.792153	-0.908357	-0.436229	-1.38648	0.464709	0.178442	0.531341	0.791669	1.77549	0.475641	1.33945
12070	10466402	NM_144958	Eif4a1	Mus musculus eukaryotic translation initiation factor 4A1 (Eif4a1), transcript variant 1, mRNA.	-0.926103	0.371405	0.793802	0.540592	6.75962	10	0	0	-1.71991	0	-1.34352	-0.951964	-1.09839	-0.978823	-0.232073	-0.951847	0.427392	0.16199	0.730153	0.768681	1.73844	0.469483	1.26048
29030	10338155	---	---	---	-0.925913	0.410858	0.79364	0.516888	6.6781	10	0	0	-1.71955	0	-1.27621	-1.1895	-1.27968	-0.63575	-0.260829	-0.913509	0.839583	0.69505	0.321286	1.83076	0.264587	0.723296	0.880911
9780	10443527	ENSMUST00000024811	Pim1	cdna:known chromosome:NCBIM37:17:29627757:29632390:1 gene:ENSMUSG00000024014 gene_biotype:protein_coding transcript_biotype:protein_coding	-0.925687	0.577711	0.793446	0.361245	6.30827	8	0	0	-1.71913	0	-0.763868	-0.58937	-1.68714	-1.24932	-0.0522752	-1.21215	1.47039	0.802347	0.786905	0.295481	0.678728	0.585123	0.935141
14494	10490384	NM_001081171	Lama5	Mus musculus laminin, alpha 5 (Lama5), mRNA.	-0.925575	0.263469	0.79335	0.592586	6.91819	8	0	0	-1.71893	0	-1.23143	-1.11645	-0.930512	-1.0495	-0.557799	-0.667773	1.72945	0.211122	0.903255	0.639255	1.43122	0.31499	0.32416
13369	10479136	NM_020580	Th1l	Mus musculus TH1-like homolog (Drosophila) (Th1l), mRNA.	-0.925219	0.355911	0.793045	0.551969	6.75852	10	0	0	-1.71826	0	-1.19871	-0.788821	-0.411423	-0.818094	-0.895603	-1.43866	0.679592	0.773269	0.0352283	0.889711	0.262366	1.64481	1.26634
22646	10567303	NM_009940	Coq7	Mus musculus demethyl-Q 7 (Coq7), mRNA.	-0.925161	0.37014	0.792995	0.544296	6.73107	10	0	0	-1.71816	0	-0.980144	-1.45954	-0.544413	-0.966932	-0.469536	-1.13041	0.131371	0.296958	1.35009	0.654866	0.54467	1.61479	0.958222
24247	10583215	NR_024025	Mtmr2	Mus musculus myotubularin related protein 2 (Mtmr2), transcript variant 2, non-coding RNA.	-0.925124	0.501687	0.792963	0.448123	6.46446	10	0	0	-1.71809	0	-1.33104	-1.38913	-1.0024	-1.17748	-0.114069	-0.536635	1.34514	0.288715	0.218854	0.759897	1.32729	0.684587	0.926256
22922	10569771	ENSMUST00000004683	Mcoln1	cdna:known chromosome:NCBIM37:8:3500457:3515232:1 gene:ENSMUSG00000004567 gene_biotype:protein_coding transcript_biotype:protein_coding	-0.92504	0.261543	0.792892	0.594844	6.9022	8	0	0	-1.71793	0	-1.40372	-0.976082	-0.910691	-0.702973	-0.872578	-0.684192	0.597272	0.426128	0.556327	1.95606	0.332153	0.438413	1.24389
11078	10456579	NM_001039214	Mex3c	Mus musculus mex3 homolog C (C. elegans) (Mex3c), mRNA.	-0.924727	0.304411	0.792624	0.57853	6.82812	9	0	0	-1.71735	0	-1.33568	-1.02648	-1.14145	-0.876	-0.623592	-0.545164	0.510748	0.146761	0.175287	0.675276	1.11663	1.22094	1.70272
11493	10460765	---	---	cdna:genscan chromosome:NCBIM37:4:151531114:151531599:-1 transcript_biotype:protein_coding	-0.924588	0.455	0.792504	0.489772	6.54768	10	0	0	-1.71709	0	-0.35991	-1.28373	-1.45184	-1.06655	-0.391395	-0.994102	0.482415	0.562793	0.211471	1.4973	1.37114	0.943544	0.478868
17720	10522009	NM_025700	Pgm1	Mus musculus phosphoglucomutase 1 (Pgm1), mRNA.	-0.924493	0.38075	0.792423	0.54029	6.69	10	0	0	-1.71692	0	-1.20505	-1.24832	-1.20684	-0.967904	-0.34303	-0.575818	1.37601	0.231763	0.138434	1.10612	1.38923	0.356698	0.948705
23241	10572870	NM_178017	Hmgxb4	Mus musculus HMG box domain containing 4 (Hmgxb4), mRNA.	-0.924481	0.32108	0.792412	0.571712	6.79322	9	0	0	-1.71689	0	-1.196	-1.01084	-1.1816	-1.0636	-0.367875	-0.726974	0.301743	0.0172542	0.32327	0.92825	1.18923	1.37474	1.4124
24008	10580905	NM_153164	Cnot1	Mus musculus CCR4-NOT transcription complex, subunit 1 (Cnot1), transcript variant 1, mRNA.	-0.924331	0.402069	0.792284	0.527789	6.64488	10	0	0	-1.71662	0	-1.28519	-1.06603	-1.2643	-1.07992	-0.325043	-0.525501	0.806114	0.121624	0.24039	1.19156	0.546069	1.05596	1.58426
29138	10338683	---	---	---	-0.924034	0.558424	0.792029	0.392982	6.30689	8	0	0	-1.71606	0	-1.57583	-1.37421	-1.13344	-0.944594	-0.271896	-0.244232	0.541276	0.374101	0.40798	1.48184	0.805126	1.01373	0.920154
26528	10604393	NM_019680	Elf4	Mus musculus E74-like factor 4 (ets domain transcription factor) (Elf4), mRNA.	-0.92393	0.393569	0.79194	0.534393	6.64823	10	0	0	-1.71587	0	-1.25652	-1.02979	-1.33848	-0.993385	-0.621625	-0.303772	1.19485	0.23354	0.719218	1.34991	1.42888	0.150888	0.466292
6170	10407993	NM_001080387	Srsf10	Mus musculus serine/arginine-rich splicing factor 10 (Srsf10), transcript variant 2, mRNA.	-0.923777	0.264625	0.791809	0.59735	6.85432	8	0	0	-1.71559	0	-0.733867	-0.645821	-0.890655	-0.820386	-1.37154	-1.08039	0.448436	0.467872	0.222372	0.62173	0.84204	0.903429	2.03678
30054	10343099	---	---	---	-0.923579	0.47769	0.791639	0.475084	6.47023	10	0	0	-1.71522	0	-1.30025	-1.40701	-1.19213	-0.963851	-0.404006	-0.274228	0.680142	0.1842	0.226943	1.51246	0.85208	0.995335	1.09032
20430	10549057	NM_023042	Recql	Mus musculus RecQ protein-like (Recql), transcript variant 1, mRNA.	-0.923545	0.415447	0.79161	0.521677	6.5946	10	0	0	-1.71516	0	-1.27623	-1.15713	-1.3271	-0.93666	-0.327021	-0.517136	0.441339	0.810872	0.268223	1.14016	0.183575	1.09922	1.59788
24312	10583634	NM_021888	Qtrt1	Mus musculus queuine tRNA-ribosyltransferase 1 (Qtrt1), mRNA.	-0.923386	0.452453	0.791473	0.495912	6.51648	10	0	0	-1.71486	0	-1.02261	-1.30481	-1.57539	-0.608035	-0.445102	-0.584367	0.99343	0.312208	0.129449	0.45674	0.941173	1.34228	1.36503
930	10354542	NM_153556	Pms1	Mus musculus postmeiotic segregation increased 1 (S. cerevisiae) (Pms1), mRNA.	-0.923209	0.124795	0.791322	0.63573	6.98027	6	0	0	-1.71453	0	-1.06044	-0.985742	-0.821753	-1.01765	-0.919938	-0.733727	0.878768	0.372581	-0.0256041	0.643625	0.569882	1.96983	1.13017
21107	10554969	NM_011858	Odz4	Mus musculus odd Oz/ten-m homolog 4 (Drosophila) (Odz4), mRNA.	-0.922764	0.312472	0.790941	0.580766	6.74994	9	0	0	-1.7137	0	-0.363669	-0.879867	-0.856147	-1.12885	-1.05429	-1.25376	0.777673	0.585007	0.299789	1.04321	-0.0318089	1.7306	1.13211
30207	10343906	---	---	---	-0.922724	0.324006	0.790906	0.575596	6.73039	9	0	0	-1.71363	0	-1.29644	-1.0691	-1.21463	-0.848626	-0.574462	-0.53308	0.663195	0.0583087	0.0933151	1.39537	0.686559	1.39887	1.24072
10384	10449575	NM_026845	Ppil1	Mus musculus peptidylprolyl isomerase (cyclophilin)-like 1 (Ppil1), mRNA.	-0.922699	0.171237	0.790885	0.628047	6.92471	7	0	0	-1.71358	0	-1.03495	-0.794244	-0.726256	-0.844705	-1.19171	-0.944321	-0.0043218	0.524785	-0.0131207	1.3469	0.925673	1.38132	1.37496
14330	10488879	NM_008180	Gss	Mus musculus glutathione synthetase (Gss), mRNA.	-0.922684	0.349677	0.790872	0.563058	6.68677	10	0	0	-1.71356	0	-1.22924	-1.07417	-0.659728	-0.37648	-0.917527	-1.27896	0.328815	1.06136	0.562819	0.45767	0.987409	0.275555	1.86248
530	10350504	---	---	cdna:known chromosome:NCBIM37:1:148267564:148268004:1 gene:ENSMUSG00000090323 gene_biotype:protein_coding transcript_biotype:protein_coding	-0.922671	0.51364	0.790861	0.446229	6.36756	10	0	0	-1.71353	0	-0.132251	-1.08772	-1.06621	-1.39121	-0.467307	-1.39132	0.529621	0.89856	0.378137	1.34297	1.4462	0.518708	0.421835
6133	10407511	---	---	cdna:known chromosome:NCBIM37:13:8289092:8289361:-1 gene:ENSMUSG00000072421 gene_biotype:pseudogene transcript_biotype:retrotransposed	-0.922574	0.413458	0.790778	0.526164	6.56842	10	0	0	-1.71335	0	-0.951406	-0.488821	-0.708044	-0.568843	-1.30652	-1.51181	0.307643	1.51442	0.285371	0.286197	0.714644	1.08979	1.33738
1238	10358064	NM_153774	Ipo9	Mus musculus importin 9 (Ipo9), mRNA.	-0.922546	0.247571	0.790754	0.606898	6.83501	8	0	0	-1.7133	0	-1.16611	-0.937751	-1.17987	-0.882679	-0.503184	-0.865683	0.0977101	1.35123	0.306133	0.416698	0.552515	1.74325	1.06774
8571	10431528	NM_178919	Lmf2	Mus musculus lipase maturation factor 2 (Lmf2), mRNA.	-0.922274	0.38749	0.79052	0.543333	6.60736	10	0	0	-1.71279	0	-1.16598	-0.999877	-1.07655	-1.29449	-0.212368	-0.78438	0.0398927	1.22339	0.779827	1.07092	1.30069	0.023429	1.0955
19	10344741	NM_053263	Hnrnpa3	Mus musculus heterogeneous nuclear ribonucleoprotein A3 (Hnrnpa3), transcript variant c, mRNA.	-0.922089	0.217512	0.790362	0.61769	6.85578	7	0	0	-1.71245	0	-0.98192	-1.17216	-1.1666	-0.724314	-0.680745	-0.806793	0.426094	0.0487304	0.149128	0.67292	1.32546	1.37935	1.53085
17046	10515113	NM_053263	Hnrnpa3	Mus musculus heterogeneous nuclear ribonucleoprotein A3 (Hnrnpa3), transcript variant c, mRNA.	-0.922089	0.217512	0.790362	0.61769	6.85578	7	0	0	-1.71245	0	-0.98192	-1.17216	-1.1666	-0.724314	-0.680745	-0.806793	0.426094	0.0487304	0.149128	0.67292	1.32546	1.37935	1.53085
9689	10442549	NM_183149	Zfp598	Mus musculus zinc finger protein 598 (Zfp598), mRNA.	-0.922069	0.467213	0.790344	0.48901	6.44736	10	0	0	-1.71241	0	-1.11208	-1.68493	-1.04422	-0.490572	-0.780861	-0.419747	0.67284	0.201452	0.25174	0.767972	1.43344	1.39842	0.806547
11238	10458283	AK146021	Gm1614	Mus musculus 14 days pregnant adult female amnion cDNA, RIKEN full-length enriched library, clone:I530024I22 product:hypothetical Proline-rich region profile containing protein, full insert sequence.	-0.922033	0.290845	0.790314	0.592173	6.75841	8	0	0	-1.71235	0	-0.867196	-0.597115	-0.943437	-0.643871	-1.37061	-1.10996	0.480059	0.942355	0.862962	1.87245	0.269412	1.01284	0.0921133
9850	10444505	NM_001045864	Rdbp	Mus musculus RD RNA-binding protein (Rdbp), transcript variant 3, mRNA.	-0.921731	0.214481	0.790055	0.619564	6.84692	7	0	0	-1.71179	0	-0.967831	-0.819816	-0.972891	-1.15864	-0.548908	-1.0623	0.00780032	0.757462	0.404834	0.521792	1.70988	1.55078	0.577837
1613	10362102	NR_028580	Gm10825	Mus musculus predicted gene 10825 (Gm10825), non-coding RNA.	-0.921646	0.406329	0.789982	0.53376	6.55334	10	0	0	-1.71163	0	-0.821046	-0.871888	-0.374411	-0.733473	-1.15746	-1.5716	0.664453	1.44598	-0.00136164	1.34245	1.03086	0.780716	0.266775
7525	10420503	NM_001081024	Setdb2	Mus musculus SET domain, bifurcated 2 (Setdb2), mRNA.	-0.92144	0.440358	0.789806	0.511463	6.48228	10	0	0	-1.71125	0	-1.17168	-1.12797	-1.33223	-1.09881	-0.642012	-0.155929	0.832411	0.0777681	0.163481	1.01046	0.760901	1.41084	1.27277
23896	10579830	NM_009033	Rbmxl1	Mus musculus RNA binding motif protein, X linked-like-1 (Rbmxl1), transcript variant 1, mRNA.	-0.921403	0.349403	0.789774	0.56708	6.64631	10	0	0	-1.71118	0	-1.26559	-0.720766	-1.09023	-1.28276	-0.403361	-0.765707	0.878302	0.250667	0.0446117	0.62335	0.708706	1.51074	1.51205
21508	10558723	NM_011875	Psmd13	Mus musculus proteasome (prosome, macropain) 26S subunit, non-ATPase, 13 (Psmd13), mRNA.	-0.92122	0.558592	0.789618	0.404871	6.22962	8	0	0	-1.71084	0	-1.08294	-1.2194	-0.826106	-1.60014	0.0645432	-0.863286	1.26402	0.223376	0.567969	0.770607	1.38266	0.622542	0.696153
13321	10478615	NM_146129	Pcif1	Mus musculus PDX1 C-terminal inhibiting factor 1 (Pcif1), mRNA.	-0.92109	0.259709	0.789506	0.606779	6.77026	8	0	0	-1.7106	0	-0.866305	-0.953019	-0.573548	-1.15253	-0.717421	-1.26371	1.75473	0.54915	0.299723	-0.00742842	1.37623	0.769463	0.784673
3709	10383423	NM_001038230	Anapc11	Mus musculus anaphase promoting complex subunit 11 (Anapc11), transcript variant 1, mRNA.	-0.921074	0.238175	0.789492	0.61414	6.79698	7	0	0	-1.71057	0	-1.04982	-0.655245	-1.23819	-0.671229	-1.08043	-0.831539	0.562217	0.350681	-0.0576877	1.55701	1.39252	1.27205	0.449651
24221	10582981	AK198738	Tfdp1	Mus musculus cDNA, clone:Y1G0129A14, strand:plus, reference:ENSEMBL:Mouse-Transcript-ENST:ENSMUST00000045122, based on BLAT search.	-0.921	0.218519	0.789428	0.620406	6.8175	7	0	0	-1.71043	0	-0.913759	-0.85864	-1.24364	-1.10667	-0.70373	-0.69956	0.279913	0.546856	-0.0302004	1.07652	0.678851	1.1326	1.84146
15329	10498576	NM_016753	Lxn	Mus musculus latexin (Lxn), mRNA.	-0.920901	0.403299	0.789344	0.538046	6.5362	10	0	0	-1.71024	0	-1.20765	-1.1541	-1.36058	-0.893347	-0.299644	-0.610086	1.191	0.0307751	0.213459	1.46247	1.22761	0.639103	0.76098
24754	10587780	NM_011654	Tuba1b	Mus musculus tubulin, alpha 1B (Tuba1b), mRNA.	-0.92089	0.598238	0.789335	0.35613	6.13277	7	0	0	-1.71023	0	-1.41997	-1.12714	-1.28568	-1.23857	0.160847	-0.614828	0.494554	1.07128	0.290764	1.01072	1.1007	0.462574	1.09474
16693	10511879	---	---	cdna:pseudogene chromosome:NCBIM37:4:25795136:25795602:-1 gene:ENSMUSG00000084018 gene_biotype:pseudogene transcript_biotype:transcribed_processed_pseudogene	-0.920741	0.578841	0.789207	0.382578	6.17217	8	0	0	-1.70995	0	-0.668179	-1.27997	-0.907512	-0.589552	-1.85947	-0.219763	0.577242	1.25008	0.30944	0.769862	0.476494	0.811741	1.32959
17564	10520187	NM_009207	Slc4a2	Mus musculus solute carrier family 4 (anion exchanger), member 2 (Slc4a2), transcript variant 1, mRNA.	-0.920668	0.297957	0.789144	0.593168	6.70333	9	0	0	-1.70981	0	-1.44186	-0.976016	-1.01467	-0.753757	-0.615644	-0.722059	0.0324886	0.119769	1.12348	0.418208	1.42641	1.41909	0.984574
11437	10460221	ENSMUST00000072055	Chka	cdna:known chromosome:NCBIM37:19:3851797:3894369:1 gene:ENSMUSG00000024843 gene_biotype:protein_coding transcript_biotype:protein_coding	-0.920646	0.508331	0.789125	0.458881	6.32173	10	0	0	-1.70977	0	-1.27296	-1.256	-1.35037	-1.02663	-0.0731661	-0.544752	0.986662	0.0860629	0.252776	1.04739	1.34493	1.04598	0.760073
3646	10382713	NM_001005608	Itgb4	Mus musculus integrin beta 4 (Itgb4), transcript variant 1, mRNA.	-0.920534	0.542146	0.789029	0.425858	6.24682	9	0	0	-1.70956	0	-1.2903	-1.27824	-1.22025	-1.21581	0.017698	-0.536301	0.919201	0.564674	0.553707	0.993256	1.42886	0.96879	0.0947159
12697	10473008	NM_146130	Hnrnpa3	Mus musculus heterogeneous nuclear ribonucleoprotein A3 (Hnrnpa3), transcript variant b, mRNA.	-0.92044	0.18906	0.788949	0.629938	6.82958	7	0	0	-1.70939	0	-1.03499	-1.17394	-0.978426	-0.643287	-0.775024	-0.916974	0.414798	0.011499	0.137978	0.699575	1.35377	1.50306	1.40196
16719	10512061	NM_027139	Taf9	Mus musculus TAF9 RNA polymerase II, TATA box binding protein (TBP)-associated factor (Taf9), transcript variant 1, mRNA.	-0.920421	0.261645	0.788932	0.60797	6.74556	8	0	0	-1.70935	0	-1.01477	-0.897243	-0.893142	-1.23158	-0.44942	-1.03637	1.21524	0.124099	0.00588022	0.31262	1.34614	1.23625	1.2823
2517	10371159	ENSMUST00000140901	Fzr1	cdna:known chromosome:NCBIM37:10:80828967:80841261:-1 gene:ENSMUSG00000020235 gene_biotype:protein_coding transcript_biotype:protein_coding	-0.920347	0.269406	0.788869	0.605347	6.73285	8	0	0	-1.70922	0	-0.852622	-0.749131	-0.51899	-1.01646	-1.11962	-1.26526	-0.0375724	1.20876	0.379066	0.781734	0.275302	1.37444	1.54035
23151	10571911	BC042740	2700029M09Rik	Mus musculus RIKEN cDNA 2700029M09 gene, mRNA (cDNA clone MGC:51389 IMAGE:5024951), complete cds.	-0.920279	0.355999	0.788811	0.567051	6.59995	10	0	0	-1.70909	0	-1.16432	-0.958786	-1.33364	-1.01583	-0.325252	-0.72385	0.345637	0.267546	0.0344154	0.983988	1.14378	1.52321	1.2231
3287	10378914	NM_011586	Myo18a	Mus musculus myosin XVIIIA (Myo18a), mRNA.	-0.920091	0.26667	0.788649	0.607078	6.72809	8	0	0	-1.70874	0	-1.00374	-1.17139	-0.875409	-1.21128	-0.507756	-0.750961	0.577873	0.646543	0.516289	1.02191	1.97894	0.0135897	0.765403
23500	10575775	NM_001163262	4933407C03Rik	Mus musculus RIKEN cDNA 4933407C03 gene (4933407C03Rik), transcript variant 1, mRNA.	-0.919994	0.406856	0.788567	0.538693	6.50229	10	0	0	-1.70856	0	-1.02409	-1.64659	-0.845451	-0.886273	-0.661831	-0.455732	0.693963	0.0186803	0.629102	1.37581	1.58331	0.801198	0.417896
23701	10577866	ENSMUST00000068892	Ash2l	cdna:known chromosome:NCBIM37:8:26926663:26951251:-1 gene:ENSMUSG00000031575 gene_biotype:protein_coding transcript_biotype:protein_coding	-0.919987	0.277235	0.78856	0.603416	6.71047	8	0	0	-1.70855	0	-1.27591	-1.0184	-1.01414	-0.432997	-0.892196	-0.88628	0.753986	0.461524	0.367695	0.0460222	0.770052	1.28062	1.84002
7503	10420320	NM_001014996	Cenpj	Mus musculus centromere protein J (Cenpj), mRNA.	-0.919981	0.243322	0.788555	0.615501	6.75422	8	0	0	-1.70854	0	-1.17667	-0.842977	-1.06068	-1.0841	-0.504373	-0.851086	0.255176	0.296188	0.31078	1.05848	0.410024	1.56109	1.62814
4916	10396108	NM_007481	Arf6	Mus musculus ADP-ribosylation factor 6 (Arf6), mRNA.	-0.919953	0.47913	0.788531	0.486795	6.36213	10	0	0	-1.70848	0	-1.43696	-0.983298	-1.38794	-1.00948	-0.318334	-0.383715	0.52853	0.253807	1.31139	1.03372	1.39042	0.822704	0.179148
16190	10506583	NM_177667	Ttc22	Mus musculus tetratricopeptide repeat domain 22 (Ttc22), mRNA.	-0.919779	0.354151	0.788382	0.569518	6.58743	10	0	0	-1.70816	0	-1.1671	-0.842151	-1.43669	-0.959521	-0.673533	-0.439673	0.632791	0.17921	0.1038	1.30467	1.67833	0.916368	0.703502
17728	10522149	NM_016786	Ube2k	Mus musculus ubiquitin-conjugating enzyme E2K (Ube2k), mRNA.	-0.919604	0.308849	0.788232	0.59159	6.65304	9	0	0	-1.70784	0	-0.980179	-1.40324	-1.12075	-0.632382	-0.766223	-0.614844	1.15959	-0.00410096	0.0212305	0.691875	1.1994	0.919583	1.53004
17242	10516910	NM_175306	Phactr4	Mus musculus phosphatase and actin regulator 4 (Phactr4), transcript variant 1, mRNA.	-0.919431	0.29176	0.788084	0.599267	6.67231	8	0	0	-1.70752	0	-1.26299	-0.986429	-1.09498	-1.01507	-0.702541	-0.454576	0.763647	1.02039	-0.0268792	0.716394	0.0915673	1.47553	1.47594
10901	10454782	ENSMUST00000064795	Egr1	cdna:known chromosome:NCBIM37:18:35019477:35024638:1 gene:ENSMUSG00000038418 gene_biotype:protein_coding transcript_biotype:protein_coding	-0.919202	0.509144	0.787887	0.463484	6.27994	10	0	0	-1.70709	0	-0.814595	-1.17105	-1.46749	-0.671122	-0.0792406	-1.31171	0.333357	0.527336	0.790105	1.04898	0.276805	1.6021	0.936527
10274	10448292	NM_001008425	Thoc6	Mus musculus THO complex 6 homolog (Drosophila) (Thoc6), mRNA.	-0.91912	0.367824	0.787817	0.564246	6.54431	10	0	0	-1.70694	0	-0.803937	-0.622009	-0.912268	-0.736266	-0.79571	-1.64453	0.261356	0.622447	0.34567	0.422539	0.791343	1.81692	1.25444
3647	10382756	NM_172569	Unk	Mus musculus unkempt homolog (Drosophila) (Unk), mRNA.	-0.919115	0.340159	0.787813	0.578544	6.58948	9	0	0	-1.70693	0	-0.809412	-1.02462	-1.03749	-1.16176	-0.283089	-1.19832	0.0257675	1.45157	0.849947	1.08381	0.0663079	1.38496	0.652319
14661	10492045	NM_053263	Hnrnpa3	Mus musculus heterogeneous nuclear ribonucleoprotein A3 (Hnrnpa3), transcript variant c, mRNA.	-0.918944	0.172217	0.787666	0.63797	6.79461	7	0	0	-1.70661	0	-0.979395	-1.14444	-0.998314	-0.647741	-0.802917	-0.940857	0.299414	0.125282	0.100412	0.676428	1.34136	1.48735	1.48341
1903	10364752	NM_133188	Dazap1	Mus musculus DAZ associated protein 1 (Dazap1), transcript variant 1, mRNA.	-0.918659	0.271803	0.787422	0.609204	6.67481	8	0	0	-1.70608	0	-0.878187	-1.04005	-0.705509	-0.544904	-1.31285	-1.03045	0.0534003	0.279098	0.163221	0.973523	1.16637	1.35218	1.52416
1321	10358978	NM_010500	Ier5	Mus musculus immediate early response 5 (Ier5), mRNA.	-0.918649	0.527826	0.787413	0.447842	6.22613	9	0	0	-1.70606	0	-1.14953	-1.04718	-1.46711	-1.20512	0.015478	-0.658439	0.372471	0.543405	0.183404	0.914089	1.21994	1.41864	0.859946
19688	10542340	NM_028982	8430419L09Rik	Mus musculus RIKEN cDNA 8430419L09 gene (8430419L09Rik), mRNA.	-0.918584	0.346631	0.787357	0.576908	6.56269	9	0	0	-1.70594	0	-1.26145	-0.930345	-1.10254	-1.04017	-0.259457	-0.917544	0.636431	0.278312	0.503719	1.62923	1.54609	0.199682	0.718046
3680	10383055	NM_007623	Cbx2	Mus musculus chromobox 2 (Cbx2), mRNA.	-0.91852	0.460185	0.787303	0.506647	6.35877	10	0	0	-1.70582	0	-0.572039	-0.530079	-0.589986	-0.846046	-1.60805	-1.36492	0.864878	0.643457	0.0464043	1.35458	0.436302	0.667466	1.49804
13701	10483023	ENSMUST00000028347	Rbms1	cdna:known chromosome:NCBIM37:2:60588250:60801249:-1 gene:ENSMUSG00000026970 gene_biotype:protein_coding transcript_biotype:protein_coding	-0.918507	0.3747	0.787292	0.562326	6.51406	10	0	0	-1.7058	0	-1.11562	-1.2284	-0.917759	-1.2017	-0.227723	-0.819846	1.71468	0.414923	0.510782	0.630329	1.39289	0.712112	0.135326
6989	10415248	NM_028994	Pck2	Mus musculus phosphoenolpyruvate carboxykinase 2 (mitochondrial) (Pck2), nuclear gene encoding mitochondrial protein, mRNA.	-0.918482	0.276706	0.78727	0.607858	6.66261	8	0	0	-1.70575	0	-1.25725	-0.870798	-1.16785	-0.740285	-0.506876	-0.967836	1.03424	1.08373	0.643615	0.911737	-0.0677653	1.74202	0.163322
23211	10572605	NM_172756	Ankle1	Mus musculus ankyrin repeat and LEM domain containing 1 (Ankle1), mRNA.	-0.918465	0.232627	0.787256	0.623104	6.71706	7	0	0	-1.70572	0	-0.920407	-0.814871	-0.856587	-1.01192	-1.30338	-0.603631	-0.0101144	0.903215	0.207452	1.07088	0.320835	1.55144	1.46708
4535	10391914	NM_183288	Arhgap27	Mus musculus Rho GTPase activating protein 27 (Arhgap27), transcript variant 3, mRNA.	-0.918462	0.379111	0.787253	0.559994	6.50519	10	0	0	-1.70572	0	-1.15076	-0.774002	-1.31884	-1.25868	-0.393357	-0.615135	1.24046	0.517389	0.34002	0.565607	1.54268	1.26349	0.0411205
11398	10459844	NM_146089	Haus1	Mus musculus HAUS augmin-like complex, subunit 1 (Haus1), mRNA.	-0.918323	0.387574	0.787134	0.555573	6.48645	10	0	0	-1.70546	0	-1.11942	-1.07119	-1.42772	-0.90671	-0.312303	-0.672595	0.75665	0.068357	0.297925	0.961268	0.474808	1.57447	1.37646
16406	10508805	ENSMUST00000084241	Wasf2	cdna:known chromosome:NCBIM37:4:132686420:132755671:1 gene:ENSMUSG00000028868 gene_biotype:protein_coding transcript_biotype:protein_coding	-0.918323	0.433689	0.787134	0.526406	6.40345	10	0	0	-1.70546	0	-1.32887	-1.31957	-1.03729	-0.885901	-0.159176	-0.779126	0.696515	0.251531	0.157617	0.583577	1.27077	0.943337	1.60659
26263	10602173	NR_002883	Gm5643	Mus musculus predicted gene 5643 (Gm5643), non-coding RNA.	-0.918303	0.316801	0.787117	0.591839	6.60014	9	0	0	-1.70542	0	-1.13913	-1.01546	-0.791479	-0.70917	-0.489325	-1.36526	-0.00535433	0.239792	0.651659	0.684504	0.883229	1.38988	1.6661
10772	10453399	NM_030133	Srbd1	Mus musculus S1 RNA binding domain 1 (Srbd1), mRNA.	-0.918129	0.341811	0.786967	0.580637	6.55635	9	0	0	-1.7051	0	-1.24095	-1.22036	-1.20431	-0.614404	-0.49203	-0.736718	0.811419	-0.0202015	0.274061	0.819293	0.59988	1.61163	1.41269
6390	10409689	ENSMUST00000043269	Hnrnpk	cdna:known chromosome:NCBIM37:13:58492600:58503863:-1 gene:ENSMUSG00000021546 gene_biotype:protein_coding transcript_biotype:protein_coding	-0.917449	0.378048	0.786385	0.563665	6.47661	10	0	0	-1.70383	0	-1.326	-1.04078	-0.897356	-0.978208	-0.204283	-1.05806	1.41134	0.0447407	0.00964835	0.697516	1.1569	0.969657	1.2149
4542	10391963	NM_008740	Nsf	Mus musculus N-ethylmaleimide sensitive fusion protein (Nsf), mRNA.	-0.917265	0.317155	0.786227	0.594663	6.56735	9	0	0	-1.70349	0	-1.23793	-0.91863	-1.33439	-0.838967	-0.558296	-0.615385	0.304975	0.608419	0.111307	0.801092	1.00947	1.94755	0.720782
9994	10445678	BC006605	AI661453	Mus musculus expressed sequence AI661453, mRNA (cDNA clone MGC:7083 IMAGE:3157220), complete cds.	-0.917026	0.38742	0.786023	0.559625	6.44818	10	0	0	-1.70305	0	-1.17752	-1.36187	-1.13655	-0.903327	-0.564508	-0.358385	0.63447	0.391735	0.106228	0.460738	0.848365	1.63254	1.42809
3088	10376690	NM_008502	Llgl1	Mus musculus lethal giant larvae homolog 1 (Drosophila) (Llgl1), transcript variant 2, mRNA.	-0.91686	0.418523	0.78588	0.541164	6.38889	10	0	0	-1.70274	0	-1.08758	-1.30466	-1.16148	-1.17234	-0.313978	-0.46112	0.996016	0.0101465	0.157882	1.15036	0.636385	1.0717	1.47868
25333	10593913	NM_028820	1700017B05Rik	Mus musculus RIKEN cDNA 1700017B05 gene (1700017B05Rik), mRNA.	-0.916497	0.247548	0.785569	0.623693	6.63616	8	0	0	-1.70207	0	-0.611045	-0.872598	-1.28962	-0.938714	-0.705887	-1.08112	1.34355	-0.0980803	0.904299	0.396751	1.45436	1.30877	0.18934
15419	10499504	NM_013604	Mtx1	Mus musculus metaxin 1 (Mtx1), nuclear gene encoding mitochondrial protein, transcript variant 1, mRNA.	-0.916426	0.451257	0.785508	0.520201	6.31659	10	0	0	-1.70193	0	-0.676126	-0.63563	-0.810061	-1.01938	-0.577805	-1.77956	1.09186	0.196902	1.03856	0.108172	0.763499	0.705569	1.594
9972	10445442	NM_019581	Gtpbp2	Mus musculus GTP binding protein 2 (Gtpbp2), transcript variant 1, mRNA.	-0.916385	0.241893	0.785473	0.625844	6.63926	7	0	0	-1.70186	0	-1.0369	-0.821726	-0.773764	-0.551869	-1.1619	-1.15215	0.890496	0.70987	-0.0660272	0.078704	0.859301	1.6626	1.36337
11860	10464409	NM_178421	Nanos1	Mus musculus nanos homolog 1 (Drosophila) (Nanos1), mRNA.	-0.916375	0.339774	0.785464	0.586747	6.50606	9	0	0	-1.70184	0	-0.829778	-0.732106	-0.83418	-0.796503	-1.60163	-0.704053	1.52922	0.596399	-0.0287728	1.43006	1.10618	0.280417	0.584741
20551	10550076	NM_011588	Trim28	Mus musculus tripartite motif-containing 28 (Trim28), mRNA.	-0.916182	0.320985	0.785299	0.59605	6.52846	9	0	0	-1.70148	0	-1.32257	-0.702992	-1.03788	-1.2142	-0.528792	-0.690661	0.263222	1.05341	0.209398	0.692092	0.213102	1.50532	1.56055
13278	10478169	NM_145742	Dhx35	Mus musculus DEAH (Asp-Glu-Ala-His) box polypeptide 35 (Dhx35), mRNA.	-0.916152	0.121671	0.785273	0.654903	6.73926	6	0	0	-1.70143	0	-0.876476	-1.00228	-0.929047	-1.00564	-0.690447	-0.993018	0.867331	0.257027	0.212586	0.894384	1.7416	1.48035	0.0436303
25713	10597969	NR_002885	Gm10052	Mus musculus predicted pseudogene 10052 (Gm10052), non-coding RNA.	-0.91597	0.37844	0.785117	0.567897	6.43217	10	0	0	-1.70109	0	-1.2909	-1.01304	-0.741648	-0.717414	-0.370744	-1.36207	0.0793303	0.233329	0.598252	0.650506	0.904943	1.52833	1.50113
20110	10545921	NM_010751	Mxd1	Mus musculus MAX dimerization protein 1 (Mxd1), mRNA.	-0.915454	0.215614	0.784675	0.636292	6.63857	7	0	0	-1.70013	0	-0.799304	-0.933728	-0.903832	-0.641258	-1.29397	-0.920629	0.273152	0.430976	0.408718	1.12856	0.558238	0.604861	2.08823
7958	10425341	NM_025609	Tab1	Mus musculus TGF-beta activated kinase 1/MAP3K7 binding protein 1 (Tab1), mRNA.	-0.915309	0.280728	0.784551	0.615166	6.55754	8	0	0	-1.69986	0	-1.24765	-0.840585	-0.676116	-1.25116	-0.888566	-0.587773	0.177402	0.478759	0.585658	1.27359	0.0493824	1.64686	1.28021
23778	10578615	NM_023503	Ing2	Mus musculus inhibitor of growth family, member 2 (Ing2), mRNA.	-0.91492	0.255912	0.784218	0.625179	6.57659	8	0	0	-1.69914	0	-0.904137	-0.955055	-1.34821	-0.738533	-0.953329	-0.590262	1.10534	0.145767	0.0334458	1.19834	0.247391	1.60546	1.15379
24311	10583610	NM_010561	Ilf3	Mus musculus interleukin enhancer binding factor 3 (Ilf3), transcript variant 1, mRNA.	-0.914913	0.221029	0.784211	0.636191	6.61572	7	0	0	-1.69912	0	-0.989361	-0.868118	-1.08535	-0.779375	-1.18954	-0.577727	0.383737	0.707654	0.0998654	0.960267	0.137792	1.68293	1.51723
9800	10443869	NM_024442	Cyp4f16	Mus musculus cytochrome P450, family 4, subfamily f, polypeptide 16 (Cyp4f16), mRNA.	-0.914878	0.475406	0.784181	0.507173	6.22843	10	0	0	-1.69906	0	-1.35477	-1.32515	-0.182907	-0.783637	-1.24938	-0.593426	1.24665	0.179646	0.700499	1.4406	1.1745	0.509252	0.23812
1380	10359689	NM_009721	Atp1b1	Mus musculus ATPase, Na+/K+ transporting, beta 1 polypeptide (Atp1b1), mRNA.	-0.914666	0.404533	0.783999	0.556702	6.3505	10	0	0	-1.69867	0	-1.41456	-0.969455	-1.21438	-1.01733	-0.495242	-0.377029	1.21888	-0.0238442	1.23784	0.154427	1.4231	0.776867	0.700725
2898	10375127	AK006938	1700072H12Rik	Mus musculus adult male testis cDNA, RIKEN full-length enriched library, clone:1700072H12 product:hypothetical protein, full insert sequence.	-0.914476	0.214707	0.783837	0.639154	6.60853	7	0	0	-1.69831	0	-0.68522	-1.1109	-1.15281	-0.947785	-0.632397	-0.957744	1.73817	0.131433	0.0791451	1.00704	0.878828	1.35325	0.299
22883	10569335	NR_001592	H19	Mus musculus H19 fetal liver mRNA (H19), non-coding RNA.	-0.914392	0.200668	0.783764	0.643167	6.61979	7	0	0	-1.69816	0	-1.13458	-1.04342	-1.0959	-0.802881	-0.66631	-0.743264	0.932103	0.247108	0.132191	0.976096	0.105171	1.75345	1.34023
24307	10583548	---	---	cdna:known chromosome:NCBIM37:9:20896199:20932837:1 gene:ENSMUSG00000086016 gene_biotype:antisense transcript_biotype:antisense	-0.914391	0.14431	0.783764	0.655643	6.66684	6	0	0	-1.69816	0	-0.94257	-0.836718	-0.697325	-0.927997	-0.945991	-1.13575	0.556872	1.27679	0.294923	0.656683	0.05246	0.649639	1.99898
4525	10391768	NM_011431	Eftud2	Mus musculus elongation factor Tu GTP binding domain containing 2 (Eftud2), transcript variant 1, mRNA.	-0.914336	0.393654	0.783717	0.564157	6.35949	10	0	0	-1.69805	0	-1.07514	-0.696218	-0.688768	-0.36464	-1.30109	-1.36016	0.431602	0.869875	0.0378822	0.386964	0.906508	1.76043	1.09276
19522	10540795	NM_001113553	Irak2	Mus musculus interleukin-1 receptor-associated kinase 2 (Irak2), transcript variant 2, mRNA.	-0.913788	0.39864	0.783247	0.562886	6.33555	10	0	0	-1.69704	0	-1.10127	-1.05944	-1.49278	-0.817871	-0.679868	-0.3315	1.55955	0.395288	0.116736	1.52646	0.428571	0.826522	0.629599
8513	10430804	NM_134095	Pppde2	Mus musculus PPPDE peptidase domain containing 2 (Pppde2), mRNA.	-0.913779	0.520445	0.783239	0.472844	6.11229	10	0	0	-1.69702	0	-1.20543	-1.13794	-1.48613	-1.12587	-0.287068	-0.240229	1.56484	0.202817	1.07742	0.553385	0.624683	1.06403	0.395499
14175	10487359	NM_001163527	Itpripl1	Mus musculus inositol 1,4,5-triphosphate receptor interacting protein-like 1 (Itpripl1), transcript variant 1, mRNA.	-0.913764	0.425274	0.783226	0.546476	6.28923	10	0	0	-1.69699	0	-1.00867	-0.547235	-1.49363	-1.25425	-0.367651	-0.811149	1.33282	0.0208374	0.31357	0.749792	1.5383	1.0044	0.522872
14510	10490653	NM_198169	Gmeb2	Mus musculus glucocorticoid modulatory element binding protein 2 (Gmeb2), mRNA.	-0.913406	0.268083	0.78292	0.62504	6.51524	8	0	0	-1.69633	0	-1.12826	-1.00146	-1.19457	-0.908092	-0.452473	-0.79558	0.973195	0.00347307	-0.0159629	0.475855	1.29726	1.42872	1.3179
21105	10554965	---	---	cdna:genscan chromosome:NCBIM37:7:102595426:102611622:1 transcript_biotype:protein_coding	-0.913334	0.386219	0.782858	0.571406	6.3432	10	0	0	-1.69619	0	-0.26577	-1.06322	-1.00072	-0.67244	-1.12419	-1.35367	0.183366	0.198122	0.640279	0.706267	0.848915	1.85953	1.04353
9345	10439542	NM_001007460	Zdhhc23	Mus musculus zinc finger, DHHC domain containing 23 (Zdhhc23), mRNA.	-0.913309	0.518172	0.782836	0.476596	6.10458	10	0	0	-1.69614	0	-1.28731	-1.06149	-1.43693	-1.06501	-0.603076	-0.026044	0.604156	0.243271	0.718768	1.44106	1.35881	0.266547	0.847244
25376	10594404	NM_016769	Smad3	Mus musculus SMAD family member 3 (Smad3), mRNA.	-0.913197	0.337147	0.782741	0.597118	6.41553	9	0	0	-1.69594	0	-1.01837	-1.12346	-0.307804	-0.912755	-1.28687	-0.829923	0.638792	0.055377	0.0099952	1.00353	1.34309	0.855495	1.5729
194	10346634	ENSMUST00000027174	Nop58	cdna:known chromosome:NCBIM37:1:59741853:59768968:1 gene:ENSMUSG00000026020 gene_biotype:protein_coding transcript_biotype:protein_coding	-0.91303	0.513152	0.782597	0.482084	6.10712	10	0	0	-1.69563	0	-1.1663	-1.35402	-1.24294	-1.19469	-0.167262	-0.352968	0.853379	0.11739	0.234517	0.660429	0.978891	1.21107	1.4225
3290	10379006	NM_183286	Dhrs13	Mus musculus dehydrogenase/reductase (SDR family) member 13 (Dhrs13), mRNA.	-0.912821	0.205996	0.782418	0.645902	6.56542	7	0	0	-1.69524	0	-0.739785	-0.886407	-0.82189	-1.23851	-0.712727	-1.0776	0.47428	0.0811315	-0.0534797	1.07537	0.846226	1.42703	1.62636
870	10353794	NM_001160235	Fam168b	Mus musculus family with sequence similarity 168, member B (Fam168b), transcript variant 1, mRNA.	-0.912726	0.407847	0.782337	0.560586	6.29023	10	0	0	-1.69506	0	-1.43576	-0.401907	-1.13145	-0.755642	-1.20893	-0.542668	0.408991	1.48065	0.865763	0.340738	0.528917	1.6153	0.235995
25459	10595171	BC052196	E330016A19Rik	Mus musculus RIKEN cDNA E330016A19 gene, mRNA (cDNA clone MGC:59605 IMAGE:6510706), complete cds.	-0.912546	0.130947	0.782182	0.662717	6.6168	6	0	0	-1.69473	0	-1.02387	-0.951443	-1.01818	-0.987934	-0.7549	-0.738949	0.728095	-0.0390556	-0.0758449	1.3739	0.623254	1.41697	1.44795
19341	10538939	NM_010121	Eif2ak3	Mus musculus eukaryotic translation initiation factor 2 alpha kinase 3 (Eif2ak3), mRNA.	-0.912469	0.406434	0.782116	0.562215	6.28544	10	0	0	-1.69459	0	-1.23675	-0.868137	-1.49001	-0.922838	-0.544038	-0.413046	1.05669	0.168986	0.197519	1.57977	0.26904	1.09607	1.10674
27478	10407325	---	---	---	-0.912273	0.546007	0.781949	0.453838	6.02352	9	0	0	-1.69422	0	-0.697261	-0.867386	-0.231867	-0.644266	-1.21845	-1.81441	1.54155	0.339525	0.449511	1.27121	0.536743	0.783501	0.551601
8476	10430438	NM_144849	Ankrd54	Mus musculus ankyrin repeat domain 54 (Ankrd54), mRNA.	-0.911879	0.425589	0.78161	0.552092	6.23672	10	0	0	-1.69349	0	-0.82082	-1.08854	-0.825665	-0.852063	-1.59527	-0.28891	1.00983	0.476704	0.0563433	0.755938	0.284335	1.57084	1.31727
4066	10386909	NM_028448	Cenpv	Mus musculus centromere protein V (Cenpv), mRNA.	-0.911875	0.493133	0.781607	0.503098	6.11528	10	0	0	-1.69348	0	-1.12073	-1.2891	-1.37709	-1.10169	-0.351831	-0.230795	0.31119	0.454447	1.0557	1.72938	0.916911	0.356841	0.646774
4725	10394173	ENSMUST00000153102	Asxl2	cdna:known chromosome:NCBIM37:12:3426901:3502466:1 gene:ENSMUSG00000037486 gene_biotype:protein_coding transcript_biotype:protein_coding	-0.911658	0.456413	0.781421	0.531881	6.17679	10	0	0	-1.69308	0	-1.28406	-0.999825	-1.42944	-1.01222	-0.504249	-0.240154	0.717383	0.333564	0.580049	0.930701	0.278282	0.763917	1.86605
26691	10605571	NM_212444	Gyk	Mus musculus glycerol kinase (Gyk), transcript variant 2, mRNA.	-0.911624	0.263568	0.781392	0.631439	6.46692	8	0	0	-1.69302	0	-0.909215	-0.973542	-1.23561	-1.07772	-0.809919	-0.463737	0.376538	0.144378	0.586965	1.01275	2.03669	0.407066	0.905353
21778	10560818	NM_019940	Zfp111	Mus musculus zinc finger protein 111 (Zfp111), mRNA.	-0.911557	0.310796	0.781334	0.613465	6.40486	9	0	0	-1.69289	0	-1.13429	-1.05943	-1.10875	-1.1206	-0.639701	-0.406576	0.00230298	0.680199	0.497729	1.09138	0.169127	1.42749	1.60111
9162	10437712	NM_145931	Zc3h7a	Mus musculus zinc finger CCCH type containing 7 A (Zc3h7a), transcript variant 1, mRNA.	-0.911386	0.458602	0.781188	0.531177	6.16563	10	0	0	-1.69257	0	-1.36588	-1.0997	-1.33613	-0.950301	-0.270165	-0.446131	0.694418	0.123419	0.138261	0.779277	1.0741	1.6055	1.05334
25528	10595924	NM_029094	Pik3cb	Mus musculus phosphatidylinositol 3-kinase, catalytic, beta polypeptide (Pik3cb), mRNA.	-0.91113	0.284084	0.780969	0.625319	6.42724	8	0	0	-1.6921	0	-0.610476	-0.972327	-1.35385	-0.966224	-0.585772	-0.978138	1.3316	0.0143097	0.374907	0.34645	0.435981	1.47097	1.49256
3729	10383671	NM_007879	Drg1	Mus musculus developmentally regulated GTP binding protein 1 (Drg1), mRNA.	-0.911124	0.341968	0.780963	0.600706	6.3485	9	0	0	-1.69209	0	-1.22165	-0.982276	-1.01504	-0.309609	-0.741177	-1.19699	0.0420543	0.120239	0.750972	1.59715	0.521066	1.40009	1.03517
12517	10471424	NM_153560	Fam102a	Mus musculus family with sequence similarity 102, member A (Fam102a), mRNA.	-0.911033	0.422388	0.780885	0.556715	6.21914	10	0	0	-1.69192	0	-1.09187	-1.55504	-1.13051	-0.70996	-0.474094	-0.504719	0.224747	0.357845	0.0925024	1.54134	1.0888	0.930733	1.23023
35134	10344117	---	---	---	-0.91089	0.470428	0.780763	0.524091	6.13133	10	0	0	-1.69165	0	-1.36582	-1.44744	-1.05676	-0.857452	-0.361816	-0.376053	1.49631	0.0243272	0.388187	1.16149	0.907495	0.393081	1.09445
14752	10492997	NM_001083318	Etv3	Mus musculus ets variant gene 3 (Etv3), transcript variant 1, mRNA.	-0.910753	0.177417	0.780645	0.658274	6.52715	6	0	0	-1.6914	0	-1.08928	-0.738386	-1.15464	-0.77849	-0.774747	-0.928974	0.75782	0.214668	0.0934987	0.297555	1.34934	0.855394	1.89624
6735	10413316	---	---	cdna:known chromosome:NCBIM37:14:27512898:27544126:1 gene:ENSMUSG00000021879 gene_biotype:protein_coding transcript_biotype:protein_coding	-0.910731	0.326219	0.780627	0.609052	6.35972	9	0	0	-1.69136	0	-0.685176	-1.28163	-0.921847	-1.21766	-0.412614	-0.945467	0.102443	1.14415	0.504331	1.48063	0.102443	1.53708	0.593314
13071	10476136	NM_030559	Vps16	Mus musculus vacuolar protein sorting 16 (yeast) (Vps16), mRNA.	-0.910618	0.362459	0.780529	0.592057	6.30376	10	0	0	-1.69115	0	-1.31309	-0.839173	-1.26237	-0.69108	-0.354519	-1.00347	1.53945	0.284665	0.0601943	0.524934	0.6863	1.60984	0.758317
7144	10416777	NM_009769	Klf5	Mus musculus Kruppel-like factor 5 (Klf5), mRNA.	-0.910568	0.456711	0.780487	0.535125	6.14736	10	0	0	-1.69105	0	-1.19374	-1.33977	-1.0804	-0.347491	-1.18787	-0.314136	0.0612755	0.585672	0.286476	0.949646	1.35492	0.700668	1.52475
23612	10576911	ENSMUST00000001319	Efnb2	cdna:known chromosome:NCBIM37:8:8617434:8660773:-1 gene:ENSMUSG00000001300 gene_biotype:protein_coding transcript_biotype:protein_coding	-0.910378	0.367749	0.780324	0.59002	6.28901	10	0	0	-1.6907	0	-1.31951	-1.15864	-1.09438	-0.972307	-0.485803	-0.431617	0.311731	0.332956	0.246374	0.617653	0.746745	1.57684	1.62997
20126	10546088	NM_198622	H1fx	Mus musculus H1 histone family, member X (H1fx), mRNA.	-0.910209	0.143941	0.780179	0.666428	6.53543	6	0	0	-1.69039	0	-0.776393	-0.889298	-0.952509	-0.742786	-0.959931	-1.14034	0.585385	0.934575	0.0604265	1.14424	0.475067	0.232602	2.02896
3844	10384780	NM_025923	Fancl	Mus musculus Fanconi anemia, complementation group L (Fancl), mRNA.	-0.910018	0.212777	0.780015	0.651392	6.47329	7	0	0	-1.69003	0	-0.594412	-0.895545	-1.21121	-0.867646	-1.07115	-0.820144	1.84752	0.765448	-0.115034	1.03395	0.13526	1.11745	0.675513
1684	10362674	NR_002842	Rnu3a	Mus musculus U3A small nuclear RNA (Rnu3a), small nuclear RNA.	-0.910011	0.265185	0.780009	0.635186	6.41718	8	0	0	-1.69002	0	-1.24045	-1.04506	-1.11691	-0.824922	-0.587401	-0.645319	1.60649	0.017824	0.77761	-0.0856396	0.917055	0.824932	1.40179
10317	10448811	NM_020608	Cramp1l	Mus musculus Crm, cramped-like (Drosophila) (Cramp1l), mRNA.	-0.909645	0.449944	0.779696	0.542763	6.1349	10	0	0	-1.68934	0	-1.42359	-1.11788	-1.23598	-0.803944	-0.705297	-0.171184	0.891913	0.00569752	0.00569752	1.28785	1.04661	1.17742	1.04268
11870	10464529	ENSMUST00000001801	Tcirg1	cdna:known chromosome:NCBIM37:19:3896050:3907133:-1 gene:ENSMUSG00000001750 gene_biotype:protein_coding transcript_biotype:protein_coding	-0.909532	0.240111	0.779599	0.6447	6.43108	7	0	0	-1.68913	0	-0.974903	-0.456548	-0.921517	-0.938854	-0.988261	-1.17711	0.968159	0.538001	1.62322	-0.0282291	1.56819	0.635025	0.152826
8932	10435617	NM_001042499	Rabl3	Mus musculus RAB, member of RAS oncogene family-like 3 (Rabl3), mRNA.	-0.909444	0.640221	0.779523	0.349871	5.766	7	0	0	-1.68897	0	-1.62941	-0.510305	-0.921221	-1.6033	0.0300265	-0.82245	0.85692	0.313917	0.42683	0.589629	1.29221	1.01064	0.96652
521	10350349	NM_001166501	Dennd1b	Mus musculus DENN/MADD domain containing 1B (Dennd1b), transcript variant 1, mRNA.	-0.909152	0.422257	0.779273	0.562477	6.1688	10	0	0	-1.68843	0	-1.27636	-0.756037	-1.31767	-1.23763	-0.489045	-0.37817	0.60371	1.8112	0.400879	0.538877	0.506978	1.30989	0.283378
7603	10421488	NM_207636	Fndc3a	Mus musculus fibronectin type III domain containing 3A (Fndc3a), mRNA.	-0.90912	0.243449	0.779246	0.644734	6.41537	7	0	0	-1.68837	0	-1.34405	-0.829431	-1.02973	-0.697395	-0.834379	-0.719741	-0.0319726	1.34781	1.0503	0.564083	1.58578	0.993973	-0.0552504
2367	10369276	NM_001033259	Ccdc109a	Mus musculus coiled-coil domain containing 109A (Ccdc109a), nuclear gene encoding mitochondrial protein, mRNA.	-0.909024	0.360681	0.779164	0.597484	6.26201	10	0	0	-1.68819	0	-1.3483	-0.747635	-1.13931	-1.11762	-0.748165	-0.353122	0.260001	0.60953	0.137673	0.668758	1.90869	1.15347	0.716024
11447	10460344	AK129014	Tmem134	Mus musculus cDNA fis, clone TRACH3032755.	-0.909019	0.134062	0.77916	0.671145	6.50536	6	0	0	-1.68818	0	-0.846591	-0.812015	-1.09877	-1.05085	-0.875932	-0.769956	1.62545	1.0861	-0.0832805	1.50767	0.851085	0.325992	0.141097
22744	10568188	NM_144522	Tbc1d10b	Mus musculus TBC1 domain family, member 10b (Tbc1d10b), mRNA.	-0.908973	0.430705	0.77912	0.557655	6.14999	10	0	0	-1.68809	0	-1.00845	-0.521832	-0.420295	-0.706323	-1.4643	-1.33264	0.506124	0.538539	0.724829	-0.00614208	1.80866	0.968914	0.912913
9130	10437432	NM_026393	Nmral1	Mus musculus NmrA-like family domain containing 1 (Nmral1), mRNA.	-0.908419	0.579935	0.778645	0.432629	5.86322	9	0	0	-1.68706	0	-0.766773	-0.302542	-0.610519	-0.508809	-1.6624	-1.59947	0.16225	1.09451	0.465266	0.601391	0.665169	1.44498	1.01695
1685	10362676	NM_001168304	Cdk19	Mus musculus cyclin-dependent kinase 19 (Cdk19), transcript variant 1, mRNA.	-0.908338	0.592668	0.778575	0.41833	5.83631	8	0	0	-1.68691	0	-1.82931	-0.910132	-1.23638	-0.879842	-0.134941	-0.459422	0.587326	0.663599	0.164394	0.784194	1.0964	1.49164	0.662472
16547	10510365	NM_016699	Exosc10	Mus musculus exosome component 10 (Exosc10), mRNA.	-0.908283	0.33311	0.778529	0.612722	6.28087	9	0	0	-1.68681	0	-0.952819	-1.16592	-0.46307	-0.713383	-0.76649	-1.38802	0.0425211	0.40314	0.353164	0.627506	1.02159	1.13791	1.86387
8436	10430071	NM_058214	Recql4	Mus musculus RecQ protein-like 4 (Recql4), mRNA.	-0.908232	0.145422	0.778485	0.671154	6.47425	6	0	0	-1.68672	0	-0.814402	-0.883912	-0.904872	-0.702977	-1.05146	-1.09177	0.00189147	0.768567	0.23323	1.0932	0.17311	1.48838	1.69102
35226	10344223	---	---	---	-0.907776	0.318725	0.778094	0.620445	6.28618	9	0	0	-1.68587	0	-0.942773	-1.42729	-0.817675	-0.787075	-1.01436	-0.457487	0.309167	0.32334	0.0918481	0.591182	1.14421	1.82484	1.16207
7854	10424411	NM_021884	Tsg101	Mus musculus tumor susceptibility gene 101 (Tsg101), mRNA.	-0.907529	0.520219	0.777882	0.494892	5.95536	10	0	0	-1.68541	0	-1.6867	-1.10515	-1.17379	-0.65631	-0.210226	-0.613003	1.00324	0.187005	0.10385	1.35666	1.03539	0.568612	1.19041
5765	10404127	NM_175658	Hist1h2aa	Mus musculus histone cluster 1, H2aa (Hist1h2aa), mRNA.	-0.907443	0.521492	0.777809	0.494067	5.95093	10	0	0	-1.68525	0	-0.69995	-0.646137	-0.610612	-0.704931	-1.96189	-0.821135	0.344131	1.28736	0.718244	0.875514	0.232957	0.439095	1.54736
14715	10492598	NM_133787	Nmd3	Mus musculus NMD3 homolog (S. cerevisiae) (Nmd3), mRNA.	-0.907304	0.52221	0.777689	0.493909	5.94621	10	0	0	-1.68499	0	-1.2302	-0.913872	-1.11963	-1.46038	0.0331116	-0.752854	1.05402	0.0660217	0.416558	0.654996	0.962618	0.680242	1.60936
20078	10545682	NM_183138	Tet3	Mus musculus tet methylcytosine dioxygenase 3 (Tet3), mRNA.	-0.907186	0.318149	0.777588	0.622291	6.27048	9	0	0	-1.68477	0	-1.12434	-1.05481	-1.23072	-0.819458	-0.875612	-0.338173	0.626793	0.855864	-0.0660106	0.897056	0.102416	1.39165	1.63535
492	10350015	NM_028320	Adipor1	Mus musculus adiponectin receptor 1 (Adipor1), mRNA.	-0.907157	0.470272	0.777563	0.536095	6.03552	10	0	0	-1.68472	0	-1.33748	-1.02395	-1.51663	-0.690638	-0.590005	-0.284233	1.331	1.63737	0.164261	0.579333	0.454896	0.883331	0.392748
27559	10414173	---	---	---	-0.907102	0.496566	0.777516	0.516136	5.98781	10	0	0	-1.68462	0	-0.710351	-1.62857	-0.281156	-0.51224	-1.19308	-1.11721	0.370312	1.04064	1.04436	0.401174	0.67601	0.221186	1.68894
32105	10340309	---	---	---	-0.906525	0.190484	0.777021	0.666024	6.38987	7	0	0	-1.68355	0	-1.16805	-1.09418	-0.737819	-0.708084	-0.808052	-0.922955	1.78557	-0.052234	0.0469557	1.40999	0.717384	0.863805	0.667677
19120	10536996	NM_029742	Klhdc10	Mus musculus kelch domain containing 10 (Klhdc10), mRNA.	-0.906395	0.53894	0.77691	0.481887	5.89336	10	0	0	-1.6833	0	-1.10287	-1.44565	-1.19147	-0.977734	0.108787	-0.829426	0.940121	0.205096	0.182845	1.04085	1.01225	0.562225	1.49498
27314	10383198	---	---	---	-0.906275	0.337012	0.776807	0.616456	6.22009	9	0	0	-1.68308	0	-1.06725	-0.70819	-1.19411	-1.23539	-0.348533	-0.884167	0.0546335	0.830576	1.9733	0.593487	1.06644	0.511334	0.407874
21798	10561008	NM_001039185	Ceacam1	Mus musculus carcinoembryonic antigen-related cell adhesion molecule 1 (Ceacam1), transcript variant 1, mRNA.	-0.906235	0.653444	0.776773	0.344925	5.66824	7	0	0	-1.68301	0	-1.35279	-1.26089	-1.35457	-1.16659	0.296525	-0.599096	0.605065	0.45304	1.0559	0.680159	1.42087	0.717518	0.504859
28700	10598180	---	---	---	-0.906195	0.495934	0.776739	0.519591	5.96651	10	0	0	-1.68293	0	-1.14476	-1.69767	-0.261731	-0.920993	-0.546778	-0.865242	0.275226	0.275226	0.275226	1.0969	1.18213	0.78214	1.55032
7151	10416843	NM_001033242	Cln5	Mus musculus ceroid-lipofuscinosis, neuronal 5 (Cln5), mRNA.	-0.906061	0.514717	0.776624	0.504585	5.92966	10	0	0	-1.68269	0	-0.928501	-1.15048	-1.70675	-0.909617	-0.212906	-0.528111	0.478298	0.0505444	0.636805	1.45681	0.839072	0.577252	1.39759
18976	10535502	NM_001172146	Aimp2	Mus musculus aminoacyl tRNA synthetase complex-interacting multifunctional protein 2 (Aimp2), transcript variant 1, mRNA.	-0.905882	0.546591	0.77647	0.476466	5.86698	10	0	0	-1.68235	0	-1.28997	-0.890603	-1.15222	-1.55857	-0.105135	-0.438793	0.318987	0.751202	0.53643	0.456073	0.476651	1.4381	1.45785
7917	10425012	NM_145916	Zfp7	Mus musculus zinc finger protein 7 (Zfp7), mRNA.	-0.905681	0.44844	0.776298	0.55595	6.03521	10	0	0	-1.68198	0	-1.08204	-1.52864	-1.20843	-0.778303	-0.459737	-0.376944	0.527337	0.1945	0.0748752	1.40807	1.3317	0.636637	1.26097
8414	10429699	NM_134089	Scrib	Mus musculus scribbled homolog (Drosophila) (Scrib), mRNA.	-0.905667	0.284478	0.776286	0.639744	6.2702	8	0	0	-1.68195	0	-1.27972	-1.03807	-0.97758	-0.964361	-0.720649	-0.453621	0.228182	0.111219	0.177514	0.947426	0.962989	1.16199	1.84468
18610	10531484	NM_175270	Sowahb	Mus musculus sosondowah ankyrin repeat domain family member B (Sowahb), mRNA.	-0.905618	0.188691	0.776244	0.668735	6.365	7	0	0	-1.68186	0	-0.779373	-0.913101	-1.17489	-0.733719	-1.08914	-0.743479	0.444404	0.411724	0.124513	1.02797	1.54973	1.74444	0.130922
16979	10514466	NM_010591	Jun	Mus musculus Jun oncogene (Jun), mRNA.	-0.90539	0.480153	0.776049	0.534339	5.97425	10	0	0	-1.68144	0	-1.16549	-1.03595	-1.22209	-1.18523	0.036627	-0.860221	0.256141	0.859907	0.456751	1.04801	0.28429	0.742769	1.78448
4005	10386236	NM_206882	Hist3h2bb-ps	Mus musculus histone cluster 3, H2bb, pseudogene (Hist3h2bb-ps), mRNA.	-0.905367	0.469471	0.776029	0.542263	5.99198	10	0	0	-1.6814	0	-1.23655	-0.871085	-0.842288	-0.544882	-0.317084	-1.62032	0.388564	1.41033	0.245516	0.693717	0.139574	1.18757	1.36693
21859	10561712	NM_011464	Spint2	Mus musculus serine protease inhibitor, Kunitz type 2 (Spint2), transcript variant 1, mRNA.	-0.905317	0.279549	0.775986	0.642467	6.26624	8	0	0	-1.6813	0	-1.33064	-1.00598	-0.603534	-0.776348	-1.06682	-0.648576	0.704103	1.68163	-0.0408364	0.924865	1.30491	0.898071	-0.0408364
16362	10508382	ENSMUST00000102604	Ak2	cdna:known chromosome:NCBIM37:4:128670468:128688773:1 gene:ENSMUSG00000028792 gene_biotype:protein_coding transcript_biotype:protein_coding	-0.905307	0.24096	0.775978	0.65539	6.30801	7	0	0	-1.68128	0	-0.459407	-0.911538	-0.907189	-1.0216	-0.951521	-1.18059	0.447411	0.749279	-0.0320054	0.443072	0.70704	1.07099	2.04606
25253	10593060	NM_001081373	Cep164	Mus musculus centrosomal protein 164 (Cep164), mRNA.	-0.905124	0.41946	0.775821	0.57612	6.06793	10	0	0	-1.68094	0	-1.0031	-1.60843	-0.500673	-1.04105	-0.478246	-0.799245	0.734731	0.0632153	0.0268317	1.40337	1.45641	1.02319	0.722994
31554	10339611	---	---	---	-0.904992	0.202722	0.775707	0.666885	6.33514	7	0	0	-1.6807	0	-0.701048	-1.17319	-1.09844	-0.802918	-0.953667	-0.700679	-0.0985073	0.696229	0.102525	1.34879	0.444754	1.62293	1.31323
7524	10420497	NM_001164289	Gm6907	Mus musculus predicted gene 6907 (Gm6907), mRNA.	-0.904943	0.488731	0.775665	0.529242	5.94842	10	0	0	-1.68061	0	-0.91943	-0.989645	-1.33712	-1.29429	-0.905379	0.0162136	1.10744	0.131893	0.523518	1.66173	0.245453	0.832049	0.927581
14909	10494411	NR_004412	Rnu1b1	Mus musculus U1b1 small nuclear RNA (Rnu1b1), small nuclear RNA.	-0.904864	0.349276	0.775598	0.614613	6.16516	9	0	0	-1.68046	0	-0.655726	-0.787839	-0.581743	-0.831598	-1.54468	-1.0276	0.189636	1.113	0.288202	0.628545	0.37419	0.886705	1.94891
14912	10494417	NR_004412	Rnu1b1	Mus musculus U1b1 small nuclear RNA (Rnu1b1), small nuclear RNA.	-0.904864	0.349276	0.775598	0.614613	6.16516	9	0	0	-1.68046	0	-0.655726	-0.787839	-0.581743	-0.831598	-1.54468	-1.0276	0.189636	1.113	0.288202	0.628545	0.37419	0.886705	1.94891
15529	10500356	NR_004412	Rnu1b1	Mus musculus U1b1 small nuclear RNA (Rnu1b1), small nuclear RNA.	-0.904864	0.349276	0.775598	0.614613	6.16516	9	0	0	-1.68046	0	-0.655726	-0.787839	-0.581743	-0.831598	-1.54468	-1.0276	0.189636	1.113	0.288202	0.628545	0.37419	0.886705	1.94891
23689	10577655	NM_008324	Ido1	Mus musculus indoleamine 2,3-dioxygenase 1 (Ido1), mRNA.	-0.904791	0.0683444	0.775536	0.689755	6.40877	6	0	0	-1.68033	0	-0.815155	-0.867604	-0.877561	-1.0154	-0.929519	-0.923511	1.03179	-0.139223	0.918538	0.814176	1.29566	1.6646	-0.156787
19702	10542445	NM_011499	Strap	Mus musculus serine/threonine kinase receptor associated protein (Strap), mRNA.	-0.90465	0.263334	0.775414	0.649879	6.26593	8	0	0	-1.68006	0	-1.04983	-1.13065	-1.14423	-0.939785	-0.521045	-0.642372	1.23209	0.656872	0.239221	1.26603	0.281153	0.00488826	1.74765
34404	10343201	---	---	---	-0.90463	0.459993	0.775397	0.551242	5.98959	10	0	0	-1.68003	0	-1.14578	-0.810029	-1.5072	-1.01413	-0.82687	-0.123772	0.633925	0.0850524	0.439825	1.74618	0.433528	0.974847	1.11443
934	10354588	NM_133810	Stk17b	Mus musculus serine/threonine kinase 17b (apoptosis-inducing) (Stk17b), mRNA.	-0.904611	0.400269	0.775381	0.588853	6.08446	10	0	0	-1.67999	0	-1.41771	-0.411733	-1.21916	-0.786138	-1.07798	-0.514944	0.127504	0.783318	1.03032	0.493516	0.171285	1.82537	0.996355
5922	10405733	NM_001039239	Zfp808	Mus musculus zinc finger protein 80 (Zfp808), mRNA.	-0.904009	0.376512	0.774865	0.603447	6.10407	10	0	0	-1.67887	0	-1.47283	-0.901823	-1.18577	-0.803039	-0.439921	-0.62067	0.250576	0.731665	0.181538	1.54998	0.312592	1.63593	0.76177
22049	10563649	NM_001040695	Uevld	Mus musculus UEV and lactate/malate dehyrogenase domains (Uevld), mRNA.	-0.903941	0.583823	0.774807	0.445499	5.75262	9	0	0	-1.67875	0	-1.88192	-1.26296	-0.856209	-0.66966	-0.325186	-0.427719	0.553511	0.292585	1.10665	1.26536	0.216964	1.26907	0.719511
642	10351574	ENSMUST00000097467	Dedd	cdna:known chromosome:NCBIM37:1:173261557:173271747:1 gene:ENSMUSG00000013973 gene_biotype:protein_coding transcript_biotype:protein_coding	-0.903741	0.54564	0.774635	0.48485	5.81862	10	0	0	-1.67838	0	-1.36086	-1.34797	-1.42909	-0.623035	-0.519004	-0.142489	0.440118	0.196489	0.625941	0.39475	1.00935	1.29146	1.46435
1477	10360544	NM_016805	Hnrnpu	Mus musculus heterogeneous nuclear ribonucleoprotein U (Hnrnpu), mRNA.	-0.903693	0.507888	0.774594	0.518058	5.88485	10	0	0	-1.67829	0	-1.15419	-1.18402	-1.41026	-1.13212	-0.132068	-0.409503	0.435557	0.347391	0.243164	1.13833	0.468895	1.25964	1.52919
22770	10568355	NM_023258	Pycard	Mus musculus PYD and CARD domain containing (Pycard), mRNA.	-0.903653	0.40544	0.77456	0.588637	6.05194	10	0	0	-1.67821	0	-1.49164	-0.787696	-1.22564	-0.363129	-0.908754	-0.645062	0.0326596	0.647084	1.12864	1.77134	0.805406	0.879752	0.157037
16557	10510473	NM_023465	Ctnnbip1	Mus musculus catenin beta interacting protein 1 (Ctnnbip1), transcript variant 1, mRNA.	-0.903473	0.331644	0.774406	0.626439	6.15173	9	0	0	-1.67788	0	-1.11861	-0.933629	-1.40427	-0.856289	-0.501686	-0.606348	1.17179	0.199636	-0.0330428	1.50501	0.256264	0.922079	1.3991
3788	10384223	NM_008343	Igfbp3	Mus musculus insulin-like growth factor binding protein 3 (Igfbp3), mRNA.	-0.903323	0.53355	0.774277	0.497347	5.83069	10	0	0	-1.6776	0	-0.96541	-1.0104	-1.36666	-1.40498	0.0501207	-0.722609	1.52119	0.29394	0.491233	0.576735	1.39955	0.793216	0.344081
26154	10601335	BC035042	2610029G23Rik	Mus musculus RIKEN cDNA 2610029G23 gene, mRNA (cDNA clone MGC:41018 IMAGE:1224959), complete cds.	-0.903191	0.588991	0.774164	0.442648	5.72608	9	0	0	-1.67735	0	-0.651301	-0.874315	-1.27846	-1.85702	-0.191731	-0.566321	0.119944	0.801841	0.435069	0.945548	0.774609	0.791967	1.55017
20723	10551382	NM_175107	2310022A10Rik	Mus musculus RIKEN cDNA 2310022A10 gene (2310022A10Rik), transcript variant 1, mRNA.	-0.903132	0.200125	0.774113	0.672199	6.28463	7	0	0	-1.67725	0	-0.676516	-0.679621	-1.00535	-1.19815	-0.924192	-0.934969	0.231468	0.906492	-0.067387	1.73604	0.323769	1.5243	0.764108
7090	10416256	NM_021328	Bin3	Mus musculus bridging integrator 3 (Bin3), mRNA.	-0.902918	0.256338	0.773929	0.656649	6.22552	8	0	0	-1.67685	0	-0.756814	-0.879375	-0.71012	-0.731238	-0.949347	-1.39061	1.5893	1.44413	-0.112754	0.0466416	1.1031	0.79494	0.552153
24612	10586166	---	---	ncrna:snoRNA chromosome:NCBIM37:9:64022855:64022922:1 gene:ENSMUSG00000065752 gene_biotype:snoRNA transcript_biotype:snoRNA	-0.902592	0.520839	0.77365	0.510859	5.83611	10	0	0	-1.67624	0	-1.27535	-1.28712	-0.997918	-0.137048	-1.34415	-0.373968	1.50166	0.75534	0.103486	1.03709	0.941898	0.103486	0.972589
8861	10434778	NM_023386	Rtp4	Mus musculus receptor transporter protein 4 (Rtp4), mRNA.	-0.902361	0.37276	0.773452	0.609934	6.0667	10	0	0	-1.67581	0	-0.838008	-0.266936	-1.07831	-1.06068	-0.798744	-1.37149	0.234997	0.881454	1.72531	-0.0581204	1.17039	1.02302	0.437118
11749	10463155	---	---	cdna:known chromosome:NCBIM37:19:41656860:41661026:1 gene:ENSMUSG00000090673 gene_biotype:protein_coding transcript_biotype:protein_coding	-0.902204	0.227004	0.773318	0.667378	6.23495	7	0	0	-1.67552	0	-1.08452	-1.12536	-0.92506	-0.986376	-0.512384	-0.779527	0.651291	0.0784976	0.296065	0.0885888	1.1752	1.75308	1.3705
10045	10446149	NM_001252466	Ranbp3	Mus musculus RAN binding protein 3 (Ranbp3), transcript variant 1, mRNA.	-0.902201	0.0889768	0.773315	0.694082	6.32649	6	0	0	-1.67552	0	-0.955018	-0.902921	-1.04179	-0.824287	-0.892571	-0.796623	0.0073229	0.848636	-0.0444169	0.809427	0.529601	1.41182	1.85081
17696	10521757	---	---	cdna:pseudogene chromosome:NCBIM37:5:46805583:46805855:1 gene:ENSMUSG00000067321 gene_biotype:pseudogene transcript_biotype:transcribed_processed_pseudogene	-0.902147	0.476015	0.773269	0.54745	5.90215	10	0	0	-1.67542	0	-0.624105	-0.743727	-0.533174	-0.500775	-1.55612	-1.45498	0.488559	1.64245	0.387141	0.390641	0.326595	0.722959	1.45453
27449	10404774	---	---	---	-0.902126	0.506606	0.773251	0.524142	5.84991	10	0	0	-1.67538	0	-1.03275	-1.19051	-1.26576	-1.38285	-0.166401	-0.374486	1.56775	0.112014	0.28928	0.865116	1.12639	0.403565	1.04864
17212	10516590	NM_028603	Zbtb8a	Mus musculus zinc finger and BTB domain containing 8a (Zbtb8a), mRNA.	-0.902111	0.542779	0.773238	0.493095	5.78615	10	0	0	-1.67535	0	-1.34839	-0.735338	-0.801622	-1.11208	0.0394519	-1.45468	0.808266	0.131845	0.905318	0.354787	1.01967	1.63681	0.555966
26000	10599972	ENSMUST00000111964 // ENSMUST00000111964	LOC100862477 // Hnrnpa3	cdna:known chromosome:NCBIM37:2:75497318:75503896:1 gene:ENSMUSG00000059005 gene_biotype:protein_coding transcript_biotype:protein_coding	-0.902026	0.170338	0.773165	0.681728	6.27676	6	0	0	-1.67519	0	-0.85399	-1.15469	-0.95977	-0.665746	-0.790428	-0.987534	0.253503	0.0354174	0.053008	0.679356	1.36441	1.4832	1.54327
23447	10575052	NM_009864	Cdh1	Mus musculus cadherin 1 (Cdh1), mRNA.	-0.902013	0.462782	0.773154	0.557229	5.92068	10	0	0	-1.67517	0	-1.34795	-1.26562	-1.18817	-0.929941	-0.453888	-0.226521	0.740299	0.315773	0.09975	1.24753	0.922744	0.408074	1.67791
1639	10362294	NM_176837	Arhgap18	Mus musculus Rho GTPase activating protein 18 (Arhgap18), mRNA.	-0.901916	0.580458	0.773071	0.456646	5.7135	9	0	0	-1.67499	0	-0.827834	-0.927096	-1.68188	-1.30902	0.0254575	-0.691125	1.53384	0.177661	0.438406	0.640122	1.13548	0.908909	0.577086
10872	10454411	NM_010447	Hnrnpa1	Mus musculus heterogeneous nuclear ribonucleoprotein A1 (Hnrnpa1), transcript variant 1, mRNA.	-0.901847	0.374981	0.773012	0.610212	6.05036	10	0	0	-1.67486	0	-1.20795	-0.993603	-0.693689	-0.693989	-0.403857	-1.418	-0.0182913	0.183889	0.582215	0.630699	0.956469	1.5335	1.5426
4108	10387545	NM_144958	Eif4a1	Mus musculus eukaryotic translation initiation factor 4A1 (Eif4a1), transcript variant 1, mRNA.	-0.901783	0.428333	0.772957	0.580395	5.96977	10	0	0	-1.67474	0	-1.19864	-0.853877	-0.691627	-0.862699	-0.276933	-1.52692	0.501641	0.157663	0.510097	1.00738	1.72606	0.236353	1.2715
2817	10374236	NM_009477	Upp1	Mus musculus uridine phosphorylase 1 (Upp1), transcript variant 1, mRNA.	-0.901777	0.414755	0.772951	0.588573	5.9904	10	0	0	-1.67473	0	-0.695746	-0.840203	-0.704259	-1.45144	-0.375176	-1.34384	0.811831	0.0282983	0.427754	0.685097	1.88862	0.510105	1.05895
1670	10362499	NM_001159544	Frk	Mus musculus fyn-related kinase (Frk), transcript variant 1, mRNA.	-0.90175	0.530745	0.772929	0.50509	5.79916	10	0	0	-1.67468	0	-1.28931	-1.17608	-1.37393	-1.11881	-0.235635	-0.216751	0.259071	0.41168	0.885866	0.254375	1.56359	1.2517	0.784219
3566	10381744	NM_007477	Arf2	Mus musculus ADP-ribosylation factor 2 (Arf2), mRNA.	-0.901486	0.374608	0.772702	0.611392	6.04166	10	0	0	-1.67419	0	-1.07708	-0.702392	-0.74214	-1.12551	-0.354227	-1.40756	1.34526	0.289504	0.0547176	0.111903	1.1541	1.51965	0.933782
25369	10594315	NM_010193	Fem1b	Mus musculus feminization 1 homolog b (C. elegans) (Fem1b), mRNA.	-0.901378	0.330764	0.77261	0.632402	6.09763	9	0	0	-1.67399	0	-1.34771	-0.967106	-1.08118	-0.98856	-0.519343	-0.504375	0.452336	0.0110225	0.349997	0.88844	0.500817	1.79334	1.41232
6872	10414522	NM_009687	Apex1	Mus musculus apurinic/apyrimidinic endonuclease 1 (Apex1), nuclear gene encoding mitochondrial protein, mRNA.	-0.901242	0.340753	0.772493	0.62833	6.08121	9	0	0	-1.67374	0	-0.971215	-1.37478	-0.994897	-0.800167	-0.325998	-0.940395	0.836579	0.568769	0.237806	0.914774	-0.00441483	0.899341	1.9546
24078	10581577	NM_178380	Dhx38	Mus musculus DEAH (Asp-Glu-Ala-His) box polypeptide 38 (Dhx38), mRNA.	-0.90098	0.340485	0.772269	0.629148	6.07477	9	0	0	-1.67325	0	-1.30111	-1.22652	-1.08312	-0.640601	-0.538379	-0.61616	1.2187	0.0599893	-0.0392526	0.600992	0.726153	1.15499	1.68431
23802	10578874	NM_001195687	Gm4975	Mus musculus predicted gene 4975 (Gm4975), mRNA.	-0.900926	0.30223	0.772222	0.645367	6.12076	8	0	0	-1.67315	0	-0.988294	-1.26775	-0.957097	-0.412757	-1.08063	-0.699028	0.0396371	0.760861	0.330943	0.071286	1.23398	1.32877	1.64008
1930	10365088	NM_027381	2510012J08Rik	Mus musculus RIKEN cDNA 2510012J08 gene (2510012J08Rik), mRNA.	-0.900902	0.243274	0.772202	0.665866	6.18383	7	0	0	-1.6731	0	-0.549851	-0.962098	-0.928799	-1.02697	-1.23627	-0.701428	0.159093	0.451243	-0.0686355	0.69824	0.967065	1.77673	1.42167
8343	10429081	NM_011432	Snrpc	Mus musculus U1 small nuclear ribonucleoprotein C (Snrpc), mRNA.	-0.90087	0.485009	0.772174	0.544773	5.85674	10	0	0	-1.67304	0	-0.67812	-0.726036	-1.2086	-0.375091	-0.691316	-1.72605	0.490863	0.184558	0.255988	0.537815	1.54428	0.996226	1.39549
2642	10372629	NM_026570	Yeats4	Mus musculus YEATS domain containing 4 (Yeats4), mRNA.	-0.900807	0.193396	0.772121	0.679592	6.22549	7	0	0	-1.67293	0	-1.06416	-1.00313	-1.12042	-0.837724	-0.624431	-0.754981	0.772403	-0.0940005	0.355826	0.10866	1.31383	1.72757	1.22055
32064	10340260	---	---	---	-0.900727	0.334944	0.772052	0.632293	6.07535	9	0	0	-1.67278	0	-1.24197	-1.13537	-0.980975	-0.449692	-1.07971	-0.51664	0.345047	0.745653	0.122204	1.05948	0.929665	0.24402	1.95829
17757	10522472	NM_001159573	Fip1l1	Mus musculus FIP1 like 1 (S. cerevisiae) (Fip1l1), transcript variant 1, mRNA.	-0.900451	0.219417	0.771815	0.67386	6.19385	7	0	0	-1.67227	0	-1.14864	-0.765621	-0.926388	-0.687814	-1.17415	-0.700092	1.6514	-0.04685	-0.0719053	0.596838	0.75134	1.43306	1.08882
33453	10342011	---	---	---	-0.900449	0.333118	0.771813	0.63383	6.07049	9	0	0	-1.67226	0	-1.52021	-0.623643	-0.600985	-0.891835	-0.839722	-0.926297	0.947112	-0.0105942	0.409941	0.76455	0.389898	0.917795	1.98399
23052	10571007	ENSMUST00000142395	Whsc1l1	cdna:novel chromosome:NCBIM37:8:26712756:26830139:1 gene:ENSMUSG00000054823 gene_biotype:protein_coding transcript_biotype:protein_coding	-0.900432	0.452966	0.771799	0.568583	5.89823	10	0	0	-1.67223	0	-1.47453	-1.22487	-1.12023	-0.747883	-0.580484	-0.254602	0.281152	0.161704	0.231852	0.911607	1.43024	1.53013	0.855913
27801	10447023	---	---	---	-0.900307	0.199675	0.771692	0.679311	6.20672	7	0	0	-1.672	0	-1.08082	-0.968189	-0.877807	-1.11834	-0.590099	-0.766582	-0.110245	1.33547	0.242514	1.67148	0.220937	0.741566	1.30012
8119	10427052	NM_033073	Krt7	Mus musculus keratin 7 (Krt7), mRNA.	-0.900057	0.271612	0.771478	0.658821	6.13218	8	0	0	-1.67153	0	-1.06264	-0.797079	-0.875345	-0.509426	-1.31808	-0.837769	0.760722	0.211405	0.14813	1.97301	0.95534	0.225236	1.1265
12410	10469965	NM_175300	Anapc2	Mus musculus anaphase promoting complex subunit 2 (Anapc2), mRNA.	-0.899899	0.270066	0.771342	0.659752	6.12963	8	0	0	-1.67124	0	-1.01278	-0.359651	-1.09003	-0.964118	-0.937287	-1.03553	0.458526	0.224555	0.0199019	0.585923	1.34342	1.90263	0.864429
27241	10368405	---	---	---	-0.899818	0.415901	0.771273	0.593446	5.94021	10	0	0	-1.67109	0	-0.88315	-0.297045	-0.628174	-1.11794	-0.959311	-1.51329	0.474959	1.37008	0.742091	1.62343	0.960416	-0.0270805	0.255011
28719	10601088	---	---	---	-0.899791	0.751608	0.77125	0.160157	5.34294	5	0	0	-1.67104	0	-0.616517	-0.450831	0.0314317	-0.830623	-1.47472	-2.05749	0.759745	0.686098	0.812737	1.08019	0.707053	0.559705	0.793221
10357	10449312	---	---	cdna:known chromosome:NCBIM37:17:27236603:27238385:-1 gene:ENSMUSG00000086898 gene_biotype:antisense transcript_biotype:antisense	-0.899669	0.439225	0.771145	0.579702	5.90129	10	0	0	-1.67081	0	-1.45484	-1.02017	-0.972363	-1.1742	-0.250319	-0.526113	1.37141	1.22558	0.155794	1.35084	0.886833	0.00679649	0.400762
12514	10471387	NM_028412	Ciz1	Mus musculus CDKN1A interacting zinc finger protein 1 (Ciz1), transcript variant 1, mRNA.	-0.899613	0.378931	0.771097	0.614289	5.9883	10	0	0	-1.67071	0	-1.43635	-1.1632	-0.960295	-0.819704	-0.659474	-0.358649	0.338383	1.40995	0.0105231	1.23944	0.845424	1.43474	0.119211
12481	10470913	NM_153805	Pkn3	Mus musculus protein kinase N3 (Pkn3), mRNA.	-0.899586	0.449068	0.771074	0.573625	5.88404	10	0	0	-1.67066	0	-1.29662	-1.37357	-1.00003	-0.916262	-0.153089	-0.657949	0.565905	0.34226	0.272972	1.25686	0.197654	1.6904	1.07147
19945	10544788	ENSMUST00000048680	Hoxa9	cdna:known chromosome:NCBIM37:6:52173099:52177369:-1 gene:ENSMUSG00000038227 gene_biotype:protein_coding transcript_biotype:protein_coding	-0.89929	0.502113	0.77082	0.536645	5.79144	10	0	0	-1.67011	0	-1.42528	-1.44451	-1.06288	-0.297389	-0.803437	-0.362245	0.560206	0.89658	0.052826	1.16494	0.31001	0.754751	1.65643
10749	10453102	NR_036615	Srsf7	Mus musculus serine/arginine-rich splicing factor 7 (Srsf7), transcript variant 5, non-coding RNA.	-0.899253	0.448798	0.770789	0.574769	5.87649	10	0	0	-1.67004	0	-1.63812	-1.131	-0.921456	-0.796272	-0.469556	-0.439114	0.728476	0.138182	0.0242524	0.991547	0.63238	1.26951	1.61117
25076	10591522	NM_001110300	Ap1m2	Mus musculus adaptor protein complex AP-1, mu 2 subunit (Ap1m2), transcript variant 1, mRNA.	-0.899147	0.484969	0.770697	0.550063	5.81635	10	0	0	-1.66984	0	-1.4267	-1.14128	-1.37137	-0.727703	-0.446681	-0.281149	0.276757	0.513401	0.160713	1.57267	0.547232	1.42065	0.903459
26396	10603387	NM_010413	Hdac6	Mus musculus histone deacetylase 6 (Hdac6), transcript variant 1, mRNA.	-0.898954	0.188522	0.770532	0.685268	6.1787	7	0	0	-1.66949	0	-1.11392	-0.953354	-0.825747	-1.00897	-0.566703	-0.925029	0.237553	0.461785	0.14642	0.573202	0.646588	2.10988	1.21829
6543	10411169	NR_045619	Gm9776	Mus musculus predicted gene 9776 (Gm9776), non-coding RNA.	-0.898411	0.445171	0.770066	0.579547	5.86201	10	0	0	-1.66848	0	-1.17983	-1.19299	-1.32531	-1.00983	-0.272724	-0.409775	0.878663	0.0275218	0.531951	0.802743	0.472013	1.91263	0.76494
21319	10556583	NM_001130479	Nucb2	Mus musculus nucleobindin 2 (Nucb2), transcript variant 1, mRNA.	-0.8984	0.552925	0.770057	0.496273	5.68483	10	0	0	-1.66846	0	-1.22928	-1.14026	-1.15785	-1.13326	0.213435	-0.94319	1.25833	0.228585	0.252147	0.484085	0.689225	1.51263	0.965396
28183	10519713	---	---	---	-0.898299	0.24104	0.76997	0.673037	6.11639	7	0	0	-1.66827	0	-0.776256	-0.8394	-0.675383	-0.751458	-1.01672	-1.33057	0.280686	0.117187	0.00966474	0.64355	1.20981	1.52941	1.59948
12837	10473690	NM_018828	Fnbp4	Mus musculus formin binding protein 4 (Fnbp4), mRNA.	-0.898109	0.249461	0.769808	0.670946	6.10334	7	0	0	-1.66792	0	-1.22504	-0.923231	-0.738582	-1.15369	-0.753032	-0.595085	1.87253	-0.119322	0.473423	0.49651	0.7632	0.468403	1.43391
13799	10484440	NM_144887	Zdhhc5	Mus musculus zinc finger, DHHC domain containing 5 (Zdhhc5), mRNA.	-0.898078	0.494057	0.769782	0.546554	5.77684	10	0	0	-1.66786	0	-1.2194	-1.21977	-1.42795	-0.930609	-0.243441	-0.347302	0.350034	0.423855	0.0100718	1.30809	0.703025	1.48351	1.10988
26575	10604671	---	---	cdna:pseudogene chromosome:NCBIM37:X:53408705:53409570:-1 gene:ENSMUSG00000082253 gene_biotype:pseudogene transcript_biotype:transcribed_processed_pseudogene	-0.898058	0.370137	0.769764	0.622923	5.96157	9	0	0	-1.66782	0	-1.21978	-1.21726	-1.17256	-0.852095	-0.573219	-0.353427	1.36428	0.608513	-0.0198756	1.05137	0.559621	0.150259	1.67418
2133	10367252	NM_133992	Pan2	Mus musculus PAN2 polyA specific ribonuclease subunit homolog (S. cerevisiae) (Pan2), transcript variant 1, mRNA.	-0.897914	0.24407	0.76964	0.673081	6.10338	7	0	0	-1.66755	0	-1.28267	-0.979276	-0.884923	-0.969433	-0.623781	-0.647396	2.06429	-0.0786995	0.685181	0.692167	0.707553	1.03316	0.283838
6366	10409424	NM_016662	Mxd3	Mus musculus Max dimerization protein 3 (Mxd3), mRNA.	-0.897728	0.160773	0.769481	0.69409	6.16509	6	0	0	-1.66721	0	-0.71627	-1.08121	-0.884047	-0.983563	-0.698866	-1.02242	-0.00917805	1.56617	0.0816168	1.42372	0.139546	0.824676	1.35982
12849	10473861	NM_028733	Pacsin3	Mus musculus protein kinase C and casein kinase substrate in neurons 3 (Pacsin3), mRNA.	-0.897657	0.218713	0.76942	0.680936	6.11955	7	0	0	-1.66708	0	-0.620249	-1.21283	-1.00811	-0.682253	-0.963116	-0.899381	1.58809	-0.11835	-0.0288523	0.627284	1.41964	1.24817	0.649967
31749	10339865	---	---	---	-0.897454	0.472357	0.769246	0.564163	5.79725	10	0	0	-1.6667	0	-1.26504	-0.890033	-1.36417	-0.561602	-1.16636	-0.13752	1.38909	0.295202	0.468307	0.382767	0.267823	1.65507	0.926468
15338	10498647	ENSMUST00000061826	B3galnt1	cdna:known chromosome:NCBIM37:3:69378108:69402783:-1 gene:ENSMUSG00000043300 gene_biotype:protein_coding transcript_biotype:protein_coding	-0.89743	0.374706	0.769226	0.622326	5.93994	10	0	0	-1.66666	0	-0.715732	-0.521858	-0.75124	-1.10779	-0.731211	-1.55675	0.0109925	0.842803	0.453756	0.462894	0.411892	1.46282	1.73943
17184	10516296	NM_146153	Thrap3	Mus musculus thyroid hormone receptor associated protein 3 (Thrap3), mRNA.	-0.896987	0.50559	0.768846	0.541065	5.73318	10	0	0	-1.66583	0	-1.615	-0.606226	-1.21294	-1.15148	-0.486787	-0.309485	1.10741	0.0848616	0.633559	0.0292657	1.41323	1.17448	0.939107
7778	10423505	NM_181588	Cmbl	Mus musculus carboxymethylenebutenolidase-like (Pseudomonas) (Cmbl), mRNA.	-0.896823	0.365084	0.768705	0.628685	5.9378	9	0	0	-1.66553	0	-0.738185	-1.3504	-1.21209	-0.648622	-0.392545	-1.0391	1.24857	0.218113	0.111167	1.06149	0.0201049	1.18965	1.53183
11556	10461452	NM_007999	Fen1	Mus musculus flap structure specific endonuclease 1 (Fen1), mRNA.	-0.896748	0.188133	0.768641	0.690704	6.11993	7	0	0	-1.66539	0	-0.546244	-1.05556	-0.851187	-1.03935	-0.975737	-0.912402	0.0278343	1.86205	-0.105647	1.3044	0.553837	0.882839	0.855167
16977	10514461	---	---	cdna:known chromosome:NCBIM37:4:94696654:94715061:-1 gene:ENSMUSG00000052767 gene_biotype:processed_transcript transcript_biotype:processed_transcript	-0.896653	0.555675	0.768559	0.499571	5.64186	10	0	0	-1.66521	0	-0.936338	-1.15659	-0.529633	-1.38486	0.02549	-1.39799	1.32718	0.0968918	0.329643	1.15672	1.09224	0.318914	1.05833
26337	10602925	NM_172783	Phka2	Mus musculus phosphorylase kinase alpha 2 (Phka2), transcript variant 1, mRNA.	-0.896412	0.538171	0.768353	0.516071	5.66632	10	0	0	-1.66476	0	-0.673311	-0.992948	-1.46455	-1.35392	0.0289364	-0.922682	1.60843	0.26924	0.569597	0.86724	0.160191	1.23172	0.672047
9568	10441494	ENSMUST00000146758	Tulp4	cdna:known chromosome:NCBIM37:17:6106858:6124835:1 gene:ENSMUSG00000034377 gene_biotype:protein_coding transcript_biotype:processed_transcript	-0.895943	0.401661	0.767951	0.612212	5.86694	10	0	0	-1.66389	0	-1.15939	-1.14415	-1.39024	-0.326847	-0.755072	-0.599963	1.27804	0.274834	0.0345323	1.3913	1.28138	1.04103	0.0745436
8450	10430201	NM_022410	Myh9	Mus musculus myosin, heavy polypeptide 9, non-muscle (Myh9), transcript variant 1, mRNA.	-0.895915	0.422097	0.767927	0.600721	5.83727	10	0	0	-1.66384	0	-1.33063	-0.686619	-0.42697	-1.03538	-0.493377	-1.40253	0.0196571	1.17764	0.258458	0.187543	0.917909	1.38133	1.43295
15172	10497296	NM_001010834	Slc10a5	Mus musculus solute carrier family 10 (sodium/bile acid cotransporter family), member 5 (Slc10a5), mRNA.	-0.895478	0.395362	0.767553	0.616874	5.86455	10	0	0	-1.66303	0	-1.42584	-0.803516	-1.05223	-0.845639	-0.225284	-1.02035	0.54722	1.44004	0.180617	1.82962	0.421092	0.580177	0.374106
7508	10420362	NM_008125	Gjb2	Mus musculus gap junction protein, beta 2 (Gjb2), mRNA.	-0.895357	0.48884	0.767449	0.558621	5.72338	10	0	0	-1.66281	0	-1.37161	-0.904907	-1.09304	-1.23425	-0.00249172	-0.76584	0.635478	0.0556434	0.477876	1.03507	1.84883	0.650892	0.668354
21928	10562382	NM_025948	Lsm14a	Mus musculus LSM14 homolog A (SCD6, S. cerevisiae) (Lsm14a), mRNA.	-0.895251	0.343143	0.767358	0.642982	5.92712	9	0	0	-1.66261	0	-1.2622	-1.13011	-1.21188	-0.696804	-0.542137	-0.528374	0.26795	0.729252	0.00423207	0.507085	0.572404	1.64031	1.65027
19066	10536407	NM_029404	Phf14	Mus musculus PHD finger protein 14 (Phf14), transcript variant 2, mRNA.	-0.895177	0.43021	0.767294	0.597963	5.80819	10	0	0	-1.66247	0	-1.17853	-1.46882	-0.815933	-1.07654	-0.32363	-0.50761	1.14881	0.0942828	0.0925376	1.16272	0.431083	0.767601	1.67403
19775	10543118	NM_133236	Glcci1	Mus musculus glucocorticoid induced transcript 1 (Glcci1), transcript variant 1, mRNA.	-0.894828	0.552227	0.766995	0.508749	5.60835	10	0	0	-1.66182	0	-0.475534	-0.936848	-0.570492	-0.934171	-1.94051	-0.511412	0.414187	0.547911	0.148136	0.872134	0.637466	1.03443	1.7147
16411	10508883	NM_001083916	1810019J16Rik	Mus musculus RIKEN cDNA 1810019J16 gene (1810019J16Rik), transcript variant 1, mRNA.	-0.894682	0.316616	0.76687	0.655668	5.94467	8	0	0	-1.66155	0	-1.26139	-1.19741	-1.03364	-0.72268	-0.467563	-0.685421	-0.0841004	0.516017	0.00830951	0.899048	0.991938	1.42079	1.61609
18510	10530612	NM_028194	Fryl	Mus musculus furry homolog-like (Drosophila) (Fryl), mRNA.	-0.894455	0.557827	0.766676	0.504861	5.59098	10	0	0	-1.66113	0	-1.73045	-1.00437	-1.32771	-0.558799	-0.367446	-0.377957	0.95849	1.58061	0.507083	1.16747	0.10253	0.674213	0.376335
7023	10415662	ENSMUST00000022551	Rcbtb1	cdna:known chromosome:NCBIM37:14:59820079:59856102:1 gene:ENSMUSG00000035469 gene_biotype:protein_coding transcript_biotype:protein_coding	-0.894334	0.6175	0.766572	0.443667	5.48566	8	0	0	-1.66091	0	-1.84705	-0.437508	-1.44267	-0.836103	-0.398166	-0.404508	1.17193	0.191006	0.555432	0.418507	1.3419	1.14098	0.546253
20077	10545672	NM_008638	Mthfd2	Mus musculus methylenetetrahydrofolate dehydrogenase (NAD+ dependent), methenyltetrahydrofolate cyclohydrolase (Mthfd2), nuclear gene encoding mitochondrial protein, mRNA.	-0.894216	0.392013	0.766471	0.622034	5.83911	10	0	0	-1.66069	0	-1.27634	-0.718845	-1.17978	-1.05374	-0.199406	-0.937191	0.44521	0.42399	-0.0319059	0.950375	0.716271	0.908674	1.95268
4408	10390653	NM_011869	Med24	Mus musculus mediator complex subunit 24 (Med24), mRNA.	-0.893498	0.660355	0.765855	0.392405	5.39287	7	0	0	-1.65935	0	-1.0316	-1.61975	-1.03613	-1.43781	0.120833	-0.35653	0.480568	0.319445	0.436698	0.776261	0.879576	1.43806	1.03038
29983	10342779	---	---	---	-0.89349	0.319216	0.765849	0.657633	5.91242	8	0	0	-1.65934	0	-0.995633	-0.81224	-1.19394	-1.26823	-0.446717	-0.644182	0.123629	1.24875	-0.0811389	1.63019	0.286645	0.900054	1.25282
6871	10414514	NM_013632	Pnp	Mus musculus purine-nucleoside phosphorylase (Pnp), mRNA.	-0.893054	0.650685	0.765475	0.407451	5.40143	8	0	0	-1.65853	0	-1.3606	-0.990609	-1.65389	-0.359445	0.0994923	-1.09328	0.604062	0.445375	0.728967	1.01657	1.57501	0.476433	0.511902
26424	10603627	NM_029510	Bcor	Mus musculus BCL6 interacting corepressor (Bcor), transcript variant a, mRNA.	-0.892837	0.37166	0.765289	0.635966	5.83324	9	0	0	-1.65813	0	-1.28255	-1.3436	-0.93372	-0.720601	-0.700786	-0.375763	0.482951	0.458811	-0.0415565	0.804592	0.521775	1.92677	1.20368
26334	10602865	NM_001163085	Map3k15	Mus musculus mitogen-activated protein kinase kinase kinase 15 (Map3k15), mRNA.	-0.892773	0.215376	0.765234	0.693629	5.996	7	0	0	-1.65801	0	-1.06088	-0.856288	-1.09072	-1.02279	-0.520419	-0.805545	0.921726	0.0755598	0.629489	-0.0456155	0.459563	1.54995	1.76597
10410	10449839	NM_019774	Akap8	Mus musculus A kinase (PRKA) anchor protein 8 (Akap8), mRNA.	-0.892725	0.307036	0.765193	0.664362	5.90738	8	0	0	-1.65792	0	-1.32329	-1.23821	-0.699484	-0.655605	-0.801416	-0.638349	1.44644	0.115947	0.211132	0.096631	0.674265	1.10661	1.70532
17990	10524844	NM_001199685	Taok3	Mus musculus TAO kinase 3 (Taok3), transcript variant 1, mRNA.	-0.892581	0.220611	0.765069	0.692716	5.9869	7	0	0	-1.65765	0	-1.13859	-0.683783	-0.96881	-1.10938	-0.601201	-0.853713	1.48054	0.722008	0.687143	-0.13935	1.46991	1.2628	-0.127566
17906	10523865	NM_182745	1700028K03Rik	Mus musculus RIKEN cDNA 1700028K03 gene (1700028K03Rik), transcript variant 1, mRNA.	-0.892292	0.578505	0.764822	0.492423	5.51092	9	0	0	-1.65711	0	0.124636	-1.17658	-1.12754	-1.55555	-0.652243	-0.966474	0.937911	0.124636	1.1174	0.197353	0.470374	1.20135	1.30473
13423	10479639	NM_016775	Dnajc5	Mus musculus DnaJ (Hsp40) homolog, subfamily C, member 5 (Dnajc5), mRNA.	-0.891635	0.181626	0.764258	0.704314	5.99224	6	0	0	-1.65589	0	-0.909026	-1.03634	-0.798257	-1.12764	-0.611111	-0.867433	1.28125	-0.0320836	0.230204	-0.0827674	1.02408	1.35529	1.57384
24005	10580875	NM_008187	Gtl3	Mus musculus gene trap locus 3 (Gtl3), mRNA.	-0.891634	0.368086	0.764257	0.640817	5.80943	9	0	0	-1.65589	0	-0.97616	-0.790282	-1.53669	-0.548621	-0.542161	-0.955883	1.61433	-0.0810491	0.0629006	1.15366	0.850574	0.455567	1.29382
2860	10374746	NM_025923	Fancl	Mus musculus Fanconi anemia, complementation group L (Fancl), mRNA.	-0.891473	0.414764	0.76412	0.617031	5.74453	10	0	0	-1.65559	0	-1.27737	-0.999897	-1.23945	-0.899821	-0.137125	-0.795173	0.371254	0.171883	0.0745297	1.21563	0.621476	1.71795	1.17611
29606	10340932	---	---	---	-0.891347	0.218364	0.764012	0.696251	5.95779	7	0	0	-1.65536	0	-1.1173	-0.59728	-1.13677	-0.70004	-0.853886	-0.942802	0.437617	0.0180992	0.254267	0.512081	0.748702	1.36294	2.01438
5441	10401128	NM_008558	Max	Mus musculus Max protein (Max), transcript variant 1, mRNA.	-0.891266	0.308083	0.763942	0.667588	5.87091	8	0	0	-1.65521	0	-1.24176	-1.13179	-1.08536	-0.676235	-0.760281	-0.452168	0.885401	0.223695	-0.0283226	1.5379	1.32624	1.34037	0.0623157
18015	10525158	NR_003507	Oas1b	Mus musculus 2'-5' oligoadenylate synthetase 1B (Oas1b), non-coding RNA.	-0.890863	0.270502	0.763597	0.682003	5.89968	8	0	0	-1.65446	0	-0.616166	-0.642363	-1.1506	-0.731364	-0.950193	-1.25449	-0.00306008	0.516303	1.78747	0.0456132	1.44513	1.01477	0.538952
8850	10434698	NM_021564	Fetub	Mus musculus fetuin beta (Fetub), transcript variant 1, mRNA.	-0.890171	0.116738	0.763004	0.719051	5.99144	6	0	0	-1.65318	0	-0.954133	-0.998275	-0.702466	-0.999508	-0.863124	-0.823522	0.666117	0.321039	0.0597196	1.10048	1.05161	2.07501	0.0670549
20149	10546294	NM_018815	Nup210	Mus musculus nucleoporin 210 (Nup210), mRNA.	-0.889721	0.412318	0.762618	0.623063	5.70817	10	0	0	-1.65234	0	-0.861718	-0.174395	-0.818466	-1.04274	-1.00811	-1.43291	0.0737578	1.49845	0.309605	1.151	0.164783	0.617387	1.52335
1338	10359181	NM_023141	Tor3a	Mus musculus torsin family 3, member A (Tor3a), mRNA.	-0.889575	0.297661	0.762493	0.675667	5.84149	8	0	0	-1.65207	0	-1.25858	-0.544934	-1.05849	-0.62264	-0.719561	-1.13324	-0.0856659	0.631648	0.882066	1.9245	0.729826	0.0795363	1.17554
3397	10380210	NM_173374	Srsf1	Mus musculus serine/arginine-rich splicing factor 1 (Srsf1), transcript variant 1, mRNA.	-0.889159	0.445518	0.762136	0.605253	5.65014	10	0	0	-1.65129	0	-1.12184	-1.21448	-1.20686	-1.15945	-0.286045	-0.346277	0.197429	0.259723	0.513916	0.732996	0.417539	1.50926	1.70409
26251	10601993	NM_175326	D330045A20Rik	Mus musculus RIKEN cDNA D330045A20 gene (D330045A20Rik), mRNA.	-0.888977	0.3892	0.76198	0.637265	5.72156	10	0	0	-1.65096	0	-1.07442	-1.14339	-1.21134	-1.11972	-0.456271	-0.328731	0.317233	0.983636	0.140106	1.21707	0.639057	1.86964	0.167122
13436	10479765	NM_022724	Suv39h2	Mus musculus suppressor of variegation 3-9 homolog 2 (Drosophila) (Suv39h2), transcript variant 1, mRNA.	-0.888959	0.07209	0.761965	0.72668	5.9766	6	0	0	-1.65092	0	-0.919935	-0.931948	-0.808797	-0.888268	-0.983857	-0.800952	0.0654277	0.061162	0.0434591	1.09994	0.820974	1.42029	1.82251
12501	10471191	NM_144886	Exosc2	Mus musculus exosome component 2 (Exosc2), mRNA.	-0.888724	0.163884	0.761763	0.714696	5.93078	6	0	0	-1.65049	0	-0.805394	-0.675432	-0.992266	-0.95264	-0.78198	-1.12463	0.292224	0.532282	-0.113892	0.516081	0.696498	1.40255	2.0066
21547	10559270	NM_020285	Tssc4	Mus musculus tumor-suppressing subchromosomal transferable fragment 4 (Tssc4), transcript variant 1, mRNA.	-0.888454	0.30652	0.761532	0.675105	5.80576	8	0	0	-1.64999	0	-1.237	-0.584143	-0.90328	-0.591488	-0.743805	-1.27101	0.0861175	1.33967	-0.0232616	0.419664	1.02759	1.82436	0.65659
[truncated: 1,665 more rows]
