# Supplementary material for: In Vivo Disruption of an Rb–E2F–Ezh2 Signaling Loop Causes Bladder Cancer
Source: Oxford University Press journal article supplement (doi:10.1158/0008-5472.can-14-1218), 2014-09-25
Supplement: 00085472can141218-sup-130432_2_supp_2585846_n9gpn1.xlsx [file 00085472can141218-sup-130432_2_supp_2585846_n9gpn1.xlsx]

## Sheet: GOBP Up in mouse tumors
Category	Term	Count	%	PValue	Genes	List Total	Pop Hits	Pop Total	Fold Enrichment	Bonferroni	Benjamini	FDR
GOTERM_BP_FAT	GO:0007049~cell cycle	215	13.5647	3.50271e-87	10385325, 10419779, 10424411, 10443047, 10538832, 10352356, 10352048, 10420320, 10350392, 10495316, 10386909, 10474902, 10474984, 10593913, 10449839, 10420426, 10356461, 10443527, 10463951, 10378024, 10592342, 10433721, 10568731, 10570131, 10514340, 10428672, 10385153, 10364683, 10424779, 10523281, 10514347, 10371159, 10451805, 10446441, 10385842, 10425890, 10411728, 10379127, 10583952, 10503264,…	1073	611	13588	4.45608	8.72175e-84	8.72175e-84	6.17633e-84
GOTERM_BP_FAT	GO:0022402~cell cycle process	157	9.90536	1.26693e-71	10385325, 10373530, 10419779, 10352767, 10424411, 10562637, 10391461, 10367179, 10593060, 10443047, 10538832, 10352356, 10427052, 10352048, 10420320, 10359890, 10350392, 10541729, 10438308, 10487340, 10386909, 10589420, 10556266, 10591781, 10474902, 10528077, 10583264, 10338354, 10474984, 10427166, 10540738, 10449839, 10474769, 10420426, 10339266, 10463951, 10378024, 10515744, 10410560, 10592342,…	1073	393	13588	5.05898	3.15464e-68	1.57732e-68	2.23397e-68
GOTERM_BP_FAT	GO:0022403~cell cycle phase	143	9.02208	5.27425e-71	10385325, 10373530, 10419779, 10352767, 10562637, 10367179, 10593060, 10443047, 10538832, 10352356, 10427052, 10352048, 10420320, 10359890, 10350392, 10541729, 10438308, 10487340, 10386909, 10589420, 10556266, 10591781, 10474902, 10528077, 10583264, 10338354, 10474984, 10427166, 10540738, 10449839, 10474769, 10420426, 10339266, 10463951, 10378024, 10515744, 10410560, 10433721, 10568731, 10365578,…	1073	328	13588	5.521	1.31329e-67	4.37763e-68	9.30008e-68
GOTERM_BP_FAT	GO:0000279~M phase	131	8.26498	8.97961e-69	10385325, 10373530, 10419779, 10352767, 10562637, 10367179, 10593060, 10443047, 10538832, 10352356, 10352048, 10420320, 10359890, 10350392, 10541729, 10438308, 10487340, 10386909, 10589420, 10556266, 10591781, 10474902, 10583264, 10338354, 10474984, 10427166, 10540738, 10449839, 10474769, 10420426, 10339266, 10463951, 10378024, 10515744, 10410560, 10433721, 10365578, 10385153, 10424779, 10573451,…	1073	283	13588	5.86193	2.23592e-65	5.58981e-66	1.58337e-65
GOTERM_BP_FAT	GO:0051301~cell division	125	7.88644	4.78212e-63	10385325, 10373530, 10419779, 10352767, 10424411, 10562637, 10367179, 10593060, 10443047, 10538832, 10352356, 10359890, 10350392, 10541729, 10487340, 10386909, 10589420, 10556266, 10591781, 10338354, 10474984, 10593913, 10474769, 10420426, 10339266, 10550102, 10463951, 10378024, 10515744, 10433721, 10568731, 10514340, 10365578, 10385153, 10424779, 10573451, 10381072, 10523281, 10371159, 10451805,…	1073	281	13588	5.63326	1.19075e-59	2.38149e-60	8.4323e-60
GOTERM_BP_FAT	GO:0000278~mitotic cell cycle	114	7.19243	3.63208e-60	10385325, 10373530, 10419779, 10352767, 10562637, 10367179, 10593060, 10443047, 10538832, 10352356, 10359890, 10350392, 10541729, 10487340, 10386909, 10589420, 10556266, 10591781, 10528077, 10338354, 10474984, 10449839, 10420426, 10474769, 10339266, 10463951, 10378024, 10515744, 10407126, 10433721, 10568731, 10365578, 10385153, 10381072, 10371159, 10451805, 10400589, 10592201, 10594426, 10411728,…	1073	244	13588	5.91658	9.04388e-57	1.50731e-57	6.40444e-57
GOTERM_BP_FAT	GO:0000087~M phase of mitotic cell cycle	100	6.30915	9.40427e-58	10385325, 10419779, 10373530, 10352767, 10562637, 10367179, 10593060, 10443047, 10538832, 10352356, 10359890, 10541729, 10350392, 10487340, 10386909, 10589420, 10556266, 10591781, 10338354, 10474984, 10449839, 10420426, 10474769, 10339266, 10463951, 10378024, 10515744, 10433721, 10365578, 10385153, 10381072, 10371159, 10451805, 10400589, 10594426, 10411728, 10379127, 10583952, 10496204, 10523297,…	1073	194	13588	6.52761	2.34166e-54	3.34523e-55	1.65825e-54
GOTERM_BP_FAT	GO:0000280~nuclear division	98	6.18297	1.30415e-56	10385325, 10419779, 10373530, 10352767, 10562637, 10367179, 10593060, 10443047, 10538832, 10352356, 10359890, 10541729, 10350392, 10487340, 10386909, 10589420, 10556266, 10591781, 10338354, 10474984, 10449839, 10420426, 10474769, 10339266, 10463951, 10378024, 10515744, 10433721, 10365578, 10385153, 10381072, 10371159, 10451805, 10400589, 10594426, 10411728, 10379127, 10583952, 10496204, 10523297,…	1073	190	13588	6.53173	3.24734e-53	4.05917e-54	2.29961e-53
GOTERM_BP_FAT	GO:0007067~mitosis	98	6.18297	1.30415e-56	10385325, 10419779, 10373530, 10352767, 10562637, 10367179, 10593060, 10443047, 10538832, 10352356, 10359890, 10541729, 10350392, 10487340, 10386909, 10589420, 10556266, 10591781, 10338354, 10474984, 10449839, 10420426, 10474769, 10339266, 10463951, 10378024, 10515744, 10433721, 10365578, 10385153, 10381072, 10371159, 10451805, 10400589, 10594426, 10411728, 10379127, 10583952, 10496204, 10523297,…	1073	190	13588	6.53173	3.24734e-53	4.05917e-54	2.29961e-53
GOTERM_BP_FAT	GO:0006259~DNA metabolic process	144	9.08517	2.15663e-55	10385325, 10500837, 10391461, 10506118, 10593060, 10524169, 10565862, 10396030, 10574812, 10451225, 10427052, 10352048, 10387492, 10603135, 10474902, 10583264, 10528077, 10528790, 10483025, 10540738, 10483023, 10602164, 10573461, 10550102, 10463951, 10371846, 10465282, 10410560, 10535979, 10533090, 10592342, 10578690, 10605303, 10576140, 10464659, 10428672, 10487930, 10484999, 10381072, 10400649,…	1073	421	13588	4.33148	5.37001e-52	5.96668e-53	3.80279e-52
GOTERM_BP_FAT	GO:0048285~organelle fission	98	6.18297	9.84634e-55	10385325, 10419779, 10373530, 10352767, 10562637, 10367179, 10593060, 10443047, 10538832, 10352356, 10359890, 10541729, 10350392, 10487340, 10386909, 10589420, 10556266, 10591781, 10338354, 10474984, 10449839, 10420426, 10474769, 10339266, 10463951, 10378024, 10515744, 10433721, 10365578, 10385153, 10381072, 10371159, 10451805, 10400589, 10594426, 10411728, 10379127, 10583952, 10496204, 10523297,…	1073	197	13588	6.29964	2.45174e-51	2.45174e-52	1.7362e-51
GOTERM_BP_FAT	GO:0006974~response to DNA damage stimulus	93	5.86751	2.35746e-33	10385325, 10500837, 10391461, 10367179, 10506118, 10593060, 10524169, 10396030, 10451225, 10352048, 10603135, 10474902, 10583264, 10528790, 10540738, 10575745, 10463951, 10550102, 10410560, 10368888, 10578690, 10464659, 10487930, 10484999, 10385842, 10592201, 10588294, 10414173, 10564978, 10548086, 10435581, 10450384, 10555620, 10546834, 10419611, 10369815, 10527801, 10435024, 10465912, 10467697,…	1073	287	13588	4.10352	5.87007e-30	5.33643e-31	4.1569e-30
GOTERM_BP_FAT	GO:0006260~DNA replication	67	4.22713	3.06608e-33	10357436, 10391461, 10546163, 10562818, 10555695, 10524169, 10508759, 10565862, 10476989, 10427052, 10451225, 10367076, 10437945, 10578557, 10474902, 10526217, 10528077, 10586184, 10461391, 10483025, 10405628, 10353733, 10483023, 10602164, 10473414, 10550102, 10361110, 10465282, 10543114, 10476362, 10535979, 10533090, 10384032, 10592342, 10573615, 10562563, 10534974, 10344939, 10576140, 10603011,…	1073	152	13588	5.58196	7.63453e-30	6.36211e-31	5.40641e-30
GOTERM_BP_FAT	GO:0051276~chromosome organization	109	6.87697	3.24402e-31	10385325, 10540999, 10413697, 10352767, 10494402, 10494405, 10494407, 10405888, 10538832, 10574812, 10573261, 10387492, 10487340, 10386909, 10403959, 10379346, 10509500, 10403955, 10403957, 10578615, 10384145, 10474984, 10404061, 10403951, 10404063, 10540738, 10449839, 10404065, 10404067, 10356461, 10404069, 10602164, 10408246, 10405874, 10408243, 10463951, 10520521, 10378024, 10404127, 10562005,…	1073	404	13588	3.41665	8.0776e-28	6.21354e-29	5.72017e-28
GOTERM_BP_FAT	GO:0006281~DNA repair	78	4.92114	1.22695e-30	10385325, 10397719, 10500837, 10508151, 10391461, 10524450, 10506118, 10562818, 10593060, 10524169, 10582501, 10396030, 10451225, 10352048, 10603135, 10474902, 10399391, 10583264, 10528790, 10479560, 10461391, 10540738, 10374746, 10393761, 10473414, 10444911, 10463951, 10550102, 10410560, 10490815, 10578690, 10540639, 10389395, 10510172, 10515257, 10507362, 10354542, 10464659, 10437040, 10487930,…	1073	222	13588	4.44936	3.05511e-27	2.18222e-28	2.16349e-27
GOTERM_BP_FAT	GO:0033554~cellular response to stress	100	6.30915	1.82677e-25	10385325, 10500837, 10391461, 10367179, 10506118, 10593060, 10524169, 10396421, 10396030, 10451225, 10352048, 10603135, 10474902, 10583264, 10528790, 10540738, 10452980, 10575745, 10365260, 10550102, 10463951, 10368888, 10410560, 10578690, 10464659, 10487930, 10484999, 10592201, 10385842, 10588294, 10414173, 10564978, 10435581, 10548086, 10412100, 10450384, 10555620, 10419611, 10546834, 10369815,…	1073	404	13588	3.13454	4.54866e-22	3.03244e-23	3.22114e-22
GOTERM_BP_FAT	GO:0007059~chromosome segregation	38	2.39748	8.58891e-25	10492558, 10385325, 10452709, 10352767, 10365578, 10385153, 10483401, 10360985, 10538832, 10459755, 10574812, 10451805, 10359890, 10390707, 10346365, 10428561, 10411728, 10399254, 10583952, 10474984, 10361651, 10496204, 10352709, 10389627, 10427166, 10465861, 10449839, 10379989, 10420426, 10474381, 10460738, 10356461, 10382998, 10524790, 10499366, 10378024, 10585129, 10489078	1073	64	13588	7.51899	2.13864e-21	1.33665e-22	1.51448e-21
GOTERM_BP_FAT	GO:0006323~DNA packaging	45	2.83912	1.24504e-22	10492558, 10404036, 10540999, 10589466, 10546163, 10494402, 10342675, 10494405, 10408085, 10494407, 10408087, 10500333, 10408200, 10573261, 10408202, 10408081, 10500329, 10487340, 10408083, 10386909, 10403959, 10376459, 10509500, 10408204, 10403955, 10403957, 10376455, 10474984, 10384145, 10404024, 10404061, 10403951, 10404026, 10496379, 10404028, 10408197, 10404063, 10449839, 10404065, 10404067,…	1073	101	13588	5.64218	3.10014e-19	1.82361e-20	2.19537e-19
GOTERM_BP_FAT	GO:0006325~chromatin organization	75	4.73186	3.50727e-18	10540999, 10413697, 10494402, 10494405, 10405888, 10494407, 10574812, 10573261, 10386909, 10403959, 10379346, 10509500, 10403955, 10403957, 10578615, 10384145, 10403951, 10404061, 10404063, 10404065, 10404067, 10356461, 10404069, 10405874, 10408246, 10602164, 10408243, 10520521, 10404127, 10562005, 10544501, 10405868, 10403948, 10403945, 10568731, 10403943, 10603387, 10403941, 10408239, 10522944,…	1073	315	13588	3.01513	8.7331e-15	4.85172e-16	6.18437e-15
GOTERM_BP_FAT	GO:0006333~chromatin assembly or disassembly	41	2.58675	1.6621e-17	10540999, 10494402, 10494405, 10494407, 10405888, 10573261, 10386909, 10403959, 10509500, 10403955, 10403957, 10384145, 10403951, 10404061, 10404063, 10404065, 10356461, 10404067, 10404069, 10408246, 10405874, 10408243, 10520521, 10404127, 10405868, 10403948, 10403945, 10403943, 10403941, 10408239, 10522944, 10393058, 10546088, 10403938, 10500324, 10410207, 10344028, 10409220, 10342502, 10500896,…	1073	109	13588	4.76336	4.13863e-14	2.17823e-15	2.93078e-14
GOTERM_BP_FAT	GO:0065004~protein-DNA complex assembly	34	2.14511	2.93095e-17	10404036, 10540999, 10546163, 10494402, 10342675, 10494405, 10408085, 10494407, 10408087, 10500333, 10408200, 10573261, 10408202, 10408081, 10500329, 10408083, 10386909, 10403959, 10376459, 10509500, 10408204, 10403955, 10403957, 10376455, 10384145, 10404024, 10404061, 10403951, 10404026, 10496379, 10404028, 10408197, 10404063, 10404065, 10404067, 10356461, 10404069, 10408246, 10408243, 10360679,…	1073	76	13588	5.66528	7.29807e-14	3.64903e-15	5.16814e-14
GOTERM_BP_FAT	GO:0007017~microtubule-based process	57	3.59621	1.51352e-16	10577070, 10419779, 10452709, 10391461, 10450605, 10483401, 10480628, 10443047, 10361669, 10352356, 10350297, 10607806, 10359890, 10420320, 10447594, 10370127, 10495316, 10438308, 10413316, 10513818, 10590494, 10477187, 10431352, 10508986, 10474984, 10361956, 10427166, 10432398, 10391811, 10362581, 10441620, 10594251, 10463951, 10462632, 10473919, 10519488, 10433721, 10573490, 10601011, 10426650,…	1073	211	13588	3.42096	2.76446e-13	1.32117e-14	1.9984e-13
GOTERM_BP_FAT	GO:0031497~chromatin assembly	33	2.08202	1.65359e-16	10404036, 10540999, 10546163, 10494402, 10342675, 10494405, 10408085, 10494407, 10408087, 10500333, 10408200, 10573261, 10408202, 10408081, 10500329, 10408083, 10386909, 10403959, 10376459, 10509500, 10408204, 10403955, 10403957, 10376455, 10384145, 10404024, 10404061, 10403951, 10404026, 10496379, 10404028, 10404063, 10408197, 10404065, 10404067, 10356461, 10404069, 10408246, 10408243, 10360679,…	1073	75	13588	5.57197	2.76446e-13	1.25455e-14	1.9984e-13
GOTERM_BP_FAT	GO:0000226~microtubule cytoskeleton organization	40	2.52366	2.33051e-16	10577070, 10419779, 10452709, 10573490, 10391461, 10450605, 10426650, 10385153, 10483401, 10361669, 10579468, 10459844, 10352356, 10607806, 10359890, 10420320, 10495316, 10438308, 10370127, 10430201, 10513818, 10477187, 10456490, 10431352, 10474984, 10508986, 10361956, 10496204, 10410576, 10427166, 10361375, 10462796, 10474381, 10506004, 10441620, 10382998, 10568897, 10463951, 10521090, 10473919,…	1073	111	13588	4.56345	5.52891e-13	2.40918e-14	3.88578e-13
GOTERM_BP_FAT	GO:0034728~nucleosome organization	32	2.01893	2.57917e-15	10404036, 10540999, 10546163, 10494402, 10342675, 10494405, 10408085, 10494407, 10408087, 10500333, 10408200, 10573261, 10408202, 10408081, 10500329, 10408083, 10403959, 10376459, 10509500, 10408204, 10403955, 10403957, 10376455, 10384145, 10404024, 10404061, 10403951, 10404026, 10496379, 10404028, 10404063, 10408197, 10404065, 10404067, 10356461, 10404069, 10408246, 10408243, 10360679, 10408111,…	1073	76	13588	5.33203	6.35825e-12	2.64899e-13	4.50751e-12
GOTERM_BP_FAT	GO:0006334~nucleosome assembly	31	1.95584	5.64267e-15	10404036, 10540999, 10546163, 10494402, 10342675, 10494405, 10408085, 10494407, 10408087, 10500333, 10408200, 10573261, 10408202, 10408081, 10500329, 10408083, 10403959, 10376459, 10509500, 10408204, 10403955, 10403957, 10376455, 10384145, 10404024, 10404061, 10403951, 10404026, 10496379, 10404028, 10404063, 10408197, 10404065, 10404067, 10356461, 10404069, 10408246, 10408243, 10360679, 10408111,…	1073	73	13588	5.37768	1.40987e-11	5.63993e-13	9.9809e-12
GOTERM_BP_FAT	GO:0006261~DNA-dependent DNA replication	20	1.26183	5.61924e-13	10503264, 10534974, 10586184, 10438378, 10357436, 10353733, 10546163, 10562818, 10400649, 10572906, 10353420, 10605674, 10367076, 10437945, 10527801, 10578557, 10562563, 10474902, 10354085, 10363575	1073	34	13588	7.44915	1.39909e-09	5.38112e-11	9.90774e-10
GOTERM_BP_FAT	GO:0051726~regulation of cell cycle	51	3.21767	1.69101e-12	10424413, 10508151, 10582835, 10430071, 10449303, 10491805, 10538832, 10591881, 10353341, 10514466, 10386949, 10500543, 10438308, 10580282, 10528077, 10453252, 10474984, 10586184, 10429699, 10563303, 10429455, 10569071, 10600545, 10549341, 10552337, 10585129, 10566142, 10542038, 10562563, 10455439, 10568731, 10576140, 10464659, 10569994, 10462361, 10514340, 10374590, 10524105, 10402750, 10542317,…	1073	214	13588	3.01795	4.21054e-09	1.55946e-10	2.9817e-09
GOTERM_BP_FAT	GO:0007126~meiosis	31	1.95584	1.88416e-12	10385325, 10460376, 10352767, 10573451, 10424779, 10582501, 10568714, 10352048, 10451805, 10385842, 10588294, 10346365, 10430201, 10584710, 10405185, 10474902, 10583264, 10499035, 10450384, 10427166, 10389627, 10361375, 10540738, 10527268, 10602599, 10463951, 10476252, 10527801, 10410560, 10558723, 10444524, 10479765	1073	88	13588	4.46103	4.69156e-09	1.67556e-10	3.32234e-09
GOTERM_BP_FAT	GO:0051327~M phase of meiotic cell cycle	31	1.95584	1.88416e-12	10385325, 10460376, 10352767, 10573451, 10424779, 10582501, 10568714, 10352048, 10451805, 10385842, 10588294, 10346365, 10430201, 10584710, 10405185, 10474902, 10583264, 10499035, 10450384, 10427166, 10389627, 10361375, 10540738, 10527268, 10602599, 10463951, 10476252, 10527801, 10410560, 10558723, 10444524, 10479765	1073	88	13588	4.46103	4.69156e-09	1.67556e-10	3.32234e-09
GOTERM_BP_FAT	GO:0034621~cellular macromolecular complex subunit organization	55	3.47003	2.5959e-12	10540999, 10494402, 10541091, 10494405, 10480628, 10494407, 10573261, 10447097, 10488929, 10386909, 10403959, 10509500, 10403955, 10403957, 10384145, 10500630, 10404061, 10432398, 10403951, 10404063, 10404065, 10404067, 10356461, 10362581, 10404069, 10408246, 10408243, 10378024, 10520521, 10404127, 10519488, 10403948, 10403945, 10403943, 10403941, 10426650, 10408239, 10407993, 10411728, 10393058,…	1073	245	13588	2.84284	6.46385e-09	2.22891e-10	4.57739e-09
GOTERM_BP_FAT	GO:0051321~meiotic cell cycle	31	1.95584	3.65369e-12	10385325, 10460376, 10352767, 10573451, 10424779, 10582501, 10568714, 10352048, 10451805, 10385842, 10588294, 10346365, 10430201, 10584710, 10405185, 10474902, 10583264, 10499035, 10450384, 10427166, 10389627, 10361375, 10540738, 10527268, 10602599, 10463951, 10476252, 10527801, 10410560, 10558723, 10444524, 10479765	1073	90	13588	4.36189	9.09782e-09	3.03261e-10	6.44265e-09
GOTERM_BP_FAT	GO:0051236~establishment of RNA localization	26	1.64038	9.16743e-12	10534441, 10582599, 10454411, 10452228, 10374590, 10365578, 10506680, 10407993, 10422854, 10602173, 10427885, 10393844, 10385052, 10470973, 10476889, 10574033, 10425905, 10546294, 10473650, 10361651, 10420572, 10599893, 10541067, 10372687, 10427310, 10597969, 10382542, 10409322, 10539177, 10473919, 10552740	1073	66	13588	4.98868	2.28269e-08	7.36353e-10	1.61649e-08
GOTERM_BP_FAT	GO:0050658~RNA transport	26	1.64038	9.16743e-12	10534441, 10582599, 10454411, 10452228, 10374590, 10365578, 10506680, 10407993, 10422854, 10602173, 10427885, 10393844, 10385052, 10470973, 10476889, 10574033, 10425905, 10546294, 10473650, 10361651, 10420572, 10599893, 10541067, 10372687, 10427310, 10597969, 10382542, 10409322, 10539177, 10473919, 10552740	1073	66	13588	4.98868	2.28269e-08	7.36353e-10	1.61649e-08
GOTERM_BP_FAT	GO:0050657~nucleic acid transport	26	1.64038	9.16743e-12	10534441, 10582599, 10454411, 10452228, 10374590, 10365578, 10506680, 10407993, 10422854, 10602173, 10427885, 10393844, 10385052, 10470973, 10476889, 10574033, 10425905, 10546294, 10473650, 10361651, 10420572, 10599893, 10541067, 10372687, 10427310, 10597969, 10382542, 10409322, 10539177, 10473919, 10552740	1073	66	13588	4.98868	2.28269e-08	7.36353e-10	1.61649e-08
GOTERM_BP_FAT	GO:0034622~cellular macromolecular complex assembly	50	3.15457	1.07194e-11	10540999, 10494402, 10541091, 10494405, 10480628, 10494407, 10573261, 10447097, 10488929, 10386909, 10403959, 10509500, 10403955, 10403957, 10384145, 10404061, 10432398, 10403951, 10404063, 10404065, 10356461, 10362581, 10404067, 10404069, 10408246, 10408243, 10520521, 10378024, 10404127, 10519488, 10403948, 10403945, 10403943, 10403941, 10426650, 10408239, 10407993, 10393058, 10546088, 10403938,…	1073	217	13588	2.91787	2.66911e-08	8.34097e-10	1.89014e-08
GOTERM_BP_FAT	GO:0006403~RNA localization	26	1.64038	1.35415e-11	10534441, 10582599, 10454411, 10452228, 10374590, 10365578, 10506680, 10407993, 10422854, 10602173, 10427885, 10393844, 10385052, 10470973, 10476889, 10574033, 10425905, 10546294, 10473650, 10361651, 10420572, 10599893, 10541067, 10372687, 10427310, 10597969, 10382542, 10409322, 10539177, 10473919, 10552740	1073	67	13588	4.91422	3.37183e-08	1.02177e-09	2.38777e-08
GOTERM_BP_FAT	GO:0051028~mRNA transport	25	1.57729	1.38545e-11	10534441, 10582599, 10454411, 10452228, 10374590, 10365578, 10506680, 10407993, 10422854, 10602173, 10427885, 10393844, 10385052, 10470973, 10476889, 10574033, 10425905, 10546294, 10473650, 10361651, 10420572, 10599893, 10541067, 10372687, 10427310, 10597969, 10382542, 10409322, 10539177, 10552740	1073	62	13588	5.10627	3.44976e-08	1.01464e-09	2.44296e-08
GOTERM_BP_FAT	GO:0043933~macromolecular complex subunit organization	69	4.35331	2.02941e-11	10540999, 10494402, 10541091, 10494405, 10480628, 10494407, 10573261, 10447097, 10488929, 10386909, 10403959, 10509500, 10403955, 10403957, 10384145, 10500630, 10432398, 10403951, 10404061, 10404063, 10404065, 10404067, 10356461, 10362581, 10404069, 10568217, 10408246, 10408243, 10404127, 10378024, 10520521, 10519488, 10403948, 10403945, 10403943, 10403941, 10426650, 10408239, 10407993, 10411728,…	1073	367	13588	2.38089	5.05323e-08	1.44378e-09	3.57846e-08
GOTERM_BP_FAT	GO:0007051~spindle organization	17	1.07256	2.4828e-11	10452709, 10419779, 10427166, 10361375, 10450605, 10483401, 10579468, 10459844, 10463951, 10352356, 10420320, 10521090, 10370127, 10438308, 10430201, 10513818, 10477187, 10562084, 10508986	1073	28	13588	7.68859	6.18218e-08	1.71727e-09	4.37792e-08
GOTERM_BP_FAT	GO:0065003~macromolecular complex assembly	64	4.03785	8.80713e-11	10540999, 10494402, 10541091, 10494405, 10480628, 10494407, 10573261, 10447097, 10488929, 10386909, 10403959, 10509500, 10403955, 10403957, 10384145, 10432398, 10403951, 10404061, 10404063, 10404065, 10404067, 10356461, 10362581, 10404069, 10568217, 10408246, 10408243, 10378024, 10520521, 10404127, 10519488, 10403948, 10403945, 10403943, 10403941, 10426650, 10408239, 10407993, 10393058, 10546088,…	1073	338	13588	2.39783	2.19298e-07	5.92696e-09	1.55296e-07
GOTERM_BP_FAT	GO:0015931~nucleobase, nucleoside, nucleotide and nucleic acid transport	26	1.64038	1.65612e-10	10534441, 10582599, 10454411, 10452228, 10374590, 10365578, 10506680, 10407993, 10422854, 10602173, 10427885, 10393844, 10385052, 10470973, 10476889, 10574033, 10425905, 10546294, 10473650, 10361651, 10420572, 10599893, 10541067, 10372687, 10427310, 10597969, 10382542, 10409322, 10539177, 10473919, 10552740	1073	74	13588	4.44936	4.12375e-07	1.0852e-08	2.92024e-07
GOTERM_BP_FAT	GO:0006396~RNA processing	75	4.73186	2.11616e-10	10541104, 10454411, 10576124, 10506786, 10409689, 10452228, 10434148, 10447702, 10414256, 10455989, 10541091, 10547758, 10602173, 10438313, 10528200, 10447097, 10581674, 10541112, 10412559, 10395910, 10500630, 10378579, 10517345, 10522472, 10539177, 10556113, 10500253, 10511207, 10532720, 10447515, 10515884, 10375880, 10514340, 10352735, 10407993, 10344741, 10407390, 10453102, 10579830, 10507914,…	1073	437	13588	2.17338	5.26925e-07	1.35109e-08	3.73143e-07
GOTERM_BP_FAT	GO:0008380~RNA splicing	45	2.83912	3.54661e-10	10541104, 10479268, 10454411, 10573217, 10546066, 10409689, 10452228, 10455989, 10414256, 10447702, 10541091, 10385365, 10602173, 10517486, 10528200, 10447097, 10581674, 10391768, 10364518, 10541112, 10395910, 10500630, 10371981, 10599972, 10442435, 10378579, 10521690, 10427310, 10517345, 10597969, 10515113, 10580986, 10498185, 10539177, 10500253, 10508697, 10492045, 10447515, 10473008, 10515884,…	1073	201	13588	2.83513	8.83105e-07	2.20776e-08	6.25373e-07
GOTERM_BP_FAT	GO:0006397~mRNA processing	53	3.34385	3.95076e-10	10541104, 10479268, 10454411, 10573217, 10546066, 10452228, 10409689, 10455989, 10447702, 10414256, 10541091, 10385365, 10602173, 10513381, 10517486, 10528200, 10447097, 10581674, 10527455, 10391768, 10412559, 10364518, 10541112, 10395910, 10500630, 10371981, 10599972, 10442435, 10378579, 10521690, 10343284, 10427310, 10517345, 10597969, 10522472, 10515113, 10580986, 10498185, 10539177, 10500253,…	1073	262	13588	2.56171	9.83739e-07	2.39936e-08	6.96637e-07
GOTERM_BP_FAT	GO:0016071~mRNA metabolic process	58	3.65931	4.27204e-10	10541104, 10479268, 10454411, 10573217, 10546066, 10452228, 10409689, 10455989, 10531633, 10447702, 10414256, 10541091, 10385365, 10602173, 10513381, 10517486, 10528200, 10447097, 10581674, 10527455, 10391768, 10412559, 10364518, 10541112, 10395910, 10500630, 10371981, 10599972, 10442435, 10378579, 10521690, 10343284, 10427310, 10517345, 10597969, 10522472, 10515113, 10580986, 10498185, 10539177,…	1073	302	13588	2.43207	1.06374e-06	2.53271e-08	7.53288e-07
GOTERM_BP_FAT	GO:0006270~DNA replication initiation	10	0.630915	1.06697e-09	10353420, 10534974, 10503264, 10605674, 10438378, 10437945, 10357436, 10546163, 10562563, 10572906	1073	10	13588	12.6636	2.65675e-06	6.17849e-08	1.88138e-06
GOTERM_BP_FAT	GO:0006310~DNA recombination	22	1.38801	1.93201e-07	10389627, 10524450, 10527268, 10430071, 10447395, 10550102, 10396849, 10549057, 10352048, 10527801, 10588294, 10410560, 10414173, 10584710, 10564978, 10424363, 10474902, 10548086, 10370837, 10499035, 10515257, 10528790, 10390050	1073	75	13588	3.71464	0.000480955	1.09334e-05	0.000340671
GOTERM_BP_FAT	GO:0000070~mitotic sister chromatid segregation	11	0.694006	2.18215e-07	10492558, 10352767, 10449839, 10585129, 10385153, 10460738, 10474381, 10538832, 10524790, 10583952, 10474984	1073	18	13588	7.73884	0.000543207	1.20745e-05	0.000384777
GOTERM_BP_FAT	GO:0000819~sister chromatid segregation	11	0.694006	4.28075e-07	10492558, 10352767, 10449839, 10585129, 10385153, 10460738, 10474381, 10538832, 10524790, 10583952, 10474984	1073	19	13588	7.33153	0.00106534	2.31716e-05	0.000754822
GOTERM_BP_FAT	GO:0016568~chromatin modification	43	2.71293	4.63865e-07	10413697, 10464728, 10458138, 10589466, 10405888, 10574812, 10573261, 10383055, 10477942, 10386909, 10379346, 10578615, 10538282, 10356461, 10526319, 10602164, 10405874, 10562005, 10544501, 10405868, 10444524, 10591369, 10479765, 10568731, 10603387, 10603011, 10415662, 10521136, 10542557, 10522944, 10462973, 10370837, 10388234, 10410207, 10421573, 10603431, 10479402, 10517465, 10491860, 10571007,…	1073	236	13588	2.30734	0.00115436	2.45747e-05	0.00081793
GOTERM_BP_FAT	GO:0010605~negative regulation of macromolecule metabolic process	73	4.60568	5.88197e-07	10538617, 10590325, 10506786, 10508151, 10603469, 10424411, 10367179, 10405888, 10449303, 10438313, 10529273, 10574812, 10432972, 10514466, 10594404, 10383055, 10477942, 10559276, 10569024, 10379346, 10380689, 10538282, 10579125, 10586184, 10563303, 10538939, 10405874, 10385686, 10540472, 10602164, 10521389, 10351574, 10510473, 10556113, 10404774, 10405868, 10444524, 10454912, 10568731, 10534694,…	1073	506	13588	1.82696	0.00146354	3.05123e-05	0.00103716
GOTERM_BP_FAT	GO:0007010~cytoskeleton organization	53	3.34385	7.46073e-07	10577070, 10419779, 10452709, 10447602, 10391461, 10450605, 10508805, 10421877, 10483401, 10361669, 10352356, 10607806, 10432780, 10359890, 10420320, 10370127, 10438308, 10495316, 10513818, 10477187, 10431352, 10474984, 10361956, 10383472, 10508986, 10427166, 10441620, 10463951, 10473919, 10433721, 10561527, 10573490, 10385153, 10426650, 10579468, 10459844, 10456904, 10500928, 10425890, 10391052,…	1073	326	13588	2.0588	0.001856	3.7912e-05	0.00131554
GOTERM_BP_FAT	GO:0007127~meiosis I	14	0.883281	1.21846e-06	10450384, 10385325, 10389627, 10427166, 10361375, 10540738, 10573451, 10424779, 10588294, 10410560, 10558723, 10444524, 10430201, 10405185, 10474902	1073	35	13588	5.06542	0.00302937	6.06774e-05	0.00214849
GOTERM_BP_FAT	GO:0000075~cell cycle checkpoint	17	1.07256	1.3776e-06	10464659, 10496204, 10576140, 10586184, 10508151, 10524105, 10369815, 10602599, 10382998, 10538832, 10447395, 10592201, 10451220, 10585129, 10594426, 10456488, 10456439, 10584710, 10456490	1073	52	13588	4.14001	0.00342435	6.72571e-05	0.00242909
GOTERM_BP_FAT	GO:0006284~base-excision repair	10	0.630915	5.1195e-06	10507362, 10571870, 10461391, 10524450, 10487930, 10562818, 10547088, 10518350, 10518352, 10414497, 10578690, 10540639, 10368370, 10363575, 10510172	1073	19	13588	6.66503	0.0126667	0.000245116	0.00902683
GOTERM_BP_FAT	GO:0032886~regulation of microtubule-based process	15	0.946372	5.43178e-06	10603387, 10496204, 10374590, 10420426, 10542317, 10379989, 10360985, 10491805, 10603208, 10459755, 10521090, 10438308, 10495316, 10456439, 10456488, 10513818, 10456490, 10542310, 10508986	1073	45	13588	4.22119	0.0134341	0.000255159	0.00957742
GOTERM_BP_FAT	GO:0051169~nuclear transport	23	1.4511	5.86494e-06	10582599, 10454411, 10492598, 10374590, 10497503, 10422854, 10407993, 10602173, 10427885, 10385052, 10453512, 10476889, 10350535, 10425905, 10586844, 10392284, 10473650, 10444858, 10525983, 10358064, 10346634, 10478799, 10430438, 10427310, 10597969, 10590892, 10432986, 10465282, 10592342	1073	98	13588	2.97206	0.0144976	0.000270403	0.0103411
GOTERM_BP_FAT	GO:0010564~regulation of cell cycle process	19	1.19874	1.03123e-05	10496204, 10576140, 10586184, 10361375, 10374590, 10382998, 10430071, 10360985, 10491805, 10538832, 10371159, 10531274, 10438308, 10451220, 10585129, 10527801, 10456488, 10456439, 10528077, 10456490, 10474984	1073	73	13588	3.296	0.025351	0.000466761	0.0181822
GOTERM_BP_FAT	GO:0070507~regulation of microtubule cytoskeleton organization	13	0.820189	1.15232e-05	10603387, 10496204, 10374590, 10420426, 10542317, 10379989, 10491805, 10603208, 10459755, 10438308, 10495316, 10456488, 10456439, 10513818, 10456490, 10542310, 10508986	1073	36	13588	4.57295	0.0282851	0.000512242	0.0203169
GOTERM_BP_FAT	GO:0006913~nucleocytoplasmic transport	22	1.38801	1.45299e-05	10582599, 10454411, 10492598, 10374590, 10497503, 10422854, 10407993, 10602173, 10427885, 10385052, 10453512, 10476889, 10350535, 10425905, 10586844, 10392284, 10473650, 10444858, 10525983, 10358064, 10346634, 10478799, 10430438, 10427310, 10597969, 10590892, 10432986, 10465282	1073	96	13588	2.90207	0.0355332	0.000634532	0.0256175
GOTERM_BP_FAT	GO:0000910~cytokinesis	11	0.694006	2.17711e-05	10554445, 10416256, 10377405, 10465861, 10527801, 10430201, 10382998, 10591781, 10432511, 10524790, 10474984	1073	27	13588	5.15923	0.0527674	0.000934229	0.038382
GOTERM_BP_FAT	GO:0030261~chromosome condensation	10	0.630915	2.21822e-05	10492558, 10547943, 10487340, 10449839, 10390707, 10460738, 10504957, 10583952, 10399087, 10474984	1073	22	13588	5.75616	0.0537365	0.000935734	0.0391066
GOTERM_BP_FAT	GO:0051325~interphase	15	0.946372	2.68887e-05	10460738, 10382998, 10360985, 10582981, 10427052, 10504730, 10350504, 10424188, 10605674, 10592201, 10446679, 10427606, 10528077, 10379891, 10370837, 10568731	1073	51	13588	3.72458	0.0647616	0.00111527	0.0474023
GOTERM_BP_FAT	GO:0007018~microtubule-based movement	22	1.38801	3.27541e-05	10601011, 10450605, 10426650, 10480628, 10443047, 10512236, 10350297, 10394344, 10413316, 10590494, 10568150, 10496204, 10432398, 10391811, 10462796, 10474381, 10362581, 10594251, 10454709, 10462632, 10515431, 10519488, 10433721, 10587780, 10592058	1073	101	13588	2.7584	0.0783216	0.00133614	0.0577395
GOTERM_BP_FAT	GO:0007346~regulation of mitotic cell cycle	21	1.32492	4.86271e-05	10569994, 10576140, 10462361, 10424413, 10582835, 10524105, 10402750, 10497325, 10570470, 10360985, 10538832, 10591881, 10407325, 10353341, 10386949, 10500543, 10438308, 10594426, 10553857, 10528077, 10456490, 10453252, 10474984, 10496204, 10429699, 10361375, 10400153, 10369815, 10429455, 10600545, 10382998, 10549341, 10565589, 10424188, 10552337, 10531274, 10451220, 10527801, 10585129, 10456439,…	1073	96	13588	2.77015	0.114041	0.00195107	0.0857094
GOTERM_BP_FAT	GO:0044265~cellular macromolecule catabolic process	76	4.79495	6.55773e-05	10443000, 10464728, 10506786, 10395612, 10391461, 10506118, 10560260, 10341145, 10548699, 10541729, 10413316, 10413752, 10338354, 10350090, 10560672, 10588577, 10442435, 10456296, 10374746, 10541307, 10541182, 10399036, 10339266, 10573461, 10371846, 10342779, 10574656, 10361110, 10539177, 10515744, 10355582, 10469965, 10562331, 10490815, 10364287, 10594315, 10445702, 10605303, 10603387, 10478572,…	1073	609	13588	1.58035	0.150658	0.00258859	0.115569
GOTERM_BP_FAT	GO:0051329~interphase of mitotic cell cycle	14	0.883281	7.65588e-05	10460738, 10382998, 10360985, 10582981, 10504730, 10350504, 10424188, 10605674, 10592201, 10446679, 10427606, 10528077, 10379891, 10370837, 10568731	1073	49	13588	3.61816	0.173569	0.0029743	0.13491
GOTERM_BP_FAT	GO:0045934~negative regulation of nucleobase, nucleoside, nucleotide and nucleic acid metabolic process	54	3.40694	0.000103529	10538617, 10590325, 10508151, 10424411, 10367179, 10405888, 10529273, 10432972, 10594404, 10383055, 10477942, 10379346, 10517609, 10380689, 10538282, 10586184, 10579125, 10405874, 10385686, 10602164, 10540472, 10521389, 10351574, 10510473, 10404774, 10405868, 10444524, 10568731, 10591369, 10382328, 10576140, 10603011, 10359770, 10370721, 10544779, 10407993, 10360985, 10409424, 10454782, 10522944,…	1073	397	13588	1.7225	0.22725	0.0039583	0.182395
GOTERM_BP_FAT	GO:0031023~microtubule organizing center organization	9	0.567823	0.000117255	10419779, 10410576, 10391461, 10473919, 10462796, 10579468, 10433721, 10562084, 10459844, 10352356	1073	21	13588	5.42724	0.253218	0.00441419	0.206554
GOTERM_BP_FAT	GO:0051172~negative regulation of nitrogen compound metabolic process	54	3.40694	0.000134698	10538617, 10590325, 10508151, 10424411, 10367179, 10405888, 10529273, 10432972, 10594404, 10383055, 10477942, 10379346, 10517609, 10380689, 10538282, 10586184, 10579125, 10405874, 10385686, 10602164, 10540472, 10521389, 10351574, 10510473, 10404774, 10405868, 10444524, 10568731, 10591369, 10382328, 10576140, 10603011, 10359770, 10370721, 10544779, 10407993, 10360985, 10409424, 10454782, 10522944,…	1073	401	13588	1.70532	0.284962	0.00499375	0.237246
GOTERM_BP_FAT	GO:0010558~negative regulation of macromolecule biosynthetic process	54	3.40694	0.000381362	10538617, 10590325, 10508151, 10424411, 10367179, 10405888, 10529273, 10432972, 10594404, 10383055, 10477942, 10569024, 10379346, 10380689, 10538282, 10586184, 10579125, 10538939, 10405874, 10385686, 10602164, 10540472, 10521389, 10351574, 10510473, 10404774, 10405868, 10444524, 10454912, 10568731, 10591369, 10382328, 10576140, 10603011, 10359770, 10370721, 10544779, 10360985, 10560685, 10409424,…	1073	418	13588	1.63596	0.613171	0.0138702	0.670327
GOTERM_BP_FAT	GO:0033043~regulation of organelle organization	26	1.64038	0.000416581	10603387, 10374590, 10542317, 10430071, 10357332, 10603208, 10491805, 10538832, 10539135, 10459755, 10595000, 10574812, 10500928, 10438308, 10495316, 10386909, 10513818, 10347297, 10456490, 10474984, 10508986, 10412100, 10496204, 10379989, 10420426, 10531274, 10451220, 10456439, 10456488, 10542310	1073	154	13588	2.138	0.645662	0.0149238	0.732018
GOTERM_BP_FAT	GO:0031327~negative regulation of cellular biosynthetic process	55	3.47003	0.000423026	10538617, 10590325, 10508151, 10391461, 10424411, 10367179, 10405888, 10529273, 10432972, 10594404, 10383055, 10477942, 10569024, 10379346, 10380689, 10538282, 10586184, 10579125, 10538939, 10405874, 10385686, 10602164, 10540472, 10521389, 10351574, 10510473, 10404774, 10405868, 10444524, 10454912, 10568731, 10591369, 10382328, 10576140, 10603011, 10359770, 10370721, 10544779, 10360985, 10560685,…	1073	430	13588	1.61976	0.651305	0.0149381	0.743303
GOTERM_BP_FAT	GO:0008104~protein localization	86	5.42587	0.00044287	10590325, 10380751, 10391963, 10492598, 10381744, 10524781, 10424411, 10497503, 10361669, 10506680, 10606619, 10488237, 10359890, 10453512, 10476889, 10416256, 10401114, 10354054, 10350535, 10574033, 10383436, 10536746, 10406681, 10361651, 10420572, 10429699, 10444858, 10461391, 10561388, 10346634, 10358064, 10563303, 10479833, 10396108, 10441620, 10399036, 10372687, 10590892, 10591522, 10465282,…	1073	753	13588	1.4463	0.668123	0.015415	0.778043
GOTERM_BP_FAT	GO:0051052~regulation of DNA metabolic process	14	0.883281	0.00047311	10576140, 10479560, 10586184, 10461391, 10508151, 10546834, 10506118, 10487930, 10447395, 10435024, 10527801, 10490815, 10408321, 10564978, 10414514, 10363575	1073	58	13588	3.05672	0.692205	0.0162324	0.83096
GOTERM_BP_FAT	GO:0009890~negative regulation of biosynthetic process	55	3.47003	0.000535028	10538617, 10590325, 10508151, 10391461, 10424411, 10367179, 10405888, 10529273, 10432972, 10594404, 10383055, 10477942, 10569024, 10379346, 10380689, 10538282, 10586184, 10579125, 10538939, 10405874, 10385686, 10602164, 10540472, 10521389, 10351574, 10510473, 10404774, 10405868, 10444524, 10454912, 10568731, 10591369, 10382328, 10576140, 10603011, 10359770, 10370721, 10544779, 10360985, 10560685,…	1073	434	13588	1.60483	0.736203	0.0180889	0.939228
GOTERM_BP_FAT	GO:0051053~negative regulation of DNA metabolic process	8	0.504732	0.000578637	10576140, 10586184, 10508151, 10546834, 10527801, 10408321, 10564978, 10447395	1073	20	13588	5.06542	0.763362	0.0192875	1.01541
GOTERM_BP_FAT	GO:0009057~macromolecule catabolic process	76	4.79495	0.000601134	10443000, 10464728, 10506786, 10395612, 10391461, 10506118, 10560260, 10341145, 10548699, 10541729, 10413316, 10413752, 10338354, 10350090, 10560672, 10588577, 10442435, 10456296, 10374746, 10541307, 10541182, 10399036, 10339266, 10573461, 10371846, 10342779, 10574656, 10361110, 10539177, 10515744, 10355582, 10469965, 10562331, 10490815, 10364287, 10594315, 10445702, 10605303, 10603387, 10478572,…	1073	654	13588	1.47161	0.776261	0.0197657	1.0547
GOTERM_BP_FAT	GO:0051225~spindle assembly	7	0.44164	0.000638992	10419779, 10361375, 10450605, 10477187, 10579468, 10562084, 10459844, 10352356	1073	15	13588	5.90966	0.7964	0.0207243	1.12077
GOTERM_BP_FAT	GO:0051493~regulation of cytoskeleton organization	19	1.19874	0.000666602	10412100, 10603387, 10496204, 10374590, 10379989, 10420426, 10542317, 10603208, 10357332, 10491805, 10539135, 10459755, 10595000, 10500928, 10438308, 10495316, 10456439, 10456488, 10513818, 10347297, 10456490, 10542310, 10508986	1073	99	13588	2.43038	0.809936	0.0213327	1.16893
GOTERM_BP_FAT	GO:0010629~negative regulation of gene expression	52	3.28076	0.000758079	10538617, 10590325, 10506786, 10603469, 10424411, 10367179, 10405888, 10438313, 10529273, 10574812, 10432972, 10594404, 10477942, 10383055, 10559276, 10379346, 10380689, 10538282, 10579125, 10405874, 10385686, 10602164, 10540472, 10521389, 10351574, 10510473, 10556113, 10404774, 10405868, 10444524, 10568731, 10591369, 10534694, 10358454, 10382328, 10603011, 10359770, 10370721, 10544779, 10360985,…	1073	410	13588	1.60611	0.848676	0.0239187	1.32833
GOTERM_BP_FAT	GO:0051656~establishment of organelle localization	10	0.630915	0.000986328	10429699, 10460891, 10492598, 10385153, 10430201, 10460738, 10474381, 10382998, 10360985, 10474984	1073	34	13588	3.72458	0.914323	0.0306247	1.725
GOTERM_BP_FAT	GO:0007076~mitotic chromosome condensation	5	0.315457	0.00111067	10492558, 10449839, 10460738, 10583952, 10474984	1073	7	13588	9.0454	0.937156	0.0339975	1.94046
GOTERM_BP_FAT	GO:0009411~response to UV	10	0.630915	0.00123611	10586184, 10456357, 10443463, 10464128, 10563303, 10546834, 10527801, 10506118, 10490815, 10571696, 10447395	1073	35	13588	3.61816	0.954033	0.0373087	2.15737
GOTERM_BP_FAT	GO:0007050~cell cycle arrest	13	0.820189	0.00139026	10443463, 10514340, 10424411, 10542317, 10364683, 10447395, 10424188, 10565570, 10592342, 10371770, 10414315, 10553521, 10542310, 10568731	1073	57	13588	2.88818	0.968701	0.041366	2.42331
GOTERM_BP_FAT	GO:0009262~deoxyribonucleotide metabolic process	8	0.504732	0.00148404	10526972, 10394978, 10475610, 10542460, 10555695, 10445558, 10414514, 10528915	1073	23	13588	4.40472	0.975227	0.0435762	2.58475
GOTERM_BP_FAT	GO:0045786~negative regulation of cell cycle	11	0.694006	0.0015508	10496204, 10429699, 10514340, 10443463, 10542317, 10538832, 10451220, 10456488, 10456439, 10408321, 10571696, 10456490, 10542310, 10568731	1073	43	13588	3.23952	0.979026	0.0449635	2.69954
GOTERM_BP_FAT	GO:0019941~modification-dependent protein catabolic process	60	3.78549	0.00166427	10443000, 10464728, 10395612, 10391461, 10506118, 10560260, 10341145, 10548699, 10541729, 10413316, 10413752, 10338354, 10350090, 10560672, 10588577, 10456296, 10374746, 10541307, 10541182, 10399036, 10339266, 10342779, 10574656, 10361110, 10515744, 10469965, 10562331, 10355582, 10490815, 10364287, 10594315, 10445702, 10603387, 10478572, 10451004, 10544186, 10524105, 10393774, 10387138, 10484999,…	1073	508	13588	1.4957	0.984196	0.0476227	2.89434
GOTERM_BP_FAT	GO:0043632~modification-dependent macromolecule catabolic process	60	3.78549	0.00166427	10443000, 10464728, 10395612, 10391461, 10506118, 10560260, 10341145, 10548699, 10541729, 10413316, 10413752, 10338354, 10350090, 10560672, 10588577, 10456296, 10374746, 10541307, 10541182, 10399036, 10339266, 10342779, 10574656, 10361110, 10515744, 10469965, 10562331, 10355582, 10490815, 10364287, 10594315, 10445702, 10603387, 10478572, 10451004, 10544186, 10524105, 10393774, 10387138, 10484999,…	1073	508	13588	1.4957	0.984196	0.0476227	2.89434
GOTERM_BP_FAT	GO:0034508~centromere complex assembly	4	0.252366	0.00184348	10378024, 10386909, 10356461, 10462973	1073	4	13588	12.6636	0.989893	0.0520225	3.20125
GOTERM_BP_FAT	GO:0000375~RNA splicing, via transesterification reactions	10	0.630915	0.00188807	10563260, 10454411, 10378579, 10541091, 10354704, 10407993, 10427310, 10517345, 10597969, 10602173, 10540118, 10427885, 10498185, 10444595, 10447097	1073	37	13588	3.42258	0.990957	0.0526521	3.27747
GOTERM_BP_FAT	GO:0000398~nuclear mRNA splicing, via spliceosome	10	0.630915	0.00188807	10563260, 10454411, 10378579, 10541091, 10354704, 10407993, 10427310, 10517345, 10597969, 10602173, 10540118, 10427885, 10498185, 10444595, 10447097	1073	37	13588	3.42258	0.990957	0.0526521	3.27747
GOTERM_BP_FAT	GO:0000377~RNA splicing, via transesterification reactions with bulged adenosine as nucleophile	10	0.630915	0.00188807	10563260, 10454411, 10378579, 10541091, 10354704, 10407993, 10427310, 10517345, 10597969, 10602173, 10540118, 10427885, 10498185, 10444595, 10447097	1073	37	13588	3.42258	0.990957	0.0526521	3.27747
GOTERM_BP_FAT	GO:0051297~centrosome organization	7	0.44164	0.00192959	10419779, 10391461, 10462796, 10579468, 10433721, 10562084, 10459844, 10352356	1073	18	13588	4.92472	0.991847	0.0531849	3.3484
GOTERM_BP_FAT	GO:0006275~regulation of DNA replication	7	0.44164	0.00192959	10576140, 10586184, 10461391, 10508151, 10527801, 10487930, 10408321, 10363575	1073	18	13588	4.92472	0.991847	0.0531849	3.3484
GOTERM_BP_FAT	GO:0007093~mitotic cell cycle checkpoint	8	0.504732	0.00195417	10496204, 10524105, 10451220, 10585129, 10594426, 10456439, 10456488, 10369815, 10538832, 10456490	1073	24	13588	4.22119	0.992332	0.0532557	3.39035
GOTERM_BP_FAT	GO:0006468~protein amino acid phosphorylation	72	4.54259	0.00202179	10454414, 10373530, 10360338, 10352767, 10562637, 10401343, 10491805, 10524266, 10427015, 10431393, 10494023, 10460891, 10377405, 10572235, 10504470, 10478326, 10486564, 10556266, 10373467, 10405464, 10351163, 10530516, 10517243, 10449527, 10435094, 10376733, 10452980, 10474769, 10420198, 10538939, 10443527, 10526319, 10470913, 10416037, 10499536, 10407126, 10587508, 10562563, 10490104, 10476033,…	1073	640	13588	1.42465	0.993522	0.0544539	3.5057
GOTERM_BP_FAT	GO:0051603~proteolysis involved in cellular protein catabolic process	62	3.91167	0.00207459	10443000, 10464728, 10395612, 10391461, 10506118, 10560260, 10341145, 10548699, 10541729, 10413316, 10413752, 10338354, 10350090, 10560672, 10588577, 10456296, 10374746, 10541307, 10541182, 10399036, 10339266, 10342779, 10574656, 10361110, 10515744, 10469965, 10562331, 10355582, 10490815, 10364287, 10594315, 10445702, 10603387, 10478572, 10451004, 10544186, 10524105, 10393774, 10387138, 10484999,…	1073	534	13588	1.4703	0.994322	0.0552408	3.59568
GOTERM_BP_FAT	GO:0031577~spindle checkpoint	5	0.315457	0.00208279	10496204, 10451220, 10456439, 10456488, 10382998, 10538832, 10456490	1073	8	13588	7.91473	0.994437	0.0548672	3.60965
GOTERM_BP_FAT	GO:0050000~chromosome localization	5	0.315457	0.00208279	10385153, 10460738, 10474381, 10382998, 10360985	1073	8	13588	7.91473	0.994437	0.0548672	3.60965
GOTERM_BP_FAT	GO:0051303~establishment of chromosome localization	5	0.315457	0.00208279	10385153, 10460738, 10474381, 10382998, 10360985	1073	8	13588	7.91473	0.994437	0.0548672	3.60965
GOTERM_BP_FAT	GO:0032392~DNA geometric change	6	0.378549	0.00227779	10569994, 10534974, 10462361, 10424413, 10357436, 10582835, 10402750, 10546163, 10497325, 10570470, 10591881, 10407325, 10353341, 10386949, 10437945, 10500543, 10474902, 10553857, 10453252, 10400153, 10429455, 10600545, 10565589, 10552337, 10566142, 10542038, 10385426, 10455439	1073	13	13588	5.84472	0.99658	0.0592291	3.94124
GOTERM_BP_FAT	GO:0044257~cellular protein catabolic process	62	3.91167	0.00239922	10443000, 10464728, 10395612, 10391461, 10506118, 10560260, 10341145, 10548699, 10541729, 10413316, 10413752, 10338354, 10350090, 10560672, 10588577, 10456296, 10374746, 10541307, 10541182, 10399036, 10339266, 10342779, 10574656, 10361110, 10515744, 10469965, 10562331, 10355582, 10490815, 10364287, 10594315, 10445702, 10603387, 10478572, 10451004, 10544186, 10524105, 10393774, 10387138, 10484999,…	1073	537	13588	1.46209	0.997474	0.061648	4.14717
GOTERM_BP_FAT	GO:0045449~regulation of transcription	210	13.2492	0.00277957	10424413, 10506786, 10514158, 10424411, 10516296, 10405888, 10571680, 10396421, 10432972, 10573261, 10495316, 10352815, 10578615, 10500630, 10579125, 10358027, 10531707, 10477311, 10602164, 10405874, 10544788, 10351574, 10510473, 10442199, 10562005, 10544501, 10368888, 10405868, 10561085, 10500103, 10568731, 10467420, 10569994, 10382328, 10570131, 10462361, 10604393, 10520950, 10516590, 10514340,…	1073	2227	13588	1.19414	0.999023	0.0703578	4.78955
GOTERM_BP_FAT	GO:0051640~organelle localization	12	0.757098	0.0028619	10429699, 10350392, 10521090, 10460891, 10492598, 10385153, 10430201, 10460738, 10474381, 10382998, 10360985, 10474984	1073	54	13588	2.81412	0.999204	0.0716412	4.92805
GOTERM_BP_FAT	GO:0040029~regulation of gene expression, epigenetic	14	0.883281	0.00294796	10506786, 10603469, 10603431, 10391461, 10547088, 10452701, 10438313, 10574812, 10556113, 10472782, 10559276, 10462973, 10370824, 10534694, 10358454, 10591369	1073	70	13588	2.53271	0.999358	0.0729857	5.07264
GOTERM_BP_FAT	GO:0006350~transcription	171	10.7886	0.00298264	10413697, 10514158, 10452228, 10529330, 10608667, 10516296, 10367179, 10490653, 10405888, 10571680, 10484402, 10396421, 10574812, 10432972, 10573261, 10594404, 10399178, 10379346, 10352815, 10368970, 10578615, 10395910, 10344049, 10500630, 10579125, 10586039, 10358027, 10531707, 10477311, 10385686, 10602164, 10540472, 10405874, 10544788, 10351574, 10353010, 10442199, 10562005, 10544501, 10404774,…	1073	1772	13588	1.22205	0.999411	0.0730881	5.13084
GOTERM_BP_FAT	GO:0016569~covalent chromatin modification	17	1.07256	0.00328413	10458138, 10603431, 10517465, 10491860, 10526319, 10508042, 10372629, 10472782, 10435024, 10544501, 10390153, 10444524, 10379346, 10462973, 10370837, 10370824, 10479765	1073	96	13588	2.24251	0.999723	0.0794066	5.63542
GOTERM_BP_FAT	GO:0051168~nuclear export	8	0.504732	0.0040711	10427885, 10582599, 10444858, 10454411, 10476889, 10374590, 10492598, 10407993, 10427310, 10602173, 10597969, 10473650	1073	27	13588	3.75217	0.999961	0.0965887	6.94061
GOTERM_BP_FAT	GO:0045787~positive regulation of cell cycle	9	0.567823	0.00416825	10569994, 10462361, 10424413, 10582835, 10402750, 10497325, 10570470, 10360985, 10591881, 10407325, 10353341, 10386949, 10500543, 10553857, 10370837, 10453252, 10474984, 10496204, 10400153, 10429455, 10600545, 10382998, 10565589, 10552337, 10531274, 10527801, 10446679, 10566142, 10542038, 10385426, 10455439	1073	34	13588	3.35212	0.99997	0.0978519	7.10054
GOTERM_BP_FAT	GO:0007052~mitotic spindle organization	4	0.252366	0.00433783	10452709, 10483401, 10513818, 10463951, 10508986	1073	5	13588	10.1308	0.99998	0.100687	7.3791
GOTERM_BP_FAT	GO:0051253~negative regulation of RNA metabolic process	39	2.46057	0.00433986	10590325, 10424411, 10367179, 10405888, 10529273, 10432972, 10594404, 10383055, 10477942, 10379346, 10380689, 10538282, 10579125, 10602164, 10540472, 10385686, 10405874, 10521389, 10510473, 10404774, 10405868, 10444524, 10591369, 10568731, 10382328, 10603011, 10370721, 10544779, 10407993, 10454782, 10522944, 10462973, 10452633, 10550076, 10463140, 10410207, 10421573, 10338815, 10603431, 10517465,…	1073	310	13588	1.59316	0.99998	0.0998045	7.38242
GOTERM_BP_FAT	GO:0042770~DNA damage response, signal transduction	12	0.757098	0.00444153	10524266, 10464659, 10586184, 10592201, 10391461, 10527801, 10369815, 10547088, 10584710, 10602599, 10447395, 10560685	1073	57	13588	2.66601	0.999985	0.101094	7.54905
GOTERM_BP_FAT	GO:0031110~regulation of microtubule polymerization or depolymerization	8	0.504732	0.00506506	10603387, 10495316, 10379989, 10420426, 10542317, 10513818, 10603208, 10508986, 10542310, 10459755	1073	28	13588	3.61816	0.999997	0.113451	8.56474
GOTERM_BP_FAT	GO:0030163~protein catabolic process	62	3.91167	0.00517875	10443000, 10464728, 10395612, 10391461, 10506118, 10560260, 10341145, 10548699, 10541729, 10413316, 10413752, 10338354, 10350090, 10560672, 10588577, 10456296, 10374746, 10541307, 10541182, 10399036, 10339266, 10342779, 10574656, 10361110, 10515744, 10469965, 10562331, 10355582, 10490815, 10364287, 10594315, 10445702, 10603387, 10478572, 10451004, 10544186, 10524105, 10393774, 10387138, 10484999,…	1073	556	13588	1.41212	0.999998	0.114823	8.7488
GOTERM_BP_FAT	GO:0016570~histone modification	16	1.00946	0.00536464	10458138, 10603431, 10517465, 10491860, 10526319, 10508042, 10372629, 10472782, 10435024, 10544501, 10390153, 10444524, 10379346, 10370837, 10370824, 10479765	1073	92	13588	2.20236	0.999998	0.117659	9.049
GOTERM_BP_FAT	GO:0006793~phosphorus metabolic process	90	5.67823	0.00540004	10454414, 10460376, 10373530, 10360338, 10352767, 10562637, 10401343, 10491805, 10524266, 10427015, 10431393, 10494023, 10460891, 10377405, 10572235, 10504470, 10478326, 10486564, 10589420, 10556266, 10373467, 10595924, 10351163, 10405464, 10583215, 10530516, 10517243, 10449527, 10561388, 10435094, 10376733, 10452980, 10474769, 10420198, 10538939, 10443527, 10526319, 10470913, 10416037, 10513162,…	1073	866	13588	1.31607	0.999999	0.11736	9.10607
GOTERM_BP_FAT	GO:0006796~phosphate metabolic process	90	5.67823	0.00540004	10454414, 10460376, 10373530, 10360338, 10352767, 10562637, 10401343, 10491805, 10524266, 10427015, 10431393, 10494023, 10460891, 10377405, 10572235, 10504470, 10478326, 10486564, 10589420, 10556266, 10373467, 10595924, 10351163, 10405464, 10583215, 10530516, 10517243, 10449527, 10561388, 10435094, 10376733, 10452980, 10474769, 10420198, 10538939, 10443527, 10526319, 10470913, 10416037, 10513162,…	1073	866	13588	1.31607	0.999999	0.11736	9.10607
GOTERM_BP_FAT	GO:0007281~germ cell development	17	1.07256	0.00547978	10377662, 10571870, 10361375, 10539617, 10563303, 10518350, 10540191, 10506004, 10518352, 10447395, 10476252, 10590892, 10368888, 10539640, 10512411, 10410560, 10527801, 10444524, 10368370, 10510172, 10421488, 10539632, 10361956	1073	101	13588	2.13149	0.999999	0.117966	9.23448
GOTERM_BP_FAT	GO:0001556~oocyte maturation	5	0.315457	0.00549638	10361375, 10368888, 10410560, 10527801, 10476252	1073	10	13588	6.33178	0.999999	0.117292	9.26118
GOTERM_BP_FAT	GO:0006302~double-strand break repair	10	0.630915	0.0055863	10605674, 10435024, 10410560, 10527801, 10584710, 10474902, 10447395, 10583264, 10515257, 10528790	1073	43	13588	2.94501	0.999999	0.11809	9.40574
GOTERM_BP_FAT	GO:0045184~establishment of protein localization	71	4.4795	0.00558634	10380751, 10391963, 10492598, 10381744, 10524781, 10424411, 10497503, 10506680, 10606619, 10488237, 10453512, 10401114, 10476889, 10354054, 10350535, 10574033, 10383436, 10536746, 10406681, 10361651, 10420572, 10444858, 10461391, 10561388, 10358064, 10346634, 10396108, 10399036, 10372687, 10590892, 10591522, 10465282, 10585129, 10355967, 10360460, 10561527, 10534441, 10582599, 10350039, 10446149,…	1073	656	13588	1.3706	0.999999	0.117101	9.40581
GOTERM_BP_FAT	GO:0046907~intracellular transport	50	3.15457	0.00599041	10380751, 10454411, 10492598, 10508805, 10497503, 10449303, 10602173, 10606619, 10453512, 10476889, 10438308, 10350535, 10383436, 10406681, 10444858, 10461391, 10563303, 10358064, 10346634, 10427310, 10597969, 10590892, 10432986, 10591522, 10465282, 10585129, 10592342, 10433721, 10355967, 10360460, 10582599, 10446149, 10573490, 10374590, 10487930, 10407993, 10422854, 10427885, 10385052, 10499504,…	1073	431	13588	1.46909	1	0.124008	10.0527
GOTERM_BP_FAT	GO:0001836~release of cytochrome c from mitochondria	6	0.378549	0.00633427	10456357, 10464128, 10561388, 10563303, 10571696, 10449303	1073	16	13588	4.74884	1	0.129593	10.5998
GOTERM_BP_FAT	GO:0045892~negative regulation of transcription, DNA-dependent	38	2.39748	0.00669606	10590325, 10382328, 10603011, 10424411, 10370721, 10367179, 10405888, 10544779, 10454782, 10529273, 10432972, 10594404, 10477942, 10383055, 10522944, 10462973, 10379346, 10452633, 10463140, 10550076, 10380689, 10538282, 10421573, 10410207, 10579125, 10338815, 10603431, 10517465, 10405874, 10385686, 10540472, 10542445, 10602164, 10521389, 10510473, 10346549, 10501091, 10472782, 10603627, 10404774,…	1073	308	13588	1.56239	1	0.135386	11.172
GOTERM_BP_FAT	GO:0043193~positive regulation of gene-specific transcription	9	0.567823	0.0071825	10569994, 10462361, 10424413, 10582835, 10402750, 10497325, 10518350, 10518352, 10570470, 10591881, 10407325, 10353341, 10432972, 10386949, 10500543, 10495316, 10550076, 10553857, 10370837, 10453252, 10571870, 10400153, 10429455, 10600545, 10565589, 10385686, 10552337, 10501091, 10566142, 10542038, 10385426, 10512061, 10368370, 10455439, 10510172	1073	37	13588	3.08033	1	0.143356	11.936
GOTERM_BP_FAT	GO:0016481~negative regulation of transcription	44	2.77603	0.00723203	10538617, 10590325, 10424411, 10367179, 10405888, 10529273, 10432972, 10594404, 10383055, 10477942, 10379346, 10380689, 10538282, 10579125, 10405874, 10540472, 10602164, 10385686, 10521389, 10351574, 10510473, 10404774, 10405868, 10444524, 10591369, 10568731, 10382328, 10603011, 10359770, 10370721, 10544779, 10360985, 10409424, 10454782, 10522944, 10462973, 10452633, 10550076, 10463140, 10410207,…	1073	372	13588	1.49784	1	0.143132	12.0134
GOTERM_BP_FAT	GO:0008156~negative regulation of DNA replication	5	0.315457	0.00810316	10576140, 10586184, 10508151, 10527801, 10408321	1073	11	13588	5.75616	1	0.157757	13.3649
GOTERM_BP_FAT	GO:0045132~meiotic chromosome segregation	5	0.315457	0.00810316	10385325, 10389627, 10451805, 10427166, 10346365	1073	11	13588	5.75616	1	0.157757	13.3649
GOTERM_BP_FAT	GO:0034984~cellular response to DNA damage stimulus	5	0.315457	0.00810316	10385842, 10577866, 10546834, 10528840, 10583264	1073	11	13588	5.75616	1	0.157757	13.3649
GOTERM_BP_FAT	GO:0006268~DNA unwinding during replication	5	0.315457	0.00810316	10534974, 10437945, 10357436, 10546163, 10474902	1073	11	13588	5.75616	1	0.157757	13.3649
GOTERM_BP_FAT	GO:0030031~cell projection assembly	13	0.820189	0.00812865	10495416, 10382713, 10539617, 10508805, 10416777, 10539135, 10383289, 10382542, 10607806, 10490384, 10370127, 10539640, 10472820, 10539632, 10383472	1073	70	13588	2.3518	1	0.156995	13.4041
GOTERM_BP_FAT	GO:0051310~metaphase plate congression	4	0.252366	0.0081679	10385153, 10460738, 10474381, 10360985	1073	6	13588	8.44237	1	0.156487	13.4646
GOTERM_BP_FAT	GO:0010332~response to gamma radiation	6	0.378549	0.0083996	10524266, 10563303, 10527801, 10414514, 10449303, 10528790	1073	17	13588	4.46949	1	0.159351	13.8203
GOTERM_BP_FAT	GO:0008584~male gonad development	9	0.567823	0.00995302	10382328, 10571870, 10563303, 10518350, 10518352, 10582501, 10447395, 10425801, 10368370, 10475866, 10510172, 10361956, 10421488	1073	39	13588	2.92236	1	0.184666	16.1701
GOTERM_BP_FAT	GO:0016310~phosphorylation	75	4.73186	0.0100281	10454414, 10373530, 10360338, 10352767, 10562637, 10401343, 10491805, 10524266, 10427015, 10431393, 10494023, 10460891, 10377405, 10572235, 10504470, 10478326, 10486564, 10556266, 10373467, 10595924, 10351163, 10405464, 10530516, 10517243, 10449527, 10435094, 10376733, 10452980, 10474769, 10420198, 10538939, 10443527, 10526319, 10470913, 10416037, 10499536, 10407126, 10587508, 10562563, 10490104,…	1073	718	13588	1.3228	1	0.184564	16.2821
GOTERM_BP_FAT	GO:0015031~protein transport	69	4.35331	0.0100308	10380751, 10391963, 10492598, 10381744, 10524781, 10424411, 10497503, 10506680, 10606619, 10488237, 10453512, 10401114, 10476889, 10354054, 10350535, 10574033, 10383436, 10536746, 10406681, 10361651, 10420572, 10444858, 10461391, 10561388, 10358064, 10346634, 10396108, 10399036, 10372687, 10590892, 10591522, 10465282, 10585129, 10355967, 10360460, 10561527, 10534441, 10582599, 10350039, 10446149,…	1073	651	13588	1.34222	1	0.183267	16.2862
GOTERM_BP_FAT	GO:0006730~one-carbon metabolic process	18	1.13565	0.0101969	10367641, 10488816, 10386604, 10406581, 10603431, 10547088, 10490903, 10517465, 10439762, 10574812, 10365971, 10344713, 10583610, 10544501, 10545672, 10444524, 10462973, 10379346, 10479765, 10591369	1073	117	13588	1.94824	1	0.184672	16.5335
GOTERM_BP_FAT	GO:0006298~mismatch repair	5	0.315457	0.0114055	10450384, 10354542, 10352048, 10527268, 10447395	1073	12	13588	5.27648	1	0.202832	18.3125
GOTERM_BP_FAT	GO:0032508~DNA duplex unwinding	5	0.315457	0.0114055	10534974, 10437945, 10357436, 10546163, 10474902	1073	12	13588	5.27648	1	0.202832	18.3125
GOTERM_BP_FAT	GO:0008637~apoptotic mitochondrial changes	7	0.44164	0.0114426	10412100, 10456357, 10464128, 10561388, 10563303, 10571696, 10449303	1073	25	13588	3.5458	1	0.201994	18.3664
GOTERM_BP_FAT	GO:0010212~response to ionizing radiation	10	0.630915	0.0116685	10524266, 10456357, 10563303, 10435024, 10527801, 10414514, 10449303, 10447395, 10515257, 10528790	1073	48	13588	2.63824	1	0.204134	18.6949
GOTERM_BP_FAT	GO:0008283~cell proliferation	31	1.95584	0.0118114	10590325, 10382328, 10534974, 10604393, 10539617, 10540191, 10449303, 10568714, 10476989, 10605674, 10350392, 10539640, 10446074, 10462973, 10352815, 10361956, 10429699, 10563303, 10456296, 10478799, 10569071, 10517465, 10443527, 10365260, 10521090, 10563780, 10527801, 10515337, 10433721, 10432511, 10539632, 10534694, 10399087	1073	247	13588	1.58935	1	0.204946	18.9019
GOTERM_BP_FAT	GO:0016458~gene silencing	11	0.694006	0.0128268	10506786, 10603469, 10603431, 10578193, 10438313, 10556113, 10472782, 10559276, 10462973, 10370824, 10358454, 10534694, 10591369	1073	57	13588	2.44384	1	0.219072	20.3587
GOTERM_BP_FAT	GO:0031570~DNA integrity checkpoint	8	0.504732	0.0129486	10576140, 10464659, 10586184, 10508151, 10592201, 10369815, 10584710, 10447395	1073	33	13588	3.06995	1	0.21943	20.5319
GOTERM_BP_FAT	GO:0046605~regulation of centrosome cycle	4	0.252366	0.0134608	10374590, 10438308, 10456439, 10456488, 10491805, 10456490	1073	7	13588	7.23632	1	0.225583	21.2559
GOTERM_BP_FAT	GO:0007094~mitotic cell cycle spindle assembly checkpoint	4	0.252366	0.0134608	10496204, 10451220, 10456439, 10456488, 10538832, 10456490	1073	7	13588	7.23632	1	0.225583	21.2559
GOTERM_BP_FAT	GO:0045841~negative regulation of mitotic metaphase/anaphase transition	4	0.252366	0.0134608	10496204, 10451220, 10456439, 10456488, 10538832, 10456490	1073	7	13588	7.23632	1	0.225583	21.2559
GOTERM_BP_FAT	GO:0043068~positive regulation of programmed cell death	31	1.95584	0.0138387	10464659, 10456357, 10514340, 10464128, 10391461, 10581181, 10568355, 10354588, 10449303, 10560685, 10503711, 10432972, 10477994, 10425801, 10577655, 10571696, 10427606, 10475866, 10384223, 10355329, 10429699, 10443463, 10563303, 10420198, 10547088, 10422179, 10537728, 10371846, 10351574, 10527801, 10368888	1073	250	13588	1.57028	1	0.229639	21.7861
GOTERM_BP_FAT	GO:0051170~nuclear import	11	0.694006	0.0144366	10454411, 10358064, 10346634, 10525983, 10374590, 10497503, 10478799, 10427310, 10597969, 10602173, 10590892, 10427885, 10385052, 10453512, 10465282, 10350535, 10392284	1073	58	13588	2.40171	1	0.236787	22.618
GOTERM_BP_FAT	GO:0032583~regulation of gene-specific transcription	12	0.757098	0.0150829	10569994, 10462361, 10424413, 10582835, 10402750, 10367179, 10497325, 10518350, 10518352, 10570470, 10591881, 10407325, 10353341, 10432972, 10386949, 10500543, 10495316, 10550076, 10553857, 10370837, 10453252, 10571870, 10400153, 10429455, 10600545, 10517465, 10565589, 10385686, 10552337, 10603627, 10501091, 10566142, 10542038, 10385426, 10512061, 10368370, 10455439, 10510172	1073	67	13588	2.2681	1	0.244455	23.5079
GOTERM_BP_FAT	GO:0042981~regulation of apoptosis	59	3.7224	0.0152544	10395612, 10391461, 10581181, 10568355, 10449303, 10396421, 10432972, 10477994, 10373467, 10528790, 10429699, 10589004, 10563303, 10420198, 10427454, 10456296, 10569071, 10538939, 10444719, 10443527, 10371846, 10365971, 10351574, 10368888, 10507112, 10418096, 10561527, 10382328, 10464659, 10456357, 10464128, 10514340, 10542317, 10354588, 10360985, 10560685, 10503711, 10425801, 10575052, 10577655,…	1073	553	13588	1.35109	1	0.245306	23.7425
GOTERM_BP_FAT	GO:0010942~positive regulation of cell death	31	1.95584	0.0153398	10464659, 10456357, 10514340, 10464128, 10391461, 10581181, 10568355, 10354588, 10449303, 10560685, 10503711, 10432972, 10477994, 10425801, 10577655, 10571696, 10427606, 10475866, 10384223, 10355329, 10429699, 10443463, 10563303, 10420198, 10547088, 10422179, 10537728, 10371846, 10351574, 10527801, 10368888	1073	252	13588	1.55782	1	0.244945	23.859
GOTERM_BP_FAT	GO:0000724~double-strand break repair via homologous recombination	5	0.315457	0.0154623	10527801, 10584710, 10474902, 10515257, 10528790	1073	13	13588	4.8706	1	0.245102	24.0258
GOTERM_BP_FAT	GO:0000725~recombinational repair	5	0.315457	0.0154623	10527801, 10584710, 10474902, 10515257, 10528790	1073	13	13588	4.8706	1	0.245102	24.0258
GOTERM_BP_FAT	GO:0009314~response to radiation	20	1.26183	0.0171293	10464659, 10586184, 10456357, 10464128, 10443463, 10563303, 10546834, 10506118, 10547088, 10602599, 10449303, 10447395, 10524266, 10527801, 10512411, 10435024, 10490815, 10571696, 10414514, 10515257, 10528790	1073	143	13588	1.77113	1	0.266192	26.2625
GOTERM_BP_FAT	GO:0051320~S phase	3	0.189274	0.0176768	10504730, 10605674, 10350504, 10582981	1073	3	13588	12.6636	1	0.271819	26.9833
GOTERM_BP_FAT	GO:0045005~maintenance of fidelity during DNA-dependent DNA replication	3	0.189274	0.0176768	10586184, 10527801, 10562818	1073	3	13588	12.6636	1	0.271819	26.9833
GOTERM_BP_FAT	GO:0000084~S phase of mitotic cell cycle	3	0.189274	0.0176768	10504730, 10605674, 10350504, 10582981	1073	3	13588	12.6636	1	0.271819	26.9833
GOTERM_BP_FAT	GO:0031055~chromatin remodeling at centromere	3	0.189274	0.0176768	10386909, 10356461, 10462973	1073	3	13588	12.6636	1	0.271819	26.9833
GOTERM_BP_FAT	GO:0016573~histone acetylation	8	0.504732	0.017772	10508042, 10372629, 10458138, 10472782, 10390153, 10491860, 10370824, 10370837	1073	35	13588	2.89453	1	0.271428	27.1081
GOTERM_BP_FAT	GO:0043067~regulation of programmed cell death	59	3.7224	0.0196381	10395612, 10391461, 10581181, 10568355, 10449303, 10396421, 10432972, 10477994, 10373467, 10528790, 10429699, 10589004, 10563303, 10420198, 10427454, 10456296, 10569071, 10538939, 10444719, 10443527, 10371846, 10365971, 10351574, 10368888, 10507112, 10418096, 10561527, 10382328, 10464659, 10456357, 10464128, 10514340, 10542317, 10354588, 10360985, 10560685, 10503711, 10425801, 10575052, 10577655,…	1073	560	13588	1.3342	1	0.293748	29.5117
GOTERM_BP_FAT	GO:0034504~protein localization in nucleus	11	0.694006	0.0201719	10358064, 10346634, 10525983, 10374590, 10497503, 10396511, 10478799, 10590892, 10385052, 10465282, 10453512, 10350535, 10392284	1073	61	13588	2.28359	1	0.298711	30.1854
GOTERM_BP_FAT	GO:0051784~negative regulation of nuclear division	4	0.252366	0.0202877	10496204, 10451220, 10456439, 10456488, 10538832, 10456490	1073	8	13588	6.33178	1	0.298416	30.3307
GOTERM_BP_FAT	GO:0045839~negative regulation of mitosis	4	0.252366	0.0202877	10496204, 10451220, 10456439, 10456488, 10538832, 10456490	1073	8	13588	6.33178	1	0.298416	30.3307
GOTERM_BP_FAT	GO:0006473~protein amino acid acetylation	8	0.504732	0.0206044	10508042, 10372629, 10458138, 10472782, 10390153, 10491860, 10370824, 10370837	1073	36	13588	2.81412	1	0.300594	30.7269
GOTERM_BP_FAT	GO:0043065~positive regulation of apoptosis	30	1.89274	0.0210979	10464659, 10456357, 10514340, 10464128, 10391461, 10581181, 10568355, 10354588, 10449303, 10560685, 10503711, 10432972, 10477994, 10425801, 10577655, 10571696, 10427606, 10475866, 10384223, 10355329, 10429699, 10563303, 10420198, 10547088, 10422179, 10537728, 10371846, 10351574, 10527801, 10368888	1073	248	13588	1.53188	1	0.30488	31.3398
GOTERM_BP_FAT	GO:0043967~histone H4 acetylation	6	0.378549	0.0212386	10508042, 10372629, 10458138, 10390153, 10491860, 10370837	1073	21	13588	3.61816	1	0.304852	31.5135
GOTERM_BP_FAT	GO:0010941~regulation of cell death	59	3.7224	0.0212645	10395612, 10391461, 10581181, 10568355, 10449303, 10396421, 10432972, 10477994, 10373467, 10528790, 10429699, 10589004, 10563303, 10420198, 10427454, 10456296, 10569071, 10538939, 10444719, 10443527, 10371846, 10365971, 10351574, 10368888, 10507112, 10418096, 10561527, 10382328, 10464659, 10456357, 10464128, 10514340, 10542317, 10354588, 10360985, 10560685, 10503711, 10425801, 10575052, 10577655,…	1073	563	13588	1.32709	1	0.303453	31.5455
GOTERM_BP_FAT	GO:0046546~development of primary male sexual characteristics	10	0.630915	0.0217016	10382328, 10571870, 10563303, 10518350, 10518352, 10447395, 10582501, 10420362, 10425801, 10368370, 10475866, 10510172, 10361956, 10421488	1073	53	13588	2.38935	1	0.306953	32.0825
GOTERM_BP_FAT	GO:0010639~negative regulation of organelle organization	11	0.694006	0.0224094	10603387, 10496204, 10430071, 10603208, 10538832, 10539135, 10595000, 10500928, 10451220, 10456488, 10456439, 10513818, 10456490, 10508986	1073	62	13588	2.24676	1	0.313554	32.9439
GOTERM_BP_FAT	GO:0001824~blastocyst development	10	0.630915	0.0242819	10476989, 10483633, 10395612, 10527801, 10575052, 10580282, 10515337, 10427214, 10576728, 10399087	1073	54	13588	2.3451	1	0.333258	35.1729
GOTERM_BP_FAT	GO:0030183~B cell differentiation	9	0.567823	0.0259644	10460385, 10483633, 10563303, 10456296, 10449303, 10447395, 10560685, 10370837, 10579872	1073	46	13588	2.47765	1	0.350113	37.116
GOTERM_BP_FAT	GO:0006997~nucleus organization	9	0.567823	0.0259644	10571870, 10377681, 10563303, 10396511, 10518350, 10518352, 10371846, 10486564, 10518957, 10571696, 10368370, 10510172, 10361956	1073	46	13588	2.47765	1	0.350113	37.116
GOTERM_BP_FAT	GO:0007143~female meiosis	5	0.315457	0.0260187	10460376, 10389627, 10361375, 10410560, 10476252	1073	15	13588	4.22119	1	0.348871	37.1778
GOTERM_BP_FAT	GO:0035196~gene silencing by miRNA, production of miRNAs	4	0.252366	0.0286736	10556113, 10506786, 10603469, 10438313, 10534694, 10358454	1073	9	13588	5.62825	1	0.375244	40.1298
GOTERM_BP_FAT	GO:0016446~somatic hypermutation of immunoglobulin genes	4	0.252366	0.0286736	10352048, 10524450, 10527268, 10447395	1073	9	13588	5.62825	1	0.375244	40.1298
GOTERM_BP_FAT	GO:0002566~somatic diversification of immune receptors via somatic mutation	4	0.252366	0.0286736	10352048, 10524450, 10527268, 10447395	1073	9	13588	5.62825	1	0.375244	40.1298
GOTERM_BP_FAT	GO:0045736~negative regulation of cyclin-dependent protein kinase activity	4	0.252366	0.0286736	10443463, 10514340, 10542317, 10571696, 10542310	1073	9	13588	5.62825	1	0.375244	40.1298
GOTERM_BP_FAT	GO:0007131~reciprocal meiotic recombination	4	0.252366	0.0286736	10389627, 10410560, 10588294, 10474902	1073	9	13588	5.62825	1	0.375244	40.1298
GOTERM_BP_FAT	GO:0048232~male gamete generation	30	1.89274	0.0293318	10364752, 10539617, 10431486, 10458285, 10518350, 10540191, 10518352, 10425801, 10539640, 10457640, 10561017, 10584710, 10475866, 10507817, 10361956, 10571870, 10377662, 10389627, 10586039, 10563303, 10546834, 10493990, 10506004, 10404069, 10460177, 10524790, 10590892, 10470788, 10527801, 10512411, 10410560, 10444524, 10368370, 10432511, 10510172, 10421488, 10539632	1073	255	13588	1.48983	1	0.380133	40.8412
GOTERM_BP_FAT	GO:0007283~spermatogenesis	30	1.89274	0.0293318	10364752, 10539617, 10431486, 10458285, 10518350, 10540191, 10518352, 10425801, 10539640, 10457640, 10561017, 10584710, 10475866, 10507817, 10361956, 10571870, 10377662, 10389627, 10586039, 10563303, 10546834, 10493990, 10506004, 10404069, 10460177, 10524790, 10590892, 10470788, 10527801, 10512411, 10410560, 10444524, 10368370, 10432511, 10510172, 10421488, 10539632	1073	255	13588	1.48983	1	0.380133	40.8412
GOTERM_BP_FAT	GO:0006606~protein import into nucleus	10	0.630915	0.0300828	10385052, 10453512, 10465282, 10374590, 10525983, 10346634, 10358064, 10350535, 10497503, 10478799, 10392284, 10590892	1073	56	13588	2.26135	1	0.385864	41.6431
GOTERM_BP_FAT	GO:0007276~gamete generation	37	2.33438	0.0305625	10364752, 10539617, 10431486, 10458285, 10518350, 10540191, 10518352, 10425801, 10539640, 10457640, 10561017, 10584710, 10507817, 10475866, 10361956, 10450384, 10571870, 10377662, 10389627, 10586039, 10361375, 10563303, 10546834, 10540738, 10493990, 10506004, 10374746, 10404069, 10460177, 10524790, 10447395, 10590892, 10476252, 10470788, 10527801, 10512411, 10368888, 10410560, 10444524, 10368370,…	1073	331	13588	1.41556	1	0.388768	42.1499
GOTERM_BP_FAT	GO:0001701~in utero embryonic development	31	1.95584	0.0311822	10395612, 10562637, 10497590, 10425341, 10491805, 10396421, 10476989, 10427015, 10515836, 10380210, 10594404, 10391036, 10483633, 10430201, 10575052, 10580282, 10586844, 10594774, 10427214, 10368970, 10475866, 10528790, 10579125, 10517465, 10447395, 10366457, 10527801, 10507112, 10515337, 10411739, 10576728, 10370824, 10399087	1073	267	13588	1.4703	1	0.393008	42.7985
GOTERM_BP_FAT	GO:0048610~reproductive cellular process	22	1.38801	0.0315442	10382328, 10590325, 10539617, 10540191, 10518350, 10518352, 10539640, 10361956, 10377662, 10571870, 10555620, 10361375, 10563303, 10506004, 10447395, 10476252, 10499906, 10590892, 10368888, 10527801, 10410560, 10512411, 10444524, 10594315, 10368370, 10510172, 10421488, 10539632	1073	173	13588	1.61039	1	0.394653	43.1742
GOTERM_BP_FAT	GO:0007163~establishment or maintenance of cell polarity	7	0.44164	0.0318122	10376690, 10429699, 10447602, 10465649, 10385153, 10430201, 10396511	1073	31	13588	2.85951	1	0.395361	43.4509
GOTERM_BP_FAT	GO:0048609~reproductive process in a multicellular organism	44	2.77603	0.0324658	10364752, 10539617, 10458285, 10580282, 10427214, 10507817, 10361956, 10586039, 10563303, 10540738, 10493990, 10374746, 10538939, 10404069, 10490352, 10590892, 10410560, 10368888, 10444524, 10510172, 10421488, 10539632, 10431486, 10540191, 10518350, 10518352, 10425801, 10483633, 10539640, 10457640, 10561017, 10584710, 10475866, 10450384, 10389627, 10377662, 10571870, 10555620, 10361375, 10546834,…	1073	409	13588	1.36234	1	0.39977	44.1203
GOTERM_BP_FAT	GO:0032504~multicellular organism reproduction	44	2.77603	0.0324658	10364752, 10539617, 10458285, 10580282, 10427214, 10507817, 10361956, 10586039, 10563303, 10540738, 10493990, 10374746, 10538939, 10404069, 10490352, 10590892, 10410560, 10368888, 10444524, 10510172, 10421488, 10539632, 10431486, 10540191, 10518350, 10518352, 10425801, 10483633, 10539640, 10457640, 10561017, 10584710, 10475866, 10450384, 10389627, 10377662, 10571870, 10555620, 10361375, 10546834,…	1073	409	13588	1.36234	1	0.39977	44.1203
GOTERM_BP_FAT	GO:0000079~regulation of cyclin-dependent protein kinase activity	5	0.315457	0.0325802	10443463, 10514340, 10542317, 10446679, 10571696, 10542310	1073	16	13588	3.95736	1	0.398969	44.2366
GOTERM_BP_FAT	GO:0043543~protein amino acid acylation	9	0.567823	0.0327106	10508042, 10372629, 10458138, 10472782, 10390153, 10491860, 10606235, 10370824, 10370837	1073	48	13588	2.37442	1	0.398329	44.3691
GOTERM_BP_FAT	GO:0006401~RNA catabolic process	9	0.567823	0.0327106	10367252, 10539177, 10543080, 10517421, 10506786, 10444595, 10541067, 10442435, 10493210, 10363575, 10510365	1073	48	13588	2.37442	1	0.398329	44.3691
GOTERM_BP_FAT	GO:0046661~male sex differentiation	10	0.630915	0.0333183	10382328, 10571870, 10563303, 10518350, 10518352, 10447395, 10582501, 10420362, 10425801, 10368370, 10475866, 10510172, 10361956, 10421488	1073	57	13588	2.22168	1	0.402194	44.9821
GOTERM_BP_FAT	GO:0000076~DNA replication checkpoint	3	0.189274	0.0335101	10576140, 10586184, 10508151	1073	4	13588	9.49767	1	0.40212	45.1743
GOTERM_BP_FAT	GO:0006301~postreplication repair	3	0.189274	0.0335101	10451225, 10354085, 10447395	1073	4	13588	9.49767	1	0.40212	45.1743
GOTERM_BP_FAT	GO:0007144~female meiosis I	3	0.189274	0.0335101	10361375, 10410560, 10476252	1073	4	13588	9.49767	1	0.40212	45.1743
GOTERM_BP_FAT	GO:0051293~establishment of spindle localization	3	0.189274	0.0335101	10385153, 10430201, 10474984	1073	4	13588	9.49767	1	0.40212	45.1743
GOTERM_BP_FAT	GO:0051567~histone H3-K9 methylation	3	0.189274	0.0335101	10603431, 10444524, 10479765	1073	4	13588	9.49767	1	0.40212	45.1743
GOTERM_BP_FAT	GO:0007020~microtubule nucleation	3	0.189274	0.0335101	10420320, 10456439, 10456488, 10433721, 10456490	1073	4	13588	9.49767	1	0.40212	45.1743
GOTERM_BP_FAT	GO:0032297~negative regulation of DNA replication initiation	3	0.189274	0.0335101	10576140, 10586184, 10508151	1073	4	13588	9.49767	1	0.40212	45.1743
GOTERM_BP_FAT	GO:0034453~microtubule anchoring	3	0.189274	0.0335101	10496204, 10359890, 10441620	1073	4	13588	9.49767	1	0.40212	45.1743
GOTERM_BP_FAT	GO:0000212~meiotic spindle organization	3	0.189274	0.0335101	10427166, 10361375, 10430201	1073	4	13588	9.49767	1	0.40212	45.1743
GOTERM_BP_FAT	GO:0007080~mitotic metaphase plate congression	3	0.189274	0.0335101	10385153, 10460738, 10474381	1073	4	13588	9.49767	1	0.40212	45.1743
GOTERM_BP_FAT	GO:0051653~spindle localization	3	0.189274	0.0335101	10385153, 10430201, 10474984	1073	4	13588	9.49767	1	0.40212	45.1743
GOTERM_BP_FAT	GO:0010216~maintenance of DNA methylation	3	0.189274	0.0335101	10574812, 10462973, 10591369	1073	4	13588	9.49767	1	0.40212	45.1743
GOTERM_BP_FAT	GO:0006269~DNA replication, synthesis of RNA primer	3	0.189274	0.0335101	10367076, 10353733, 10578557	1073	4	13588	9.49767	1	0.40212	45.1743
GOTERM_BP_FAT	GO:0010552~positive regulation of specific transcription from RNA polymerase II promoter	6	0.378549	0.0364902	10569994, 10462361, 10424413, 10582835, 10402750, 10497325, 10518350, 10518352, 10570470, 10591881, 10407325, 10353341, 10432972, 10386949, 10500543, 10553857, 10453252, 10370837, 10571870, 10400153, 10429455, 10600545, 10565589, 10552337, 10501091, 10566142, 10542038, 10385426, 10512061, 10368370, 10455439, 10510172	1073	24	13588	3.16589	1	0.427413	48.0799
GOTERM_BP_FAT	GO:0016180~snRNA processing	4	0.252366	0.0386066	10461274, 10420694, 10352735, 10511207	1073	10	13588	5.06542	1	0.444028	50.0546
GOTERM_BP_FAT	GO:0016073~snRNA metabolic process	4	0.252366	0.0386066	10461274, 10420694, 10352735, 10511207	1073	10	13588	5.06542	1	0.444028	50.0546
GOTERM_BP_FAT	GO:0060216~definitive hemopoiesis	4	0.252366	0.0386066	10483633, 10574632, 10427214, 10544788	1073	10	13588	5.06542	1	0.444028	50.0546
GOTERM_BP_FAT	GO:0031050~dsRNA fragmentation	4	0.252366	0.0386066	10556113, 10506786, 10603469, 10438313, 10534694, 10358454	1073	10	13588	5.06542	1	0.444028	50.0546
GOTERM_BP_FAT	GO:0048599~oocyte development	5	0.315457	0.0400203	10361375, 10368888, 10410560, 10527801, 10476252	1073	17	13588	3.72458	1	0.454119	51.3339
GOTERM_BP_FAT	GO:0022613~ribonucleoprotein complex biogenesis	18	1.13565	0.0414052	10375880, 10514340, 10346634, 10358064, 10541067, 10492598, 10575550, 10541091, 10547758, 10547251, 10578193, 10407993, 10471191, 10539177, 10444595, 10447097, 10488929, 10430265, 10498168, 10510365	1073	137	13588	1.66383	1	0.46369	52.5571
GOTERM_BP_FAT	GO:0012501~programmed cell death	49	3.09148	0.0422389	10590325, 10395612, 10539617, 10581181, 10568355, 10449303, 10477994, 10577508, 10429699, 10579125, 10563303, 10561388, 10474769, 10452980, 10396108, 10456296, 10420198, 10538939, 10444719, 10573461, 10371846, 10351574, 10565570, 10594315, 10539632, 10463173, 10456357, 10536294, 10514340, 10464128, 10472235, 10535502, 10354588, 10503711, 10569181, 10511290, 10539640, 10428561, 10571696, 10518957,…	1073	473	13588	1.31187	1	0.468537	53.2794
GOTERM_BP_FAT	GO:0034470~ncRNA processing	20	1.26183	0.0427207	10375880, 10576124, 10506786, 10514340, 10541067, 10575550, 10461274, 10547758, 10420694, 10352735, 10578193, 10471191, 10438313, 10583634, 10539177, 10511207, 10585703, 10498168, 10404597, 10510365, 10534694	1073	158	13588	1.60298	1	0.470463	53.6921
GOTERM_BP_FAT	GO:0008219~cell death	52	3.28076	0.0429175	10590325, 10539617, 10395612, 10581181, 10568355, 10449303, 10477994, 10577508, 10429699, 10579125, 10563303, 10561388, 10474769, 10452980, 10396108, 10456296, 10420198, 10538939, 10444719, 10573461, 10371846, 10351574, 10565570, 10594315, 10539632, 10463173, 10536294, 10456357, 10514340, 10464128, 10472235, 10535502, 10354588, 10503711, 10569181, 10511290, 10539640, 10428561, 10571696, 10518957,…	1073	507	13588	1.29883	1	0.470081	53.8597
GOTERM_BP_FAT	GO:0008406~gonad development	13	0.820189	0.0431258	10382328, 10571870, 10563303, 10518350, 10518352, 10582501, 10447395, 10490352, 10425801, 10368888, 10512411, 10527801, 10368370, 10475866, 10510172, 10421488, 10361956	1073	88	13588	1.87075	1	0.469797	54.0365
GOTERM_BP_FAT	GO:0010551~regulation of specific transcription from RNA polymerase II promoter	9	0.567823	0.0449177	10569994, 10462361, 10424413, 10582835, 10402750, 10367179, 10497325, 10518350, 10518352, 10570470, 10591881, 10407325, 10353341, 10432972, 10386949, 10500543, 10553857, 10453252, 10370837, 10571870, 10400153, 10429455, 10600545, 10517465, 10565589, 10552337, 10603627, 10501091, 10566142, 10542038, 10385426, 10512061, 10368370, 10455439, 10510172	1073	51	13588	2.23475	1	0.481944	55.5308
GOTERM_BP_FAT	GO:0006915~apoptosis	48	3.02839	0.0466762	10590325, 10395612, 10539617, 10581181, 10568355, 10449303, 10477994, 10577508, 10429699, 10563303, 10561388, 10452980, 10474769, 10396108, 10456296, 10420198, 10444719, 10538939, 10573461, 10371846, 10351574, 10565570, 10594315, 10539632, 10463173, 10456357, 10536294, 10514340, 10464128, 10472235, 10535502, 10354588, 10503711, 10569181, 10511290, 10539640, 10428561, 10518957, 10571696, 10553521,…	1073	465	13588	1.30721	1	0.493451	56.9526
GOTERM_BP_FAT	GO:0016447~somatic recombination of immunoglobulin gene segments	5	0.315457	0.0483438	10352048, 10524450, 10527268, 10447395, 10370837	1073	18	13588	3.51766	1	0.503931	58.2613
GOTERM_BP_FAT	GO:0009994~oocyte differentiation	5	0.315457	0.0483438	10361375, 10368888, 10410560, 10527801, 10476252	1073	18	13588	3.51766	1	0.503931	58.2613
GOTERM_BP_FAT	GO:0010948~negative regulation of cell cycle process	5	0.315457	0.0483438	10496204, 10451220, 10456439, 10456488, 10430071, 10538832, 10456490	1073	18	13588	3.51766	1	0.503931	58.2613
GOTERM_BP_FAT	GO:0008285~negative regulation of cell proliferation	26	1.64038	0.049165	10544732, 10456357, 10514340, 10366277, 10424411, 10542317, 10364683, 10514347, 10432972, 10514466, 10577655, 10571696, 10352815, 10452633, 10413752, 10569335, 10384223, 10443463, 10563303, 10452980, 10515090, 10365971, 10424188, 10569341, 10592342, 10552740, 10568731, 10542310	1073	224	13588	1.46988	1	0.507974	58.8918
GOTERM_BP_FAT	GO:0010638~positive regulation of organelle organization	9	0.567823	0.0495711	10412100, 10496204, 10531274, 10438308, 10495316, 10542317, 10347297, 10491805, 10542310, 10474984	1073	52	13588	2.19177	1	0.508953	59.2003
GOTERM_BP_FAT	GO:0051495~positive regulation of cytoskeleton organization	6	0.378549	0.0496204	10412100, 10496204, 10495316, 10542317, 10347297, 10491805, 10542310	1073	26	13588	2.92236	1	0.507353	59.2376
GOTERM_BP_FAT	GO:0000184~nuclear-transcribed mRNA catabolic process, nonsense-mediated decay	6	0.378549	0.0496204	10367252, 10539177, 10543080, 10517421, 10541067, 10442435, 10493210, 10510365	1073	26	13588	2.92236	1	0.507353	59.2376
GOTERM_BP_FAT	GO:0048608~reproductive structure development	17	1.07256	0.049855	10590325, 10382328, 10571870, 10563303, 10518350, 10518352, 10449303, 10582501, 10447395, 10490352, 10432972, 10425801, 10368888, 10512411, 10527801, 10368370, 10594315, 10475866, 10510172, 10421488, 10361956	1073	130	13588	1.656	1	0.507098	59.4146
