# Supplementary material for: In Vivo Disruption of an Rb–E2F–Ezh2 Signaling Loop Causes Bladder Cancer
Source: Oxford University Press journal article supplement (doi:10.1158/0008-5472.can-14-1218), 2014-09-25
Supplement: 00085472can141218-sup-130432_2_supp_2585849_n9gpn1.xlsx [file 00085472can141218-sup-130432_2_supp_2585849_n9gpn1.xlsx]

## Sheet: Hoja1
Term	Overlap	P-value	Adjusted P-value	Z-score	Combined Score	Genes
CREM	670/5772	6.9336e-140	1.65713e-137	-0.700935	220.759	EIF2AK3;GSTCD;RCC1;MYBL2;XAB2;BRI3BP;PARP2;ANP32B;GLCCI1;ARHGEF11;EIF4A3;FANCD2;EIF4A1;DOM3Z;SSRP1;AIMP2;WHSC1L1;PSAT1;CDKN2A;CDKN2B;CDKN2C;ZFP687;HIF1A;MEAF6;SETD1A;CXXC1;MPRIP;CDKN1A;FBXO34;E2F1;HP1BP3;HINT1;E2F7;CCHCR1;ACAD9;FRYL;SNX27;SLBP;GCA;ANAPC2;WNK1;BAZ1B;FUS;NEK2;STK17B;AEBP2;ALMS1;SUPT16H;GPR160;MITD1;SENP1;ZFP64;NCAPH;MDC1;NCAPG;NOP58;MKRN1;CEP72;SLC25A28;MCOLN1;CSNK1G1;2510012J08RIK…
MYC	542/3863	5.30093e-138	6.33461e-136	-1.20324	374.575	SART3;PPP1CA;GSTCD;RCC1;MYBL2;XAB2;LASP1;PARP2;ANP32B;EIF4A1;ESRP1;SSRP1;AIMP2;WHSC1L1;PASK;ZFP687;HIF1A;CXXC1;CDKN1A;E2F1;HINT1;E2F8;2310036O22RIK;TMC8;SLBP;WWP2;WNK1;BAZ1B;CDCA7L;FUS;NEK2;ALMS1;SUPT16H;MITD1;SENP1;ZFP64;NCAPH;MDC1;CTDNEP1;SLC16A6;NOP58;MKRN1;SLC25A28;MRPS10;PELP1;2610318N02RIK;SLC25A13;TMPO;HAT1;CEP57;TUBGCP2;CTNNB1;NUBP1;GMEB2;RRM2;RRM1;QTRT1;DOT1L;BARD1;CAPZA1;SLMO2;DCTPP1;TM…
KDM5B	506/3720	4.04601e-122	2.41749e-120	-0.888319	244.668	SART3;EIF2AK3;MYBL1;XAB2;PARP2;EIF4A3;FANCD2;MTMR2;WHSC1L1;PSAT1;PASK;CDKN2A;CDKN2C;HIF1A;ATP9A;SETD1A;NR2C2;HP1BP3;HINT1;SLBP;WWP2;WNK1;BAZ1B;FUS;CRAMP1L;AEBP2;DHFR;SUPT16H;SENP1;ZFP64;NCAPH;NCAPG;MDC1;TEX9;CTDNEP1;NOP58;MKRN1;CSNK1G1;PELP1;PPIH;SLC25A13;5830418K08RIK;TMPO;ARHGAP19;PCBP2;TNIP1;ZMIZ2;HAT1;TUBGCP3;CEP57;CTNNB1;PTPRR;PRRC2C;NAA38;RANBP17;NPLOC4;MKI67;LSM14A;PWWP2A;RRM1;UEVLD;F63004…
E2F1	528/4167	5.13058e-117	2.45242e-115	-1.05311	277.915	SART3;EIF2AK2;RCC1;MYBL2;LASP1;PARP2;EIF4A1;SCML2;DOM3Z;AIMP2;PSAT1;PACSIN3;ZFP687;HIF1A;ATP9A;ERCC6L;2810417H13RIK;CDKN1A;HP1BP3;E2F7;E2F8;2310036O22RIK;ACAD9;FRYL;TMC8;SNX27;SLBP;GCA;WNK1;CDCA7L;FUS;STK17B;VRK1;ALMS1;DHFR;SENP1;NOP58;MKRN1;CEP72;CSNK1G1;2510012J08RIK;PELP1;2610318N02RIK;SSX2IP;BHLHE40;SLC4A11;SLC25A13;ARHGAP19;TNIP1;PPAP2C;COQ6;APITD1;CEP55;CEP57;TONSL;CTNNB1;PRRC2C;RANBP17;NUB…
MYCN	297/2260	1.18377e-63	3.14355e-62	-1.37966	195.38	WTAP;SART3;MAP3K9;DHX35;PTBP1;MARK2;PARP2;EZH2;BRD8;ANP32B;EIF4A1;FEN1;SSRP1;LRRC40;NUCKS1;TRIM25;WHSC1L1;PSAT1;HIF1A;SETD1A;LRBA;NRF1;E2F1;E2F7;PTMA;2310036O22RIK;RNF126;RNF121;SLBP;PRR11;WWP2;LMNB1;NEK2;FBXO5;FAM64A;CHAF1B;MITD1;CCNF;ARRDC1;SENP1;ZFP64;ZWILCH;MKRN1;SAE1;SLC25A28;MCOLN1;TOR1AIP2;NUP133;RAD18;IGSF9;DAZAP1;KLHDC10;PELP1;TBC1D10B;BRCA2;SLC25A13;TRIM59;CDK19;NUP188;TPR;CLINT1;FOXM1;…
CREB1	352/3056	2.36661e-63	5.6562e-62	-0.95532	134.726	MAP3K9;MCRS1;PTBP1;JUP;SCYL2;EIF2AK3;5730559C18RIK;GSTCD;MYBL1;XAB2;ISY1;NDC80;PKP1;TSG101;ZC3H7A;1700017B05RIK;EIF4A3;FANCD2;EIF4A1;ESRP1;ERI1;DOM3Z;NUCKS1;AIMP2;ANKHD1;MID1;DUSP4;WHSC1L1;USP49;DIAP3;PASK;TOPBP1;TACC3;CXXC1;FBXO48;TFDP1;MYO1B;NRF1;CDKN1A;SMARCC1;E2F1;IMPA2;PRR15L;PKN3;GRWD1;ACAD9;TBCD;UBAP2;OTUD5;HS3ST1;SLBP;PRR11;ANAPC2;WNK1;2010300C02RIK;KRT14;FAM111A;FAM64A;CTBP1;CCNF;ARRDC1;…
KLF4	309/2442	4.60415e-63	1.00036e-61	-1.29145	181.394	WTAP;PPP1CA;EIF2AK2;AI661453;MYBL1;MYBL2;PARP2;ANP32B;CAR13;EIF4A1;THOC6;NUP107;ERI2;TRIM15;SF3B1;TRIM28;TRIM25;USP43;SSNA1;ZFP687;SPATA24;BAIAP2;RNASEH2B;MEAF6;CXXC1;ERCC6L;CDKN1A;SMARCC1;E2F1;IMPA2;E2F7;HINT1;E2F8;PTMA;CCHCR1;PKN3;TBCD;SLBP;CADM4;PRR11;DDX11;PLD2;ANAPC2;BAZ1B;FBXL8;FUS;LMNB1;NEK2;FBXO5;FAM111A;FAM64A;CCNF;ARRDC1;ZFP64;NCAPH;FOXO3;MCOLN1;NUP133;CSNK1G1;2510012J08RIK;IGSF9;DAZAP1…
ZFX	357/3247	9.67631e-60	1.9272e-58	-1.07416	142.75	SART3;PPP1CA;MYBL1;MYBL2;RCC1;BRI3BP;CAR13;EIF4A3;WHSC1L1;PSAT1;CDKN2B;ZFP687;HIF1A;FBXO34;HP1BP3;HINT1;2310036O22RIK;SNX27;GCA;BAZ1B;CDCA7L;VRK1;DHFR;SUPT16H;SENP1;ZFP64;NOP58;CEP72;SLC25A28;2510012J08RIK;PCBP2;APITD1;HAT1;CEP57;PRRC2C;NAA38;RANBP17;NPLOC4;GMEB2;SLMO2;MND1;JUNB;SMG5;SUV39H2;ALG6;METTL9;NFYC;DRG1;STRN4;TMEM183A;MESDC1;4930427A07RIK;MED4;SUMO3;GMNN;4930572J05RIK;PNN;ANAPC11;HIST4H…
CCND1	271/2133	4.88626e-55	8.34154e-54	-1.56435	191.192	SART3;MCRS1;PTBP1;MARK2;JUN;EIF2AK3;XAB2;NDC80;LASP1;EZH2;BRD8;GLCCI1;EIF4A1;THOC6;DOM3Z;AIMP2;TRIM28;DUSP4;LRP8;PASK;ZFP687;TACC3;LRBA;SMARCC1;HDAC6;PTMA;2310036O22RIK;CCHCR1;NDE1;UBAP2;RNF126;SLBP;PRR11;WNK1;BAZ1B;FUS;NEK2;TK1;FBXO5;ALMS1;FAM64A;CLSPN;CTBP1;ZWILCH;CTDNEP1;SLC16A6;FOXO3;SLC25A28;MCOLN1;NUP133;IGSF9;BLM;KLHDC10;DAZAP1;TBC1D10B;AK2;BRCA1;POC1A;GLYR1;CDK19;ARHGAP19;TPR;EML4;LARP7;C…
POU5F1	403/4228	4.35592e-53	6.94043e-52	-0.942826	111.062	SART3;MYBL1;MYBL2;RCC1;LASP1;PARP2;CAR13;EIF4A1;ESRP1;WHSC1L1;PSAT1;SPATA24;MEAF6;SETD1A;CDKN1A;HINT1;2310036O22RIK;CCHCR1;FRYL;BAZ1B;NEK2;VRK1;AEBP2;MITD1;SENP1;ZFP64;NCAPH;MDC1;TEX9;SLC16A6;MKRN1;PELP1;BHLHE40;SSX2IP;PPIH;SLC4A11;PLEKHA7;ARHGAP18;ARHGAP21;TNIP1;ZW10;PPAP2C;ZMIZ2;LARP7;MDM1;HAT1;CEP57;CTNNB1;RDBP;TNK2;RRM2;RRM1;CAPN5;IQGAP3;IQGAP1;DCTPP1;JUNB;VAV3;SMG5;PRDX4;GPR19;PBK;SASS6;TRAI…
TCFAP2C	295/2666	6.70415e-49	9.07163e-48	-1.20636	130.672	6430573F11RIK;MAP3K8;JUP;EIF2AK3;AI661453;MYBL2;RCC1;ARIH2;NDC80;LASP1;RGS3;TSG101;EZH2;YBX2;ANP32B;1700017B05RIK;EIF4A3;ESRP1;ERI1;SF3B3;SF3B1;SSRP1;TRIM25;MID1;PHF17;PHF19;USP49;DIAP3;PACSIN3;BAIAP2;FMR1;TACC3;RNASEH2B;NRF1;CDKN1B;HDAC6;HINT1;E2F8;PTMA;NDE1;ACAD9;TBCD;DDB2;RNF126;SLBP;PLD2;KRT19;NEK2;SUPT16H;CHAF1A;GOLM1;CCNF;SIGIRR;ZFP64;SLC16A6;NINL;NT5DC2;RAD21;SLC25A28;RBMS1;NUP133;RAD18;IG…
SOX2	337/3316	6.83219e-49	9.07163e-48	-1.06293	115.135	EIF2AK2;MYBL1;MYBL2;LASP1;CAR13;EIF4A1;WHSC1L1;PASK;ATP9A;CDKN1B;HDAC6;FRYL;SNX27;WNK1;SENP1;ZFP64;MDC1;TEX9;SLC16A6;NOP58;MKRN1;EMP2;MRPS10;PELP1;BHLHE40;PPIH;SLC4A11;SLC25A13;PLEKHA7;TNIP1;ZW10;LARP7;MDM1;HAT1;CEP55;CTNNB1;RDBP;TNK2;RRM2;CAPN5;JUNB;VAV3;DOCK7;GPR19;PBK;RFWD3;TRAIP;ZRANB3;EFNB2;PIM1;2810408A11RIK;ASH2L;AP3B1;MESDC1;4930427A07RIK;PDIK1L;SUMO3;MAPK12;MEX3C;PNP;SLC4A2;RAD51L1;HIST2…
TCFCP2L1	232/1987	3.12648e-41	3.3965e-40	-1.24807	113.425	MAP3K9;SCYL3;5730559C18RIK;CKLF;BRI3BP;ACER2;GTSE1;YBX2;NUP107;ERI2;MID1;USP43;DIAP3;CDKN2B;CDKN2C;FMR1;RNASEH2B;HIF1A;CDKN1A;CDKN1B;HDAC6;E2F1;IMPA2;E2F7;PTMA;PRR15L;CCHCR1;DDB2;RNF121;GCA;1190003J15RIK;BIN3;KRT23;CTBP1;SPECC1;CCNF;ARRDC1;ZFP64;HSH2D;ZFP54;NOP58;MKRN1;SLC25A28;MCOLN1;2510012J08RIK;IGSF9;SETDB2;RFX7;TRIM59;TMPO;CDK19;FUBP1;TNIP1;ZW10;EML4;CD80;CEP55;CEP57;MAP3K1;RAD51AP1;MLF1IP;C…
SFPI1	255/2368	5.60166e-40	5.82086e-39	-0.797324	70.1959	DHX35;SCYL3;PPP1CA;EIF2AK3;MYBL2;TAOK3;GARS;LASP1;GLCCI1;MTMR2;DOM3Z;USP37;DHX16;LRRC40;TRIM25;ANKHD1;SF3A3;DUSP4;PHF14;BAIAP2;TOPBP1;TACC3;MEAF6;NR2C2;RNF168;AIM2;CDKN1B;SMARCC1;HP1BP3;HINT1;NDE1;VPS16;ACAD9;OTUD5;8430419L09RIK;DDX11;WWP2;PLD2;UBR7;PRAM1;CDCA7L;VRK1;AEBP2;ALMS1;CHAF1A;GPR160;RAD51;MDC1;ZFP54;CYP4F16;MCOLN1;TOR1AIP2;CSNK1G1;KLHDC10;DAZAP1;BHLHE40;RFX7;BRCA2;AK2;POC1A;CDK19;ARHGAP…
ERG	227/1969	1.61137e-39	1.54047e-38	-0.914082	79.5856	EIF2AK3;MYBL2;GARS;GTSE1;ANP32B;GLCCI1;MTMR2;USP37;NUCKS1;TRIM28;TRIM25;DUSP4;PHF14;BAIAP2;FMR1;TACC3;RNASEH2B;HIF1A;NR2C2;FBXO48;MPRIP;CDKN1A;SMARCC1;IMPA2;E2F7;2310036O22RIK;VPS16;OTUD5;CEP192;8430419L09RIK;DDX11;WWP2;FBXL8;CDCA7L;FUS;ALMS1;DHFR;CHAF1B;CLSPN;BC048355;TTK;LRR1;MCOLN1;2510012J08RIK;AK2;POC1A;EML3;PANK2;RBMX2;MDM1;CEP55;RPA2;NUP155;CTNNB1;MAP2K3;NUBP1;FBXL14;CDC7;EXOSC2;RRM2;RRM1;…
TRIM28	298/3068	3.02169e-39	2.77763e-38	-1.00439	86.8567	WTAP;MAP3K9;ARC;PTBP1;SCYL3;JUP;JUN;5730559C18RIK;GSTCD;MYBL2;RCC1;ARIH2;CKLF;ACER2;GARS;LASP1;PKP4;TSG101;EZH2;ANP32B;ZC3H7A;1700017B05RIK;EIF4A1;ERI1;MTMR2;LRRC40;DUSP4;USP43;DIAP3;CDKN2A;CDKN2B;CDKN2C;ZFP687;BAIAP2;RNASEH2A;HIF1A;TFDP1;CDKN1B;HP1BP3;HINT1;E2F8;PTMA;CCHCR1;SPINT2;VPS16;UBAP2;EFCAB4A;ALOXE3;FBXL8;NEK2;CHAF1A;GOLM1;SPECC1;THAP4;MKRN1;FOXO3;SLC25A28;MCOLN1;RBMS1;RAD18;IL22RA1;BLM;…
GFI1B	215/1871	3.66673e-37	3.12982e-36	-0.882296	72.1295	JUN;GARS;USP18;ZC3H7A;ARHGEF11;TRIM17;DHX16;SSRP1;LRRC40;ANKHD1;DUSP4;USP49;LRP8;BAIAP2;TOPBP1;MEAF6;SETD1A;TFDP1;2810417H13RIK;CDKN1A;FBXO34;HINT1;PTMA;CCHCR1;NDE1;PKN3;VPS16;DDX11;PLD2;PRAM1;FUS;LMNB1;NEK2;MDC1;ZFP54;BC048355;SAE1;MCOLN1;TOR1AIP2;MRPS10;KLHDC10;BHLHE40;RFX7;BRCA2;CDK19;EML4;PANK2;NUP160;PPP4R1;CEP55;CTNNB1;LSM2;BCL2L11;CTDSPL2;3010026O09RIK;NUBP1;FBXL14;CDC7;NUP205;RRM2;RRM1;XP…
TAL1	226/2066	3.71843e-36	2.86679e-35	-0.796457	63.348	PTBP1;JUN;RCC1;CKLF;TAOK3;GARS;ATP11B;ZC3H7A;EIF4A1;MTMR2;DOM3Z;DHX16;NUCKS1;TRIM28;ANKHD1;SF3A3;DUSP4;LRP8;BAIAP2;TOPBP1;TACC3;HIF1A;MEAF6;CDKN1A;SMARCC1;HINT1;PTMA;NDE1;TMC8;BAX;DDX11;UBR7;FBXL8;BIN3;FUS;NEK2;CRAMP1L;CHAF1A;MDC1;ZFP54;TEX9;NOP58;BC048355;MCOLN1;TOR1AIP2;C330019G07RIK;MRPS10;DAZAP1;BRCA2;BRCA1;NUP188;FUBP1;PCBP2;TPR;CLINT1;EML4;PANK2;MDM1;CTNNB1;LSM2;TUBB4B;MAP2K3;NUBP1;PWWP2A;F…
ZFP42	183/1476	2.63138e-35	1.90576e-34	-1.33958	104.009	MED24;SART3;DHX35;PTBP1;SCYL3;MARK2;NCAPD2;5730559C18RIK;ARF6;ARIH2;SRSF7;SRSF1;BRD8;ANP32B;HIST1H1A;EIF4A1;SCML2;HIST2H3C1;SF3B3;MTMR2;MPDU1;AIMP2;NUCKS1;PMS2;DNAJC5;SPATA24;BAIAP2;ATP9A;HIST1H4K;HIST1H4A;HIST1H4F;RNF168;HIST1H4H;HIST1H3D;HIST1H3E;HIST1H3G;HIST1H3H;PTMA;2310036O22RIK;CCHCR1;NDE1;GRWD1;VPS16;KIF11;RNF121;BAX;PRR11;AURKA;G2E3;AP4M1;OPTN;UBR7;PRDM1;NEK2;TK1;SPNB3;IL1RL2;HNRNPA1;TCF…
SOX17	206/1946	4.32783e-31	2.72197e-30	-0.996748	67.8548	BTC;SART3;DHX38;6430573F11RIK;PTBP1;MIIP;MYBL2;GARS;EIF4A1;SF3B3;SF3B1;FEN1;NUCKS1;TRIM25;USP43;CDKN2A;BAIAP2;TIMELESS;NR2C2;CXXC1;MYO1B;2810417H13RIK;NRF1;CDKN1B;HDAC6;PTMA;FRYL;ALOXE3;WNK1;BAZ1B;LMNB1;KRT23;VRK1;SPECC1;NCAPH;NOP58;TTK;FOXO3;MRPS10;KLHDC10;PELP1;TBC1D10B;EML3;LARP7;MDM1;CKS1B;NUP160;RPA2;CTNNB1;LSM3;CCNA2;BCL2L11;MYEF2;MAP2K3;QARS;ARHGAP11A;MASTL;CDC6;EXOSC2;HN1;RRM2;RRM1;POLA2;…
SETDB1	210/2019	9.30888e-31	5.70467e-30	-1.04759	70.5409	DHX35;MCRS1;SCYL3;MARK2;EIF2AK3;MYBL2;CKLF;BRD8;ANP32B;ZC3H7A;ARHGEF16;1700017B05RIK;EIF4A3;FANCD2;THOC6;NUP107;ERI1;TRIM15;MTMR2;TRIM28;PHF17;RNASEH2B;ATP9A;CXXC1;RNF168;CDKN1A;VPS16;GCA;WNK1;UBR7;FBXL8;FUS;STK17B;TK1;AEBP2;ALMS1;CHAF1A;GOLM1;RAD50;SIGIRR;SEMA4D;MDC1;GJB2;SLC16A6;CSNK1G1;IGSF9;IL22RA1;DAZAP1;KLHDC10;PELP1;BHLHE40;SSX2IP;SETDB2;BRCA2;FUBP1;EPCAM;ARHGAP27;RPA3;ZFP185;VTCN1;CTNNB1;…
CNOT3	177/1542	2.03913e-30	1.21838e-29	-1.15562	76.9383	ARC;SCYL3;GSTCD;RCC1;MYBL2;GARS;ZC3H7A;1700017B05RIK;ERI1;LRRC40;PSAT1;RNASEH2B;TFDP1;CDKN1B;E2F7;PTMA;FRYL;ALOXE3;STK17B;CHAF1A;THAP4;FOXO3;MCOLN1;TOR1AIP2;BRCA2;BRCA1;TRIM59;TMPO;NUP188;FUBP1;DGCR8;TPR;KRT6A;CEP57;HIST2H2AA1;RDBP;CCNE2;CCNE1;CDC7;EXOSC8;GMEB2;FEM1B;F630043A04RIK;SLMO2;DOCK7;TRADD;DNA2;PLK4;IPO9;DCK;NFYC;CDH1;TOR1A;DCLRE1A;NUP43;MRE11A;NUP62;WBP7;PDIK1L;SUMO3;4930572J05RIK;RNF26…
CHD1	124/843	5.49831e-30	3.1288e-29	-1.52677	100.209	VKORC1L1;SART3;INCENP;PTBP1;PPP1CA;MED18;EIF2AK3;MYBL1;MYBL2;XAB2;CKLF;ASXL2;BRD8;CKAP2L;ERI1;HIST2H3C1;SRRT;TRIM28;HNRNPUL1;OGG1;KNTC1;TIMELESS;HIST1H4A;HIST1H4I;ERCC6L;HIST1H3B;HIST1H3E;HIST1H3H;HIST1H3I;IER2;IMPA2;HINT1;NDE1;PRPF3;XPNPEP1;ZBED3;OPTN;ZBTB45;HNRNPA1;HIST3H2BA;FANCA;FANCB;MBD3;RAD51;ZFP64;TOE1;ZWILCH;NOP58;KIF20A;RAD21;GABPB2;TOR1AIP2;KLHDC10;CENPC1;CDK19;COQ7;UBE2S;UBE2T;TRA2B;R…
HOXB4	192/1823	1.0976e-28	6.10061e-28	-1.19592	74.9409	DHX38;MAP3K8;MCRS1;PTBP1;MIIP;SCYL2;EIF2AK3;ARIH2;CKLF;ATP11B;NDC80;ERI1;DHX16;FEN1;NUCKS1;TRIM25;CDKN2C;SPATA24;RNASEH2A;ERCC6L;NRF1;RNF121;ALOXE3;PRR11;WNK1;NEK2;FBXO5;CLSPN;RAD51;LIN54;ZFP54;DLGAP5;RAD21;CSNK1G1;RAD18;BLM;MRPS10;TBC1D10B;TRIM56;POC1A;CDK19;ARHGAP18;FUBP1;COQ7;MDM1;CEP57;POU2F1;LSM2;PLAUR;RANBP17;QARS;CCNE2;ARHGAP11A;CDC6;GMEB2;POLA2;SLMO2;DCTPP1;TMEM209;CCNG2;POLE2;WHSC2;PLK4;…
EOMES	185/1741	4.73432e-28	2.51445e-27	-1.06482	65.2175	WTAP;DHX35;EIF2AK3;AI661453;GSTCD;RCC1;NDC80;RGS3;LASP1;TSG101;ANP32B;SF3B3;MTMR2;SF3B1;MID1;PHF17;LRP8;USP49;DIAP3;FMR1;RNASEH2B;TFDP1;MYO1B;NRF1;CDKN1B;SMARCC1;HP1BP3;SPINT2;ACAD9;OTUD5;ALOXE3;KRT19;NEK2;AEBP2;SUPT16H;GOLM1;SPECC1;NOP58;BC048355;MKRN1;FOXO3;RAD21;SLC25A28;RBMS1;RAD18;IGSF9;POC1A;5830418K08RIK;TMPO;ARHGAP18;EPCAM;TNIP1;ZMIZ2;MAP3K1;NUP155;LSM2;PLAUR;MAP2K3;BMP8B;FBXL14;CDC6;EXOS…
JARID1A	211/2171	2.61506e-27	1.30208e-26	-0.505367	30.1215	SART3;DHX38;MCRS1;XAB2;ISY1;GARS;NDC80;PARP2;TSG101;GTSE1;BRD8;EIF4A3;FANCD2;NUP107;THOC3;SF3B3;MTMR2;DOM3Z;DHX16;FEN1;LRRC40;SF3A3;SSNA1;PASK;PACSIN3;TOPBP1;RNF168;HP1BP3;2310036O22RIK;GRWD1;ACAD9;OTUD5;ANAPC2;MITD1;SENP1;ZFP64;THAP4;CTDNEP1;MCOLN1;NUP133;2510012J08RIK;MRPS10;PELP1;BRCA2;5830418K08RIK;GLYR1;NUP188;TPR;COQ6;NUP160;TONSL;NUP155;ZFP185;AIF1L;LSM3;LSM2;3010026O09RIK;RDBP;NAA38;NPLOC…
TBX5	214/2295	1.49458e-25	6.73969e-25	-0.857479	47.7244	SCYL3;MIIP;PPP1CA;EIF2AK2;EIF2AK3;ARIH2;ACER2;TAOK3;GAS2;SFMBT1;LASP1;PARP2;EZH2;GLCCI1;TRIM17;TRIM25;LRP8;SSNA1;SPATA24;BAIAP2;TACC3;LRBA;CXXC1;TFDP1;MPRIP;CDKN1B;SMARCC1;SPINT2;GRWD1;UBAP2;EFCAB4A;CADM4;FBXL8;QRSL1;VRK1;CHAF1A;MITD1;SPECC1;CCNF;RAD51;MDC1;BC048355;LRR1;FOXO3;MCOLN1;TOR1AIP2;BLM;2610318N02RIK;SSX2IP;AK2;TRIM56;TET3;5830418K08RIK;TMPO;GLYR1;ARHGAP19;DGCR8;CLINT1;LARP7;MDM1;CKS1B;…
TCF3	209/2217	1.71553e-25	7.59282e-25	-0.701245	38.9453	DHX38;6430573F11RIK;MAP3K8;JUN;5730559C18RIK;MYBL2;EZH2;ESRP1;THOC6;SF3B1;NUCKS1;TRIM28;TRIM25;MID1;PHF17;DUSP4;WHSC1L1;DIAP3;BAIAP2;TFDP1;NRF1;E2F1;PTMA;PRR15L;CCHCR1;2610528J11RIK;UBAP2;OTUD5;FRYL;TMC8;PRR11;UBR7;NEK2;FBXO5;ALMS1;ZFP64;SLC16A6;MKRN1;LRR1;SLC25A28;KLHDC10;SPC24;PELP1;BHLHE40;BRCA1;SLC4A11;PLEKHA7;CDK19;ARHGAP21;TNIP1;EML4;LARP7;MDM1;POU2F1;RAD51AP1;BCL2L11;AHCY;TNK2;FEM1B;NUP210…
GATA4	184/2035	1.3139e-20	5.3224e-20	-0.959332	42.5749	SCYL3;GSTCD;MYBL2;BRI3BP;EZH2;ERI1;SF3B1;PHF17;PASK;CDKN2C;TOPBP1;4632419I22RIK;MEAF6;RNF168;CDKN1B;FBXO34;HINT1;E2F7;TBCD;SLBP;WWP2;BAZ1B;FBXL8;AEBP2;MITD1;CTBP1;SPECC1;RAD51;ZFP111;MDC1;RBMS1;RAD18;BRCA2;TRIM56;PLEKHA7;5830418K08RIK;CDK19;TPR;PANK2;TYMS;MAP3K1;MLF1IP;PSPC1;SLC9A5;AIF1L;CCNA2;PRRC2C;TUBB4B;NPLOC4;MKI67;TNK2;CCNE2;LSM14A;CCNE1;PWWP2A;NUP205;AW146020;RQCD1;CAPZA1;CNOT1;HIRIP3;ARID…
STAT4	176/1933	5.25242e-20	2.05791e-19	-1.53841	66.1936	MAP3K8;JUN;ARIH2;ATP11B;RGS3;PKP3;EZH2;RNF186;TRIM17;DOM3Z;SSRP1;AIMP2;SF3A3;WHSC1L1;LRP8;PASK;RNASEH2A;HIF1A;SETD1A;2310008H04RIK;HP1BP3;ALOXE3;PRAM1;VRK1;AEBP2;HIST3H2BA;CCNF;SIGIRR;NCAPH;MDC1;CTDNEP1;TOR1AIP2;BHLHE40;BRCA1;CDK19;EML4;PANK2;TONSL;CDHR5;BCL2L11;CWH43;QARS;CDC7;CDC6;NUP210;DOT1L;BARD1;XPO1;CAPZA1;TMEM209;JUNB;1600002H07RIK;WHSC2;DEK;FRMD8;CLCF1;HIST3H2A;METTL9;NUP93;TOR1A;SMC3;SM…
NR0B1	159/1689	2.33952e-19	9.01847e-19	-0.70041	29.1019	DHX35;5730559C18RIK;MYBL2;ATP11B;LASP1;ESRP1;NUCKS1;TRIM25;DUSP4;USP43;BAIAP2;RNASEH2A;RNASEH2B;CDKN1A;CDKN1B;IMPA2;CCHCR1;FRYL;TMC8;NEK2;TK1;GOLM1;SEMA4D;SLC16A6;NINL;MKRN1;TTK;SPC24;SPC25;BHLHE40;TBC1D10B;DGCR8;TNIP1;NADSYN1;FOXM1;RPA2;POU2F1;TONSL;THRAP3;MAP2K3;HSPA14;CCNE1;CDC7;FEM1B;SHMT1;SLC44A4;JUNB;WHSC2;DEDD;CLCF1;HIST3H2A;RTEL1;BC030867;CDH1;TAB1;SMC3;MIS18BP1;ATP1B1;PDLIM1;PIM1;NUP50;T…
FLI1	177/2030	2.31003e-18	8.76346e-18	-0.240615	9.45039	PTBP1;SCYL3;PPP1CA;JUN;EIF2AK3;TAOK3;GTSE1;USP18;GM5643;ZC3H7A;USP37;SSRP1;ANKHD1;SF3A3;LRP8;PSAT1;CXXC1;2310008H04RIK;2810417H13RIK;AIM2;CDKN1A;E2F8;PTMA;2310036O22RIK;VPS16;UBAP2;OTUD5;RNF121;TMC8;CEP192;BAX;DDX11;BAZ1B;BIN3;CRAMP1L;QRSL1;FAM111A;CHAF1A;RAD51;ZFP54;CTDNEP1;NOP58;MRPS10;KLHDC10;DAZAP1;TBC1D10B;RFX7;EML4;RPA2;TONSL;NUP155;MLF1IP;ITPRIPL1;LSM2;PLAUR;QARS;MRI1;RRM1;QTRT1;RQCD1;CAPN…
NKX2	144/1504	3.62625e-18	1.35418e-17	-1.24588	48.3908	DHX35;MYBL1;ASXL1;SRSF4;ELF3;SF3B1;SRRT;USP37;ACSL3;TRIM28;SF3A3;HNRNPUL1;USP49;OGG1;DNAJC5;PMS1;HELLS;MPRIP;KIF24;VPS16;PMM2;TXNRD1;HAUS8;UBAP2;FRYL;RNF121;SLBP;BAZ1B;FBXL8;EPHB3;EIF1AD;PAXIP1;MBD3;THAP4;ZFP111;TOE1;PDS5A;SAE1;DTL;BLM;PLEKHA7;5830418K08RIK;ARHGAP18;PPIP5K1;RANBP3;TPR;TUBA1C;COQ7;UBE2C;EML4;EML3;PPP4R1;TRA2B;GPRC5A;TYMS;POU2F1;PHF20L1;TONSL;PSPC1;SLC9A5;CDCA2;CCNA2;4632434I11RIK;…
MYB	104/923	1.31772e-17	4.77175e-17	-0.774488	29.1062	2310003H01RIK;PIK3C3;PIK3CB;PTBP1;MYH9;NCAPD3;ALCAM;PKP4;MCPH1;IL13RA1;SSNA1;2310008H04RIK;1600029D21RIK;HP1BP3;CASP3;ACAD9;1700023E05RIK;FHOD1;SLC35C1;DDX11;ATXN10;PRAM1;CDCA7L;STK17B;TK1;QRSL1;VRK1;KLF5;KLF6;GPR160;NSMCE2;SPECC1;RBBP7;SAMD9L;MLLT4;MKRN1;NT5DC2;FOXO3;RBMS1;BLM;DAZAP1;POC1A;DUT;CDK19;FAM134A;TMEM180;2610020H08RIK;MTL5;ZBTB8A;CDCA4;BCL2L11;PLAUR;ARHGEF10L;MKI67;MAP2K3;QARS;ZDHHC6;…
SIN3A	119/1186	1.65704e-16	5.50045e-16	-0.418493	14.7044	ARC;LPCAT4;NCAPD2;ARF5;ACER2;PKP4;ELF3;EIF4A3;TRIM14;ANKHD1;OGG1;CTNNBL1;PMS2;STMN1;LRBA;ARPC2;1600029D21RIK;IER2;KIF22;CYP2S1;E2F8;KIF2C;PMM2;XPNPEP1;BAX;GDF15;G2E3;8430419L09RIK;WWP2;ANAPC2;VANGL1;BAZ1B;NEK2;FCHO1;ALMS1;ZFP949;CHAF1B;ZBTB22;ARRDC1;RAD51;MDC1;MKRN1;TTK;PMAIP1;PLXNB2;C330019G07RIK;IGSF9;CCDC18;POC1A;CCDC34;NUP188;COQ6;MDM1;SLC9A5;ANKLE1;INTS7;CDCA5;3010026O09RIK;RDBP;TGIF1;NAGK;A…
NANOG	252/3481	2.52686e-16	8.27287e-16	-1.91363	66.4572	LRRC6;EIF2AK3;MYBL2;LASP1;CAR13;SPATA24;TIMELESS;ATP9A;MEAF6;FBXO34;ACAD9;FRYL;FUS;AEBP2;ALMS1;ZFP64;ZFP54;CYP4F16;NOP58;MKRN1;SLC25A28;2210409E12RIK;EMP2;PPIH;SLC25A13;PLEKHA7;ARHGAP19;ZW10;APITD1;CEP55;TUBGCP2;RANBP17;NAA40;TNK2;RRM1;QTRT1;IQGAP1;DCTPP1;MND1;TMEM209;PPM1D;TSPAN33;MIS18BP1;PAN2;PIM1;AP3B1;SUMO3;MAPK13;OBFC1;GYK;PNP;TMPRSS13;DSCC1;RAD51L1;NFATC2IP;GSS;KHDRBS1;CTNND1;CENPV;MCPH1;C…
WT1	148/1663	3.95333e-16	1.24322e-15	-0.386938	13.2801	RORC;DHX35;PTBP1;SCYL3;JUP;JUN;LASP1;ANP32B;ZC3H7A;ESRP1;SF3B3;DUSP4;LRP8;BAIAP2;TIMELESS;LRBA;MYO1B;NRF1;CDKN1A;SMARCC1;IMPA2;CCHCR1;DDX11;WNK1;UBR7;FUS;ALMS1;GOLM1;FOXO3;CSNK1G1;IGSF9;SSX2IP;BHLHE40;CDK19;ARHGAP18;ARHGAP27;EML4;MAP3K1;POU2F1;BCL2L11;CTDSPL2;FBXL14;GNB2;FEM1B;MMS19;XPO1;CNOT6;RCBTB1;ARID1A;DEDD;DEK;CLCF1;TRPM4;METTL9;PPM1D;EFNA1;PAN2;PIM1;SRSF10;SERINC2;SMAD3;LCORL;ILF3;ITPR3;MA…
THAP11	96/863	5.13072e-16	1.59252e-15	-1.0312	35.1364	MED24;ESPL1;SCRIB;ASXL1;SRSF1;GTSE1;HIST1H1B;EIF4A3;THOC6;WHSC1L1;PASK;TACC3;RNASEH2A;STMN1;SETD1A;HIST1H4H;PHACTR4;HP1BP3;2310036O22RIK;MAX;KIF2C;HAUS6;HAUS1;PRPF8;RNF121;EXO1;SNX27;CDKN2AIPNL;8430419L09RIK;GTPBP2;WNK1;VRK1;EIF1AD;CNIH4;CLSPN;FANCG;SPECC1;RHBDD3;RAD51;ZFP111;TSTA3;NUP133;RAD18;CCDC18;DAZAP1;BRCA1;DNMT1;CDK19;ARHGAP19;ZCWPW1;PCBP2;TPR;ZW10;GEMIN6;BC055324;TMEM48;THRAP3;ZBTB8A;RAN…
SMAD1	77/610	1.11896e-15	3.3852e-15	-0.952285	31.7295	XRCC1;HIST1H2BP;RCC1;MYBL2;TCF3;ATP11B;H3F3B;HIST1H1B;HIST1H1A;GMEB2;EIF4A1;HIST1H2AB;MPDU1;HIST1H2BB;NUCKS1;TRIM28;HIST1H2AK;SSR2;HIST1H2AN;MTHFD1L;KDM1A;NUDT4;MND1;ATP9A;STMN1;HIST1H4K;HIST1H4B;HIST1H4F;HIST1H4D;HIST1H4I;HIST1H4H;DOCK7;DNA2;CDKN1B;HIST1H3C;HIST1H3G;HIST1H3I;CLDN4;CLDN3;ALG6;PTMA;GPR19;FHOD1;UPP1;CCDC129;KDM3B;TSPAN14;CDC25C;BAX;ATP1B1;TPD52;MRPL51;FBXL8;CHKA;CHEK2;FBXO5;HNRNPAB…
SMARCA4	112/1118	1.49739e-15	4.47344e-15	-0.665129	21.9763	9530008L14RIK;6430573F11RIK;MAP3K8;PIK3CB;MARK2;EIF2AK3;LASP1;RGS3;ANP32B;PAPD7;CLIC1;EIF4A3;ERI2;SF3B1;MID1;PHF19;PRC1;RNASEH2A;HIF1A;OAS1B;OAS1F;ARPC2;HIST1H4H;NRF1;1600029D21RIK;HDAC6;CLDN4;CLDN3;PTMA;PMM2;TXNRD1;OTUD5;SLC35C1;RAN;KRT19;NEK2;KLF5;RBBP7;LIN54;SLC16A6;MKRN1;RAD21;SLC25A28;IGSF9;POC1A;PLEKHA7;HMBS;ZMIZ2;ZFP367;D17WSU92E;CTNNB1;PLAUR;TGIF1;AHCY;TCF3;BMP8B;CDC6;EXOSC2;MXD1;ARVCF;BU…
STAT3	73/572	3.77835e-15	1.10576e-14	-0.99594	32.0052	HIST1H2BN;CCNA2;NCAPD2;AAAS;EIF2AK2;ARF6;MYBL2;ASXL1;EZH2;CCNE1;ZDHHC6;HIST1H1A;SF3B3;SRRT;DOM3Z;HIST1H2BB;TRIM25;MMS19;XPO1;STK38;SPATA24;STAP2;JUNB;1600002H07RIK;HMGB2;HIST1H4K;CXXC1;ASF1B;HELLS;PHACTR4;SMG5;CYB561;CDKN1A;DDX59;IER2;CLDN4;FIGNL1;SKAP2;PTMA;2610528J11RIK;HAUS1;UPP1;TPD52;HOOK2;U2AF1;MRPL51;AARS;PIM1;ALDH16A1;RFC5;NOC4L;ZBTB45;LAMA5;MITD1;MESDC1;MBD3;SIGIRR;NXT1;MDC1;BCL3;CISH;SL…
ZFP281	165/2000	3.79381e-15	1.10576e-14	-0.345915	11.1162	RORC;ARC;PTBP1;JUP;JUN;5730559C18RIK;MYBL2;GARS;GAS2;LASP1;PKP3;EZH2;YBX2;EIF4A1;ESRP1;SSRP1;TRIM28;TRIM25;DUSP4;USP49;CDKN2A;PACSIN3;ZFP687;CDKN1A;PTMA;PKN3;2610528J11RIK;UBAP2;CADM4;BAZ1B;FUS;AEBP2;ALMS1;SENP1;NCAPH;SLC16A6;MKRN1;TTK;IGSF9;BHLHE40;RFX7;TRIM56;CDK19;PCBP2;ARHGAP27;LARP7;CKS1B;MAP3K1;POU2F1;THRAP3;CTNNB1;BCL2L11;PLAUR;CCNE2;CCNE1;FBXL14;CAPN5;XPO1;JUNB;APOBR;TRAF4;TRADD;POLD3;DED…
SPI1	142/1653	2.19516e-14	6.1005e-14	-0.0102889	0.313068	SART3;EIF2AK2;MYBL1;ARIH2;ISY1;GARS;FNIP2;RNF186;USP18;1700017B05RIK;ARHGEF11;EIF4A1;ERI2;MTMR2;DUSP4;PHF14;USP49;2310036O22RIK;SPINT2;TMC8;PRR11;PRAM1;CNKSR1;CTBP1;SPECC1;SEMA4D;SLC16A6;CD14;MKRN1;FOXO3;MRPS10;KLHDC10;SPC25;RFX7;TMPO;EPCAM;PCBP2;TNIP1;ARHGAP27;COQ7;MDM1;GPR115;BCL2L11;RDBP;NAA38;GNB2;CAPN5;XPO1;TRABD;POLE3;DOCK7;CDK5RAP2;NSL1;PAN2;CEP152;SERINC2;SOWAHB;ACTR3;CEP110;PDIK1L;MED4;C…
PRDM14	159/1943	2.40213e-14	6.59895e-14	0.18378	-5.5776	DHX35;JUP;JUN;GM14005;FNIP2;PKP4;GTSE1;CAR13;ARHGEF11;EIF4A3;TRIM25;WHSC1L1;DIAP3;RNASEH2A;CDKN1B;SMAGP;KRT14;CDCA7L;STK17B;QRSL1;AEBP2;FAM111A;ARRDC1;SEMA4D;ZFP64;NCAPH;TYMS-PS;NINL;MKRN1;FOXO3;BHLHE40;CDK19;ARHGAP21;CLINT1;APOL7A;FRK;CEP55;NUP155;SLC9A5;PLAUR;TNK2;GPR85;CCNE1;FEM1B;CAPZA1;ARID1A;ARID1B;HMGB3;WHSC1;FRMD8;CDK5RAP2;LBR;CDH1;TSPAN33;TSPAN14;ATP1B1;DEPDC1B;PIM1;BMS1;CISH;MAPK13;OBFC…
SRF	138/1634	1.71739e-13	4.4135e-13	-0.614872	17.4925	DHX38;MAP3K8;EIF2AK2;GAS2;PARP2;EZH2;TRIM28;PHF17;PACSIN3;TACC3;MEAF6;NR2C2;RNF168;TFDP1;CDKN1B;E2F7;FRYL;SNX27;ANAPC2;FBXL8;ALMS1;DHFR;MITD1;RAD51;ZFP111;MDC1;DLGAP5;TOR1AIP2;RAD18;AK2;POC1A;PLEKHA7;GLYR1;ARHGAP18;TPR;NADSYN1;COQ7;LARP7;CKS1B;AIF1L;LSM2;CTDSPL2;PRRC2C;CDC6;AW146020;F630043A04RIK;SHMT1;CCNB2;ZFP7;MMS19;IQGAP3;TMEM209;CCNG2;NSL1;ZRANB3;PRIM1;PRIM2;PIM1;MRE11A;TMEM183A;ACTR3;LCORL;…
MEIS1	127/1452	1.81154e-13	4.60593e-13	-0.0352553	1.00147	NCAPD3;TMEM134;EIF2AK3;AI661453;ARF6;TMEM128;TAOK3;SRSF4;YBX2;CEACAM1;ZC3H7A;CLIC1;NUP107;TRIM15;USP37;ANKHD1;USP49;BAIAP2;CXXC1;PEG10;ARPC2;MUC1;EHMT2;AIM2;CDKN1B;FBXO34;IER5;HP1BP3;MAX;TMC8;BAX;RPP25;F11R;BAZ1B;LPAR5;PRAM1;BIN3;CELSR1;ZBTB45;CNIH4;STYK1;ZFP54;TEX9;ATMIN;PKMYT1;LRR1;TOR1AIP2;2510012J08RIK;CCDC18;EIF4B;TRIM56;NUP188;TPR;ZW10;ADIPOR1;FAM134A;CD80;NUP160;MTL5;MLF1IP;INTS7;WDR91;BCL…
GATA3	85/834	1.93165e-12	4.75944e-12	-0.598142	15.5941	6430573F11RIK;PIK3C3;PIK3CB;PTBP1;EIF2AK3;MYBL2;RECQL4;NDC80;TAF1D;HNRNPUL1;PACSIN3;2310008H04RIK;CDKN1B;CLDN7;CLDN3;HINT1;KIF2C;SPINT2;TBCD;GDF15;ALOXE3;AURKA;OPTN;KRT19;AEBP2;HIST3H2BA;CTBP1;LIN54;ZFP64;ETV3;BC048355;SLC25A28;AKAP8;CORO2A;EIF3D;KATNA1;PLEKHA7;EPCAM;RANBP1;TNIP1;RBMX2;PPP4R1;D17WSU92E;GPR111;CDCA4;PLAUR;RDBP;AHCY;TCF3;RRM2;RRM1;FEM1B;SOAT2;JUNB;WEE1;DDX39;ANLN;HNRNPK;FRMD8;LBR;L…
CEBPB	131/1588	3.3921e-12	8.10712e-12	0.221418	-5.65463	EIF2AK2;EIF2AK3;RCC1;FNIP2;YBX2;1700017B05RIK;ARHGEF11;EIF4A1;TRIM14;FEN1;PHF14;BAIAP2;FBXO48;AIM2;FBXO34;2310036O22RIK;PRR15L;TMC8;ALOXE3;PRR11;PLD2;CCNF;LIN54;ZFP111;CTDNEP1;FOXO3;CSNK1G1;IGSF9;MRPS10;KLHDC10;TMPO;PCBP2;TNIP1;ARHGAP27;MDM1;MLF1IP;ITPRIPL1;GPR115;TPSB2;CDC6;QTRT1;CCNB1;HMGB1;FRMD8;CLCF1;ZRANB3;RAVER1;CIZ1;SMAD3;TMOD3;ACTR3;GTF2B;CTNNBIP1;CISH;MIS12;SNRPC;RNF26;ANAPC11;HIST2H3B;T…
SALL4	94/1006	1.1323e-11	2.62738e-11	-0.589104	14.352	VKORC1L1;BTC;DHX35;PIK3CB;MYBL2;ASXL2;ASXL1;ELF3;EZH2;ACSL5;AIMP2;TRIM28;TRIM25;CDKN2A;TIMELESS;STMN1;NRF1;CDKN1B;1600029D21RIK;FBXO34;E2F1;PMM2;SLBP;ALOXE3;VANGL1;WNK1;PARP12;STK17B;HNRNPAB;KLF5;KLF6;AEBP2;ETS2;NEURL1B;RBBP7;ZDHHC15;NCAPH;TTK;TOR1AIP2;KLHDC10;CDK19;HMBS;TMEM71;EML4;MAP3K1;POU2F1;SRBD1;CCNA2;PLAUR;NAA38;QARS;FBXL14;MASTL;CDC7;CDC6;FEM1B;BUB1;TSPAN8;RCBTB1;CPA2;NUDT4;WEE1;ANLN;SUV…
CTCF	127/1568	2.29241e-11	5.16875e-11	0.0336702	-0.797505	BTC;RCC1;CAR13;ANP32B;ZC3H7A;TRIM14;ERI1;DHX16;SF3A3;LRP8;MEAF6;MYO1B;FBXO34;DDB2;PLD2;ALMS1;DHFR;ZFP64;HSH2D;ZFP54;SLC16A6;TTK;TOR1AIP2;IGSF9;SPC24;POC1A;PCBP2;APITD1;NUP160;2610002M06RIK;POU2F1;SLC9A5;SLC9A4;CCNA2;PTPRR;PRRC2C;EXOSC8;CAPN8;B3GALNT1;DCTPP1;MND1;PLK2;POLD1;BC030867;DEF6;TAB1;SMC3;MIS18BP1;DEPDC1B;CIZ1;CEP164;WBP7;4930427A07RIK;MED4;BMS1;SUMO3;4930572J05RIK;LSR;MTAP7;CENPB;2310003…
PDX1	70/669	6.25288e-11	1.34634e-10	-0.489773	11.1318	DHX38;MCRS1;PTBP1;MIIP;HNF4G;EIF2AK3;AHCY;NUF2;NDC80;PCNA;HSPA14;FEM1B;NUP210;RQCD1;NUCKS1;HNRNPUL1;CHTF18;ZFP687;STK25;TACC3;HNRNPL;D330028D13RIK;ASF1B;2810417H13RIK;SKAP2;CDC45;NUSAP1;PRPF3;SLBP;EFNA1;TRMT2A;HOOK1;HOOK2;DEPDC1B;AP4M1;MAD2L2;FUS;MRE11A;FAM122B;CHEK2;POLQ;HNRNPA1;ETS2;HIST3H2BA;AP3B1;MIS12;CISH;KIF20A;CBX5;MUTYH;GABPB2;CSNK1G1;FAM72A;AKAP8;SNRPC;EIF3D;CENPC1;MCM8;MCM7;KHDRBS1;ARH…
ESRRB	116/1433	1.83569e-10	3.88256e-10	0.137551	-2.98063	WTAP;DHX35;MYH9;NCAPD2;RCC1;RAC3;BRI3BP;GARS;ATP11B;GAS2;PKP4;TTF2;TMCO4;TRIM25;USP43;DNAJC5;STMN1;MEAF6;TUBE1;FBXO34;KIF23;CASP3;HAUS8;UPP1;SLBP;BAX;GDF15;GCA;CDKN2AIPNL;RPP25;PARP12;QRSL1;SPNB3;FCHO1;FAM64A;CNIH4;DSN1;SPECC1;MBD3;RAD51;THAP4;BCL3;MYO5C;RAB35;NUP133;C2CD2;AK2;POC1A;SLC25A13;RANBP1;COQ7;KRTCAP3;ZFP367;MAP3K1;CDAN1;ZBTB8A;CDCA5;CDHR5;CWH43;AAAS;ST14;MGAT4B;ZDHHC5;RRM1;F630043A04RI…
TRP63	28/141	2.55776e-10	5.31569e-10	-0.642939	13.7301	PTTG1;AURKB;EFNB2;PLAUR;JUN;EMP2;TK1;ALCAM;GABRP;KLF6;IL1RN;TCF19;KIF23;ELF3;CLCF1;ZC3H7A;TPX2;LPIN2;MXD1;RRM2;CKS1B;FOXM1;NCAPH;CENPA;TNFRSF18;EPPK1;PSRC1;ZFP7
YY1	54/464	3.21799e-10	6.57351e-10	-0.316722	6.69638	PIK3C3;PTBP1;SCYL3;TMEM134;PCIF1;NUF2;FNBP4;EXOSC2;RRM1;CAPN8;NUDT4;CXXC1;APOBR;GABRP;WHSC2;IER2;HINT1;DEDD;PTMA;2310036O22RIK;VPS16;PRPF3;CHFR;CHD2;TAB1;BAK1;OASL1;AARS;OPTN;A430005L14RIK;SNRNP35;NSMCE4A;D2ERTD750E;DSN1;ZFP64;MRPL19;MKRN1;KLHDC10;RAD51L1;CASC5;BC052040;ZCWPW1;NFATC2IP;RABL3;MCM5;TMEM180;UBE2T;RPA2;CENPB;CENPL;LRRC16A;SP1;SP3;2610001J05RIK
NACC1	72/769	2.82055e-09	5.6176e-09	-0.192971	3.66593	JUP;5730559C18RIK;MYBL2;ARIH2;ASXL1;LRRC40;TRIM25;PHF19;PSAT1;DNAJC5;RNASEH2A;ATP9A;OAS1B;STMN1;HIST1H4M;TFDP1;CDKN1A;HIST1H3I;CLDN4;CYP2S1;PTMA;MAX;SPINT2;UPP1;TPD52;VANGL1;AEBP2;GOLM1;SIGIRR;ZFP54;F2RL1;ADIPOR1;CEP55;CDCA3;AAAS;TGIF1;RTP4;H3F3B;SEPHS1;CDC7;TLE3;2310022A10RIK;HIST1H2AO;HIST1H2AN;KDM1A;PSIP1;NUDT4;ACTN4;TMEM209;BC030867;SASS6;ATP1B1;H2AFX;RARG;RFC5;LAMC2;DENND1B;TMOD3;UNK;CISH;TJ…
RUNX1	93/1120	4.01769e-09	7.80673e-09	0.306033	-5.71311	NCAPD3;AI661453;SCRIB;TAOK3;CLIC1;TRIM17;SSRP1;DUSP4;LRP8;EHMT2;UPP1;SNX27;BAX;TPD52;8430419L09RIK;ATXN10;RPP25;F11R;WNK1;BIN3;CHAF1A;GM10825;NEURL1B;BCL3;ETV3;DLGAP5;TEX9;BHLHE40;BRCA1;RANBP3;ADIPOR1;FAM134A;NUP160;PHF20L1;NUP155;MLF1IP;TMEM48;CDAN1;CDCA5;CCDC138;WDR90;WDR67;TNK2;GAS2L3;SEPHS2;TLE3;HIST2H2BB;RASSF6;STK38;DCTPP1;ASPM;STK25;PSD4;ARID1A;MAD2L1BP;HDHD2;CYB5R1;RFWD3;DEF6;RAD51C;ATP1B…
MYBL1	27/161	1.30474e-08	2.47486e-08	-0.472977	8.28395	AURKA;CDCA8;CDCA3;POLH;SKP2;NCAPD2;UBR7;FGFR1OP;NEK2;CKLF;TAF9;RANBP17;CDC20;TRIM59;ARHGAP19;BRD8;KHDRBS1;CLIC1;UBE2S;UBE2T;SNRNP70;MSH5;CENPP;ILF3;HNRNPUL1;PSPC1;KIF20A
KLF1	92/1144	2.00273e-08	3.76893e-08	0.353686	-6.04588	SH3YL1;ARF6;ARF5;TAOK3;ATP11B;PKP1;USP18;1700017B05RIK;WHSC1L1;PMS2;HIST1H4F;KIF24;IER5;HINT1;MAX;NDE1;CASP7;TMC8;TMEM55B;WWP2;RAN;GM5803;BIN3;PRDM1;VRK1;PAXIP1;CNIH4;GM10825;CTBP1;SAMD9L;CTDNEP1;CENPC1;AK2;TET3;FUBP1;POU4F1;TUBA1C;APOL7A;MAP3K1;CCNA2;HNF4G;MGAT4B;ZDHHC6;TPX2;HN1;MXD1;EZR;PCK2;BARD1;MTHFD1L;IQGAP1;CHAC2;ARID1B;HMGB1;STK11;CCNG2;POLE3;HNRNPF;PLK2;DCK;RNH1;TSPAN14;SMC2;DEPDC1B;PIM1…
CRX	61/668	1.02505e-07	1.85597e-07	0.183528	-2.84462	SLC9A7;PIK3C3;MIIP;GARS;NUF2;YBX2;BRD8;CAR13;PAPD7;MXD1;EIF4A1;SCML2;MPDU1;TRIM25;ANKHD1;MID1;SSR2;XPO1;IQGAP3;NEIL3;FBXO48;PLK1;SMARCC1;HIST1H3E;HDAC6;DEDD;PTMA;METTL9;PRPF3;PPM1D;OTUD5;TRAIP;RNF126;KDM3B;DRG1;CDC25C;TMEM55B;GDPD1;RAD51C;CADM4;ALOXE3;PRR11;CDKN2AIPNL;MAD2L2;LMNB1;CHEK2;PBRM1;ALMS1;CTNNBIP1;ETV3;ILF2;FAM72A;IGSF9;POC1A;SMC1A;EGR1;EXOSC10;CEP57;GPS2;MGST3;ZFP185
EP300	137/2082	6.81129e-07	1.20585e-06	0.118002	-1.60817	PTBP1;JUP;JUN;EIF2AK3;LASP1;RGS3;ANP32B;SF3A3;DUSP4;USP49;MPRIP;FBXO34;PTMA;SPINT2;8430419L09RIK;BIN3;HIST3H2BA;GOLM1;MYO5C;SLC16A6;BIK;FOXO3;RBMS1;TBC1D10B;TMPO;APITD1;NUP160;TUBGCP3;POU2F1;MLF1IP;CTNNB1;BCL2L11;TUBB4B;MKI67;MAP2K3;TNK2;CDC6;FEM1B;NUP210;CAPN5;CAPN8;DOT1L;BARD1;ACTN4;ARID1A;ARID1B;TRAF4;FRMD8;METTL9;GPR19;PBK;NFYC;TSPAN33;TSPAN14;EFNB2;PIM1;SRSF10;SERINC2;LGALS3;SMAD3;MESDC1;ZFP…
FOXP2	85/1164	2.77343e-06	4.73464e-06	0.251827	-3.08756	SH3YL1;PGAM5;LRRC6;MIIP;ALCAM;TMEM125;MCPH1;EZH2;SCML2;HIST2H3C1;MTMR2;TRIM28;DIAP3;PASK;LRBA;2310008H04RIK;HIST1H4H;2810417H13RIK;HIST1H3H;HINT1;D330045A20RIK;1700023E05RIK;BAX;8430419L09RIK;LMNB1;KLF6;CNIH4;CHAF1A;SPECC1;DLGAP5;BIRC5;KIF20A;CRYGA;IGSF9;MRPS10;5830418K08RIK;GLYR1;CDK19;RPA3;RPA2;POU2F1;LSM11;SRBD1;BCL2L11;NPLOC4;GPR85;HIST1H2AB;NUP210;BARD1;SUV39H1;SUV39H2;PLK2;PNRC2;DDX59;GDPD1…
TBX3	79/1068	4.01884e-06	6.7168e-06	0.346787	-4.13055	MYBL2;EZH2;GLCCI1;ACSL5;MID1;PHF17;DIAP3;ZFP687;PMS1;BAIAP2;LRBA;MYO1B;NRF1;AMMECR1;MAX;1700023E05RIK;HAUS8;OTUD5;FRYL;SNX27;TPD52;ATXN10;GTPBP2;VANGL1;PRDM1;BCOR;KLF5;AEBP2;CELSR1;FANCL;NSMCE2;SPECC1;MDC1;TSTA3;ZWILCH;BC048355;SAE1;POU4F1;CCDC46;LARP7;NUCB2;MDM1;TMEM48;XRCC2;SKP2;TLE3;HIST1H2AN;STK38;CNOT6;IQGAP1;NEIL3;WHSC2;PDE7A;TOR3A;CDK5RAP2;CCDC129;CHD2;ZRANB3;TPK1;OASL1;RFC3;POLQ;DONSON;FA…
BMI1	55/661	5.74751e-06	9.4086e-06	0.422046	-4.88471	RORC;DHX38;PTPRR;MECOM;ARIH2;TAOK3;PKP1;PKP3;SEPHS2;HIST2H2AB;CLN6;AW146020;CAPN5;NUCKS1;AIMP2;LAD1;OAS1C;1600002H07RIK;POLE3;HIST1H3E;IER5;INO80D;LBR;ANO9;CDK2;RFWD3;PWP2;CHKA;PMF1;CBLC;FANCL;FANCM;ARRDC1;MRPL19;ETV3;MYO5C;F2RL1;PMAIP1;ANKRD50;SLC25A28;TIPIN;2610318N02RIK;AK2;LSR;ARHGAP21;LTF;FAM83G;KHDRBS1;ARHGAP27;MCM5;SBF1;PYCARD;ING1;PSRC1;THRAP3
HCFC1	32/306	9.51659e-06	1.50627e-05	0.0843	-0.936007	RANGAP1;PRIM1;DHX38;LSM3;CDCA3;MRE11A;VRK1;ASXL1;GTSE1;EIF4A3;LCORL;TSTA3;UNK;ILF2;RBM15;TSSC4;CBX1;DFFB;TACC3;TIPIN;LLGL1;HIST1H4H;CASC5;WHSC2;BRCA1;KIF2C;CDC45;HAUS6;SNX27;CDC25A;TMEM48;CENPT
RCOR2	37/401	2.59102e-05	4.04741e-05	0.271697	-2.74817	PIK3C3;TGIF1;ARHGEF10L;TLE3;NUFIP1;EZR;CDKN2C;HMGB1;RNF168;IER2;GM4975;ANKS1B;NSL1;LCOR;ANXA4;SLC35C1;GDF15;TPD52;VANGL1;POLE;VRK1;FCHO1;ZBTB45;CDT1;SUMO3;ITPR3;CYP4F16;TMPRSS13;MMS22L;UBAC2;POU4F1;ARHGAP27;APOL7A;MDM1;FRK;SLC10A7;MTL5
ETS2	23/215	0.000119296	0.000173853	0.40447	-3.50162	PAN2;KRT19;MGAT5;TAGLN2;NAA38;KLF5;ACTR3;TLE3;EXOSC2;SSRP1;SHMT1;FOXO3;POR;OAS1B;OAS1C;EIF3D;PTPN3;EHMT2;GRB7;PTMA;PRPF3;HAUS8;MLF1IP
MEF2A	70/1044	0.000231116	0.000330758	0.396175	-3.175	DHX35;SCYL3;TMEM128;EZH2;CLIC1;NUFIP1;SRRT;NUCKS1;PHF17;ZFP687;TACC3;HIST1H4H;IER2;IER5;SLBP;ALOXE3;AURKB;G2E3;WWP2;GTPBP2;FBXL8;EIF1AD;MITD1;NSMCE2;FANCA;MDC1;RFX7;TONSL;MLF1IP;MKI67;NUF2;AP1S3;ZDHHC6;DOT1L;HIRIP3;ASPM;RBL1;ARID1A;ARID1B;WEE1;CCNG2;HNRNPL;GINS2;TOR3A;METTL9;NUP85;NSL1;CHD2;SMC3;AKR1B3;ZRANB3;PDLIM1;PRIM2;PAN2;RFC4;TBRG1;MGAT5;TMEM183A;CDT1;ACTR3;MED4;BMS1;SGOL1;FAM72A;GTF2IRD1;C…
RARG	32/380	0.000399547	0.000561716	0.491935	-3.68189	EFNA1;H1FX;HOOK2;HIST1H2BM;F11R;RARG;BCL2L11;CHKA;NEK2;TAGLN2;SNRNP35;IL1RN;GAS2;CNIH4;CAPN5;DUSP4;MAPK13;SLC25A28;JUNB;NVL;STK11;BHLHE40;DEDD;FUBP1;CLCF1;UBE2C;PMM2;CPSF4;OTUD5;GPRC5A;TCIRG1;GDF15
ZIC3	31/365	0.000427468	0.000597455	0.41652	-3.09176	PDLIM1;TPD52;HIST1H2BP;G2E3;LSM2;JUP;VRK1;FBXO5;KLF6;AEBP2;ASXL1;FAM64A;H3F3B;HIST1H1B;RBBP7;GATAD2A;TRIM25;GRPEL2;STK35;SPATA24;BASP1;TRABD;STMN1;EHMT2;EIF4B;HIST1H3H;KIF23;MAX;UPP1;RNF126;TDP2
PPARG	23/272	0.002329	0.0030879	0.552382	-3.19292	XRCC1;CDCA4;CIZ1;EFNB2;TMEM134;MAD2L1;TAGLN2;MGAT4B;ETS2;MCPH1;GPR85;D2ERTD750E;TOP2A;MPDU1;GATAD2A;ETV3;POR;AK2;TNIP1;MCM2;COQ7;UBE2S;D17WSU92E
HOXD13	18/194	0.00269974	0.00350672	0.784813	-4.4366	RP9;INTS6;BAZ1B;XAB2;PCNA;GPR160;SENP1;UNG;DIAP3;TTK;CTNNBL1;HOXA7;HIST1H4F;UPP1;CENPF;CENPI;GPS2;MGST3
NR1I2	57/939	0.00633433	0.00801008	0.922358	-4.45227	9530008L14RIK;SH3YL1;CPSF3L;BRI3BP;TAF1D;ERI2;DOM3Z;MID1;PHF17;WHSC1L1;BAIAP2;SETD1A;PALB2;2310008H04RIK;MYO1B;KIF14;GDF15;ETS2;CHAF1B;CDCP1;DTL;TNFAIP8L1;BHLHE40;SLC25A13;5830418K08RIK;FETUB;ARAP2;SRBD1;XRCC1;INTS7;KCNK5;LSM2;SKP2;CDHR5;ARHGEF10L;EXOSC8;TLE3;ARVCF;1700024P16RIK;DEK;CLCF1;ANKS1B;LPIN2;CDH1;CCDC111;RAVER1;NMRAL1;CBLC;MAPK13;PAG1;POR;0610040J01RIK;RAD51L1;PTPN3;SBNO2;MAL2;SP2
REST	147/2866	0.0115651	0.0144715	1.0778	-4.56508	MAP3K9;DHX35;ARC;LRRC6;ESRP1;TRIM17;SCML2;USP37;TRIM28;DIAP3;CTNNBL1;SPATA24;TIMELESS;MPRIP;CDKN1A;NRF1;SMARCC1;E2F7;TBCD;WWP2;STK17B;VRK1;AEBP2;CTBP1;CCNF;RAD51;SENP1;LIN54;CYP4F16;BIK;BC048355;LRR1;RAD18;PPIH;TMPO;EPCAM;TUBGCP3;SLC9A7;CTNNB1;PTPRR;CWH43;MYEF2;NPLOC4;CDC7;GMEB2;EXOSC2;AW146020;QTRT1;NUP210;SHMT1;CAPN5;DOT1L;XPO1;SLMO2;ACTN4;ARID1A;HMGB1;TAGAP1;HIST3H2A;GPR19;DEF6;NSL1;DCLRE1A;NU…
LYL1	46/752	0.0116822	0.0145419	1.18264	-5.00341	BTC;SCYL2;MCPH1;SEPHS2;TSG101;YBX2;ZC3H7A;TLE3;SOAT2;CAPN8;RASSF6;DIAP3;STK25;CLDN7;CYB5R1;E2F8;UPP1;RAD51C;PRIM1;PRIM2;DEPDC1B;RPP25;F11R;EFNB2;ALDH16A1;RFC2;BIN3;NEK2;CHEK2;SPNB3;PLA2G4F;AP3B1;ETV3;TEX9;HDGF;MAP4K2;ATAD5;BRCA1;EGR1;REV1;MCM3;HJURP;CENPN;MSH2;SLC10A5;MLF1IP
CDKN2AIP	9/123	0.0896685	0.104033	1.59385	-3.60696	KDM1A;ANKRD54;DNAJC9;SCRIB;TM9SF1;FAM108C;PPP1R15B;DOM3Z;CEP57
ESR1	25/443	0.101417	0.117095	1.1796	-2.52996	RORC;PTBP1;AHCY;FGL1;SEPHS2;ACSL5;CAPN8;WEE1;SLC40A1;P2RY2;DEDD;SH2D4A;GDF15;EFNA1;PIM1;OPTN;CEP110;BIRC5;CISH;PSMD13;SLC16A6;BIK;NUPL1;EIF3D;CENPA
DMRT1	9/132	0.121233	0.139301	1.65092	-3.25416	4930422G04RIK;PMS2;FNDC3A;5730559C18RIK;STK17B;BHLHE40;LARP7;CKS1B;AIMP2
IRF8	18/319	0.146019	0.166183	1.22795	-2.20375	BTC;TBRG1;RTP4;CLSPN;ELF4;USP18;ZDHHC6;MXD1;MTMR2;ETV3;MLKL;ERCC6L;GINS3;LBR;1700023E05RIK;NUP160;SLC10A7;CENPJ
PHC1	45/922	0.193063	0.217651	1.39164	-2.12205	JUN;AI661453;ALCAM;PKP1;ESRP1;THOC6;DUSP4;LRP8;CDKN2C;LRBA;PEG10;CLDN3;9630013D21RIK;HS3ST1;GPSM2;TNFSF9;SLBP;GTPBP2;TACSTD2;BCOR;GJB2;CD14;PMAIP1;EIF3D;LMF2;MAP3K1;CDCA3;BCL2L11;POLE3;TRAF4;VAV3;CDC45;CHFR;EFNB2;SERINC2;SOWAHB;ADAM10;PDIK1L;CBX2;E330016A19RIK;SOX9;HOXA9;MSH2;SLC10A7;SP1
CHD7	8/141	0.260448	0.288181	1.71223	-2.1303	HMGB1;HOXA7;HOXA9;DDX43;DONSON;RAD50;MAP3K1;SNX27
NR4A2	10/207	0.387898	0.423323	1.53743	-1.3216	NUP62;SCML2;ACSL3;RBM15;ANLN;CDK5RAP2;PSMD8;KHDRBS1;OLFR324;GPR111
CDX2	14/334	0.553363	0.59932	1.41985	-0.726907	F11R;PIK3CB;NAV3;CDA;TULP4;ZFP7;PEG10;HOXA7;HOXA9;VAV3;CLDN7;ARHGAP18;SH2D4A;ZW10
FOXP3	10/257	0.6479	0.694386	1.39822	-0.509968	MGAT5;KLF6;ASXL1;SMAD3;ETV3;PAG1;RBL1;PSD4;HIF1A;PDE7A
GLI1	1973-02-01	0.814222	0.853505	2.91418	-0.461617	RAD51L1;TERF1
MTF2	114/2979	0.877825	0.916158	3.65188	-0.319783	RORC;MAP3K8;JUN;PKP1;YBX2;GLCCI1;DUSP4;PHF19;LRP8;USP43;CDKN2A;CDKN2C;BAIAP2;GRWD1;FRYL;HS3ST1;ALOXE3;8430419L09RIK;FBXL8;IL1RL2;GJB2;BIK;BC048355;CD14;FOXO3;MCOLN1;EMP2;BHLHE40;EML3;SLC9A7;SLC9A5;AIF1L;BCL2L11;CWH43;AHCY;BMP8B;MMS19;B3GALNT1;LAD1;TRABD;HMGB3;VAV3;WHSC1;TRADD;PLK2;TOR3A;CLCF1;EFNA1;CIZ1;EFNB2;PIM1;SERINC2;LGALS3;SMAD3;SOWAHB;C030046I01RIK;ILF2;MAPK12;PAG1;CPD;GIPC2;HOXA7;HOXA9;EG…
EED	27/829	0.931091	0.967524	1.62597	-0.0536807	JUN;PKP1;HIST2H3C1;LRP8;CDKN2A;CDKN2C;LRBA;HIST1H3B;HIST1H3C;HIST1H3D;HIST1H3E;IER5;CLDN3;HS3ST1;TACSTD2;CD14;VIPR1;HIST2H2AA1;BCL2L11;HIST1H2AA;HIST1H2BA;TRAF4;EFNB2;SOWAHB;E330016A19RIK;SOX9;HIST2H3B
SUZ12	40/1266	0.977294	0.999985	1.85747	-2.82735e-05	JUN;PKP1;YBX2;PHF19;LRP8;CDKN2A;CDKN2C;LRBA;PEG10;IER5;9630013D21RIK;4930599N23RIK;HS3ST1;GPSM2;PARP12;TACSTD2;PRDM1;GJB2;CD14;VIPR1;MAP3K1;BCL2L11;CWH43;ST14;CDC6;HIST1H2AA;HIST1H2BA;HIST1H2BB;TRAF4;VAV3;GALNT3;EFNB2;SERINC2;SOWAHB;ADAM10;PDIK1L;CBX2;E330016A19RIK;SOX9;SLC10A7
EZH2	39/1298	0.990021	0.999985	2.17817	-3.31549e-05	MECOM;JUN;RCC1;PKP1;ESRP1;DUSP4;CDKN2A;CDKN2C;IER5;CLDN3;CASP7;TNFSF9;PARP12;TACSTD2;BCOR;SENP1;BHLHE40;ZCWPW1;LMF2;SLC9A5;INTS7;AIF1L;BCL2L11;TRAF4;CLCF1;GALNT3;EFNB2;SRSF10;SOWAHB;MAPK12;PAG1;E330016A19RIK;FAM72A;SOX9;HOXA7;HOXA9;EPHX4;KCNQ1;PSTPIP2
RNF2	39/1298	0.990021	0.999985	2.17817	-3.31549e-05	MECOM;JUN;RCC1;PKP1;ESRP1;DUSP4;CDKN2A;CDKN2C;IER5;CLDN3;CASP7;TNFSF9;PARP12;TACSTD2;BCOR;SENP1;BHLHE40;ZCWPW1;LMF2;SLC9A5;INTS7;AIF1L;BCL2L11;TRAF4;CLCF1;GALNT3;EFNB2;SRSF10;SOWAHB;MAPK12;PAG1;E330016A19RIK;FAM72A;SOX9;HOXA7;HOXA9;EPHX4;KCNQ1;PSTPIP2
JARID2	22/1117	0.999985	0.999985	2.2288	-3.39256e-05	MECOM;PKP1;CDKN2C;SPATA24;IER5;GRWD1;PARP12;TACSTD2;FBXL8;SPNB3;BCOR;GJB2;POU4F1;FAM134A;ITPRIPL2;VAV3;ANKS1B;GALNT3;E330016A19RIK;SOX9;HOXA7;HOXA9
