# Supplementary material for: In Vivo Disruption of an Rb–E2F–Ezh2 Signaling Loop Causes Bladder Cancer
Source: Oxford University Press journal article supplement (doi:10.1158/0008-5472.can-14-1218), 2014-09-25
Supplement: 00085472can141218-sup-130432_2_supp_2585852_n9gpn1.xlsx [file 00085472can141218-sup-130432_2_supp_2585852_n9gpn1.xlsx]

## Sheet: Chea Up recurrentes t test sin 
	Target/Input	Targets/Database	Fraction/Input	Fraction/Database	Difference	p-Value
KDM5B	45	3724	0.420561	0.0829491	5.07011	4.67e-21	ABCD3;ALKBH1;ARHGAP11A;AURKB;BRD7;BUB1;BUB1B;CASC5;CCDC6;CCNB1;CCNB2;CDCA2;CDK1;CHD1;CKAP5;CNOT6;DNM1L;ELP3;ESCO2;FAM76A;FEM1C;GRPEL2;GTF2E2;HERPUD1;KDM2B;KIF11;KIF2C;KPNA2;KPNA6;LPCAT3;MKI67;NAE1;NCAPD3;NUSAP1;OSBPL9;PBK;PCGF6;PHACTR4;PPP2CA;RAB5A;RBM22;SASH1;SEC24A;SGOL2;ZDHHC16	20.3
E2F4	35	2998	0.327103	0.066778	4.89836	1.31e-15	ABCD3;ARHGAP11A;AURKB;BRD7;BTBD7;BUB1B;CASC5;CCDC6;CCNB2;CDC20;CKAP5;DEPDC1;DNM1L;FAM76A;HERPUD1;ICMT;ID3;KIAA0101;KIF11;KIF2C;LPCAT3;MKI67;NAE1;NCAPD3;NT5C2;NUSAP1;OSBPL9;PCGF6;PTGER2;SLC39A9;STIL;SYVN1;TXNDC11;YTHDF2;ZDHHC16	14.9
CREM	45	5776	0.420561	0.128656	3.26888	7.38e-14	ABLIM3;ARHGAP11A;AURKB;BRD7;BTBD7;BUB1;CASC5;CCNB2;CDC20;CDCA2;CHD1;CNOT6;DAG1;FAM76A;FEM1C;GRPEL2;GTF2E2;H2AFY;HERPUD1;ICMT;KDM2B;KIF11;KIF2C;KPNA2;KPNA6;LPCAT3;NCAPD3;NT5C2;NUSAP1;OSBPL9;PCGF6;PLCXD1;PPP2CA;RAB5A;RBM22;SASH1;SEC24A;SLAIN2;SLC19A2;STIL;SYVN1;TRAM2;TXNDC11;UGDH;YTHDF2	13.1
HNF4A	42	6083	0.392523	0.135494	2.89698	4.01e-11	ABCD3;ABLIM3;ALKBH1;AURKB;BRD7;BUB1B;CASC5;CDCA2;CNOT6;DAG1;ELP3;FAM54A;FAM76A;FEM1C;GRPEL2;GTF2E2;HERPUD1;ICMT;ID3;KIAA0101;KPNA2;LPCAT3;NT5C2;OLFML1;OSBPL9;PHACTR4;PPP2CA;RBM22;SASH1;SEC24A;SLC19A2;SLC27A2;SLC39A9;SPATA13;SPINK1;TMEM167A;TRAM2;TXNDC11;UGDH;YTHDF2;ZFY;ZNF317	10.4
MYC	31	3868	0.28972	0.0861566	3.36271	1.14e-09	ARHGAP11A;AURKB;BRD7;BUB1;BUB1B;CASC5;CCNB1;CDC20;CDCA2;CNOT6;CRISPLD2;DAG1;EIF1AY;ESCO2;F3;FEM1C;GTF2E2;HERPUD1;ID3;KIF11;KPNA2;KPNA6;NCAPD3;NUSAP1;PBK;SEC24A;SLC19A2;SLC26A6;SYVN1;YTHDF2;ZDHHC16	8.94
ZFX	27	3249	0.252336	0.0723689	3.48681	8.53e-09	AURKB;BRD7;BTBD7;BUB1;CCNB2;CNOT6;DAG1;DNM1L;FEM1C;H2AFY;HIST1H2BH;KPNA2;KPNA6;NCAPD3;NT5C2;OXSM;PPP2CA;RAB5A;RBM22;SEC24A;SLC12A2;SLC27A2;STIL;TXNDC11;UBE2A;UGDH;ZDHHC16	8.07
FOXP1	29	3724	0.271028	0.0829491	3.2674	8.76e-09	ABLIM3;AURKB;BTBD7;CHD1;CKAP5;CYP2F1;DAG1;F3;FEM1C;GLT8D2;ICMT;ID3;KIAA0101;KIF11;KPNA2;LPCAT3;NAE1;NT5C2;OXSM;PLCXD1;PPP2CA;RBM22;SASH1;SGOL2;SLAIN2;SLC19A2;SLC37A4;SLC39A9;SYVN1	8.06
MYBL2	21	2250	0.196262	0.0501169	3.91607	7.96e-08	ARHGAP11A;AURKB;BUB1B;CASC5;CCDC6;CCNB1;CCNB2;CDC20;CDCA2;DNM1L;FEM1C;HIST1H2BH;KIF11;KIF2C;KPNA2;NUSAP1;PHACTR4;RAB5A;SGOL2;SYVN1;TXNDC11	7.1
E2F1	29	4172	0.271028	0.0929279	2.91654	1.03e-07	ARHGAP11A;AURKB;BRD7;BUB1B;CASC5;CCNB2;DNM1L;EBP;EIF1AY;ESCO2;GTF2E2;HERPUD1;ID3;KIF2C;KPNA6;NCAPD3;NT5C2;NUSAP1;OXSM;PCGF6;PLCXD1;PPP2CA;RAB5A;SASH1;SEC24A;SLC12A2;SLC19A2;UBE2A;YTHDF2	6.99
NANOG	18	1686	0.168224	0.0375543	4.4795	1.11e-07	ARHGAP11A;BMP5;BUB1B;CCDC6;FAM54A;FEM1C;GRPEL2;HIST1H2BH;ICMT;KIAA0101;NT5C2;NUSAP1;PTGER2;RAB5A;RBM22;SASH1;SLC39A9;TDO2	6.95
CREB1	23	3057	0.214953	0.0680922	3.1568	7.77e-07	ARHGAP11A;BUB1B;CASC5;CHD1;FAM76A;GTF2E2;H2AFY;KDM2B;KIF11;KIF2C;KPNA2;LAYN;NCAPD3;NT5C2;OSBPL9;PPP2CA;RAB5A;RBM22;SEC24A;SGOL2;SLAIN2;SYVN1;UGDH	6.11
FLI1	33	5834	0.308411	0.129948	2.37335	1.24e-06	ABCD3;AURKB;BUB1;C6ORF211;CASC5;CCNB1;CHD1;CYP2F1;ELP3;GRPEL2;H2AFY;ID3;KIF2C;MKI67;NCAPD3;NT5C2;OXSM;PLCXD1;PPP2CA;RAB5A;RBM22;SASH1;SEC24A;SGOL2;SLAIN2;SLC26A6;SLC39A9;STIL;SYVN1;TMEM167A;UCA1;UGDH;ZDHHC16	5.91
HOXB4	17	1824	0.158879	0.0406281	3.91055	1.65e-06	ARHGAP11A;BUB1;CDCA2;DAG1;EBP;EIF1AY;KIF2C;KPNA6;OSBPL9;PCGF6;PHACTR4;PPP2CA;SLC27A2;SLC37A4;SYVN1;TXNDC11;YTHDF2	5.78
AR	17	1857	0.158879	0.0413632	3.84106	2.1e-06	15-SEP;ABCD3;CHMP2B;CKAP5;CRISPLD2;CYORF15A;DNM1L;FEM1C;GTF2E2;MYOCD;OSBPL9;OXSM;PTGER2;SASH1;SLAIN2;SPATA13;STIL	5.68
KDM6A	9	479	0.0841121	0.0106693	7.88354	2.7e-06	ALKBH1;ARHGAP11A;BUB1B;CDC20;KIAA0101;KIF2C;NUSAP1;OSBPL9;SLC39A9	5.57
GABP	20	2639	0.186916	0.0587816	3.17984	4.17e-06	ALKBH1;CHD1;DNM1L;FZD4;GRPEL2;ICMT;KIAA0101;KIF11;KPNA2;LPCAT3;NCAPD3;PCGF6;PPP2CA;RAB5A;SEC24A;SGOL2;SLC37A4;SYVN1;TXNDC11;UGDH	5.38
SALL4	14	1419	0.130841	0.0316071	4.13961	7.96e-06	ARHGAP11A;CYP2F1;ELP3;F3;FAM54A;FEM1C;H2AFY;ID3;LAYN;OLFML1;OSBPL9;PAGE1;SGOL2;SLC12A2	5.1
SOX2	19	2564	0.17757	0.057111	3.10921	1.03e-05	ABLIM3;ANKRD22;AURKB;BMP5;BRD7;CD24;CDCA2;ELP3;FAM54A;GRPEL2;H2AFY;HIST1H2BH;ICMT;PBK;PCGF6;SLC12A2;SPINK1;TRAM2;UCA1	4.99
ELK1	11	917	0.102804	0.0204254	5.03312	1.39e-05	ARHGAP11A;C6ORF211;CCNB2;CHD1;GRPEL2;RBM22;SGOL2;SLC39A9;STIL;SYVN1;UBE2A	4.86
RUNX1	27	5071	0.252336	0.112952	2.23401	4.6e-05	BUB1B;C6ORF211;CASC5;CKAP5;CYP2F1;DAG1;GRPEL2;H2AFY;ID3;KIF11;MIR153-2;NT5C2;PCGF6;PHACTR4;PPP2CA;RAB5A;SGOL2;SLAIN2;SLC39A9;SPATA13;SPINK1;STIL;SYVN1;TMEM167A;TRAM2;TXNDC11;UGDH	4.34
TET1	15	1994	0.140187	0.0444147	3.15631	8.32e-05	BUB1B;ESCO2;KPNA6;LAYN;NT5C2;PBK;PDGFRA;PHACTR4;RAB5A;SEC24A;SLC26A6;SLC27A2;SPATA13;TXNDC11;UGDH	4.08
PPARG	21	3565	0.196262	0.0794075	2.47158	9.72e-05	ABCD3;ARHGAP11A;BRD7;BUB1B;CDK1;CHD1;F3;FAM76A;FZD4;ID3;NT5C2;OSBPL9;PDGFRA;PROK1;RAB5A;SASH1;SGOL2;SLC19A2;STIL;SYVN1;TRAM2	4.01
TP63	23	4229	0.214953	0.0941976	2.28194	0.000141	ABCD3;ABLIM3;ANKRD22;ARHGAP11A;BUB1B;CCDC6;CNOT6;CRISPLD2;DNM1L;ELP3;F3;H2AFY;HERPUD1;HIST1H2BH;ICMT;KDM2B;KPNA6;NAE1;NT5C2;PLCXD1;PROK1;SYVN1;TXNDC11	3.85
ZFP42	12	1480	0.11215	0.0329658	3.402	0.00023	CNOT6;DAG1;FEM1C;HIST1H2BH;KIF11;KPNA6;NUSAP1;RAB5A;SEC24A;SGOL2;SLC19A2;ZDHHC16	3.64
FOXA2	18	2968	0.168224	0.0661098	2.54462	0.000232	ABCD3;AURKB;BRD7;BUB1B;CDCA2;CRISPLD2;GTF2E2;HERPUD1;ID3;KPNA2;KPNA6;OSBPL9;PCGF6;SPATA13;SPINK1;STIL;TRAM2;UGDH	3.63
PHF8	12	1490	0.11215	0.0331886	3.37916	0.000244	ABCD3;CKAP5;DEPDC1;DNM1L;H2AFY;HERPUD1;LPCAT3;PPP2CA;SLC12A2;SLC19A2;SLC26A6;SLC39A9	3.61
TCFCP2L1	14	1987	0.130841	0.0442588	2.95627	0.000285	CDC20;DAG1;DNM1L;ICMT;ID3;NPFFR2;PHACTR4;PLCXD1;RAB5A;SGOL2;SLC26A6;STIL;TXNDC11;UGDH	3.55
XRN2	12	1529	0.11215	0.0340572	3.29297	0.000308	BUB1;CDC20;ELP3;FAM54A;GRPEL2;ID3;KIF11;KPNA6;PHACTR4;SGOL2;SLC19A2;UBE2A	3.51
MYCN	15	2261	0.140187	0.050362	2.78359	0.000322	ABCD3;CCNB1;CDC20;GRPEL2;H2AFY;HERPUD1;NCAPD3;PCGF6;PHACTR4;RAB5A;SASH1;SGOL2;STIL;TXNDC11;ZDHHC16	3.49
GATA4	14	2039	0.130841	0.0454171	2.88088	0.000368	CRISPLD2;DAG1;F3;H2AFY;HERPUD1;ID3;KIF2C;MKI67;OXSM;PCGF6;PDGFRA;PHACTR4;SLAIN2;SLC26A6	3.43
RUNX2	19	3423	0.17757	0.0762446	2.32895	0.000462	ABCD3;C6ORF211;CDCA2;CNOT6;DAG1;DNM1L;ELP3;F3;ICMT;KIAA0101;KIF2C;MIR153-2;OSBPL9;OXSM;PAGE1;SASH1;SPATA13;TMEM167A;TRAM2	3.34
SMAD2	13	1936	0.121495	0.0431228	2.81742	0.000742	ARHGAP11A;BTBD7;C6ORF211;CCNB2;CHD1;DNM1L;F3;GTF2E2;ID3;NUSAP1;SLC19A2;SLC39A9;SPINK1	3.13
SMAD3	13	1936	0.121495	0.0431228	2.81742	0.000742	ARHGAP11A;BTBD7;C6ORF211;CCNB2;CHD1;DNM1L;F3;GTF2E2;ID3;NUSAP1;SLC19A2;SLC39A9;SPINK1	3.13
POU5F1	7	622	0.0654206	0.0138546	4.72196	0.000788	BUB1B;CCDC6;EIF1AY;ICMT;KIAA0101;RAB5A;RBM22	3.1
EKLF	10	1239	0.0934579	0.0275977	3.38644	0.000808	CDC20;ELP3;H2AFY;KPNA2;MKI67;NT5C2;NUSAP1;PPP2CA;SPATA13;YTHDF2	3.09
TRIM28	17	3072	0.158879	0.0684263	2.32189	0.000984	ABCD3;CNOT6;DNM1L;FZD4;KPNA2;NCAPD3;PCGF6;PHACTR4;PPP2CA;RBM22;SEC24A;SGOL2;SLC19A2;SLC27A2;TXNDC11;UBE2A;YTHDF2	3.01
